# Supplementary material
Source: PubMed Central journal article supplement (PMC5097459)

## Supporting Information

### Catalytic, Diastereoselective 1,2 Difluorination of Alkenes

Steven M. Banik<sup>†</sup>, Jonathan William Medley<sup>†</sup>, Eric N. Jacobsen\*

*Department of Chemistry & Chemical Biology, Harvard University, Cambridge, Massachusetts  
02138*

\*Email: jacobsen@chemistry.harvard.edu

#### Contents

|                                                                                                                                   |      |
|-----------------------------------------------------------------------------------------------------------------------------------|------|
| 1. General Experimental Procedures.....                                                                                           | S1   |
| 2. Note of Caution.....                                                                                                           | S1   |
| 3. Materials.....                                                                                                                 | S2   |
| 4. Instrumentation.....                                                                                                           | S2   |
| 5. Optimization Tables and Control Experiments.....                                                                               | S3   |
| 6. Synthesis and Characterization of Catalysts and Substrates.....                                                                | S6   |
| 7. Procedures for 1,2-Difluorination and Characterization of Products.....                                                        | S18  |
| 8. Enantioselective Reaction.....                                                                                                 | S34  |
| 9. Chiral GC Trace.....                                                                                                           | S34  |
| 10. Computational Studies of Aryl Iodine(III) Intermediates.....                                                                  | S35  |
| 11. X-Ray Crystallography Information.....                                                                                        | S40  |
| 12. Supporting Information References and Notes.....                                                                              | S108 |
| 13. <sup>1</sup> H, <sup>13</sup> C, and <sup>19</sup> F NMR Spectra of Substrates, Catalysts, and 1,2-Difluorination Products... | S112 |

**General experimental procedures.** All reactions for the preparation of substrates and catalysts were performed in standard, dry glassware fitted with rubber septa under an inert atmosphere of nitrogen unless otherwise described. All difluorination reactions were performed in low density polyethylene tubes sealed with a low density polyethylene cap under an atmosphere of air. Stainless steel gas-tight syringes or cannulae were used to transfer air- and moisture-sensitive liquids. Reported concentrations refer to solution volumes at room temperature. Concentration of organic solutions under reduced pressure was performed using house vacuum (ca. 40 mm Hg) at 30 °C. Column chromatography was performed with ZEOprep® 60 (40–63 micron) silica gel from American Scientific. Thin layer chromatography (TLC) was used for reaction monitoring and product detection was performed using pre-coated glass plates covered with 0.20 mm silica gel with fluorescent indicator; plates were visualized by exposure to UV light ( $\lambda_{\text{ex}} = 254 \text{ nm}$ ) or by staining with potassium permanganate or ninhydrin.

**CAUTION:** Pyridine•9HF is a corrosive and toxic substance that will corrode glassware. Safe handling can be conducted with plastic syringes and metal needles, with NaHCO<sub>3</sub> (aq.) or NaOH (aq.) employed to quench excess HF. Though reactions should not be conducted in glassware when employing pyridine•9HF, glassware may be used to quench reactions provided sufficient quantities of base are present. Always handle pyridine•9HF while wearing gloves and in a fumehood. As a precautionary measure, have calcium gluconate gel nearby and apply immediately and liberally on skin exposed to HF.

**Materials.** Reagents were purchased in reagent grade from commercial suppliers and used as received, unless otherwise described. Anhydrous solvents (benzene, dichloromethane, diethyl ether, *N,N*-dimethylformamide, tetrahydrofuran, and toluene) were prepared by passing the solvent through an activated alumina column. Triethylamine and diisopropylethylamine were distilled over calcium hydride at atmospheric pressure. The molarity of *n*-butyllithium solutions was determined by titration against diphenylacetic acid<sup>1</sup> (average of three titrations).

**Instrumentation.** Proton nuclear magnetic resonance (<sup>1</sup>H NMR) spectra were recorded on a Varian Mercury-400 or an Inova-500 spectrometer, are reported in parts per million downfield from tetramethylsilane, and are referenced to the residual proton resonances of the NMR solvent (CDCl<sub>3</sub>: 7.26 [CHCl<sub>3</sub>], acetone-*d*<sub>6</sub>: 2.05 [acetone-*d*<sub>5</sub>], DMSO-*d*<sub>6</sub>: 2.50 [DMSO-*d*<sub>5</sub>]). Proton-decoupled carbon-13 nuclear magnetic resonance (<sup>13</sup>C {<sup>1</sup>H} NMR) spectra were recorded on an Inova-500 spectrometer, are reported in parts per million downfield from tetramethylsilane, and are referenced to the carbon resonances of the NMR solvent (CDCl<sub>3</sub>: 77.23, acetone-*d*<sub>6</sub>: 29.92, DMSO-*d*<sub>6</sub>: 39.61). Chemical shifts for fluorine-19 nuclear magnetic resonance (<sup>19</sup>F NMR) were recorded on a Varian Mercury-400 or an Inova-500 spectrometer, are reported in parts per million downfield from chlorotrifluoromethane, and are referenced to the fluorine resonance of chlorotrifluoromethane (δ = 0). Data are represented as follows: chemical shift, multiplicity (br = broad, s = singlet, d = doublet, t = triplet, q = quartet, quin = quintet, sept = septet, m = multiplet), coupling constants in Hertz (Hz), integration. Optical rotations were measured using a 1 mL cell with a 5 cm path length on a Jasco P-2000 digital polarimeter. Infrared spectra were recorded using a Bruker Tensor 27 FT-IR spectrometer. Data are represented as follows: frequency of absorption (cm<sup>-1</sup>), intensity of absorption (s = strong, m = medium, w = weak, br = broad). High-resolution mass spectrometric data were obtained on an Agilent 6210 time-of-flight HPLC/MS spectrometer (ESI-TOF). Low-resolution mass spectrometric data were obtained on a Waters Quattro Micro GCMS (EI<sup>+</sup>). Chiral GC analysis was performed using an Agilent 7890A GC system using commercially available CHIRALDEX columns.

**General procedure for catalyst and reaction condition optimization:**

Catalyst (2.6  $\mu\text{mol}$ –10.4  $\mu\text{mol}$ , 5.0–20.0 mol%) and *m*-chloroperbenzoic acid (*m*CPBA, 77% by weight, 12.8–17.4 mg, 57.2–78.0  $\mu\text{mol}$ , 1.10–1.50 equiv), and dichloromethane (0.52–2.60 mL) were combined in a polyethylene tube at room temperature. Pyridinium poly(hydrogen fluoride) (pyr•9HF, 0.0400 mL–0.140 mL, 25.0–100.0 equiv HF) was added via micropipette, followed by **2a** (9.6 mg, 52.0  $\mu\text{mol}$ , 1 equiv) and dodecane (11.4  $\mu\text{L}$ , 52.0  $\mu\text{mol}$ , 1.00 equiv). The reaction was stirred for 6–12 hours at room temperature. The reaction was cooled to  $-78\text{ }^\circ\text{C}$  and basic alumina (approximately 750 mg) was added slowly. The reaction was allowed to warm to room temperature with stirring and was filtered. The crude mixture was analyzed by GC to determine starting material conversion and yield of product.

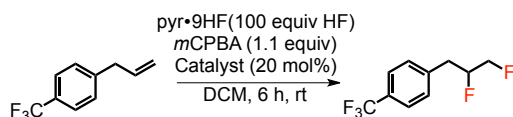

| Entry | Catalyst | Conversion <sup>a</sup> | Yield <sup>a</sup> |
|-------|----------|-------------------------|--------------------|
| 1     |          | 100%                    | 70%                |
| 2     |          | 100%                    | 46%                |
| 3     |          | 100%                    | 45%                |
| 4     |          | 100%                    | 32%                |
| 5     |          | 100%                    | 57%                |
| 6     |          | 100%                    | 70%                |
| 7     | none     | 100%                    | 0%                 |

**Table S1:** Catalyst optimization. <sup>a</sup> Determined by GC using dodecane as an internal standard.

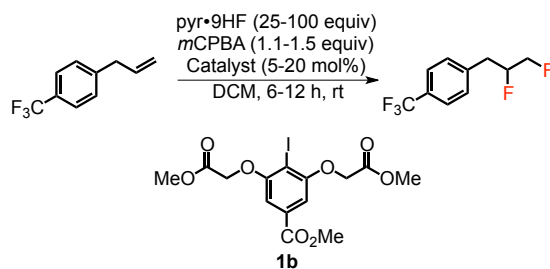

| Entry          | Mol% Catalyst | Equiv. mCPBA (HF) | [Substrate]/ (M) | Conversion <sup>a</sup> | Yield <sup>a</sup> |
|----------------|---------------|-------------------|------------------|-------------------------|--------------------|
| 1              | 20            | 1.5 (5)           | 0.1              | 75%                     | 1%                 |
| 2              | 20            | 1.5 (10)          | 0.1              | 80%                     | 18%                |
| 3              | 20            | 1.5 (100)         | 0.1              | 100%                    | 58%                |
| 4              | 5             | 1.5 (25)          | 0.1              | 100%                    | 44%                |
| 5              | 10            | 1.5 (25)          | 0.1              | 100%                    | 50%                |
| 6              | 20            | 1.1 (25)          | 0.1              | 100%                    | 60%                |
| 7              | 20            | 1.5 (25)          | 0.05             | 100%                    | 62%                |
| 8 <sup>b</sup> | 10            | 1.1 (25)          | 0.05             | 98%                     | 61%                |
| 9 <sup>b</sup> | 20            | 1.1 (100)         | 0.05             | 100%                    | 70%                |

**Table S2.** Reaction condition optimization. <sup>a</sup> Determined by GC using dodecane as an internal standard. <sup>b</sup> Reaction run for 12 hours.

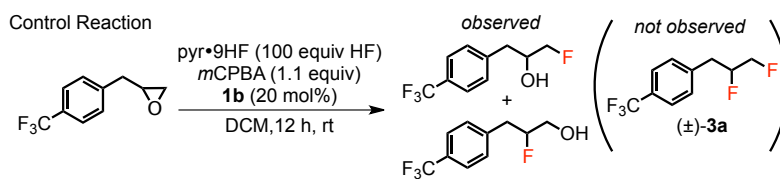



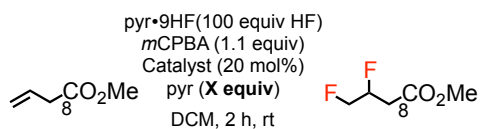

| Entry    | Catalyst | Equiv Pyr  | Conversion <sup>a</sup> | Yield <sup>a</sup> |
|----------|----------|------------|-------------------------|--------------------|
| 1        |          | 0.5        | 98%                     | 13%                |
| 2        | "        | 1.0        | 81%                     | 18%                |
| 3        | "        | 2.0        | 77%                     | 20%                |
| 4        | "        | 4.0        | 70%                     | 28%                |
| <b>5</b> | "        | <b>6.0</b> | <b>75%</b>              | <b>67%</b>         |
| 6        | "        | 8.0        | 10%                     | 0%                 |

**Table S3.** Pyridine additive optimization for isolated alkenes. <sup>a</sup>  
 Determined by GC using dodecane as an internal standard.

### Enantioselective Reaction Control Experiments:

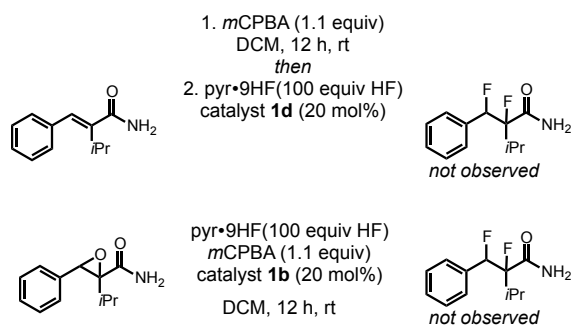

## Synthesis and Characterization of Catalysts and Substrates

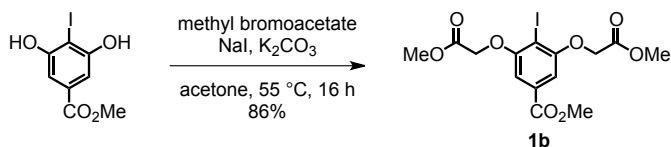

**1b**: Methyl bromoacetate (6.43 mL, 68.0 mmol, 4.00 equiv) was added via syringe to a vigorously stirred mixture of methyl 3,5-dihydroxy-4-iodobenzoate<sup>2</sup> (5.00 g, 17.0 mmol, 1 equiv), K<sub>2</sub>CO<sub>3</sub> (9.39 g, 68.0 mmol, 4.00 equiv), and NaI (2.55 g, 17.0 mmol, 1.00 equiv) in acetone (160 mL) at room temperature. The resulting mixture was warmed to 55 °C in an oil bath. After 16 h, the reaction mixture was cooled to room temperature and was concentrated under reduced pressure. The resulting solids were dissolved in ethyl acetate (250 mL) and water (150 mL). The organic layer was separated, and the aqueous layer was extracted with ethyl acetate (250 mL). The combined organic layers were dried over anhydrous MgSO<sub>4</sub>, were filtered, and were concentrated under reduced pressure. The resulting solid was recrystallized twice from ethyl acetate to give **1b** (6.40 g, 86%) as a white solid. <sup>1</sup>H NMR (500 MHz, CDCl<sub>3</sub>) δ 7.07 (s, 2H), 4.78 (s, 4H), 3.90 (s, 3H), 3.81 (s, 6H); <sup>13</sup>C NMR (125.7 MHz, CDCl<sub>3</sub>) δ 168.6, 166.1, 158.4, 132.1, 106.7, 86.0, 66.5, 52.7, 52.6; FTIR (thin film) ν 3002 (w), 1758 (s), 1719 (s), 1581 (m), 1435 (m), 1417 (s), 1241 (s), 1209 (s), 1077 (s) cm<sup>-1</sup>; HRMS (ESI-TOF) Calc'd for C<sub>14</sub>H<sub>15</sub>IO<sub>8</sub> [M+H]<sup>+</sup>: 438.9884; found 438.9889.

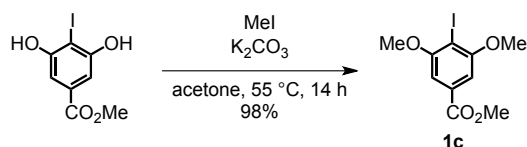

**1c**: Iodomethane (8.51 mL, 136 mmol, 4.00 equiv) was added via syringe to a vigorously stirred mixture of methyl 3,5-dihydroxy-4-iodobenzoate<sup>2</sup> (10.0 g, 34.0 mmol, 1 equiv), and K<sub>2</sub>CO<sub>3</sub> (18.8 g, 136 mmol, 4.00 equiv) in acetone (170 mL) at room temperature. The resulting mixture was warmed to 55 °C in an oil bath. After 14 h, the reaction mixture was cooled to room temperature, diethyl ether (400 mL) was added, and the resulting mixture was filtered. The filtrate was washed sequentially with water (200 mL) and brine (100 mL), was dried over anhydrous MgSO<sub>4</sub>, was filtered, and was concentrated under reduced pressure to give **1c** (10.7 g, 98%) as a white powder. <sup>1</sup>H NMR (500 MHz, CDCl<sub>3</sub>) δ 7.10 (s, 2H), 3.89 (s, 6H), 3.87 (s, 3H); <sup>13</sup>C NMR (125.7 MHz, CDCl<sub>3</sub>) δ 166.7, 159.7, 132.0, 104.9, 84.4, 57.0, 52.6; FTIR (thin film) ν 3090 (w), 2949 (w), 1712 (s), 1581 (m), 1452 (m), 1404 (s), 1325 (s), 1240 (s), 1229 (s), 1116 (s) cm<sup>-1</sup>; HRMS (ESI-TOF) Calc'd for C<sub>10</sub>H<sub>12</sub>IO<sub>4</sub> [M+H]<sup>+</sup>: 322.9775; found 322.9780.

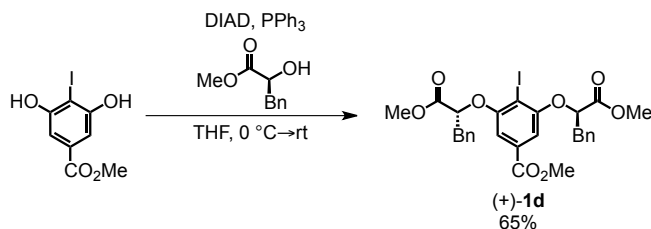

**1d**: Diisopropyl azodicarboxylate (1.55 mL, 7.90 mmol, 2.31 equiv) was added dropwise via syringe over 30 minutes to a stirred suspension of methyl 3,5-dihydroxy-4-iodobenzoate<sup>2</sup> (500 mg, 3.42 mmol, 1 equiv), triphenylphosphine (2.44 g, 9.30 mmol, 2.70 equiv), and benzyl (S)-methyl 2-hydroxy-3-phenylpropanoate (1.29 g, 7.18 mmol, 2.10 equiv) in tetrahydrofuran (32.0

mL) at 0 °C. The reaction mixture was warmed to room temperature. After 12 hours, the reaction mixture was concentrated under reduced pressure. The residue was purified by flash column chromatography on a column composed of basic alumina layered on top of silica gel (1:1 w/w) (5 to 60% diethyl ether in hexanes) to give **1d** as a white solid (1.38 g, 65%). <sup>1</sup>H NMR (500 MHz, CDCl<sub>3</sub>) δ 7.43 (d, *J* = 7.6 Hz, 4H), 7.32 (t, *J* = 7.3 Hz, 4H), 7.27–7.23 (m, 2H), 6.88 (s, 2H), 4.94 (dd, *J* = 4.9, 7.8 Hz, 2H), 3.85 (s, 3H), 3.70 (s, 6H), 3.37 (dd, *J* = 7.8, 14.2 Hz, 2H), 3.33 (dd, *J* = 4.9, 14.2 Hz, 6H); <sup>13</sup>C NMR (125.7 MHz, CDCl<sub>3</sub>) δ 170.7, 166.1, 158.2, 136.1, 131.8, 130.1, 128.6, 127.3, 106.6, 86.3, 78.9, 52.6, 52.6, 39.2; FTIR (thin film) ν 3028 (w), 2952 (w), 1753 (s), 1721 (s), 1577 (m), 1434 (m), 1417 (s), 1325 (m), 1243 (s), 1197 (s), 1113 (s), 1011 (m) cm<sup>-1</sup>; HRMS (ESI-TOF) Calc'd for C<sub>28</sub>H<sub>28</sub>IO<sub>8</sub> [M+H]<sup>+</sup>: 619.0823; found 619.0817; [α]<sub>D</sub><sup>22</sup> = +58.0 (c = 0.80, CHCl<sub>3</sub>).

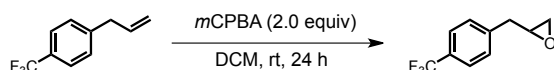

**2-(4-(trifluoromethyl)benzyl)oxirane:** *meta*-Chloroperoxybenzoic acid (77%) (*m*CPBA, 241 mg, 1.07 mmol, 2.00 equiv) and 1-allyl-4-trifluoromethyl benzene (100 mg, 0.54 mmol, 1 equiv) were dissolved in dichloromethane (5 mL) and the reaction mixture was stirred at room temperature for 24 hours. The reaction mixture was poured into saturated aqueous NaHCO<sub>3</sub> solution (15 mL) and the organic layer was separated. The aqueous layer was further extracted with dichloromethane (10 mL), and the combined organic layers were dried with anhydrous MgSO<sub>4</sub> and concentrated under reduced pressure. The resulting residue was purified by flash column chromatography on silica gel (0% to 20% diethyl ether in hexanes) to give 2-(4-(trifluoromethyl)benzyl)oxirane (64 mg, 59%) as a colorless oil. <sup>1</sup>H NMR (500 MHz, CDCl<sub>3</sub>) 7.57 (d, *J* = 8.3 Hz, 2H), 7.38 (d, *J* = 7.8 Hz, 2H), 3.19–3.12 (m, 1H), 3.00–2.87 (m, 2H), 2.81 (dd, *J* = 7.8, 7.8 Hz, 1H), 2.54 (dd, *J* = 4.9, 2.4 Hz, 1H); <sup>13</sup>C NMR (125.7 MHz, CDCl<sub>3</sub>) 141.5, 129.6, 129.3 (q, *J* = 32.6 Hz), 125.6 (q, *J* = 3.8 Hz), 124.4 (q, *J* = 271.4 Hz), 52.1, 46.8, 38.6; <sup>19</sup>F NMR (470.4 MHz, CDCl<sub>3</sub>) –62.5; FTIR (thin film) ν 3055 (w), 2997 (w), 2922 (w), 1323 (s), 1105 (s), 1066 (s); HRMS (ESI-TOF) Calc'd for C<sub>10</sub>H<sub>9</sub>F<sub>3</sub>O [M+H]<sup>+</sup>: 203.0684; found 203.0678.

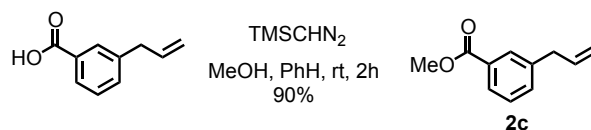

**2c:** (Trimethylsilyl)diazomethane solution (2 M in hexanes, 1.35 mL, 2.71 mmol, 1.10 equiv) was added dropwise via syringe to a stirred mixture of 3-allylbenzoic acid (400 mg, 2.47 mmol, 1 equiv) in methanol (5.4 mL) and benzene (13 mL) at room temperature. After 2 hours, HCl solution (2.0 M in diethyl ether, 1.00 mL) was added via syringe, and the mixture was concentrated under reduced pressure. The resulting residue was purified by flash column chromatography on silica gel (0% to 30% diethyl ether in hexanes) to give **2c** (392 mg, 90%) as a colorless oil. The spectral data for **2c** were in accordance with literature data.<sup>3</sup>

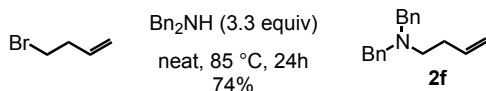

**2f:** *N,N*-dibenzylamine (3.85 mL, 20.0 mmol, 3.33 equiv) and 4-bromo-1-butene (1.02 mL, 6.80 mmol, 1 equiv) were combined at room temperature, and the resulting mixture was warmed to 85 °C in an oil bath and stirred for 24 hours. The resulting mixture was cooled to room temperature and purified by flash column chromatography on silica gel (0% to 20% ethyl acetate in hexanes) to give **2f** (1.26 g, 74%) as a pale brown oil. <sup>1</sup>H NMR (500 MHz, CDCl<sub>3</sub>) δ 7.43–7.42 (m, 4H),

7.36 (t,  $J = 7.6$  Hz, 4H), 7.29–7.26 (m, 2H), 5.84–5.79 (m, 1H), 5.08–5.00 (m, 2H), 3.63 (s, 4H), 2.57 (t,  $J = 7.3$  Hz, 2H), 2.34 (q,  $J = 7.0$  Hz, 2H);  $^{13}\text{C}$  NMR (125.7 MHz,  $\text{CDCl}_3$ )  $\delta$  140.0, 137.2, 129.0, 128.3, 127.0, 115.5, 58.3, 53.1, 31.8; FTIR (thin film)  $\nu$  2793 (w), 1493 (m), 1452 (m), 908 (m), 731 (m), 696 (s)  $\text{cm}^{-1}$ ; HRMS (ESI-TOF) Calc'd for  $\text{C}_{18}\text{H}_{21}\text{N}$   $[\text{M}+\text{H}]^+$ : 252.1747; found 252.1753.

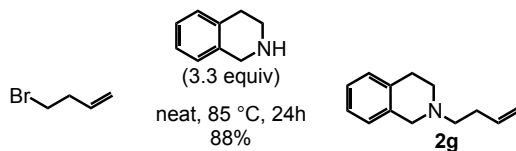

**2g:** 1,2,3,4-tetrahydroisoquinoline (2.50 mL, 20.0 mmol, 3.33 equiv) and 4-bromo-1-butene (1.02 mL, 6.80 mmol, 1 equiv) were combined at room temperature, and the resulting mixture was warmed to 85 °C in an oil bath and stirred for 24 hours. The resulting mixture was cooled to room temperature and purified by flash column chromatography on silica gel (0% to 80% diethyl ether in hexanes) to give **2g** (1.12 g, 88%) as a pale brown oil.  $^1\text{H}$  NMR (500 MHz,  $\text{CDCl}_3$ )  $\delta$  7.16–7.11 (m, 3H), 7.06–7.04 (m, 1H), 5.94–5.86 (m, 1H), 5.16–5.05 (m, 2H), 3.68 (s, 2H), 2.94 (t,  $J = 5.9$  Hz, 2H), 2.78 (t,  $J = 5.9$  Hz, 2H), 2.65–2.62 (m, 2H), 2.43–2.38 (m, 2H);  $^{13}\text{C}$  NMR (125.7 MHz,  $\text{CDCl}_3$ )  $\delta$  136.7, 134.9, 134.4, 128.8, 126.7, 126.2, 125.7, 115.8, 57.9, 56.2, 51.0, 31.9, 29.2; FTIR (thin film)  $\nu$  2919 (w), 1097 (m), 936 (m), 738 (s)  $\text{cm}^{-1}$ ; HRMS (ESI-TOF) Calc'd for  $\text{C}_{13}\text{H}_{17}\text{N}$   $[\text{M}+\text{H}]^+$ : 188.1434; found 188.1429.

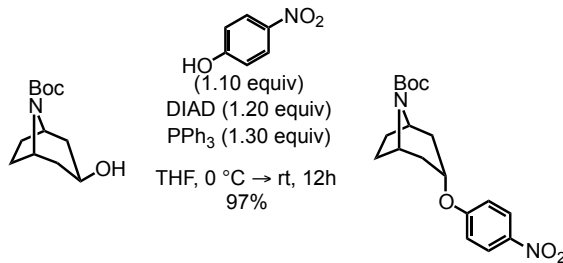

**tert-Butyl 3-(4-nitrophenoxy)-8-azabicyclo[3.2.1]octane-8-carboxylate:** Diisopropyl azodicarboxylate (DIAD, 0.877 mL, 4.48 mmol, 1.20 equiv) was added dropwise over 45 minutes via syringe to a stirred mixture of *tert*-butyl 3-hydroxy-8-azabicyclo[3.2.1]octane-8-carboxylate (850 mg, 3.73 mmol, 1 equiv), triphenylphosphine (1.27 g, 4.85 mmol, 1.30 equiv), and 4-nitrophenol (571 mg, 4.10 mmol, 1.10 equiv) in tetrahydrofuran (30 mL) at 0 °C, and the resulting mixture was warmed to room temperature. After 12 hours, the reaction mixture was concentrated under reduced pressure, and the residue was purified by flash column chromatography on silica gel (0% to 40% ethyl acetate in hexanes) to give *tert*-butyl 3-(4-nitrophenoxy)-8-azabicyclo[3.2.1]octane-8-carboxylate (1.26 g, 97%) as a white solid.  $^1\text{H}$  NMR (500 MHz,  $\text{CDCl}_3$ )  $\delta$  8.17 (d,  $J = 9.4$  Hz, 2H), 6.86 (d,  $J = 9.4$  Hz, 2H), 4.73–4.71 (m, 1H), 4.25–4.18 (m, 2H), 2.22–2.15 (m, 2H), 2.35–1.90 (m, 6H), 1.46 (s, 9H);  $^{13}\text{C}$  NMR (125.7 MHz,  $\text{CDCl}_3$ )  $\delta$  162.6, 153.5, 141.4, 126.2, 115.2, 79.6, 71.7, 52.8, 52.0, 35.0, 34.3, 28.7, 28.5, 27.8; FTIR (thin film)  $\nu$  3086 (w), 1686 (s), 1607 (m), 1591 (m), 1297 (m), 1251 (m), 1162 (m), 1033 (s), 820 (s)  $\text{cm}^{-1}$ ; HRMS (ESI-TOF) Calc'd for  $\text{C}_{18}\text{H}_{24}\text{N}_2\text{O}_5$   $[\text{M}+\text{H}]^+$ : 349.1769; found 349.1758.

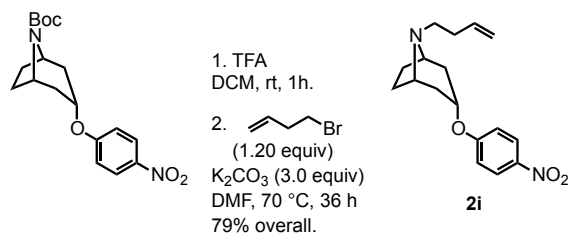

**2i:** Trifluoroacetic acid (8.4 mL) was added via syringe to a stirred solution of *tert*-butyl 3-(4-nitrophenoxy)-8-azabicyclo[3.2.1]octane-8-carboxylate (1.17 g, 3.36 mmol, 1 equiv) in dichloromethane (8.4 mL) at room temperature. After 1 hour, the reaction mixture was concentrated under reduced pressure. K<sub>2</sub>CO<sub>3</sub> (1.39 g, 10.0 mmol, 3.00 equiv) was added as a solid under a nitrogen atmosphere, and *N,N*-dimethylformamide (19 mL) and 4-bromo-1-butene (0.410 mL, 4.00 mmol, 1.20 equiv) were added sequentially via syringe. The resulting mixture was warmed to 70 °C in an oil bath. After 36 hours, the reaction mixture was cooled to room temperature, was diluted with 100 mL ethyl acetate and washed with water (5 × 100 mL). The organic layer was dried with anhydrous MgSO<sub>4</sub> and was concentrated under reduced pressure. The resulting residue was purified by flash column chromatography (25% to 100% ethyl acetate in hexanes) to give **2i** (801 mg, 79% over 2 steps) as a white solid. <sup>1</sup>H NMR (500 MHz, CDCl<sub>3</sub>) δ 8.13–8.10 (m, 2H), 6.83–6.80 (m, 2H), 5.80–5.77 (m, 1H), 5.03–4.93 (m, 2H), 4.60–4.58 (m, 1H), 3.22 (s, 2H), 2.41–2.38 (m, 2H), 2.20–2.15 (m, 4H), 1.94–1.84 (m, 6H); <sup>13</sup>C NMR (125.7 MHz, CDCl<sub>3</sub>) δ 162.7, 141.1, 136.6, 126.1, 115.7, 115.1, 71.4, 58.0, 51.8, 35.4, 33.5, 26.1; FTIR (thin film) ν 2925 (w), 1606 (m), 1590 (m), 1336 (s), 1249 (s), 1108 (m), 1037 (m), 843 (w) cm<sup>-1</sup>; HRMS (ESI-TOF) Calc'd for C<sub>17</sub>H<sub>22</sub>N<sub>2</sub>O<sub>3</sub> [M+H]<sup>+</sup>: 303.1703; found 303.1712.

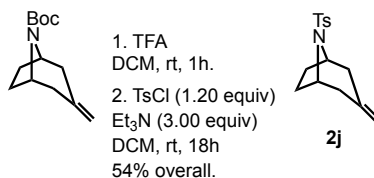

**2j:** Trifluoroacetic acid (10 mL) was added via syringe to a stirred solution of *tert*-Butyl 3-methylene-8-azabicyclo[3.2.1]octane-8-carboxylate (900 mg, 3.86 mmol, 1 equiv) in dichloromethane (10 mL) at room temperature. After 1 hour, the reaction mixture was concentrated under reduced pressure. Dichloromethane (20 mL) and triethylamine (1.63 mL, 11.57 mmol, 3.00 equiv) were added sequentially via syringe, then tosyl chloride (883 mg, 4.63 mmol, 1.20 equiv) was added as a solid under a nitrogen atmosphere. After 18 hours, aqueous HCl solution (1 M, 30 mL) was added. The organic layer was separated and was washed sequentially with saturated aqueous NaHCO<sub>3</sub> solution (30 mL) and water (30 mL). The organic layer was dried over anhydrous MgSO<sub>4</sub> and was concentrated under reduced pressure. The residue was purified by flash column chromatography on silica gel (0% to 20% ethyl acetate in hexanes) to give **2j** (578 mg, 54% over 2 steps) as a white solid. <sup>1</sup>H NMR (500 MHz, CDCl<sub>3</sub>) δ 7.75 (d, *J* = 8.3 Hz, 2H), 7.27 (d, *J* = 8.3 Hz, 2H), 4.83 (s, 2H), 4.26 (s, 2H), 2.56 (d, *J* = 13.7 Hz, 2H), 2.42 (s, 3H), 2.12 (d, *J* = 13.7 Hz, 2H), 1.43 (s, 4H); <sup>13</sup>C NMR (125.7 MHz, CDCl<sub>3</sub>) δ 143.5, 141.2, 137.5, 129.8, 127.4, 114.5, 57.5, 42.5, 28.4, 21.7; FTIR (thin film) ν 2976 (w), 1304 (s), 1252 (s), 1150 (s), 678 (s) cm<sup>-1</sup>; HRMS (ESI-TOF) Calc'd for C<sub>15</sub>H<sub>19</sub>NO<sub>2</sub>S [M+H]<sup>+</sup>: 278.1209; found 278.1216.

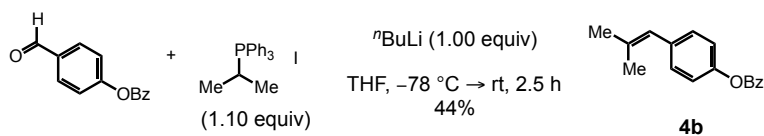

**4b**: A solution of *n*-butyllithium (2.38 M in hexanes, 3.05 mL, 7.25 mmol, 1.00 equiv) was added via syringe to a stirred suspension of isopropyltriphenylphosphonium iodide (3.45 g, 7.97 mmol, 1.10 equiv) in tetrahydrofuran (18.1 mL) at  $0\text{ }^{\circ}\text{C}$ . After 30 min, the reaction mixture was cooled to  $-78\text{ }^{\circ}\text{C}$ . After 15 min, a solution of 4-formylphenyl benzoate<sup>4</sup> (1.64 g, 7.25 mmol, 1 equiv) in tetrahydrofuran (18.1 mL) was added via cannula. The resulting mixture was allowed to warm to  $-50\text{ }^{\circ}\text{C}$  over 90 min and then warmed to room temperature. After 1 h, pH 7 buffer (20 mL) was added followed by diethyl ether (100 mL). The organic layer was washed sequentially with water (100 mL) and brine (100 mL), was dried over anhydrous  $\text{MgSO}_4$ , and was concentrated under reduced pressure. The residue was purified by flash column chromatography on silica gel (0 to 2% ethyl acetate in hexanes) to give 4-(2-methylprop-1-en-1-yl)phenyl benzoate (**4b**, 805 mg, 44%) as a white solid.  $^1\text{H NMR}$  (500 MHz,  $\text{CDCl}_3$ )  $\delta$  8.22 (d,  $J = 8.3$  Hz, 2H), 7.64 (t,  $J = 7.6$  Hz, 1H), 7.52 (t,  $J = 7.8$  Hz, 2H), 7.29 (d,  $J = 8.3$  Hz, 2H), 7.18 (d,  $J = 8.3$  Hz, 2H), 6.29 (s, 1H), 1.93 (d,  $J = 1.0$  Hz, 3H), 1.89 (d,  $J = 1.0$  Hz, 3H);  $^{13}\text{C NMR}$  (125.7 MHz,  $\text{CDCl}_3$ )  $\delta$  165.5, 149.0, 136.7, 136.0, 133.7, 130.4, 129.9, 129.9, 128.7, 124.5, 121.4, 27.0, 19.6; FTIR (thin film)  $\nu$  2978 (w), 1728 (s), 1503 (m), 1451 (m), 1264 (s), 1201 (s), 1064 (m)  $\text{cm}^{-1}$ ; HRMS (ESI-TOF) Calc'd for  $\text{C}_{17}\text{H}_{17}\text{O}_2$   $[\text{M}+\text{H}]^+$ : 253.1223; found 253.1227.

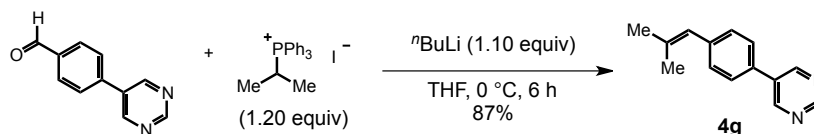

**4g**: A solution of *n*-butyllithium in (2.50 M in hexanes, 2.40 mL, 5.97 mmol, 1.10 equiv) was added via syringe to a stirred suspension of isopropyltriphenylphosphonium iodide (2.82 g, 6.52 mmol, 1.20 equiv) in tetrahydrofuran (20 mL) at  $0\text{ }^{\circ}\text{C}$ . After 1 hour, a solution of 4-(pyrimidin-5-yl)benzaldehyde (1.00 g, 5.42 mmol, 1 equiv) in tetrahydrofuran (5 mL) was added dropwise via cannula. After 5 hours, hexanes (50 mL) was added. The resulting heterogeneous mixture was filtered, and the filtrate was diluted with ethyl acetate (50 mL) and washed with water (50 mL). The organic layer was separated, and the aqueous layer was washed with ethyl acetate (50 mL). The combined organic layers were dried over anhydrous  $\text{MgSO}_4$  and were concentrated under reduced pressure. The residue was purified by flash column chromatography on silica gel (0 to 80% ethyl acetate in hexanes) to give **4g** (991 mg, 87%) as a white solid.  $^1\text{H NMR}$  (500 MHz,  $\text{CDCl}_3$ )  $\delta$  9.15 (s, 1H), 8.92 (s, 2H), 7.50 (d,  $J = 7.8$  Hz, 2H), 7.33 (d,  $J = 7.8$  Hz, 2H), 6.27 (s, 1H), 1.91 (s, 3H), 1.88 (s, 3H);  $^{13}\text{C NMR}$  (125.7 MHz,  $\text{CDCl}_3$ )  $\delta$  157.4, 154.8, 139.7, 137.1, 134.2, 131.5, 129.8, 126.6, 124.4, 27.1, 19.7; FTIR (thin film)  $\nu$  3017 (w), 1413 (m), 853 (m), 731 (m), 561 (m)  $\text{cm}^{-1}$ ; HRMS (ESI-TOF) Calc'd for  $\text{C}_{14}\text{H}_{14}\text{N}_2$   $[\text{M}+\text{H}]^+$ : 211.1227; found 211.1230.

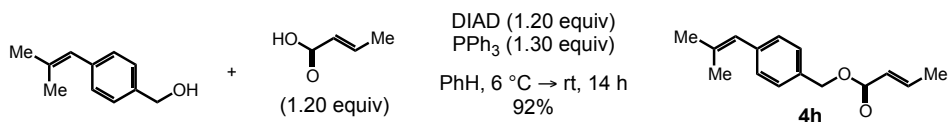

**4h**: Diisopropyl azodicarboxylate (DIAD, 2.45 mL, 12.6 mmol, 1.20 equiv) was added via syringe to a stirred solution of (4-(2-methylprop-1-en-1-yl)phenyl)methanol<sup>5</sup> (1.70 g, 10.5 mmol, 1 equiv), crotonic acid (1.08 g, 12.6 mmol, 1.20 equiv), and triphenylphosphine (3.57 g, 13.6 mmol, 1.30 equiv) in benzene (52.4 mL) at  $6\text{ }^{\circ}\text{C}$ , and the resulting mixture was warmed to room temperature. After 14 h, the reaction mixture was concentrated under reduced pressure. The residue was purified by flash column chromatography on silica gel (0 to 1% ethyl acetate in

hexanes) to give **4h** (2.21 g, 92%) as a colorless oil. <sup>1</sup>H NMR (500 MHz, CDCl<sub>3</sub>) δ 7.33 (d, *J* = 8.3 Hz, 2H), 7.23 (d, *J* = 8.3 Hz, 2H), 7.03 (qd, *J* = 6.8, 15.6 Hz, 1H), 6.27 (s, 1H), 5.91 (qd, *J* = 2.0, 15.6 Hz, 1H), 5.16 (s, 2H), 1.92 (d, *J* = 1.5 Hz, 3H), 1.88 (dd, *J* = 6.8, 2.0 Hz, 3H), 1.87 (d, *J* = 1.2 Hz, 3H); <sup>13</sup>C NMR (125.7 MHz, CDCl<sub>3</sub>) δ 166.5, 145.2, 138.8, 136.0, 133.7, 129.0, 128.2, 124.9, 122.7, 66.0, 27.0, 19.5, 18.1; FTIR (thin film) ν 2968 (w), 2911 (w), 1718 (s), 1657 (m), 1442 (m), 1260 (m), 1171 (s), 1012 (m) cm<sup>-1</sup>; HRMS (ESI-TOF) Calc'd for C<sub>15</sub>H<sub>19</sub>O<sub>2</sub> [M+H]<sup>+</sup>: 248.1645; found 248.1642.

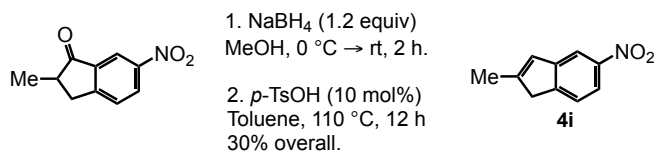

**4i**: NaBH<sub>4</sub> (310 mg, 8.16 mmol, 1.2 equiv) was added as a solid under a nitrogen atmosphere in portions over 20 minutes to a stirred solution of 2-methyl-6-nitro-2,3-dihydro-1*H*-inden-1-one<sup>6</sup> (1.30 g, 6.80 mmol, 1 equiv) in methanol (20 mL) at 0 °C, and the resulting mixture was allowed to warm to room temperature. After 2 hours, saturated aqueous NH<sub>4</sub>Cl solution (50 mL) was added, and the mixture was extracted with dichloromethane (3 × 100 mL). The combined organic layers were dried over anhydrous MgSO<sub>4</sub> and were concentrated under reduced pressure to give a pale green solid. To this solid was added *p*-toluenesulfonic acid monohydrate (129 mg, 0.680 mmol, 0.100 equiv) and toluene (20 mL). The resulting mixture was warmed to 110 °C in an oil bath and stirred for 12 hours. The resulting mixture was cooled to room temperature and saturated aqueous NaHCO<sub>3</sub> solution (50 mL) was added. The aqueous layer was extracted with ethyl acetate (3 × 100 mL), and the combined organic layers were dried over anhydrous MgSO<sub>4</sub> and were concentrated under reduced pressure. The residue was purified by flash column chromatography (0 to 20% ether in hexanes) to give a mixture of 2-methyl-5-nitro-1*H*-indene (**4i**) and 2-methyl-6-nitro-1*H*-indene. This mixture was recrystallized from hexanes to give pure 2-methyl-5-nitro-1*H*-indene (**4i**, 362 mg, 30% over 2 steps) as pale yellow needles. <sup>1</sup>H NMR (500 MHz, CDCl<sub>3</sub>) δ 8.02 (d, *J* = 2.0 Hz, 1H), 7.99–7.97 (m, 1H), 7.43 (d, *J* = 7.8 Hz, 1H), 6.53 (s, 1H), 3.38 (s, 2H), 2.19 (s, 3H); <sup>13</sup>C NMR (125.7 MHz, CDCl<sub>3</sub>) δ 150.5, 149.8, 147.6, 147.3, 126.6, 123.5, 119.3, 114.5, 43.0, 17.0; FTIR (thin film) ν 1606 (m), 1345 (s), 823 (s), 734 (s), 416 (m) cm<sup>-1</sup>; HRMS (ESI-TOF) Calc'd for C<sub>10</sub>H<sub>9</sub>NO<sub>2</sub> [M+H]<sup>+</sup>: 175.0706; found 176.0714.

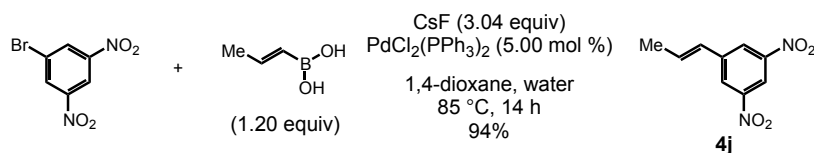

**4j**: Bis(triphenylphosphine)palladium(II) dichloride (284 mg, 405 μmol, 5.00 mol %) was added as a solid under a nitrogen atmosphere to a vigorously stirred biphasic mixture of 1-bromo-3,5-dinitrobenzene<sup>7</sup> (2.00 g, 8.10 mmol, 1 equiv), (*E*)-prop-1-en-1-ylboronic acid (835 mg, 9.72 mmol, 1.20 equiv), and CsF (3.74 g, 24.6 mmol, 3.04 equiv) in 1,4-dioxane (45.4 mL) and water (22.7 mL) at room temperature. The resulting mixture was warmed to 85 °C. After 14 h, the reaction mixture was cooled to room temperature, and ethyl acetate (200 mL) was added. The organic layer was washed with brine (150 mL), was dried over anhydrous Na<sub>2</sub>SO<sub>4</sub>, was filtered, and was concentrated under reduced pressure. The residue was purified by flash column chromatography on silica gel (0 to 15% dichloromethane in hexanes) to give **4j** (1.58 g, 94%) as a yellow solid. <sup>1</sup>H NMR (500 MHz, CDCl<sub>3</sub>) δ 8.84 (d, *J* = 2.0 Hz, 1H), 8.46 (d, *J* = 2.0 Hz, 2H), 6.60 (qd, *J* = 6.4, 15.7 Hz, 1H), 6.53 (d, *J* = 15.7 Hz, 1H), 2.00 (dd, *J* = 6.4, 1.5 Hz, 3H); <sup>13</sup>C NMR (125.7 MHz, CDCl<sub>3</sub>) δ 149.0, 141.9, 133.3, 127.6, 125.6, 116.5, 18.8; FTIR (thin film) ν

3104 (w), 2916 (w), 1540 (s), 1341 (s), 1292 (m), 1073 (w), 974 (m)  $\text{cm}^{-1}$ ; HRMS (ESI-TOF) Calc'd for  $\text{C}_9\text{H}_9\text{N}_2\text{O}_4$   $[\text{M}+\text{H}]^+$ : 209.0557; found 209.0547.

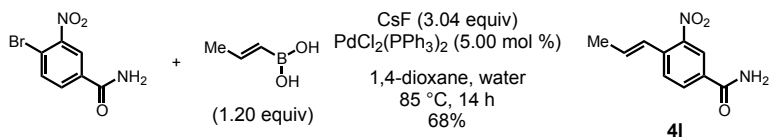

**4l**: Bis(triphenylphosphine)palladium(II) dichloride (274 mg, 391  $\mu\text{mol}$ , 5.00 mol %) was added as a solid under a nitrogen atmosphere to a vigorously stirred biphasic mixture of 4-bromo-3-nitrobenzamide<sup>8</sup> (1.91 g, 7.81 mmol, 1 equiv), (*E*)-prop-1-en-1-ylboronic acid (805 mg, 9.38 mmol, 1.20 equiv), and CsF (3.61 g, 23.8 mmol, 3.04 equiv) in 1,4-dioxane (43.8 mL) and water (21.9 mL) at room temperature. The resulting mixture was warmed to 85 °C. After 14 h, the reaction mixture was cooled to room temperature, and ethyl acetate (200 mL) was added. The organic layer was washed with brine (150 mL), was dried over anhydrous  $\text{Na}_2\text{SO}_4$ , was filtered, and was concentrated under reduced pressure. The residue was purified by flash column chromatography on silica gel (0 to 70% ethyl acetate in hexanes) to give **4l** (1.10 g, 68%) as a tan solid.  $^1\text{H}$  NMR (500 MHz, acetone- $d_6$ )  $\delta$  8.40 (d,  $J = 2.0$  Hz, 1H), 8.16 (dd,  $J = 8.3, 2.0$  Hz, 1H), 7.83 (d,  $J = 8.3$  Hz, 1H), 7.84–7.68 (br-s, 1H), 7.14–6.91 (br-s, 1H), 6.79 (qd,  $J = 2.0, 15.6$  Hz, 1H), 6.52 (qd,  $J = 6.8, 15.6$  Hz, 1H), 1.94 (d,  $J = 2.0, 6.8$  Hz, 3H);  $^{13}\text{C}$  NMR (125.7 MHz, acetone- $d_6$ )  $\delta$  166.8, 148.6, 135.9, 134.7, 134.3, 132.4, 129.1, 125.9, 124.3, 19.1; FTIR (thin film)  $\nu$  3353 (br-m), 3196 (br-m), 2972 (w), 2912 (w), 1660 (s), 1617 (s), 1527 (s), 1445 (w), 1405 (m), 1344 (m), 958 (m)  $\text{cm}^{-1}$ ; HRMS (ESI-TOF) Calc'd for  $\text{C}_{10}\text{H}_{11}\text{N}_2\text{O}_3$   $[\text{M}+\text{H}]^+$ : 207.0764; found 207.0755.

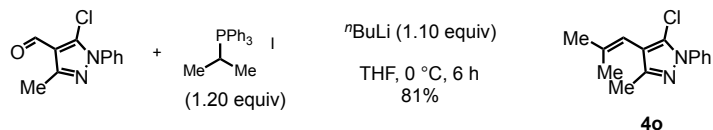

**4o**: A solution of *n*-butyllithium (2.50 M in hexanes, 2.00 mL, 4.98 mmol, 1.10 equiv) was added dropwise via syringe to a stirred suspension of isopropyltriphenylphosphonium iodide (2.35 g, 5.44 mmol, 1.20 equiv) in tetrahydrofuran (18 mL) at 0 °C. After 1 h, a solution of 5-chloro-3-methyl-1-phenyl-1*H*-pyrazole-4-carbaldehyde (1.00 g, 4.53 mmol, 1 equiv) in tetrahydrofuran (5 mL) was added dropwise via cannula. After 5 hours, hexanes (50 mL) was added. The resulting heterogeneous mixture was filtered, and the filtrate was diluted with ethyl acetate (50 mL) and washed with water (50 mL). The aqueous layer was extracted with ethyl acetate (50 mL), and the combined organic layers were dried over anhydrous  $\text{MgSO}_4$  and were concentrated under reduced pressure. The residue was purified by flash column chromatography on silica gel (0% to 20% ethyl acetate in hexanes) to give **4o** (906 mg, 81%) as a colorless oil.  $^1\text{H}$  NMR (500 MHz,  $\text{CDCl}_3$ )  $\delta$  7.57 (d,  $J = 8.3$  Hz, 2H), 7.46–7.43 (m, 2H), 7.36–7.32 (m, 1H), 5.84 (s, 1H), 2.23 (s, 3H), 1.92 (s, 3H), 1.69 (s, 3H);  $^{13}\text{C}$  NMR (125.7 MHz,  $\text{CDCl}_3$ )  $\delta$  148.9, 139.5, 138.7, 129.0, 127.8, 124.0, 124.8, 116.9, 113.0, 25.8, 20.2, 13.4; FTIR (thin film)  $\nu$  2970 (w), 1500 (s), 1719 (s), 1358 (m), 992 (m), 758 (s), 692 (s)  $\text{cm}^{-1}$ ; HRMS (ESI-TOF) Calc'd for  $\text{C}_{14}\text{H}_{15}\text{ClN}_2$   $[\text{M}+\text{H}]^+$ : 247.0997; found 247.1000.

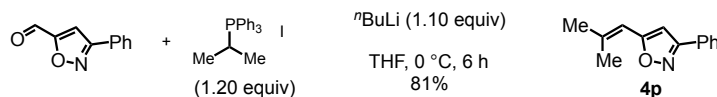

**4p**: A solution of *n*-butyllithium (2.50 M in hexanes, 2.54 mL, 6.35 mmol, 1.10 equiv) was added dropwise via syringe to a stirred suspension of isopropyltriphenylphosphonium iodide (3.00 g, 6.93 mmol, 1.20 equiv) in tetrahydrofuran (21 mL) at 0 °C. After 1 hour, a solution of 3-phenylisoxazole-5-carbaldehyde (1.00 g, 5.77 mmol, 1 equiv) in tetrahydrofuran (5 mL) was



added dropwise via cannula. After 5 hours, hexanes (50 mL) was added. The resulting heterogeneous mixture was filtered, and the filtrate was diluted with ethyl acetate (50 mL) and washed with water (50 mL). The aqueous layer was extracted with ethyl acetate (50 mL), and the combined organic layers were dried over anhydrous  $\text{MgSO}_4$  and were concentrated under reduced pressure. The residue was purified by flash column chromatography on silica gel (0% to 20% ethyl acetate in hexanes) to give **4p** (936 mg, 81%) as a white solid.  $^1\text{H}$  NMR (500 MHz,  $\text{CDCl}_3$ )  $\delta$  7.83–7.81 (m, 2H), 7.44–7.41 (m, 3H), 6.36 (s, 1H), 6.19 (s, 1H), 2.07 (s, 3H), 1.95 (s, 3H);  $^{13}\text{C}$  NMR (125.7 MHz,  $\text{CDCl}_3$ )  $\delta$  169.5, 162.2, 144.1, 129.8, 129.5, 128.9, 126.8, 111.8, 99.5, 27.3, 20.7; FTIR (thin film)  $\nu$  2912 (w), 2149 (m), 1403 (s), 761 (s), 691 (m)  $\text{cm}^{-1}$ ; HRMS (ESI-TOF) Calc'd for  $\text{C}_{13}\text{H}_{13}\text{NO}$   $[\text{M}+\text{H}]^+$ : 200.1070; found 200.1066.

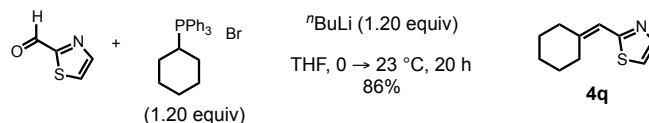

**4q:** A solution of *n*-butyllithium (2.41 M in hexanes, 2.20 mL, 5.30 mmol, 1.20 equiv) was added via syringe to a stirred suspension of cyclohexyltriphenylphosphonium bromide (2.26 g, 5.30 mmol, 1.20 equiv) in tetrahydrofuran (22.1 mL) at 0  $^\circ\text{C}$ . After 30 min, thiazole 2-carbaldehyde (388  $\mu\text{L}$ , 4.42 mmol, 1 equiv) was added via syringe, and the resulting mixture was warmed to room temperature. After 20 h, saturated aqueous  $\text{NH}_4\text{Cl}$  solution (10 mL) and diethyl ether (100 mL) were added sequentially. The organic layer was washed sequentially with water (100 mL) and brine (100 mL), was dried over anhydrous  $\text{MgSO}_4$ , and was concentrated under reduced pressure. The residue was purified by flash column chromatography on silica gel (0 to 7% ethyl acetate in hexanes) to give **4q** (678 mg, 86%) as a yellow oil.  $^1\text{H}$  NMR (500 MHz,  $\text{CDCl}_3$ )  $\delta$  7.73 (d,  $J$  = 3.4 Hz, 1H), 7.18 (d,  $J$  = 3.4 Hz, 1H), 6.41 (s, 1H), 2.78 (t,  $J$  = 5.6 Hz, 2H), 2.28 (t,  $J$  = 6.1 Hz, 2H), 1.70–1.58 (m, 6H);  $^{13}\text{C}$  NMR (125.7 MHz,  $\text{CDCl}_3$ )  $\delta$  165.9, 150.3, 142.6, 117.6, 115.6, 38.0, 30.7, 28.7, 27.6, 26.5; FTIR (thin film)  $\nu$  2925 (m), 2852 (w), 1639 (m), 1489 (m), 1446 (m), 1140 (m), 1070 (s), 800 (m)  $\text{cm}^{-1}$ ; HRMS (ESI-TOF) Calc'd for  $\text{C}_{10}\text{H}_{14}\text{NS}$   $[\text{M}+\text{H}]^+$ : 180.0841; found 180.0846.

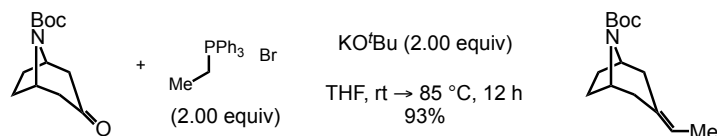

***tert*-Butyl 3-ethylidene-8-azabicyclo[3.2.1]octane-8-carboxylate:** Potassium *tert*-butoxide (2.00 g, 17.7 mmol, 2.00 equiv) was added as a solid under a nitrogen atmosphere to a stirred suspensions of ethyltriphenylphosphonium bromide (5.70 g, 17.7 mmol, 2.00 equiv) in tetrahydrofuran (80 mL) at room temperature. After 2 hours, a solution of *N*-Boc nortropinone (2.00 g, 8.87 mmol, 1 equiv) in tetrahydrofuran (10 mL) was added dropwise via cannula, and the resulting mixture has warmed to 85  $^\circ\text{C}$  in an oil bath. After 12 hours, the reaction mixture was cooled to room temperature, hexanes (100 mL) was added, and the resulting suspension was filtered. The filtrate was diluted with ethyl acetate (100 mL) and washed with saturated aqueous  $\text{NH}_4\text{Cl}$  solution (100 mL). The organic layer was separated, was washed with water (100 mL), was dried with anhydrous  $\text{MgSO}_4$ , and was concentrated under reduced pressure. The residue was purified by flash column chromatography (0% to 40% ethyl acetate in hexanes) to give *tert*-butyl 3-ethylidene-8-azabicyclo[3.2.1]octane-8-carboxylate (1.95 g, 93%) as a white solid.  $^1\text{H}$  NMR (500 MHz,  $\text{CDCl}_3$ )  $\delta$  5.36–5.32 (m, 1H), 4.27–4.13 (m, 2H), 2.51–2.37 (m, 1H), 2.35 (d,  $J$  = 14.2 Hz, 1H), 2.19–2.09 (m, 1H), 1.93 (d,  $J$  = 13.7, 1H), 1.92–1.82 (m, 2H), 1.58–1.33 (m, 14H);  $^{13}\text{C}$

NMR (125.7 MHz, CDCl<sub>3</sub>) δ153.8, 132.6, 122.1, 79.3, 54.8, 54.4, 54.2, 53.7, 42.5, 41.8, 34.8, 34.1, 29.0, 28.7, 28.5, 28.3, 27.9, 13.0; FTIR (thin film) ν 2974 (w), 1693 (s), 1390 (s), 1170 (s), 1123 (m) cm<sup>-1</sup>; HRMS (ESI-TOF) Calc'd for C<sub>14</sub>H<sub>23</sub>NO<sub>2</sub> [M+Na]<sup>+</sup>: 260.1621; found 260.1617.

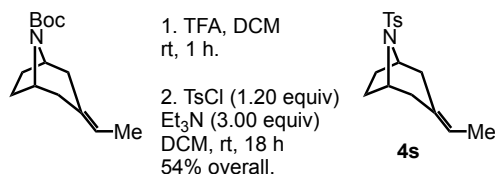

**4s:** Trifluoroacetic acid (10 mL) was added via syringe to a stirred solution of *tert*-butyl 3-ethylidene-8-azabicyclo[3.2.1]octane-8-carboxylate (800 mg, 3.37 mmol, 1 equiv) in dichloromethane (10 mL) at room temperature. After 1 hour, the reaction mixture was concentrated under reduced pressure. Dichloromethane (14 mL) and triethylamine (1.40 mL, 10.1 mmol, 3.00 equiv) were added sequentially via syringe, then tosyl chloride (1.28 mg, 6.74 mmol, 2.00 equiv) was added as a solid under a nitrogen atmosphere. After 18 hours, aqueous HCl solution (1 M, 30 mL) was added. The organic layer was separated and was washed sequentially with saturated aqueous NaHCO<sub>3</sub> solution (30 mL) and water (30 mL). The organic layer was dried over anhydrous MgSO<sub>4</sub> and was concentrated under reduced pressure. The residue was purified by flash column chromatography (0% to 20% ethyl acetate in hexanes) to give **4s** (531 mg, 54% over 2 steps) as a white solid. <sup>1</sup>H NMR (500 MHz, CDCl<sub>3</sub>) δ 7.76 (d, *J* = 8.3 Hz, 2H), 7.27 (d, *J* = 8.3 Hz, 2H), 5.34 (q, *J* = 6.8 Hz, 1H), 4.28–4.22 (m, 2H), 2.58 (d, *J* = 13.7 Hz, 1H), 2.44–2.41 (m, 4H), 2.22 (d, *J* = 13.7 Hz, 1H), 2.01 (d, *J* = 13.7, 1H), 1.56–1.54 (m, 3H), 1.42–1.31 (m, 4H); <sup>13</sup>C NMR (125.7 MHz, CDCl<sub>3</sub>) δ143.4, 137.6, 131.3, 129.7, 127.5, 123.1, 57.7, 57.2, 43.7, 36.1, 28.7, 28.3, 21.7, 13.0; FTIR (thin film) ν 2973 (w), 1340 (s), 1160 (s), 1096 (m), 709 (s) cm<sup>-1</sup>; HRMS (ESI-TOF) Calc'd for C<sub>16</sub>H<sub>21</sub>NO<sub>2</sub>S [M+H]<sup>+</sup>: 292.1366; found 292.1369.

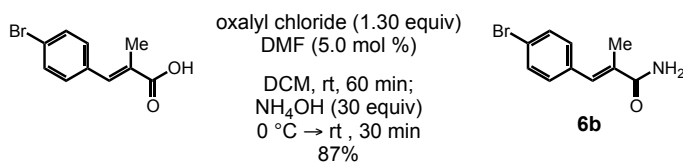

**6b:** *N,N*-Dimethylformamide (16 μL, 210 μmol, 5.0 mol %) was added via syringe to a stirred solution of (*E*)-3-(4-bromophenyl)-2-methylacrylic acid<sup>9</sup> (1.00 g, 4.15 mmol, 1 equiv) and oxalyl chloride (472 μL, 5.39 mmol, 1.30 equiv) in dichloromethane (13.8 mL) at room temperature. After 60 minutes, the resulting mixture was concentrated under reduced pressure. Dichloromethane (13.8 mL) was added via syringe, and the resulting mixture was transferred via cannula to a vigorously stirred aqueous solution of ammonia (30% weight/weight, 7.9 mL, 120 mmol, 30 equiv) at 0 °C. The resulting biphasic mixture was warmed to room temperature. After 30 minutes, diethyl ether (200 mL) was added. The organic layer was washed with (2 × 200 mL), was dried over anhydrous MgSO<sub>4</sub>, was filtered, and was concentrated under reduced pressure. The residue was purified by flash column chromatography on silica gel (20 to 100% ethyl acetate in hexanes) to give **6b** (867 mg, 87%) as a light tan solid. <sup>1</sup>H NMR (500 MHz, DMSO-*d*<sub>6</sub>) δ 7.59 (d, *J* = 7.8 Hz, 2H), 7.59–7.50 (br-s, 1H), 7.33 (d, *J* = 8.3 Hz, 2H), 7.22 (s, 1H), 7.18–7.06 (br-s, 1H), 1.97 (s, 3H); <sup>13</sup>C NMR (125.7 MHz, DMSO-*d*<sub>6</sub>) δ 170.3, 135.4, 133.1, 131.4, 131.3, 131.3, 120.9, 14.2; FTIR (thin film) ν 3358 (br-m), 3175 (br-m), 1653 (s), 1609 (m), 1484 (m), 1410 (m), 1073 (m), 1008 (m) cm<sup>-1</sup>; HRMS (ESI-TOF) Calc'd for C<sub>10</sub>H<sub>11</sub>BrNO [M+H]<sup>+</sup>: 240.0019; found 240.0024.

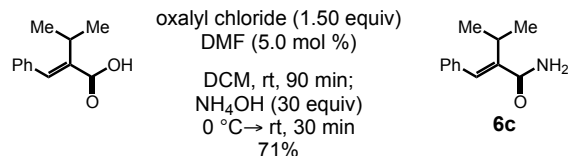

**6c:** *N,N*-dimethylformamide (20  $\mu$ L, 260  $\mu$ mol, 5.0 mol %) was added via syringe to a stirred solution of (*E*)-2-benzylidene-3-methylbutanoic acid<sup>10</sup> (1.00 g, 5.26 mmol, 1 equiv) and oxalyl chloride (598  $\mu$ L, 6.83 mmol, 1.50 equiv) in dichloromethane (17.5 mL) at room temperature. After 90 minutes, the resulting mixture was concentrated under reduced pressure. Dichloromethane (17.5 mL) was added via syringe, and the resulting mixture was transferred via cannula to a vigorously stirred aqueous solution of ammonia (30% weight/weight, 10 mL, 160 mmol, 30 equiv) at 0 °C. The resulting biphasic mixture was warmed to room temperature. After 30 minutes, diethyl ether (200 mL) was added. The organic layer was washed with (2  $\times$  200 mL), was dried over anhydrous MgSO<sub>4</sub>, was filtered, and was concentrated under reduced pressure. The residue was purified by flash column chromatography on silica gel (0 to 70% ethyl acetate in hexanes) to give **6c** (707 mg, 71%) as a white solid. <sup>1</sup>H NMR (500 MHz, CDCl<sub>3</sub>)  $\delta$  7.36 (t, *J* = 7.3 Hz, 2H), 7.31–7.26 (m, 3H), 6.90 (s, 1H), 6.48–6.02 (br-s, 1H), 6.02–5.55 (br-s, 1H), 3.09 (sep, *J* = 6.8 Hz, 1H), 1.26 (d, *J* = 6.8 Hz, 6H); <sup>13</sup>C NMR (125.7 MHz, CDCl<sub>3</sub>)  $\delta$  173.1, 144.6, 136.0, 130.5, 128.9, 128.6, 127.7, 28.1, 21.7; FTIR (thin film)  $\nu$  3399 (br-m), 3169 (br-m), 2983 (w), 2966 (w), 1645 (s), 1608 (s), 1449 (m), 1405 (m), 1077 (m) cm<sup>-1</sup>; HRMS (ESI-TOF) Calc'd for C<sub>12</sub>H<sub>16</sub>NO [M+H]<sup>+</sup>: 190.1226; found 190.1227.

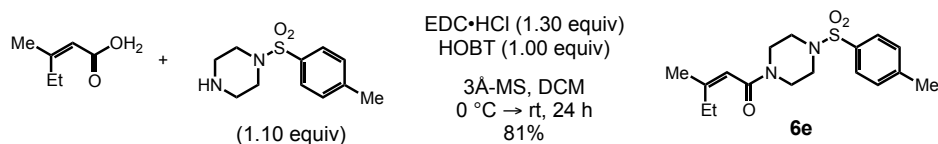

**6e:** 1-Ethyl-3-(3-dimethylaminopropyl) carbodiimide hydrogen chloride (EDC·HCl, 2.18 g, 11.4 mmol, 1.30 equiv) was added as a solid under a nitrogen atmosphere to a stirred mixture of (*Z*)-3-methylpent-2-enoic acid<sup>11</sup> (1.00 mg, 8.76 mmol, 1 equiv), 1-tosylpiperazine (2.32 g, 9.64 mmol, 1.10 equiv), *N*-hydroxybenzotriazole hydrate (HOBT, 1.34 g, 8.76 mmol, 1.00 equiv), and powdered 3 Å molecular sieves (1.0 g) in dichloromethane (50.0 mL) at 0 °C. The resulting mixture was warmed to room temperature. After 24 hours, diethyl ether (200 mL) was added. The organic layer was washed sequentially with aqueous HCl solution (1 M, 2  $\times$  100 mL), saturated aqueous NaHCO<sub>3</sub> solution (100 mL), and brine (100 mL); was dried over anhydrous MgSO<sub>4</sub>; was filtered; and was concentrated under reduced pressure. The residue was purified by flash column chromatography on silica gel (0 to 30% ethyl acetate in hexanes) to give **6e** (2.39 g, 81%) as a white solid. The olefin geometry was assigned using additional information from a NOESY experiment. <sup>1</sup>H NMR (400 MHz, CDCl<sub>3</sub>)  $\delta$  7.62 (d, *J* = 8.2 Hz, 2H), 7.33 (d, *J* = 8.2 Hz, 2H), 5.63 (s, 1H), 3.76–3.67 (m, 2H), 3.62–3.53 (m, 2H), 3.02–2.91 (m, 4H), 2.44 (s, 3H), 2.22 (q, *J* = 7.4 Hz, 2H), 1.79 (s, 3H), 0.99 (t, *J* = 7.4 Hz, 3H); <sup>13</sup>C NMR (125.7 MHz, CDCl<sub>3</sub>)  $\delta$  167.0, 152.5, 144.2, 132.4, 129.9, 127.9, 116.8, 46.4, 46.0, 45.7, 40.6, 27.0, 23.2, 21.7, 12.6; FTIR (thin film)  $\nu$  2972 (w), 2918 (w), 1624 (s), 1453 (m), 1424 (m), 1346 (s), 1234 (s), 1117 (m), 924 (m) cm<sup>-1</sup>; HRMS (ESI-TOF) Calc'd for C<sub>17</sub>H<sub>25</sub>N<sub>2</sub>O<sub>3</sub>S [M+H]<sup>+</sup>: 337.1580; found 337.1594.

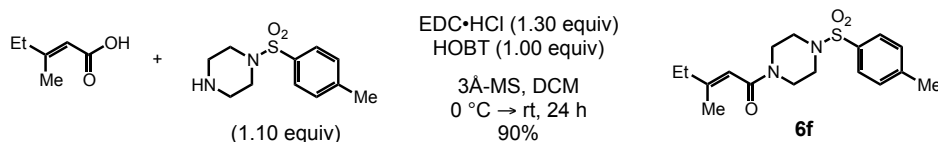

**6f:** 1-Ethyl-3-(3-dimethylaminopropyl) carbodiimide hydrogen chloride (EDC·HCl, 1.09 g, 5.69 mmol, 1.30 equiv) was added as a solid under a nitrogen atmosphere to a stirred mixture of (*E*)-3-

methylpent-2-enoic acid<sup>12</sup> (500 mg, 4.38 mmol, 1 equiv), 1-tosylpiperazine (1.16 g, 4.82 mmol, 1.10 equiv), *N*-hydroxybenzotriazole hydrate (HOBT, 671 mg, 4.38 mmol, 1.00 equiv), and powdered 3 Å molecular sieves (500 mg) in dichloromethane (21.9 mL) at 0 °C. The resulting mixture was warmed to room temperature. After 24 hours, diethyl ether (130 mL) was added. The organic layer was washed sequentially with aqueous HCl solution (1 M, 2 × 50 mL), saturated aqueous NaHCO<sub>3</sub> solution (50 mL), and brine (50 mL); was dried over anhydrous MgSO<sub>4</sub>; was filtered; and was concentrated under reduced pressure. The residue was purified by flash column chromatography on silica gel (0 to 30% ethyl acetate in hexanes) to give **6f** (1.33 g, 90%) as a white solid. The olefin geometry was assigned using additional information from a NOESY experiment. <sup>1</sup>H NMR (500 MHz, CDCl<sub>3</sub>) δ 7.62 (d, *J* = 7.8 Hz, 2H), 7.34 (d, *J* = 7.8 Hz, 2H), 5.65 (s, 1H), 3.79–3.67 (m, 2H), 3.64–3.53 (m, 2H), 3.04–2.91 (m, 4H), 2.44 (s, 3H), 2.09 (q, *J* = 7.6 Hz, 2H), 1.81 (s, 3H), 1.03 (t, *J* = 7.6 Hz, 3H); <sup>13</sup>C NMR (125.7 MHz, CDCl<sub>3</sub>) δ 167.5, 152.4, 144.2, 132.5, 130.0, 127.9, 115.5, 46.5, 46.1, 45.7, 40.7, 32.5, 21.7, 18.8, 12.1; FTIR (thin film) ν 2970 (w), 2913 (w), 1624 (s), 1426 (m), 1347 (s), 1239 (m), 1164 (s), 1056 (m), 725 (m) cm<sup>-1</sup>; HRMS (ESI-TOF) Calc'd for C<sub>17</sub>H<sub>25</sub>N<sub>2</sub>O<sub>3</sub>S [M+H]<sup>+</sup>: 337.1580; found 337.1594.

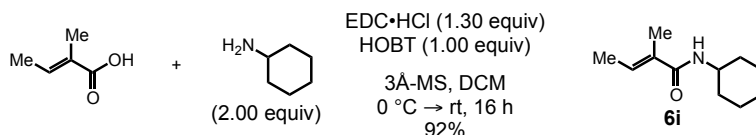

**6i**: 1-Ethyl-3-(3-dimethylaminopropyl) carbodiimide hydrogen chloride (EDC•HCl, 2.45 g, 13.0 mmol, 1.30 equiv) was added as a solid under a nitrogen atmosphere to a stirred mixture of tiglic acid (1.00 g, 9.99 mmol, 1 equiv), cyclohexylamine (2.29 mL, 20.0 mmol, 2.00 equiv), *N*-hydroxybenzotriazole hydrate (HOBT, 1.53 g, 10.0 mmol, 1.00 equiv), and powdered 3 Å molecular sieves (500 mg) in dichloromethane (33.3 mL) at 0 °C. The resulting mixture was warmed to room temperature. After 16 hours, diethyl ether (250 mL) was added. The organic layer was washed sequentially with aqueous HCl solution (1 M, 2 × 100 mL), saturated aqueous NaHCO<sub>3</sub> solution (100 mL), and brine (100 mL); was dried over anhydrous MgSO<sub>4</sub>; was filtered; and was concentrated under reduced pressure to give **6i** (1.66 g, 91%) as a white solid. <sup>1</sup>H NMR (500 MHz, CDCl<sub>3</sub>) δ 6.31 (q, *J* = 6.8 Hz, 1H), 5.75–5.55 (br-s, 1H), 3.81–3.68 (m, 1H), 1.93–1.82 (m, 2H), 1.77 (s, 3H), 1.67 (d, *J* = 6.8 Hz, 3H), 1.67–1.61 (m, 2H), 1.60–1.51 (m, 1H), 1.39–1.25 (m, 2H), 1.20–1.03 (m, 3H); <sup>13</sup>C NMR (125.7 MHz, CDCl<sub>3</sub>) δ 168.6, 132.3, 129.9, 48.2, 33.2, 25.7, 25.0, 13.9, 12.5; FTIR (thin film) ν 3303 (br-m), 2928 (w), 2853 (w), 1660 (m), 1613 (s), 1527 (s), 1449 (m), 1318 (m), 1080 (m) cm<sup>-1</sup>; HRMS (ESI-TOF) Calc'd for C<sub>11</sub>H<sub>20</sub>NO [M+H]<sup>+</sup>: 182.1539; found 182.1542.

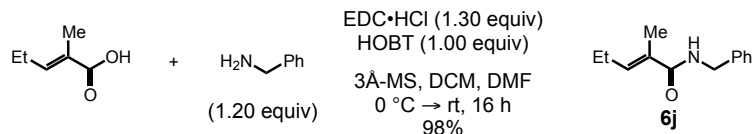

**6j**: 1-Ethyl-3-(3-dimethylaminopropyl) carbodiimide hydrogen chloride (EDC•HCl, 2.18 g, 11.4 mmol, 1.30 equiv) was added as a solid under a nitrogen atmosphere to a stirred mixture of (*E*)-2-methylpent-2-enoic acid (1.00 g, 8.76 mmol, 1 equiv), benzylamine (1.15 mL, 10.5 mmol, 1.20 equiv), *N*-hydroxybenzotriazole hydrate (HOBT, 1.34 g, 8.76 mmol, 1.00 equiv), and powdered 3 Å molecular sieves (700 mg) in dichloromethane (20.0 mL) and *N,N*-dimethylformamide (15.0 mL) at 0 °C. The resulting mixture was warmed to room temperature. After 16 hours, diethyl ether (175 mL) was added. The organic layer was washed sequentially with aqueous HCl solution (1 M, 2 × 100 mL), saturated aqueous NaHCO<sub>3</sub> solution (100 mL), and brine (100 mL); was dried over anhydrous MgSO<sub>4</sub>; was filtered; and was concentrated under reduced pressure. The residue was purified by flash column chromatography on silica gel (0 to 30% ethyl acetate in hexanes) to

give **6j** (1.75 g, 98%) as a yellow oil.  $^1\text{H}$  NMR (500 MHz,  $\text{CDCl}_3$ )  $\delta$  7.39–7.24 (m, 5H), 6.35 (t,  $J$  = 6.8 Hz, 1H), 6.04–5.90 (br-s, 1H), 4.51 (d,  $J$  = 5.4 Hz, 2H), 2.16 (quin,  $J$  = 7.3 Hz, 2H), 1.86 (s, 3H), 1.03 (t,  $J$  = 7.6 Hz, 3H);  $^{13}\text{C}$  NMR (125.7 MHz,  $\text{CDCl}_3$ )  $\delta$  169.5, 138.8, 138.1, 130.4, 128.9, 128.1, 127.7, 44.1, 21.8, 13.5, 12.8; FTIR (thin film)  $\nu$  3307 (br-m), 2965 (w), 2931 (w), 1658 (m), 1617 (s), 1523 (s), 1496 (m), 1453 (m) 1308 (m), 1029 (m)  $\text{cm}^{-1}$ ; HRMS (ESI-TOF) Calc'd for  $\text{C}_{13}\text{H}_{18}\text{NO}$   $[\text{M}+\text{H}]^+$ : 204.1383; found 204.1386.

## Procedures for 1,2-Difluorination and Characterization of Products

### Catalytic Difluorination Reactions:

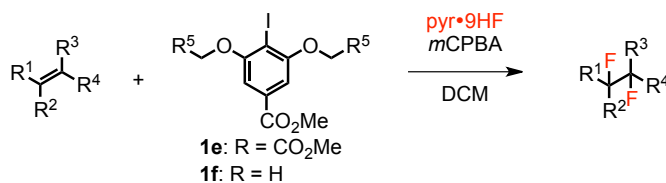

**General Procedure A:** A 75 mL low density polyethylene tube equipped with a stir bar was charged with catalyst **1b** (92.0 mg, 0.210 mmol, 20.0 mol %), *m*-chloroperbenzoic acid (*m*CPBA, 77% by weight, 260 mg, 1.11 mmol, 1.10 equiv), and dichloromethane (20 mL), and the resulting mixture was vigorously stirred. Pyridinium poly(hydrogen fluoride) (pyr•9HF, 2.72 mL, 104 mmol, 100 equiv HF) was added via plastic syringe, and the tube was sealed with a low density polyethylene snap top. A solution of the alkene substrate (1.04 mmol, 1 equiv) in dichloromethane (2 mL) was added dropwise via syringe pump to the reaction mixture through a low density polyethylene snap top by syringe pump over 2 hours. After 12 hours, the reaction mixture was cooled to  $-78\text{ }^{\circ}\text{C}$ , and basic alumina (15 grams) was added slowly to the rapidly stirred mixture. Upon completion of addition, the slurry was allowed to warm to room temperature and was filtered through a short plug of basic alumina. The alumina plug was extracted with dichloromethane (250 mL). The filtrate was concentrated under reduced pressure, and the residue was purified by flash column chromatography on silica gel (0% to 20% diethyl ether in hexanes).

**General Procedure B:** A 75 mL low density polyethylene tube equipped with a stir bar was charged with the alkene substrate (1.04 mmol, 1 equiv), catalyst **1b** (92.0 mg, 0.210 mmol, 20.0 mol %), and dichloromethane (20 mL), the resulting mixture was vigorously stirred. Pyridinium poly(hydrogen fluoride) (pyr•9HF, 2.72 mL, 104 mmol, 100 equiv HF) was added via plastic syringe, then *m*-chloroperbenzoic acid (*m*CPBA, 77% by weight, 303 mg, 1.35 mmol, 1.30 equiv) was added as a solid under an air atmosphere. The tube was sealed with a low density polyethylene snap top. After 20 hours, the reaction mixture was cooled to  $-78\text{ }^{\circ}\text{C}$  and 4 M aqueous NaOH solution was added until pH = 14, and the mixture was allowed to warm to room temperature. The biphasic mixture was diluted with water (150 mL) and was extracted with ethyl acetate (3  $\times$  150 mL). The combined organic layers were dried over anhydrous MgSO<sub>4</sub> and were concentrated under reduced pressure. The resulting residue was purified by flash column chromatography on silica gel (0% to 30% ethyl acetate in dichloromethane). The product-containing fractions were concentrated and <sup>1</sup>H NMR showed ~10% of an inseparable chlorobenzoate ester byproduct. **Byproduct reduction with LAH:** The product mixture was dissolved in tetrahydrofuran (2 mL), and lithium aluminum hydride (3.9 mg, 0.1 mmol) was added as a solid under a nitrogen atmosphere. After 12 hours, the reaction mixture was cooled to 0  $^{\circ}\text{C}$ , and water (1.0 mL) was added dropwise via syringe. The resulting mixture was extracted with ethyl acetate (3  $\times$  5 mL). The combined organic layers were dried over anhydrous MgSO<sub>4</sub> and were concentrated under reduced pressure. The residue was purified by flash column chromatography on silica gel (0% to 30% ethyl acetate in dichloromethane).

**General Procedure C:** A low density polyethylene tube equipped with a stir bar was charged with catalyst **1b** (20.0 mol %), *m*-chloroperbenzoic acid (*m*CPBA, 77% by weight, 1.30 equiv), pyridinium poly(hydrogen fluoride) (pyr•9HF, 100 equiv HF), and dichloromethane (20.0 mL per mmol of substrate) at room temperature, and the tube was sealed with a low density polyethylene

snap top. The resulting biphasic mixture was vigorously stirred, and a solution of the alkene substrate (1 equiv) in dichloromethane (2.0 mL per mmol of substrate) was added via syringe pump over 2 h. After 1 h, the resulting biphasic mixture was transferred carefully into a vigorously stirred suspension of basic alumina (15 g per mmol of substrate) in ethyl acetate at 0 °C. The resulting suspension was filtered, and the filtrate was concentrated under reduced pressure. The residue was purified by flash column chromatography on silica gel.

**General Procedure D:** A low density polyethylene tube equipped with a stir bar was charged with the alkene substrate (1 equiv), catalyst **1b** (20.0 mol %), and pyridinium poly(hydrogen fluoride) (pyr•9HF, 100 equiv HF) at room temperature. The resulting mixture was vigorously stirred, and *m*-chloroperbenzoic acid (*m*CPBA, 77% by weight, 1.30 equiv) was added as a solid under an air atmosphere. The tube was sealed with a low density polyethylene snap top, and after 12 h, the resulting heterogeneous mixture was transferred carefully into a vigorously stirred suspension of basic alumina (15 g per mmol of substrate) in ethyl acetate at 0 °C. The resulting suspension was filtered, and the filtrate was concentrated under reduced pressure. The residue was purified by flash column chromatography on silica gel.

**General Procedure E:** A low density polyethylene tube equipped with a stir bar was charged with the alkene substrate (1 equiv), catalyst **1b** (20.0 mol %), pyridinium poly(hydrogen fluoride) (pyr•9HF, 100 equiv HF), and dichloromethane (6.0 mL per mmol of substrate) at room temperature. The resulting biphasic mixture was vigorously stirred, and *m*-chloroperbenzoic acid (*m*CPBA, 77% by weight, 1.30 equiv) was added as a solid under an air atmosphere. The tube was sealed with a low density polyethylene snap top, and after 12 h, the resulting biphasic mixture was transferred carefully into a vigorously stirred suspension of basic alumina (15 g per mmol of substrate) in ethyl acetate at 0 °C. The resulting suspension was filtered, and the filtrate was concentrated under reduced pressure. The residue was purified by flash column chromatography on silica gel.

**General Procedure F:** A low density polyethylene tube equipped with a stir bar was charged with the alkene substrate (1 equiv), catalyst **1c** (20.0 mol %), and pyridinium poly(hydrogen fluoride) (pyr•9HF, 100 equiv HF) at room temperature. The resulting mixture was vigorously stirred, and *m*-chloroperbenzoic acid (*m*CPBA, 77% by weight, 1.30 equiv) was added as a solid under an air atmosphere. The tube was sealed with a low density polyethylene snap top, and after 12 h, the resulting heterogeneous mixture was transferred carefully into a vigorously stirred suspension of basic alumina (15 g per mmol of substrate) in ethyl acetate at 0 °C. The resulting suspension was filtered, and the filtrate was concentrated under reduced pressure. The residue was purified by flash column chromatography on silica gel.

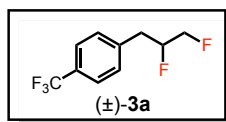

**(±)-3a:** Prepared according to general procedure A. 4-(Trifluoromethyl)allylbenzene (**2a**, 194 mg, 1.04 mmol) was reacted to give **(±)-3a** (142 mg, 61%) as a colorless oil. <sup>1</sup>H NMR (500 MHz, CDCl<sub>3</sub>) δ 7.60 (d, *J* = 8.3 Hz, 2H), 7.38 (d, *J* = Hz, 2H), 4.94–4.79 (m, 1H), 4.62–4.38 (m, 2H), 3.17–3.00 (m, 2H); <sup>13</sup>C NMR (125.7 MHz, CDCl<sub>3</sub>) δ 140.1 (d, *J* = 4.1 Hz), 129.9, 129.6 (q, *J* = 32.5 Hz), 125.8 (m), 124.4 (q, *J* = 271.4 Hz), 91.6 (dd, *J* = 176.9, 20.3 Hz), 83.1 (dd, *J* = 174.8, 23.4 Hz), 36.7–36.5 (m); <sup>19</sup>F NMR (470.4 MHz, CDCl<sub>3</sub>) δ –62.6 (s, 3F), –187.5––187.8 (m, 1c), –232.3 (tdd, *J* = 47.5, 18.8, 15.0 Hz, 1c); FTIR (thin film) ν 1322 (s), 1162 (m), 1111 (s), 1066 (s), 1019 (m) cm<sup>-1</sup>; GCMS (EI<sup>+</sup>) Calc'd for C<sub>10</sub>H<sub>9</sub>F<sub>5</sub> [M]<sup>+</sup>: 224.1; found 224.1. Note: HRMS was not possible for this compound.

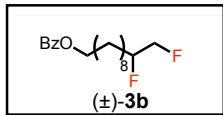

(±)-**3b**: Prepared according to general procedure A with the following modifications: pyridine (0.500 mL, 6.24 mmol, 6.00 equiv) was added to the reaction mixture prior to the addition of pyr•9HF, the substrate was added in a single portion via syringe as a solution in dichloromethane (2.0 mL), and **1b** (46.0 mg, 0.105 mmol, 10.0 mol %) was used. Undec-10-en-1-yl benzoate<sup>13</sup> (**2b**, 285 mg, 1.04 mmol) was reacted, and after work-up, the crude residue was purified by flash column chromatography on silica gel to give (±)-**3b** (165 mg, 51%) as a colorless oil. <sup>1</sup>H NMR (500 MHz, CDCl<sub>3</sub>) δ 8.04 (d, *J* = 7.3 Hz, 2H), 7.56–7.53 (m, 1H), 7.43 (t, *J* = 7.8 Hz, 2H), 4.74–4.36 (m, 3H), 4.32–4.30 (m, 2H), 1.79–1.26 (m, 16H); <sup>13</sup>C NMR (125.7 MHz, CDCl<sub>3</sub>) δ 166.8, 133.0, 130.7, 129.7, 128.5, 92.0 (dd, *J* = 172.6, 19.2 Hz), 84.3 (dd, *J* = 173.6, 23.0 Hz), 65.2, 30.3–30.1 (m), 29.5(2), 29.4(7), 29.4(6), 29.4, 28.9, 26.2, 24.9 (d, *J* = 4.8 Hz); <sup>19</sup>F NMR (470.4 MHz, CDCl<sub>3</sub>) δ –188.8–189.1 (m, 1c), –229.9 (tdd, *J* = 47.7, 20.3, 13.1 Hz, 1F); FTIR (thin film) ν 2928 (m), 2856 (w), 1716 (s), 1273 (s), 1112 (s), 712 (s) cm<sup>-1</sup>; HRMS (ESI-TOF) Calc'd for C<sub>18</sub>H<sub>26</sub>F<sub>2</sub>O<sub>2</sub> [M+H]<sup>+</sup>: 313.1974; found 313.1979.

**Reaction using 1a:** The above procedure was repeated using *p*-iodotoluene as a catalyst (22.7 mg, 0.105 mmol, 10.0 mol %) to give (±)-**3b** (94 mg, 29%) as a colorless oil.

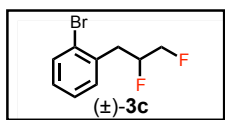

(±)-**3c**: Prepared according to general procedure A using 1-allyl-2-bromobenzene (**2c**, 205 mg, 1.04 mmol). After work-up, the crude residue was purified by flash column chromatography on silica gel to give (±)-**3c** (157 mg, 67%) as a colorless oil. <sup>1</sup>H NMR (500 MHz, CDCl<sub>3</sub>) δ 7.58–7.56 (m, 1H), 7.31–7.26 (m, 2H), 7.16–7.14 (m, 1H), 5.06–4.88 (m, 1H), 4.70–4.39 (m, 2H), 3.21–3.12 (m, 2H); <sup>13</sup>C NMR (125.7 MHz, CDCl<sub>3</sub>) δ 135.5 (d, *J* = 5.8 Hz), 133.2, 132.1, 129.0, 127.9, 124.8, 90.7 (dd, *J* = 176.9, 19.2 Hz), 83.5 (dd, *J* = 175.8, 22.1 Hz), 37.0–36.8 (m); <sup>19</sup>F NMR (470.4 MHz, CDCl<sub>3</sub>) δ –187.5–188.0 (m, 1F), –232.0 (tdd, *J* = 47.7, 22.7, 13.1 Hz, 1F); FTIR (thin film) ν 2954 (w), 1472 (m), 1441 (w), 1076 (m), 1026 (s), 750 (s) cm<sup>-1</sup>; GCMS (EI<sup>+</sup>) Calc'd for C<sub>9</sub>H<sub>9</sub>BrF<sub>2</sub> [M]<sup>+</sup>: 234.0; found 234.0. Note: HRMS was not possible for this compound.

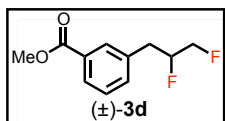

(±)-**3d**: Prepared according to general procedure A using methyl 3-allylbenzoate (**2d**, 183 mg, 1.04 mmol). After work-up, the crude residue was purified by flash column chromatography on silica gel to give (±)-**3d** (136 mg, 61%) as a colorless oil. <sup>1</sup>H NMR (500 MHz, CDCl<sub>3</sub>) δ 7.94–7.92 (m, 2H), 7.44–7.37 (m, 2H), 4.93–4.78 (m, 1H), 4.60–4.36 (m, 2H), 3.90 (s, 3H), 3.13–2.97 (m, 2H); <sup>13</sup>C NMR (125.7 MHz, CDCl<sub>3</sub>) δ 167.0, 136.3 (d, *J* = 5.8 Hz), 134.1, 130.7, 130.5, 128.9, 128.4, 91.8 (dd, *J* = 19.2, 176.5 Hz), 83.2 (dd, *J* = 174.5, 23.0 Hz), 52.3, 36.5 (dd, *J* = 22.1, 6.7 Hz); <sup>19</sup>F NMR (470.4 MHz, CDCl<sub>3</sub>) δ –187.2–187.6 (m, 1F), –232.2 (tdd, *J* = 47.7, 21.5, 13.1 Hz, 1F); FTIR (thin film) ν 2954 (w), 1716 (s), 1278 (s), 1200 (s), 1086 (m), 749 (s) cm<sup>-1</sup>; HRMS (ESI-TOF) Calc'd for C<sub>11</sub>H<sub>12</sub>F<sub>2</sub>O<sub>2</sub> [M]<sup>+</sup>: 215.0878; found 215.0886.

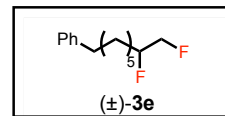

(±)-**3e**: Prepared according to general procedure A with the following modifications: pyridine (0.500 mL, 6.24 mmol, 6.00 equiv) was added to the reaction mixture prior to the addition of pyr•9HF, the substrate was added in a single portion via syringe as a solution in dichloromethane (2.0 mL), and **1b** (46.0 mg, 0.105 mmol, 10.0 mol %) was used. Oct-7-en-1-ylbenzene<sup>14</sup> (**2e**, 196 mg, 1.04 mmol) was reacted, and after work-up, the crude residue was purified by flash column chromatography on silica gel to give (±)-**3e** (104 mg, 44%) as a colorless oil. <sup>1</sup>H NMR (500 MHz, CDCl<sub>3</sub>) δ 7.32–7.29 (m, 2H), 7.22–7.20 (m, 3H), 4.77–4.38 (m, 3H), 2.64 (t, *J* = 7.8 Hz, 2H),



1.76–1.30 (m, 10H);  $^{13}\text{C}$  NMR (125.7 MHz,  $\text{CDCl}_3$ )  $\delta$  142.9, 128.6, 128.5, 125.8, 92.0 (dd,  $J = 172.6, 19.2$  Hz), 84.4 (dd,  $J = 173.6, 23.0$  Hz), 36.1, 31.5, 30.3–30.1 (m), 29.3, 29.2, 24.9 (d,  $J = 4.8$  Hz);  $^{19}\text{F}$  NMR (470.4 MHz,  $\text{CDCl}_3$ )  $\delta$  –188.8––189.1 (m, 1F), –229.9 (tdd,  $J = 47.7, 20.3, 13.1$ , 1F); FTIR (thin film)  $\nu$  2930 (m), 2857 (w), 1496 (w), 1029 (m), 748 (m), 698 (s)  $\text{cm}^{-1}$ ; GCMS (EI $^+$ ) Calc'd for  $\text{C}_{14}\text{H}_{20}\text{F}_2$  [M] $^+$ : 226.2; found 226.2. Note: HRMS was not possible for this compound.

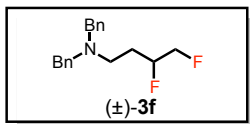

**(±)-3f:** Prepared according to general procedure B with the following modification: flash column chromatography was conducted with 0% to 15% diethyl ether in hexanes. *N,N*-Dibenzylbut-3-en-1-amine (**2f**, 261 mg, 1.04 mmol) was reacted, and, after work-up, the crude residue was purified by flash column chromatography on silica gel to give (±)-**3f** (181 mg, 60%) as a colorless oil which solidified on standing.  $^1\text{H}$  NMR (500 MHz,  $\text{CDCl}_3$ )  $\delta$  7.41–7.30 (m, 10H), 4.88–4.75 (m, 1H), 4.49–4.25 (m, 2H), 3.66–3.60 (m, 4H), 2.69–2.59 (m, 2H), 1.99–1.77 (m, 2H);  $^{13}\text{C}$  NMR (125.7 MHz,  $\text{CDCl}_3$ )  $\delta$  139.5, 129.0, 128.5, 127.2, 90.5 (dd,  $J = 172.6, 18.2$  Hz), 84.1 (dd,  $J = 173.6, 22.0$  Hz), 58.7, 49.1 (d,  $J = 5.8$  Hz), 28.0 (dd,  $J = 21.1, 5.75$  Hz);  $^{19}\text{F}$  NMR (470.4 MHz,  $\text{CDCl}_3$ )  $\delta$  –189.0––189.3 (m, 1F), –230.6 (tdd,  $J = 47.7, 22.7, 13.1$  Hz, 1F); FTIR (thin film)  $\nu$  2799 (w), 1452 (w), 745 (m), 732 (w), 697 (s)  $\text{cm}^{-1}$ ; HRMS (ESI-TOF) Calc'd for  $\text{C}_{18}\text{H}_{21}\text{F}_2\text{N}$  [M+H] $^+$ : 290.1715; found 290.1722.

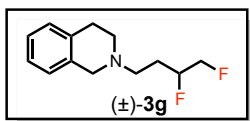

**(±)-3g:** Prepared according to general procedure B using 2-(but-3-en-1-yl)-1,2,3,4-tetrahydroisoquinoline (**2g**, 194 mg, 1.04 mmol). After work-up, the crude residue was purified by flash column chromatography on silica gel to give (±)-**3g** (122 mg, 52%) as a pale brown oil.  $^1\text{H}$  NMR (500 MHz,  $\text{CDCl}_3$ )  $\delta$  7.16–7.05 (m, 4H), 4.96–4.79 (m, 1H), 4.67–4.44 (m, 2H), 3.69–3.62 (m, 2H), 2.93–2.91 (m, 2H), 2.79–2.69 (m, 4H), 2.07–1.86 (m, 2H);  $^{13}\text{C}$  NMR (125.7 MHz,  $\text{CDCl}_3$ )  $\delta$  134.8, 134.4, 128.8, 126.7, 126.4, 125.8, 90.6 (dd,  $J = 172.6, 19.2$  Hz), 84.4 (dd,  $J = 173.6, 22.0$  Hz), 56.3, 53.5 (d,  $J = 4.8$  Hz), 51.1, 29.3, 28.0 (m);  $^{19}\text{F}$  NMR (470.4 MHz,  $\text{CDCl}_3$ )  $\delta$  –189.6––189.9 (m, 1F), –230.1 (tdd,  $J = 47.7, 21.5, 13.1$  Hz, 1F); FTIR (thin film)  $\nu$  2953 (w), 2778 (w), 1089 (m), 741 (s)  $\text{cm}^{-1}$ ; HRMS (ESI-TOF) Calc'd for  $\text{C}_{13}\text{H}_{17}\text{F}_2\text{N}$  [M+H] $^+$ : 226.1402; found 226.1404.

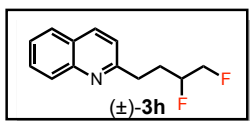

**(±)-3h:** Prepared according to general procedure B with the following modifications: flash column chromatography was conducted with 0% to 100% ethyl acetate in hexanes and the *m*-chlorobenzoate ester byproduct was hydrolyzed by dissolving the product mixture obtained after the first column in a 1:1:1 mixture of methanol:tetrahydrofuran:aqueous 2.0 M NaOH solution (1.2 mL total) and stirring for 12 hours. The mixture was diluted with water (5 mL) and was extracted with ethyl acetate (3  $\times$  20 mL). The combined organic layers were dried over anhydrous  $\text{MgSO}_4$  and were concentrated under reduced pressure. The residue was purified by flash column chromatography on silica gel (0 to 20% diethyl ether in hexanes). 2-(But-3-en-1-yl)quinoline<sup>15</sup> (**2h**, 191 mg, 1.04 mmol) was reacted to give (±)-**3h** (140 mg, 61%) as a pale yellow oil.  $^1\text{H}$  NMR (500 MHz,  $\text{CDCl}_3$ )  $\delta$  8.05 (d,  $J = 8.3$  Hz, 1H), 8.03 (d,  $J = 8.3$  Hz, 1H), 7.77 (d,  $J = 8.3$  Hz, 1H), 7.68 (t,  $J = 7.8$ , 1H), 7.50–7.47 (m, 1H), 7.28 (d,  $J = 8.3$  Hz, 1H), 4.89–4.71 (m, 1H), 4.64–4.41 (m, 2H), 3.21–3.07 (m, 2H), 2.29–2.14 (m, 2H);  $^{13}\text{C}$  NMR (125.7 MHz,  $\text{CDCl}_3$ )  $\delta$  160.9, 148.1, 136.6, 129.6, 129.0, 127.7, 127.0, 126.1, 121.6, 91.4 (dd,  $J = 172.6, 19.2$  Hz), 84.2 (dd,  $J = 173.6, 22.1$  Hz), 34.0 (d,  $J = 3.8$  Hz), 29.6 (dd,  $J = 20.1, 6.7$  Hz);  $^{19}\text{F}$  NMR (470.4 MHz,  $\text{CDCl}_3$ )  $\delta$  –190.3––190.6 (m, 1F), –230.1 (tdd,  $J = 47.7, 21.5, 13.1$  Hz, 1F); FTIR (thin film)  $\nu$  2953 (w), 1503 (m), 1085 (m), 1031 (m), 825 (s), 751 (s)  $\text{cm}^{-1}$ ; HRMS (ESI-TOF) Calc'd for  $\text{C}_{13}\text{H}_{13}\text{F}_2\text{N}$  [M+H] $^+$ : 222.1089; found 222.1091.

**Reaction using 1a:** The above procedure was repeated using *p*-iodotoluene as a catalyst (45.4 mg, 0.20 mmol, 20.0 mol %) to give ( $\pm$ )-**3h** (130 mg, 57%) as a pale yellow oil.

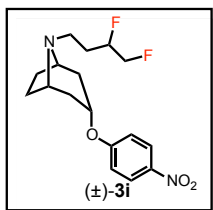

**( $\pm$ )-3i:** Prepared according to general procedure B with the following modifications: no additional byproduct degradation step was necessary, and flash column chromatography was conducted on silica gel with a gradient of 0% to 10% methanol in dichloromethane. 8-(But-3-en-1-yl)-3-(4-nitrophenoxy)-8-azabicyclo[3.2.1]octane (**2i**, 314 mg, 1.04 mmol) was reacted to give ( $\pm$ )-**3i** (209 mg, 59%) as a pale brown oil.  $^1\text{H}$  NMR (500 MHz,  $\text{CDCl}_3$ )  $\delta$  8.17 (d,  $J = 9.3$  Hz, 2H), 6.85 (d,  $J = 9.3$  Hz, 2H), 5.00–4.79 (m, 1H), 4.66–4.44 (m, 3H), 3.24 (s, 2H), 2.60–2.48 (m, 2H), 2.22–2.16 (m, 2H), 2.03–1.75 (m, 8H);  $^{13}\text{C}$  NMR (125.7 MHz,  $\text{CDCl}_3$ )  $\delta$  162.9, 141.2, 126.2, 115.2, 90.7 (dd,  $J = 172.6, 19.2$  Hz), 84.5 (dd,  $J = 173.6, 23.0$  Hz), 71.5, 58.7, 58.1, 48.0 (d,  $J = 4.8$  Hz), 36.0 (d,  $J = 8.6$  Hz), 29.9–29.7 (m), 26.2 (d,  $J = 35.5$  Hz);  $^{19}\text{F}$  NMR (470.4 MHz,  $\text{CDCl}_3$ )  $\delta$  -189.6–-189.9 (m, 1F), -229.4 (tdd,  $J = 47.7, 21.5, 13.1$  Hz, 1F); FTIR (thin film)  $\nu$  2946 (w), 1591 (m), 1336 (m), 1250 (m), 1109 (s), 1037 (m), 843 (m), 751 (m)  $\text{cm}^{-1}$ ; HRMS (ESI-TOF) Calc'd for  $\text{C}_{17}\text{H}_{22}\text{F}_2\text{N}_2\text{O}_3$  [ $\text{M}+\text{H}$ ] $^+$ : 341.1671; found 341.1686.

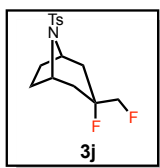

**3j:** Prepared according to general procedure A with the following modification: the substrate was added in a single portion via syringe as a solution in dichloromethane (2.0 mL). 3-Methylene-8-tosyl-8-azabicyclo[3.2.1]octane (**2i**, 288 mg, 1.04 mmol) was reacted to give a 4:1 diastereomeric mixture prior to purification as determined by  $^1\text{H}$  and  $^{19}\text{F}$  NMR analysis. After work-up, the crude residue was purified by flash column chromatography on silica gel (0 to 20% diethyl ether in hexanes) to give **3j** (81 mg, 25%) as a white crystalline solid. The diastereomeric ratio of the purified product was determined to be >19:1 by  $^1\text{H}$  and  $^{19}\text{F}$  NMR analysis. The connectivity and relative stereochemistry of **3j** were secured by X-ray diffraction analysis of a single crystal (page S40, vide infra). $^{16}$   $^1\text{H}$  NMR (500 MHz,  $\text{CDCl}_3$ )  $\delta$  7.75 (d,  $J = 8.3$  Hz, 2H), 7.29 (d,  $J = 7.8$  Hz, 2H), 4.30 (s, 2H), 4.18 (dd,  $J = 46.9, 17.6$  Hz, 1H), 2.48 (s, 3H), 2.14–1.90 (m, 6H), 1.54–1.52 (m, 2H);  $^{13}\text{C}$  NMR (125.7 MHz,  $\text{CDCl}_3$ )  $\delta$  143.9, 137.1, 129.9, 127.5, 93.4 (dd,  $J = 173.6, 18.2$  Hz), 87.3 (dd,  $J = 178.4, 26.9$  Hz), 55.2, 38.7(m), 27.9 (d,  $J = 3.8$  Hz), 21.7;  $^{19}\text{F}$  NMR (470.4 MHz,  $\text{CDCl}_3$ )  $\delta$  -152.9–-153.2 (m, 1F), -229.9 (tdd,  $J = 47.7, 20.3, 13.1$ , 1F); FTIR (thin film)  $\nu$  2978 (w), 1383 (m), 1184 (s), 1102 (m), 1088 (s), 680 (s), 573 (m)  $\text{cm}^{-1}$ ; HRMS (ESI-TOF) Calc'd for  $\text{C}_{15}\text{H}_{19}\text{F}_2\text{NO}_2\text{S}$  [ $\text{M}+\text{H}$ ] $^+$ : 316.1177; found 316.1190.

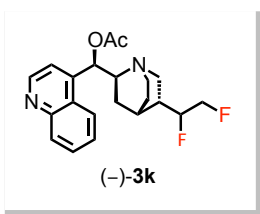

**(-)-3k:** Prepared according to general procedure B with the following modification: flash column chromatography was conducted on silica gel with a gradient of 50% ethyl acetate in dichloromethane to 100% dichloromethane to 10% methanol in dichloromethane. (-)-Cinchonidine-9-acetate (**2k** $^{17}$ , 351 mg, 1.04 mmol) was reacted to give (-)-**3k** (238 mg, 61%) as a sticky, pale brown solid. The diastereomeric ratios of the crude and purified products were independently determined to be 10:1 by  $^1\text{H}$  and  $^{19}\text{F}$  NMR analysis.  $^1\text{H}$  NMR (500 MHz,  $\text{CDCl}_3$ , \*denotes minor diastereomer resonance)  $\delta$  8.89 (d,  $J = 4.4$  Hz, 1H), 8.21 (d,  $J = 8.3$  Hz, 1H), 8.13 (d,  $J = 8.3$  Hz, 1H), 7.73–7.70 (m, 1H), 7.61–7.58 (m, 1H), 7.38 (d,  $J = 4.4$  Hz, 1H), 6.52 (d,  $J = 7.3$  Hz, 1H), 4.57–4.32 (m, 3H), 3.46–3.44\* (m, 1H), 3.34–3.32 (m, 1H), 3.14–3.10 (m, 1H), 2.97–2.91 (m, 1H), 2.85–2.82\* (m, 1H), 2.65–2.59 (m, 1H), 2.31–2.27 (m, 1H), 2.15–2.11 (m, 4H), 1.94–1.91 (m, 2H), 1.79–1.70 (m, 1H), 1.63–1.43 (m, 2H);  $^{13}\text{C}$  NMR (125.7 MHz,  $\text{CDCl}_3$ ,

\*denotes minor diastereomer resonance)  $\delta$  170.1, 150.1, 148.8, 145.2, 130.7, 129.4, 127.1, 126.1, 123.5, 119.0, 94.4\* (dd,  $J = 174.5, 13.4$  Hz), 92.9 (dd,  $J = 178.4, 19.2$  Hz), 83.4\* (dd,  $J = 174.5, 24.0$  Hz), 82.9 (dd,  $J = 175.5, 23.4$  Hz), 74.1, 60.1, 59.6\*, 53.0 (d,  $J = 6.7$  Hz), 42.5, 42.4\*, 36.1–36.0\* (m), 35.3 (dd,  $J = 18.2, 5.8$  Hz), 29.9\*, 28.3\*, 27.4, 25.3\*, 24.9\* (d,  $J = 6.7$  Hz), 24.7, 22.1 (d,  $J = 2.9$  Hz), 21.2;  $^{19}\text{F}$  NMR (470.4 MHz,  $\text{CDCl}_3$ , \*denotes minor diastereomer resonance)  $\delta$  -187.2–-187.5 (m, 1F), -196.7–-197.0\* (m, 1F), -230.8 (tdd,  $J = 46.5, 22.6, 14.3$  Hz, 1F), -232.5\* (tdd,  $J = 47.7, 22.7, 13.1$  Hz, 1F); FTIR (thin film)  $\nu$  2948 (w), 1743 (s), 1229 (s), 1022 (s), 729 (s)  $\text{cm}^{-1}$ ; HRMS (ESI-TOF) Calc'd for  $\text{C}_{21}\text{H}_{24}\text{F}_2\text{N}_2\text{O}_2$   $[\text{M}+\text{H}]^+$ : 375.1879; found 375.1895.  $[\alpha]_D^{23} = -24.2$  ( $c = 1.0, \text{CHCl}_3$ ).

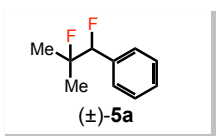

(±)-**5a**. Prepared according to general procedure C using 2-Methyl-1-phenyl-1-propene (**4a**, 137 mg, 1.04 mmol). After work-up, the crude residue was purified by flash column chromatography on silica gel (hexanes) to give (±)-**5a** (108 mg, 61%) as a colorless oil.  $^1\text{H}$  NMR (500 MHz,  $\text{CDCl}_3$ )  $\delta$  7.40–7.37 (m, 5H), 5.34 (dd,  $J = 44.9, 13.7$  Hz, 1H), 1.41 (dd,  $J = 21.5, 2.0$  Hz, 3H), 1.36 (dd,  $J = 21.5, 1.0$  Hz, 3H);  $^{13}\text{C}$  NMR (125.7 MHz,  $\text{CDCl}_3$ )  $\delta$  136.0–135.8 (m), 128.9 (d,  $J = 1.9$  Hz), 128.3, 127.2–127.1 (m), 97.7–96.1 (m), 96.1–94.5 (m), 23.0 (dd,  $J = 24.0, 3.8$  Hz), 22.8 (dd,  $J = 24.0, 3.8$  Hz);  $^{19}\text{F}$  NMR (470.4 MHz,  $\text{CDCl}_3$ )  $\delta$  -149.9–-150.3 (m, 1F), -187.9 (dd,  $J = 45.3, 10.7$  Hz, 1F); FTIR (thin film)  $\nu$  3036 (w), 1023 (m), 740 (s), 699 (s)  $\text{cm}^{-1}$ ; GCMS (EI $^+$ ) Calc'd for  $\text{C}_{10}\text{H}_{12}\text{F}_2$   $[\text{M}]^+$ : 170.1; found 170.1. Note: HRMS was not possible for this compound.

**Reaction using 1a:** The above procedure was repeated using *p*-iodotoluene as a catalyst (45.4 mg, 0.20 mmol, 20.0 mol %) to give (±)-**5a** (61 mg, 34%) as a colorless oil.

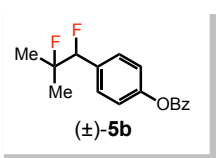

(±)-**5b**: Prepared according to general procedure C using 4-(2-methylprop-1-en-1-yl)phenyl benzoate (**4b**, 300 mg, 1.19 mmol). After work-up, the crude residue was purified by flash column chromatography on silica gel (0 to 2% ethyl acetate in hexanes) to give (±)-**5b** (235 mg, 68%) as a white solid.  $^1\text{H}$  NMR (500 MHz,  $\text{CDCl}_3$ )  $\delta$  8.22 (dd,  $J = 8.3, 1.5$  Hz, 2H), 7.65 (t,  $J = 7.6$  Hz, 1H), 7.53 (t,  $J = 7.8$  Hz, 2H), 7.45 (d,  $J = 8.3$  Hz, 2H), 7.27 (d,  $J = 8.3$  Hz, 2H), 5.36 (dd,  $J = 44.9, 13.7$  Hz, 1H), 1.43 (dd,  $J = 22.0, 2.0$  Hz, 3H), 1.38 (dd,  $J = 22.5, 1.0$  Hz, 3H);  $^{13}\text{C}$  NMR (125.7 MHz,  $\text{CDCl}_3$ )  $\delta$  165.1, 151.4, 133.9, 133.5 (dd,  $J = 2.9, 21.1$  Hz), 130.4, 129.6, 128.8, 128.4 (d,  $J = 7.7$  Hz), 121.6, 96.3 (dd,  $J = 181.2, 25.9$  Hz), 95.1 (dd,  $J = 173.6, 24.0$  Hz), 22.9 (d,  $J = 24.0$  Hz), 22.9 (d,  $J = 24.0$  Hz);  $^{19}\text{F}$  NMR (376.3 MHz,  $\text{CDCl}_3$ )  $\delta$  -150.3–-150.8 (m, 1F), -186.9 (dd,  $J = 44.9, 10.5$  Hz, 1F); FTIR (thin film)  $\nu$  3065 (w), 2989 (w), 1734 (s), 1509 (m), 1262 (s), 1202 (s), 1169 (m), 1061 (m)  $\text{cm}^{-1}$ ; HRMS (ESI-TOF) Calc'd for  $\text{C}_{17}\text{H}_{17}\text{F}_2\text{O}_2$   $[\text{M}+\text{H}]^+$ : 291.1191; found 291.1195.

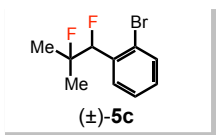

(±)-**5c**. Prepared according to general procedure C using 1-Bromo-2-(2-methylprop-1-en-1-yl)benzene<sup>18</sup> (**4c**, 220 mg, 1.04 mmol). After work-up, the crude residue was purified by flash column chromatography on silica gel (0 to 20% diethyl ether in hexanes) to give (±)-**5c** (159 mg, 61%) as a colorless oil.  $^1\text{H}$  NMR (500 MHz,  $\text{CDCl}_3$ )  $\delta$  7.62–7.57 (m, 2H), 7.38 (t,  $J = 7.3$  Hz, 1H), 7.23 (m, 1H), 5.82 (dd,  $J = 44.1, 18.3$  Hz, 1H), 1.54 (dd,  $J = 21.5, 1.5$  Hz, 3H), 1.37 (dd,  $J = 1.5, 21.5$  Hz, 3H);  $^{13}\text{C}$  NMR (125.7 MHz,  $\text{CDCl}_3$ )  $\delta$  135.4 (d,  $J = 13.4$  Hz), 132.8, 130.5, 130.1 (dd,  $J = 7.7, 3.8$  Hz), 127.7, 123.5 (d,  $J = 5.8$  Hz), 96.5–95.4 (m), 95.1–93.9 (m), 23.7–23.5 (m), 23.1 (dd,  $J = 24.0, 3.8$  Hz);  $^{19}\text{F}$  NMR (470.4 MHz,  $\text{CDCl}_3$ )  $\delta$  -153.4–-153.8 (m,

1F),  $-184.4$  (dd,  $J = 44.1, 10.7$  Hz, 1F); FTIR (thin film)  $\nu$  2989 (w), 1015 (m), 802 (m), 750 (s), 570 (m)  $\text{cm}^{-1}$ ; GCMS (EI<sup>+</sup>) Calc'd for  $\text{C}_{10}\text{H}_{11}\text{BrF}_2$  [M]<sup>+</sup>: 248.0; found 248.0. Note: HRMS was not possible for this compound.

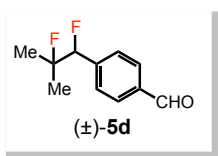

(±)-**5d**: Prepared according to general procedure C using 4-(2-methylprop-1-en-1-yl)benzaldehyde<sup>19</sup> (**4d**, 180 mg, 1.11 mmol). After work-up, the crude residue was purified by flash column chromatography on silica gel (0 to 5% ethyl acetate in hexanes) to give (±)-**5d** (155 mg, 70%) as a light yellow oil. <sup>1</sup>H NMR (500 MHz,  $\text{CDCl}_3$ )  $\delta$  10.03 (s, 1H), 7.90 (d,  $J = 8.3$  Hz, 2H), 7.54 (d,  $J = 7.8$  Hz, 2H), 5.38 (dd,  $J = 45.5, 12.7$  Hz, 1H), 1.42 (dd,  $J = 21.5, 2.0$  Hz, 3H), 1.33 (dd,  $J = 21.4, 1.5$  Hz, 3H); <sup>13</sup>C NMR (125.7 MHz,  $\text{CDCl}_3$ )  $\delta$  192.0, 142.3 (dd,  $J = 21.0, 1.9$  Hz), 136.7, 129.6, 127.7 (dd,  $J = 8.6, 1.9$  Hz), 96.0 (dd,  $J = 182.1, 26.7$  Hz), 94.9 (dd,  $J = 174.5, 24.8$  Hz), 23.4 (dd,  $J = 23.8, 2.9$  Hz), 22.5 (dd,  $J = 23.8, 2.9$  Hz); <sup>19</sup>F NMR (376.3 MHz,  $\text{CDCl}_3$ )  $\delta$   $-150.5$ – $-150.9$  (m, 1F),  $-189.3$  (dd,  $J = 45.8, 9.1$  Hz, 1F); FTIR (thin film)  $\nu$  2989 (w), 2937 (w), 1701 (s), 1612 (m), 1387 (m), 1209 (s), 1034 (s)  $\text{cm}^{-1}$ ; GCMS (EI<sup>+</sup>) Calc'd for  $\text{C}_{11}\text{H}_{12}\text{F}_2\text{O}$  [M]<sup>+</sup>: 198.1; found 198.1. Note: HRMS was not possible for this compound.

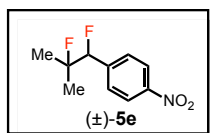

(±)-**5e**. Prepared according to general procedure C using 1-(2-Methylprop-1-en-1-yl)-4-nitrobenzene<sup>20</sup> (**4e**, 184 mg, 1.04 mmol). After work-up, the crude residue was purified by flash column chromatography on silica gel (0 to 20% diethyl ether in hexanes) to give (±)-**5e** (171 mg, 76%) as a pale yellow oil which solidified on standing. <sup>1</sup>H NMR (500 MHz,  $\text{CDCl}_3$ )  $\delta$  8.23 (d,  $J = 8.8$ , 2H), 7.55 (d,  $J = 8.3$  Hz, 2H), 5.44–5.34 (dd,  $J = 45.5, 12.2$  Hz, 1H), 1.45 (dd,  $J = 22.0, 2.0$  Hz, 3H), 1.33 (dd,  $J = 21.5, 1.5$  Hz, 3H); <sup>13</sup>C NMR (125.7 MHz,  $\text{CDCl}_3$ )  $\delta$  148.2, 142.8 (dd,  $J = 21.1, 1.9$  Hz), 128.1–128.0 (m), 123.4, 95.5 (dd,  $J = 182.2, 26.9$  Hz), 94.6 (dd,  $J = 174.5, 24.0$  Hz), 23.7 (dd,  $J = 23.0, 2.9$  Hz), 22.3 (dd,  $J = 24.0, 3.8$  Hz); <sup>19</sup>F NMR (470.4 MHz,  $\text{CDCl}_3$ )  $\delta$   $-151.2$ – $-151.5$  (m, 1F),  $-189.4$  (dd,  $J = 45.3, 8.3$  Hz, 1F); FTIR (thin film)  $\nu$  2991 (w), 1522 (s), 1346 (s), 1037 (m), 739 (m)  $\text{cm}^{-1}$ ; HRMS (ESI-TOF) Calc'd for  $\text{C}_{10}\text{H}_{11}\text{F}_2\text{NO}_2$  [M+H]<sup>+</sup>: 216.0831; found 216.0805.

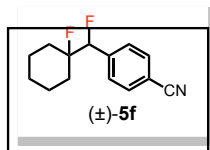

(±)-**5f**: Prepared according to general procedure C using 4-(cyclohexylidenemethyl)benzotrile<sup>21</sup> (**4f**, 200 mg, 1.01 mmol). After work-up, the crude residue was purified by flash column chromatography on silica gel (0 to 40% dichloromethane in hexanes) to give (±)-**5f** (162 mg, 68%) as a colorless oil. <sup>1</sup>H NMR (500 MHz,  $\text{CDCl}_3$ )  $\delta$  7.67 (d,  $J = 8.3$  Hz, 2H), 7.46 (d,  $J = 8.3$  Hz, 2H), 5.29 (dd,  $J = 44.8, 14.2$  Hz, 1H), 1.86–1.77 (m, 1H), 1.75–1.35 (m, 8H), 1.27–1.12 (m, 1H); <sup>13</sup>C NMR (125.7 MHz,  $\text{CDCl}_3$ )  $\delta$  140.8 (d,  $J = 21.1$  Hz), 132.0, 128.0 (dd,  $J = 8.6, 2.9$  Hz), 118.6, 112.7, 95.7 (dd,  $J = 181.2, 25.9$  Hz), 94.9 (dd,  $J = 178.4, 23.0$  Hz), 31.6 (dd,  $J = 22.1, 2.9$  Hz), 30.3 (dd,  $J = 23.0, 3.8$  Hz), 25.0, 21.2 (d,  $J = 1.9$  Hz), 21.2 (d,  $J = 2.2$  Hz); <sup>19</sup>F NMR (470.4 MHz,  $\text{CDCl}_3$ )  $\delta$   $-170.7$ – $-171.5$  (m, 1F),  $-191.6$  (dd,  $J = 44.8, 8.3$  Hz, 1F); FTIR (thin film)  $\nu$  2936 (m), 2229 (m), 1444 (w), 1026 (s), 1017 (m), 949 (m), 850 (m)  $\text{cm}^{-1}$ ; HRMS (ESI-TOF) Calc'd for  $\text{C}_{14}\text{H}_{16}\text{F}_2\text{N}$  [M+H]<sup>+</sup>: 236.1245; found 236.1236.

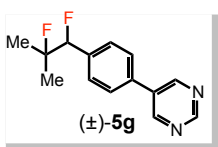

(±)-**5g**. Prepared according to general procedure C using 5-(4-(2-methylprop-1-en-1-yl)phenyl)pyrimidine (**4g**, 219 mg, 1.04 mmol) with the following modifications: after the indicated time, the reaction mixture was cooled to  $-78$  °C and 4 M aqueous NaOH solution was added until pH = 14. Upon completion of addition, the mixture was allowed to warm to room temperature with stirring. The biphasic mixture was added to a 500 mL separatory funnel,

diluted with water (150 mL), and extracted with ethyl acetate (3 × 150 mL). The combined organic layers were dried over anhydrous MgSO<sub>4</sub> and were concentrated under reduced pressure. The residue was purified by flash column chromatography (0% to 50% ethyl acetate in hexanes). 5-(4-(2-methylprop-1-en-1-yl)phenyl)pyrimidine (**4g**, 219 mg, 1.04 mmol) was reacted to give a pale yellow oil which solidified on standing (173 mg, 70%). <sup>1</sup>H NMR (500 MHz, CDCl<sub>3</sub>) δ 9.17 (s, 1H), 8.92 (s, 2H), 7.57 (d, *J* = 8.3, 2H), 7.49 (d, *J* = 7.8 Hz, 2H), 5.34 (dd, *J* = 44.9, 13.7 Hz, 1H), 1.41–1.37 (m, 3H), 1.33 (d, *J* = 22.0 Hz, 3H); <sup>13</sup>C NMR (125.7 MHz, CDCl<sub>3</sub>) δ 157.8, 155.0, 136.8–136.6 (m), 134.7, 133.8, 128.2 (dd, *J* = 7.7, 1.9 Hz), 126.8, 96.2 (dd, *J* = 163.0, 25.9 Hz), 94.9 (dd, *J* = 174.5, 24.0 Hz), 23.2 (dd, *J* = 24.0, 2.9 Hz), 22.7 (dd, *J* = 24.0, 2.9 Hz); <sup>19</sup>F NMR (470.4 MHz, CDCl<sub>3</sub>) δ -150.8–-151.2 (m, 1F), -188.4 (dd, *J* = 45.3, 9.5 Hz, 1F); FTIR (thin film) ν 2989 (w), 1551 (m), 1413 (s), 724 (s), 573 (s) cm<sup>-1</sup>; HRMS (ESI-TOF) Calc'd for C<sub>14</sub>H<sub>14</sub>F<sub>2</sub>N<sub>2</sub> [M+H]<sup>+</sup>: 249.1198; found 249.1208.

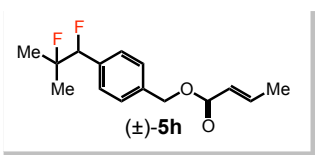

(±)-**5h**: Prepared according to general procedure C using (*E*)-4-(2-methylprop-1-en-1-yl)benzyl but-2-enoate (**4h**, 300 mg, 1.30 mmol) with the following modifications: addition of the substrate solution was carried out over 1 h via syringe pump, the reaction was carried out at 0 °C, and *m*-chloroperbenzoic acid (*m*CPBA, 77% by weight, 321 mg, 1.43 mmol, 1.10 equiv) was used. After work-up, the crude residue was purified by flash column chromatography on silica gel (0 to 2% ethyl acetate in hexanes) to give (±)-**5h** (271 mg, 78%) as a colorless oil. <sup>1</sup>H NMR (500 MHz, CDCl<sub>3</sub>) δ 7.40–7.34 (m, 4H), 7.03 (qd, *J* = 6.9, 15.7 Hz, 1H), 5.90 (qd, *J* = 1.5, 15.7 Hz, 1H), 5.32 (dd, *J* = 45.0, 13.7 Hz, 1H), 5.18 (s, 2H), 1.89 (dd, *J* = 6.9, 1.5 Hz, 3H), 1.39 (dd, *J* = 21.5, 1.5 Hz, 3H), 1.33 (dd, *J* = 21.6, 1.5 Hz, 3H); <sup>13</sup>C NMR (125.7 MHz, CDCl<sub>3</sub>) δ 166.4, 145.5, 137.0, 135.8 (dd, *J* = 21.0, 2.9 Hz), 128.0, 127.4 (dd, *J* = 7.6, 1.9 Hz), 122.6, 96.6 (dd, *J* = 181.2, 25.7 Hz), 95.1 (dd, *J* = 173.6, 23.2 Hz), 65.6, 23.0 (t, *J* = 3.3 Hz), 22.8 (t, *J* = 3.3 Hz), 18.2; <sup>19</sup>F NMR (470.4 MHz, CDCl<sub>3</sub>) δ -150.1–-150.5 (m, 1F), -187.9 (dd, *J* = 44.8, 10.0 Hz, 1F); FTIR (neat) ν 2985 (w), 2940 (w), 1718 (s), 1657 (m), 1261 (m), 1172 (s), 1014 (s), 967 (m) cm<sup>-1</sup>; HRMS (ESI-TOF) Calc'd for C<sub>15</sub>H<sub>19</sub>F<sub>2</sub>O<sub>2</sub> [M+H]<sup>+</sup>: 269.1348; found 269.1338.



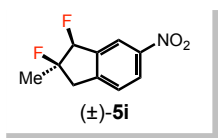

(±)-**5i**. Prepared according to general procedure C using 2-Methyl-5-nitro-1*H*-indene (**4i**, 273 mg, 1.56 mmol) with the following modifications: *m*-chloroperbenzoic acid (*m*CPBA, 77% by weight, 390 mg, 1.72 mmol, 1.10 equiv) was used. After work-up, the diastereomeric ratio of the crude product was determined to be 5:1 by <sup>1</sup>H and <sup>19</sup>F NMR analysis. The crude product was purified by flash column chromatography on silica gel (0 to 20% diethyl ether in hexanes) to give (±)-**5i** (200 mg, 60%) as a pale yellow oil. The diastereomeric ratio of the purified product was determined to be >19:1 by <sup>1</sup>H and <sup>19</sup>F NMR analysis. The connectivity and relative stereochemistry of (±)-**5i** were secured by X-ray diffraction analysis of a single crystal of (±)-**S5i**, obtained by chemical synthesis from (±)-**5i** (page S45, vide infra).<sup>22</sup> <sup>1</sup>H NMR (500 MHz, CDCl<sub>3</sub>) δ 8.27 (s, 1H), 8.20 (d, *J* = 8.3, 1H), 7.41 (d, *J* = 8.3 Hz, 1H), 5.62 (dd, *J* = 53.2, 12.2, 1H), 3.40 (t, *J* = 17.6 Hz, 1H), 3.07 (dd, *J* = 23.9, 17.1 Hz, 1H), 1.68 (d, *J* = 22.0 Hz, 3H); <sup>13</sup>C NMR (125.7 MHz, CDCl<sub>3</sub>) δ 148.0, 146.9 (dd, *J* = 5.8, 1.9 Hz), 139.8 (d, *J* = 19.2 Hz), 126.4, 125.4, 120.8, 100.3 (dd, *J* = 189.9, 14.4 Hz), 96.7–95.0 (m), 42.3 (d, *J* = 24.0 Hz), 21.8 (d, *J* = 24.9 Hz); <sup>19</sup>F NMR (470.4 MHz, CDCl<sub>3</sub>) δ –163.8––164.1 (m, 1F), –196.1 (d, *J* = 53.7 Hz, 1F); FTIR (thin film) ν 2991 (w), ν 1523 (s), 1346 (s), 1078 (m), 799 (m), 737 (s) cm<sup>-1</sup>; HRMS (ESI-TOF) Calc'd for C<sub>10</sub>H<sub>9</sub>F<sub>2</sub>NO<sub>2</sub> [M+H]<sup>+</sup>: 214.0674; found 214.0676.

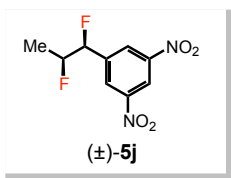

(±)-**5j**: Prepared according to general procedure C using (*E*)-1,3-dinitro-5-(prop-1-en-1-yl)benzene (**4j**, 250 mg, 1.20 mmol) with the following modification: a solution of the substrate in dichloromethane (6.0 mL) was added over 2 h via syringe pump to a biphasic mixture of *m*-chloroperbenzoic acid (*m*CPBA, 77% by weight, 350 mg, 1.56 mmol, 1.30 equiv), pyridinium poly(hydrogen fluoride) (pyr•9HF, 3.12 mL, 120 mmol, 100 equiv HF), catalyst **1b** (105 mg, 0.240 mmol, 20.0 mol %), and dichloromethane (6.0 mL) at room temperature. The resulting biphasic mixture was vigorously stirred for 10 h prior to work-up. After work-up, the crude residue was purified by flash column chromatography on silica gel (0 to 25% dichloromethane in hexanes) to give (±)-**5j** (106 mg, 36%) as a colorless oil. The diastereomeric ratio of the product was determined to be >19:1 by <sup>1</sup>H and <sup>19</sup>F NMR analysis. The connectivity and relative stereochemistry of (±)-**5j** were secured by X-ray diffraction analysis of a single crystal of (±)-**S5j**, obtained by chemical synthesis from (±)-**5j** (page S56, vide infra).<sup>23</sup> <sup>1</sup>H NMR (500 MHz, CDCl<sub>3</sub>) δ 9.07 (d, *J* = 2.0 Hz, 1H), 8.58 (d, *J* = 2.0 Hz, 2H), 5.66 (ddd, *J* = 45.0, 19.1, 2.9 Hz, 1H), 4.98 (qddd, *J* = 6.3, 46.0, 19.6, 2.9 Hz, 1H), 1.49 (ddd, *J* = 23.9, 6.3, 1.0 Hz, 1H); <sup>13</sup>C NMR (125.7 MHz, CDCl<sub>3</sub>) δ 148.8, 140.5 (dd, *J* = 23.0, 2.9 Hz), 126.6 (d, *J* = 8.6 Hz), 119.2, 92.0 (dd, *J* = 185.1, 22.1 Hz), 89.4 (dd, *J* = 179.3, 24.9 Hz), 16.1 (dd, *J* = 23.0, 4.8 Hz); <sup>19</sup>F NMR (470.4 MHz, CDCl<sub>3</sub>) δ –189.6––190.0 (m, 1F), –197.4 (ddd, *J* = 45.0, 19.6, 11.6 Hz, 1F); FTIR (thin film) ν 3108 (w), 2919 (w), 1545 (s), 1526 (s), 1344 (s), 1276 (s), 992 (m), 730 (s) cm<sup>-1</sup>; HRMS (ESI-TOF) Calc'd for C<sub>9</sub>H<sub>8</sub>F<sub>2</sub>N<sub>2</sub>O<sub>4</sub> [M+Cl]<sup>-</sup>: 281.0146; found 281.0133.

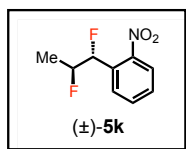

(±)-**5k**: Prepared according to general procedure C using (*E*)-1-nitro-2-(prop-1-en-1-yl)benzene<sup>24</sup> (**4k**, 200 mg, 1.23 mmol) with the following modification: after addition of the substrate solution over 2 h via syringe pump, the resulting biphasic mixture was vigorously stirred for 10 h prior to work-up. After work-up, the crude residue was purified by flash column chromatography on silica gel (0 to 1% ethyl acetate in hexanes) to give (±)-**5k** (194 mg, 79%) as a light yellow oil. The diastereomeric ratio of the product was determined to be >19:1 by <sup>1</sup>H and <sup>19</sup>F NMR analysis. <sup>1</sup>H NMR (500 MHz, CDCl<sub>3</sub>) δ 8.13 (d, *J* = 8.3 Hz, 1H), 7.77 (t, *J* = 7.3 Hz, 1H), 7.74 (td, *J* = 7.8, 1.0 Hz, 1H), 7.56 (td, *J* = 8.3, 1.5 Hz, 1H), 6.41 (ddd, *J* = 48.4, 13.6, 2.9 Hz, 1H), 5.00 (qddd, *J* = 6.8, 46.0, 21.0, 2.9 Hz, 1H), 1.36 (ddd, *J* = 24.5, 6.8, 1.5 Hz, 1H); <sup>13</sup>C NMR (125.7 MHz, CDCl<sub>3</sub>) δ 147.2, 134.2, 131.7 (dd, *J* = 22.1, 7.7 Hz), 129.8, 128.4 (d, *J* = 14.4 Hz), 125.2, 90.5 (dd, *J* =

180.3, 24.9 Hz), 90.2 (dd,  $J = 176.4, 24.9$  Hz), 14.6 (dd,  $J = 23.0, 6.7$  Hz);  $^{19}\text{F}$  NMR (470.4 MHz,  $\text{CDCl}_3$ )  $\delta$  -179.7—180.0 (m, 1F), -195.2—195.5 (m, 1F); FTIR (thin film)  $\nu$  2994 (w), 2927 (w), 1527 (s), 1347 (s), 1197 (m), 1069 (m), 981 (m), 739 (m)  $\text{cm}^{-1}$ ; HRMS (ESI-TOF) Calc'd for  $\text{C}_9\text{H}_9\text{F}_2\text{NO}_2$   $[\text{M}-\text{F}]^+$ : 182.0612; found 182.0609.

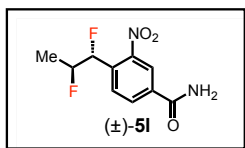

(±)-**5l**: Prepared according to general procedure C using (*E*)-3-Nitro-4-(prop-1-en-1-yl)benzamide (**4l**, 400 mg, 1.94 mmol) with the following modification: instead of adding the substrate solution via syringe pump, (*E*)-3-Nitro-4-(prop-1-en-1-yl)benzamide (**4l**) was added as a solid in five equal portions over 2 h, and the resulting biphasic mixture was vigorously stirred for 10 h prior to work-up. After work-up, the crude residue was purified by flash column chromatography on silica gel (10 to 40% ethyl acetate in hexanes) to give (±)-**5l** (310 mg, 65%) as an off-white solid. The diastereomeric ratio of the product was determined to be >19:1 by  $^1\text{H}$  and  $^{19}\text{F}$  NMR analysis. The connectivity and relative stereochemistry of (±)-**5l** were secured by X-ray diffraction analysis of a single crystal (page S65, *vide infra*).<sup>25</sup>  $^1\text{H}$  NMR (500 MHz,  $\text{CDCl}_3$ )  $\delta$  8.57 (s, 1H), 8.18 (dd,  $J = 8.3, 1.5$  Hz, 1H), 7.89 (d,  $J = 7.8$  Hz, 1H), 6.44 (ddd,  $J = 48.3, 12.7, 2.9$  Hz, 1H), 6.58–6.07 (br-s, 2H), 4.96 (qddd,  $J = 7.3, 45.9, 19.5, 2.9$  Hz, 1H), 1.38 (ddd,  $J = 24.9, 7.3, 1.0$  Hz, 3H);  $^{13}\text{C}$  NMR (125.7 MHz,  $\text{CDCl}_3$ )  $\delta$  166.5, 147.3, 135.2, 135.1 (dd,  $J = 22.1, 6.7$  Hz), 132.7, 129.2 (dd,  $J = 16.3, 1.9$  Hz), 124.2, 90.3 (dd,  $J = 181.2, 25.9$  Hz), 90.1 (dd,  $J = 177.4, 25.9$  Hz), 15.1 (dd,  $J = 23.0, 6.7$  Hz);  $^{19}\text{F}$  NMR (470.4 MHz,  $\text{CDCl}_3$ )  $\delta$  -180.5—180.9 (m, 1F), -194.4 (ddd,  $J = 48.1, 19.9, 14.9$  Hz, 1F); FTIR (thin film)  $\nu$  3350 (br-m), 3196 (br-m), 2992 (w), 1664 (s), 1623 (m), 1535 (s), 1349 (s), 1068 (m)  $\text{cm}^{-1}$ ; HRMS (ESI-TOF) Calc'd for  $\text{C}_{10}\text{H}_{11}\text{F}_2\text{N}_2\text{O}_3$   $[\text{M}+\text{H}]^+$ : 245.0732; found 245.0731.

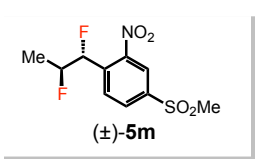

(±)-**5m**: Prepared according to general procedure D using (*E*)-4-(methylsulfonyl)-2-nitro-1-(prop-1-en-1-yl)benzene<sup>26</sup> (**4m**, 150 mg, 0.622 mmol). After work-up, the crude residue was purified by flash column chromatography on silica gel (0 to 100% dichloromethane in hexanes) to give (±)-**5m** (120 mg, 69%) as a white solid. The diastereomeric ratio of the product was determined to be 16:1 by  $^1\text{H}$  and  $^{19}\text{F}$  NMR analysis. The connectivity and relative stereochemistry of (±)-**5m** were secured by X-ray diffraction analysis of a single crystal (page S69, *vide infra*).<sup>27</sup>  $^1\text{H}$  NMR (500 MHz,  $\text{CDCl}_3$ , \* denotes minor diastereomer resonance)  $\delta$  8.66\* (s, 1H), 8.64 (s, 1H), 8.26 (dd,  $J = 7.8, 1.5$  Hz, 1H), 8.26–8.23\* (m, 1H), 8.04\* (d,  $J = 8.3$  Hz, 1H), 8.01 (d,  $J = 8.3$  Hz, 1H), 6.43 (ddd,  $J = 47.8, 12.2, 3.4$  Hz, 1H), 6.13\* (dd,  $J = 45.4, 23.4$  Hz, 1H), 5.14–4.94\* (m, 1H), 5.04–4.84 (m, 1H), 3.14 (s, 3H), 3.14\* (s, 3H), 1.61\* (dd,  $J = 23.9, 6.3$  Hz, 3H), 1.38 (ddd,  $J = 24.4, 5.9, 1.0$  Hz, 3H);  $^{13}\text{C}$  NMR (125.7 MHz,  $\text{CDCl}_3$ , \* denotes minor diastereomer resonance)  $\delta$  147.5 (d,  $J = 3.8$  Hz), 146.8\*, 142.6, 142.3\*, 138.2\* (d,  $J = 23.0$  Hz), 137.0 (d,  $J = 5.8, 21.1$  Hz), 132.3 (d,  $J = 1.9$  Hz), 132.2\*, 131.4\* (d,  $J = 15.3$  Hz), 130.2 (dd,  $J = 15.4, 1.9$  Hz), 124.6, 124.4\*, 90.0 (dd,  $J = 181.2, 24.9$  Hz), 89.9 (dd,  $J = 177.4, 25.9$  Hz), 89.7\* (dd,  $J = 183.2, 18.3$  Hz), 89.1\* (dd,  $J = 178.4, 21.1$  Hz), 44.4, 44.4\*, 16.9\* (dd,  $J = 23.0, 4.8$  Hz), 15.3 (dd,  $J = 23.0, 5.8$  Hz);  $^{19}\text{F}$  NMR (470.4 MHz,  $\text{CDCl}_3$ , \* denotes minor diastereomer resonance)  $\delta$  -181.2—181.5 (m, 1F), -193.0—193.3\* (m, 1F), -193.3 (ddd,  $J = 48.1, 18.3, 15.0$  Hz, 1F), -199.1\* (ddd,  $J = 46.4, 24.9, 10.0$  Hz, 1F); FTIR (thin film)  $\nu$  3085 (w), 2928 (w), 1536 (s), 1351 (s), 1314 (s), 1152 (s), 1068 (m), 777 (m)  $\text{cm}^{-1}$ ; HRMS (ESI-TOF) Calc'd for  $\text{C}_{10}\text{H}_{12}\text{F}_2\text{NO}_4\text{S}$   $[\text{M}+\text{H}]^+$ : 280.0450; found 280.0441.

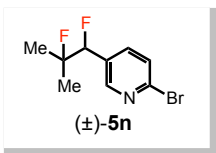

(±)-**5n**: Prepared according to general procedure D using 2-bromo-5-(2-methylprop-1-en-1-yl)pyridine<sup>28</sup> (**4n**, 200 mg, 0.943 mmol) with the following modification: instead of the standard work-up, the reaction

mixture was diluted with dichloromethane (20 mL) and was cooled to  $-78\text{ }^{\circ}\text{C}$ . Aqueous NaOH solution (4 M, 30 mL) was added, and the resulting biphasic mixture was allowed to warm to room temperature with vigorous stirring. The layers were separated, and the aqueous layer was extracted with diethyl ether ( $2 \times 100\text{ mL}$ ). The combined organic layers were sequentially washed with a saturated aqueous copper sulfate solution (100 mL) and brine (100 mL), were dried over anhydrous  $\text{MgSO}_4$ , were filtered, and were concentrated under reduced pressure. The residue was purified by flash column chromatography on silica gel (0 to 5% ethyl acetate in hexanes) to give ( $\pm$ )-**5n** (192 mg, 81%) as a colorless oil.  $^1\text{H NMR}$  (500 MHz,  $\text{CDCl}_3$ )  $\delta$  8.34 (s, 1H), 7.61 (d,  $J = 8.3\text{ Hz}$ , 1H), 7.53 (d,  $J = 8.3\text{ Hz}$ , 1H), 5.29 (dd,  $J = 44.4, 13.7\text{ Hz}$ , 1H), 1.41 (dd,  $J = 9.8, 2.0\text{ Hz}$ , 3H), 1.36 (dd,  $J = 9.8, 1.9\text{ Hz}$ , 3H);  $^{13}\text{C NMR}$  (125.7 MHz,  $\text{CDCl}_3$ )  $\delta$  148.8 (d,  $J = 6.7\text{ Hz}$ ), 142.9, 137.4 (dd,  $J = 6.7, 2.9\text{ Hz}$ ), 130.9 (d,  $J = 22.1\text{ Hz}$ ), 128.0, 94.5 (dd,  $J = 173.6, 24.0\text{ Hz}$ ), 94.1 (dd,  $J = 181.2, 26.7\text{ Hz}$ ), 23.6 (dd,  $J = 24.0, 2.9\text{ Hz}$ ), 22.3 (dd,  $J = 24.0, 2.9\text{ Hz}$ );  $^{19}\text{F NMR}$  (470.4 MHz,  $\text{CDCl}_3$ )  $\delta$   $-152.9$ – $-153.2$  (m, 1F),  $-190.4$  (dd,  $J = 44.8, 10.0\text{ Hz}$ , 1F); FTIR (thin film)  $\nu$  2988 (w), 2939 (w), 1585 (m), 1563 (m), 1457 (s), 1387 (m), 1088 (s)  $\text{cm}^{-1}$ ; HRMS (ESI-TOF) Calc'd for  $\text{C}_9\text{H}_{11}\text{BrF}_2\text{N}$   $[\text{M}+\text{H}]^+$ : 250.0037; found 250.0037.

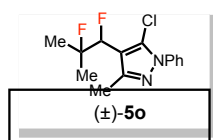

( $\pm$ )-**5o**. A modified procedure was used. An 8 mL low density polyethylene tube equipped with a stir bar was charged with **4o** (257 mg, 1 equiv, 1.04 mmol), **1b** (92.0 mg, 0.21 mmol, 20 mol %), *m*CPBA (303 mg, 1.30 equiv, 1.35 mmol) and pyr•9HF (2.72 mL, 100 equiv of HF, 104.0 mmol). The resulting mixture was vigorously stirred for 12 hours, after which it was cooled to  $-78\text{ }^{\circ}\text{C}$  and 4 M aqueous NaOH was added until pH = 14. Upon completion of addition, the mixture was allowed to warm to room temperature with stirring. The biphasic mixture was added to a 500 mL separatory funnel, diluted with water (150 mL), and washed with ethyl acetate ( $3 \times 150\text{ mL}$ ). The combined organic layers were dried over anhydrous  $\text{MgSO}_4$  and were concentrated under reduced pressure. The resulting residue was purified by flash column chromatography on silica gel (0% to 70% ether in hexanes) to give a colorless oil which solidified on standing (151 mg, 51%).  $^1\text{H NMR}$  (500 MHz,  $\text{CDCl}_3$ )  $\delta$  7.54–7.38 (m, 5H), 5.32 (dd,  $J = 20.5, 43.0\text{ Hz}$ , 1H), 2.39 (s, 3H), 1.55 (dd,  $J = 21.5, 1.5\text{ Hz}$ , 3H), 1.38 (dd,  $J = 21.0, 1.0\text{ Hz}$ , 3H);  $^{13}\text{C NMR}$  (125.7 MHz,  $\text{CDCl}_3$ )  $\delta$  149.5, 138.2, 129.2, 128.5, 126.5 (d,  $J = 7.7\text{ Hz}$ ), 125.2, 112.7 (m), 96.4 (dd,  $J = 175.5, 24.0\text{ Hz}$ ), 91.3 (dd,  $J = 177.4, 24.0\text{ Hz}$ ), 23.4–23.1 (m), 23.4–23.1 (m), 14.21–14.17 (m);  $^{19}\text{F NMR}$  (470.4 MHz,  $\text{CDCl}_3$ )  $\delta$   $-151.4$ – $-151.9$  (m, 1F),  $-192.6$  (dd,  $J = 44.1, 13.1\text{ Hz}$ , 1F); FTIR (thin film)  $\nu$  2987 (w), 1555 (m), 1502 (m), 1008 (m), 760 (s), 692 (s)  $\text{cm}^{-1}$ ; HRMS (ESI-TOF) Calc'd for  $\text{C}_{14}\text{H}_{15}\text{ClF}_2\text{N}_2$   $[\text{M}+\text{H}]^+$ : 285.0965; found 285.0970.

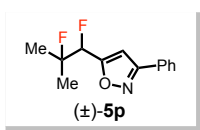

( $\pm$ )-**5p**. A modified procedure was used. An 8 mL low density polyethylene tube equipped with a stir bar was charged with **4p** (207 mg, 1.04 mmol, 1 equiv), **1b** (92.0 mg, 0.210 mmol, 20.0 mol %), *m*-chloroperbenzoic acid (*m*CPBA, 77% by weight, 303 mg, 1.35 mmol, 1.30 equiv) and pyridinium poly(hydrogen fluoride) (pyr•9HF, 2.72 mL, 104 mmol, 100 equiv HF). The resulting mixture was vigorously stirred for 24 hours, after which additional *m*CPBA (77% by weight, 152 mg, 0.65 equiv, 0.68 mmol) was added as a solid. After 12 hours, the reaction was cooled to  $-78\text{ }^{\circ}\text{C}$  and 4 M aqueous NaOH solution was added until pH = 14. Upon completion of addition, the mixture was allowed to warm to room temperature with stirring. The biphasic mixture was added to a 500 mL separatory funnel, diluted with water (150 mL), and extracted with ethyl acetate ( $3 \times 150\text{ mL}$ ). The combined organic layers were dried over anhydrous  $\text{MgSO}_4$  and were concentrated under reduced pressure. The residue was purified by flash column chromatography on silica gel with a short plug of alumina loaded on top of the silica gel (0% to 70% ether in hexanes) to give ( $\pm$ )-**5p** (65 mg, 26%) as a colorless oil.  $^1\text{H NMR}$  (500 MHz,  $\text{CDCl}_3$ )  $\delta$  7.84–7.82 (m, 2H), 7.49–7.46 (m, 3H), 6.76 (s, 1H), 5.50 (dd,  $J = 45.4, 15.6\text{ Hz}$ , 1H),



1.54–1.46 (m, 6H);  $^{13}\text{C}$  NMR (125.7 MHz,  $\text{CDCl}_3$ )  $\delta$  167.1–166.8 (m), 162.7, 130.5, 129.2, 128.6, 127.1, 102.5–102.4 (m), 94.3 (dd,  $J = 176.5, 22.1$ ), 89.6 (dd,  $J = 182.2, 25.9$  Hz), 23.0 (dd,  $J = 24.0, 4.8$  Hz), 22.6–22.4 (m);  $^{19}\text{F}$  NMR (470.4 MHz,  $\text{CDCl}_3$ )  $\delta$  –150.9––151.3 (m, 1F), –189.8 (dd,  $J = 42.9, 11.9$  Hz, 1F); FTIR (thin film)  $\nu$  2991 (w), 1610 (w), 768 (s), 692 (s)  $\text{cm}^{-1}$ ; HRMS (ESI-TOF) Calc'd for  $\text{C}_{13}\text{H}_{13}\text{F}_2\text{NO}$   $[\text{M}+\text{H}]^+$ : 238.1038; found 238.1044.

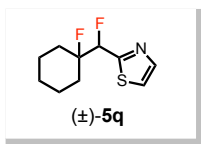

(±)-**5q**: Prepared according to general procedure D using 2-(cyclohexylidenemethyl)thiazole (**4q**, 200 mg, 1.12 mmol). After work-up, the crude residue was purified by flash column chromatography on silica gel (0 to 10% ethyl acetate in hexanes) to give (±)-**5q** (133 mg, 55%) as a light yellow oil.  $^1\text{H}$  NMR (500 MHz,  $\text{CDCl}_3$ )  $\delta$  7.85–7.81 (m, 1H), 7.46 (d,  $J = 3.4$  Hz, 1H), 5.64 (dd,  $J = 44.5, 19.1$  Hz, 1H), 2.19–2.09 (m, 1H), 1.80–1.39 (m, 8H), 1.32–1.20 (m, 1H);  $^{13}\text{C}$  NMR (125.7 MHz,  $\text{CDCl}_3$ )  $\delta$  164.4 (dd,  $J = 26.1, 4.2$  Hz), 142.5, 121.1, 95.1 (dd,  $J = 180.3, 21.4$  Hz), 94.3 (dd,  $J = 180.3, 22.1$  Hz), 31.1 (dd,  $J = 22.1, 4.8$  Hz), 30.7 (dd,  $J = 21.1, 2.9$  Hz), 25.2, 21.4 (d,  $J = 2.9$  Hz), 21.2 (d,  $J = 2.0$  Hz);  $^{19}\text{F}$  NMR (470.4 MHz,  $\text{CDCl}_3$ )  $\delta$  –170.4––171.5 (m, 1F), –184.6 (dd,  $J = 44.8, 11.6$  Hz, 1F); FTIR (thin film)  $\nu$  2935 (m), 2865 (w), 1449 (m), 1205 (w), 1146 (m), 1023 (m), 970 (m)  $\text{cm}^{-1}$ ; HRMS (ESI-TOF) Calc'd for  $\text{C}_{10}\text{H}_{14}\text{F}_2\text{SN}$   $[\text{M}+\text{H}]^+$ : 218.0810; found 218.0811.

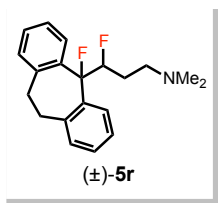

(±)-**5r**: A modified procedure was used. An 8 mL low density polyethylene tube equipped with a stir bar was charged with **4r** (288 mg, 1.04 mmol, 1 equiv), **1b** (92.0 mg, 0.210 mmol, 20.0 mol %), and pyridinium poly(hydrogen fluoride) ( $\text{pyr}\cdot 9\text{HF}$ , 2.72 mL, 104 mmol, 100 equiv HF). The resulting mixture was vigorously stirred and *m*-chloroperbenzoic acid (*m*CPBA, 77% by weight, 152 mg, 0.680 mmol, 0.650 equiv) was added as a solid. After 30 minutes, additional *m*CPBA (77% by weight, 152 mg, 0.680 mmol, 0.650 equiv) was added as a solid. After 12 hours, the reaction was cooled to  $-78^\circ\text{C}$  and 4 M aqueous NaOH solution was added until pH = 14. Upon completion of addition, the mixture was allowed to warm to room temperature with stirring. The biphasic mixture was added to a 500 mL separatory funnel, diluted with water (150 mL), and extracted with ethyl acetate (2  $\times$  200 mL). The combined organic layers were dried over anhydrous  $\text{MgSO}_4$  and were concentrated under reduced pressure. The residue was purified by flash column chromatography on silica gel with a short plug of alumina loaded on top of the silica gel (0% to 10% methanol in dichloromethane) to give (±)-**5r** (135 mg, 41%) as a light brown oil.  $^1\text{H}$  NMR (500 MHz,  $\text{CDCl}_3$ )  $\delta$  7.78 (dd,  $J = 13.7, 7.3$  Hz, 2H), 7.31–7.25 (m, 4H), 7.19–7.16 (m, 2H), 5.45 (dddd,  $J = 46.4, 24.9, 9.8, 2.0$  Hz, 1H), 3.53–3.41 (m, 2H), 3.04–2.97 (m, 2H), 2.49–2.43 (m, 1H), 2.28–2.19 (m, 1H), 2.12 (s, 6H), 1.96–1.91 (m, 1H), 1.70–1.60 (m, 1H);  $^{13}\text{C}$  NMR (125.7 MHz,  $\text{CDCl}_3$ )  $\delta$  137.8–137.2 (m), 130.7–130.6, 128.5 (d,  $J = 46.0$  Hz), 127.4–127.2 (m), 126.7 (d,  $J = 3.8$  Hz), 126.1 (d,  $J = 3.8$  Hz), 126.0 (d,  $J = 23.0$  Hz), 99.1 (dd,  $J = 184.1, 20.1$  Hz), 93.9 (dd,  $J = 185.1, 26.9$  Hz), 55.5 (d,  $J = 2.9$  Hz), 45.4, 33.7, 27.6–27.4 (m);  $^{19}\text{F}$  NMR (470.4 MHz,  $\text{CDCl}_3$ )  $\delta$  –150.9––151.3 (m, 1F), –189.7––189.8 (m, 1F); FTIR (thin film)  $\nu$  2941 (w), 2766 (w), 1444 (w), 753 (s), 724 (w)  $\text{cm}^{-1}$ ; HRMS (ESI-TOF) Calc'd for  $\text{C}_{20}\text{H}_{23}\text{F}_2\text{N}$   $[\text{M}+\text{H}]^+$ : 316.1871; found 316.1879.

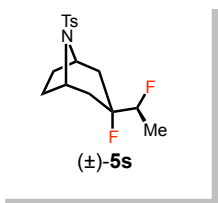

(±)-**5s**: A modified procedure was used. An 8 mL low density polyethylene tube equipped with a stir bar was charged with **4s** (152 mg, 0.520 mmol, 1 equiv), **1b** (46.0 mg, 0.100 mmol, 20.0 mol %), and pyridinium poly(hydrogen fluoride) ( $\text{pyr}\cdot 9\text{HF}$ , 0.300 mL, 11.5 mmol, 22.0 equiv HF). The resulting mixture was vigorously stirred and *m*-chloroperbenzoic acid (*m*CPBA, 77% by weight, 64 mg, 0.29 mmol, 0.55 equiv) was added as a

solid. After 30 minutes, additional *m*CPBA (77% by weight, 64 mg, 0.29 mmol, 0.55 equiv) was added as a solid. After 24 hours, the reaction mixture was cooled to  $-78\text{ }^{\circ}\text{C}$ , and approximately 7.5 grams of basic alumina was added slowly to the rapidly stirred mixture. Upon completion of addition, the slurry was allowed to warm to room temperature with stirring and was filtered through a plug of basic alumina. The filter cake was extracted with dichloromethane. The filtrate was concentrated under reduced pressure, and the diastereomeric ratio of the crude product was determined to be 10:1 by  $^1\text{H}$  and  $^{19}\text{F}$  NMR analysis. The crude product was purified by flash column chromatography on silica gel (5 to 40% ethyl acetate in hexanes) to give ( $\pm$ )-**5s** (46 mg, 27%) as a white crystalline solid. The diastereomeric ratio of the purified product was determined to be 10:1 by  $^1\text{H}$  and  $^{19}\text{F}$  NMR analysis. The connectivity and relative stereochemistry of ( $\pm$ )-**5s** were secured by X-ray diffraction analysis of a single crystal (page S73, vide infra).<sup>29</sup>  $^1\text{H}$  NMR (500 MHz,  $\text{CDCl}_3$ , \* denotes minor diastereomer resonance)  $\delta$  7.80\* (d,  $J = 7.8$  Hz, 2H), 7.76 (d,  $J = 8.3$  Hz, 2H), 7.30 (d,  $J = 7.8$  Hz, 2H), 4.38–4.25 (m, 3H), 2.44 (s, 3H), 2.19–1.36 (m, 8H), 1.29 (dd,  $J = 24.4, 6.3$  Hz, 3H);  $^{13}\text{C}$  NMR (125.7 MHz,  $\text{CDCl}_3$ , \* denotes minor diastereomer resonance)  $\delta$  143.8, 137.2, 129.9, 127.6\*, 127.5, 95.3–93.8 (m), 93.1 (dd,  $J = 176.5, 25.9$  Hz), 56.2\*, 55.3 (dd,  $J = 15.3, 1.9$  Hz), 39.2–38.6 (m), 32.5\*, 29.9\*, 29.2\*, 28.0\*, 28.0–27.9 (m), 21.8, 14.2 (dd,  $J = 23.0, 3.8, 23.0$  Hz);  $^{19}\text{F}$  NMR (470.4 MHz,  $\text{CDCl}_3$ , \* denotes minor diastereomer resonance)  $\delta$  -140.9–-141.1\* (m, 1F), -160.4–-160.6 (m, 1F), -182.1–-182.4\* (m, 1F), -185.6–-185.9 (m, 1F); FTIR (thin film)  $\nu$  2928 (w), 1338 (m), 1159 (s), 686 (m), 673 (m)  $\text{cm}^{-1}$ ; HRMS (ESI-TOF) Calc'd for  $\text{C}_{16}\text{H}_{21}\text{F}_2\text{NO}_2\text{S}$   $[\text{M}+\text{H}]^+$ : 330.1334; found 330.1341.

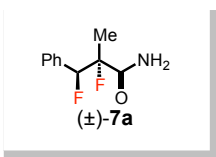

( $\pm$ )-**7a**: Prepared according to general procedure E using (*E*)-2-methyl-3-phenylacrylamide<sup>30</sup> (**6a**, 540 mg, 3.35 mmol). After work-up, the crude residue was purified by flash column chromatography on silica gel (0 to 5% ethyl acetate in dichloromethane) to give ( $\pm$ )-**7a** (470 mg, 70%) as a white solid. The diastereomeric ratio of the product was determined to be >19:1 by  $^1\text{H}$  and  $^{19}\text{F}$  NMR analysis. The connectivity and relative stereochemistry of ( $\pm$ )-**7a** were secured by X-ray diffraction analysis of a single crystal (page S78, vide infra).<sup>31</sup>  $^1\text{H}$  NMR (500 MHz,  $\text{CDCl}_3$ )  $\delta$  7.40–7.34 (m, 5H), 6.01–5.90 (br-s, 1H), 5.71 (dd,  $J = 44.0, 25.4$  Hz, 1H), 5.25–5.10 (br-s, 1H), 1.81 (dd,  $J = 22.0, 1.5$  Hz, 3H);  $^{13}\text{C}$  NMR (125.7 MHz,  $\text{DMSO}-d_6$ )  $\delta$  170.9 (dd,  $J = 21.1, 6.7$  Hz), 134.3 (d,  $J = 21.1$  Hz), 128.9, 128.0, 127.3 (d,  $J = 6.7$  Hz), 96.9 (dd,  $J = 195.6, 22.1$  Hz), 95.2 (dd,  $J = 179.3, 20.1$  Hz), 40.7 (dd,  $J = 24.9, 5.8$  Hz);  $^{19}\text{F}$  NMR (470.4 MHz,  $\text{CDCl}_3$ )  $\delta$  -168.8–-169.2 (m, 1F), -195.8 (dd,  $J = 44.8, 10.0$  Hz, 1F); FTIR (thin film)  $\nu$  3394 (br-m), 3209 (w), 1659 (s), 1455 (m), 1192 (w), 1113 (m), 1038 (m)  $\text{cm}^{-1}$ ; HRMS (ESI-TOF) Calc'd for  $\text{C}_{10}\text{H}_{12}\text{F}_2\text{NO}$   $[\text{M}+\text{H}]^+$ : 200.0881; found 200.0881.

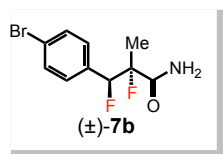

( $\pm$ )-**7b**: Prepared according to general procedure E using (*E*)-3-(4-Bromophenyl)-2-methylacrylamide (**6b**, 300 mg, 1.25 mmol). After work-up, the crude residue was purified by flash column chromatography on silica gel (0 to 10% ethyl acetate in dichloromethane) to give ( $\pm$ )-**7b** (261 mg, 75%) as a white solid. The diastereomeric ratio of the product was determined to be >19:1 by  $^1\text{H}$  and  $^{19}\text{F}$  NMR analysis. The connectivity and relative stereochemistry of ( $\pm$ )-**7b** were secured by conversion of ( $\pm$ )-**7b** to ( $\pm$ )-**7a** by free radical debromination.<sup>32</sup>  $^1\text{H}$  NMR (500 MHz,  $\text{CDCl}_3$ )  $\delta$  7.49 (d,  $J = 8.3$  Hz, 2H), 7.24 (d,  $J = 8.3$  Hz, 2H), 6.05–5.95 (br-s, 1H), 5.67 (dd,  $J = 43.5, 25.0$  Hz, 1H), 5.58–5.48 (br-s, 1H), 1.79 (dd,  $J = 22.5, 1.5$  Hz, 3H);  $^{13}\text{C}$  NMR (125.7 MHz,  $\text{CDCl}_3$ )  $\delta$  172.0 (dd,  $J = 21.1, 6.7$  Hz), 133.0 (dd,  $J = 23.0, 1.9$  Hz), 131.6, 129.2 (d,  $J = 7.7$  Hz), 123.6, 98.0 (dd,  $J = 197.5, 24.0$  Hz), 93.7 (dd,  $J = 185.1, 19.2$  Hz), 20.3 (dd,  $J = 24.9, 5.8$  Hz);  $^{19}\text{F}$  NMR (470.4 MHz,  $\text{CDCl}_3$ )  $\delta$  -169.1–-169.4 (m, 1F), -196.3 (dd,  $J = 43.1, 10.0$  Hz, 1F); FTIR (thin film)  $\nu$  3397 (br-m), 3209 (br-m), 2987 (w), 1664

(s), 1492 (m), 1406 (m), 1112 (m)  $\text{cm}^{-1}$ ; HRMS (ESI-TOF) Calc'd for  $\text{C}_{10}\text{H}_{11}\text{BrF}_2\text{NO}$   $[\text{M}+\text{H}]^+$ : 277.9987; found 277.9981.

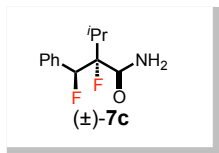

**(±)-7c:** Prepared according to general procedure E using (*E*)-2-benzylidene-3-methylbutanamide (**6c**, 200 mg, 1.06 mmol). After work-up, the crude residue was purified by flash column chromatography on silica gel (0 to 20% ethyl acetate in hexanes) to give (±)-7c (149 mg, 62%) as a white solid. The diastereomeric ratio of the product was determined to be >19:1 by  $^1\text{H}$  and  $^{19}\text{F}$  NMR analysis. The connectivity and relative stereochemistry of (±)-7c were secured by X-ray diffraction analysis of a single crystal (page S82, vide infra).<sup>33</sup>  $^1\text{H}$  NMR (500 MHz,  $\text{CDCl}_3$ )  $\delta$  7.40–7.36 (m, 2H), 7.36–7.33 (m, 3H), 5.96 (dd,  $J = 44.0, 26.9$  Hz, 1H), 5.95–5.90 (br-s, 1H), 5.40–5.30 (br-s, 1H), 2.63–2.49 (m, 1H), 1.28 (d,  $J = 6.9$  Hz, 3H), 1.09 (d,  $J = 6.8$  Hz, 3H);  $^{13}\text{C}$  NMR (125.7 MHz,  $\text{CDCl}_3$ )  $\delta$  170.5 (dd,  $J = 21.1, 7.7$  Hz), 134.5 (d,  $J = 21.1$  Hz), 129.1, 128.3, 127.8 (d,  $J = 5.8$  Hz), 102.5 (dd,  $J = 198.5, 23.0$  Hz), 92.8 (dd,  $J = 184.1, 19.2$  Hz), 32.6 (dd,  $J = 23.0, 3.8$  Hz), 17.8 (d,  $J = 8.6$  Hz), 17.1 (d,  $J = 1.9$  Hz);  $^{19}\text{F}$  NMR (470.4 MHz,  $\text{CDCl}_3$ )  $\delta$  -174.1–-174.3 (m, 1F), -197.3 (dd,  $J = 44.8, 10.0$  Hz, 1F); FTIR (thin film)  $\nu$  3480 (br-m), 3311 (br-m), 2973 (w), 1681 (s), 1417 (m), 1136 (m), 1044 (m), 1020 (s)  $\text{cm}^{-1}$ ; HRMS (ESI-TOF) Calc'd for  $\text{C}_{12}\text{H}_{16}\text{F}_2\text{NO}$   $[\text{M}+\text{H}]^+$ : 228.1194; found 228.1189.

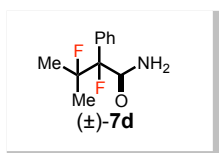

**(±)-7d:** Prepared according to general procedure E using 3-methyl-2-phenylbut-2-enamide<sup>34</sup> (**6d**, 1.00 g, 5.71 mmol). After work-up, the crude residue was purified by flash column chromatography on silica gel (0 to 20% ethyl acetate in hexanes) to give (±)-7d (1.00 g, 82%) as a white solid.  $^1\text{H}$  NMR (500 MHz,  $\text{CDCl}_3$ )  $\delta$  7.77–7.73 (m, 2H), 7.39–7.35 (m, 3H), 6.62–6.47 (br-s, 1H), 6.43–6.28 (br-s, 1H), 1.56 (dd,  $J = 21.5, 1.0$  Hz, 3H), 1.45 (dd,  $J = 22.0, 1.5$  Hz, 3H);  $^{13}\text{C}$  NMR (125.7 MHz,  $\text{CDCl}_3$ )  $\delta$  171.0 (dd,  $J = 22.9, 3.8$  Hz), 134.4 (dd,  $J = 22.9, 2.9$  Hz), 129.1, 128.1 (d,  $J = 1.9$  Hz), 126.3 (dd,  $J = 12.4, 1.9$  Hz), 99.1 (dd,  $J = 195.5, 22.9$  Hz), 97.1 (dd,  $J = 181.2, 23.8$  Hz), 23.1 (dd,  $J = 11.4, 4.8$  Hz), 22.9 (dd,  $J = 12.4, 5.7$  Hz);  $^{19}\text{F}$  NMR (470.4 MHz,  $\text{CDCl}_3$ )  $\delta$  -148.6 (sepd,  $J = 22.1, 10.0$  Hz, 1F), -162.0–-162.2 (m, 1F); FTIR (thin film)  $\nu$  3489 (br-m), 3293 (br-m), 2988 (w), 1691 (s), 1449 (m), 1385 (m), 1048 (s)  $\text{cm}^{-1}$ ; HRMS (ESI-TOF) Calc'd for  $\text{C}_{11}\text{H}_{14}\text{F}_2\text{NO}$   $[\text{M}+\text{H}]^+$ : 214.1038; found 214.1041.

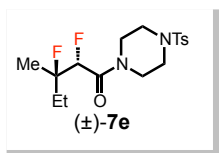

**(±)-7e:** Prepared according to general procedure E using (*Z*)-3-methyl-1-(4-tosylpiperazin-1-yl)pent-2-en-1-one (**6e**, 200 mg, 0.594 mmol). After work-up, the crude residue was purified by flash column chromatography on silica gel (0 to 25% ethyl acetate in hexanes) to give (±)-7e (165 mg, 74%) as a white solid. The diastereomeric ratio of the product was determined to be >19:1 by  $^1\text{H}$  and  $^{19}\text{F}$  NMR analysis.  $^1\text{H}$  NMR (500 MHz,  $\text{CDCl}_3$ )  $\delta$  7.63 (d,  $J = 8.3$  Hz, 2H), 7.34 (d,  $J = 8.3$  Hz, 2H), 4.91 (dd,  $J = 48.4, 25.9$  Hz, 1H), 3.82–3.65 (m, 4H), 3.09–2.94 (m, 4H), 2.44 (s, 3H), 1.83 (quindd,  $J = 7.8, 15.7, 2.0$  Hz, 1H), 1.64 (quind,  $J = 7.3, 15.2$  Hz, 1H), 1.35 (dd,  $J = 22.0, 1.0$  Hz, 3H), 0.96 (t,  $J = 7.6$  Hz, 3H);  $^{13}\text{C}$  NMR (125.7 MHz,  $\text{CDCl}_3$ )  $\delta$  164.6 (d,  $J = 18.2$  Hz), 144.1, 132.5, 130.0, 127.8, 97.0 (dd,  $J = 175.5, 19.2$  Hz), 94.7 (dd,  $J = 197.5, 24.0$  Hz), 46.5, 46.0, 45.3, 42.3, 28.6 (dd,  $J = 24.0, 6.7$  Hz), 21.6, 19.9 (dd,  $J = 24.0, 3.8$  Hz), 7.7 (d,  $J = 7.7$  Hz);  $^{19}\text{F}$  NMR (470.4 MHz,  $\text{CDCl}_3$ )  $\delta$  -154.6–-155.0 (m, 1F), -190.7 (dd,  $J = 48.1, 14.9$  Hz, 1F); FTIR (thin film)  $\nu$  2973 (w), 2921 (w), 1651 (s), 1446 (m), 1349 (m), 1165 (s), 1055 (m), 725 (m)  $\text{cm}^{-1}$ ; HRMS (ESI-TOF) Calc'd for  $\text{C}_{17}\text{H}_{25}\text{F}_2\text{N}_2\text{O}_3\text{S}$   $[\text{M}+\text{H}]^+$ : 375.1548; found 375.1561.

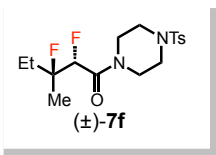

**(±)-7f:** Prepared according to general procedure E using (*E*)-3-methyl-1-(4-tosylpiperazin-1-yl)pent-2-en-1-one (**6f**, 200 mg, 0.594 mmol). After work-up, the crude residue was purified by flash column chromatography on silica gel (0 to 10% ethyl acetate in dichloromethane) to give (±)-**7f** (146 mg, 66%) as a white solid. The diastereomeric ratio of the product was determined to be >19:1 by <sup>1</sup>H and <sup>19</sup>F NMR analysis. The connectivity and relative stereochemistry of (±)-**7f** were secured by X-ray diffraction analysis of a single crystal (page S87, vide infra).<sup>35</sup> <sup>1</sup>H NMR (500 MHz, CDCl<sub>3</sub>) δ 7.58 (d, *J* = 8.3 Hz, 2H), 7.30 (d, *J* = 8.3 Hz, 2H), 4.93 (dd, *J* = 47.8, 20.0 Hz, 1H), 3.78–3.57 (m, 4H), 3.07–2.90 (m, 4H), 2.39 (s, 3H), 1.73 (quind, *J* = 7.5, 15.1 Hz, 1H), 1.64 (quind, *J* = 7.3, 14.6 Hz, 1H), 1.35 (d, *J* = 22.5 Hz, 3H), 0.92 (t, *J* = 7.3 Hz, 3H); <sup>13</sup>C NMR (125.7 MHz, CDCl<sub>3</sub>) δ 164.6 (d, *J* = 22.0 Hz), 144.1, 132.5, 129.9, 127.8, 96.9 (dd, *J* = 174.5, 20.1 Hz), 93.1 (dd, *J* = 193.7, 26.9 Hz), 46.4, 45.9, 45.3, 42.1, 29.3 (dd, *J* = 23.0, 2.9 Hz), 21.6, 19.3 (dd, *J* = 24.9, 6.7 Hz), 7.5 (d, *J* = 6.7 Hz); <sup>19</sup>F NMR (470.4 MHz, CDCl<sub>3</sub>) δ -156.3–-156.7 (m, 1F), -191.3 (dd, *J* = 48.1, 13.3 Hz, 1F); FTIR (thin film) ν 2984 (w), 2924 (w), 1665 (s), 1448 (m), 1349 (m), 1166 (s), 725 (m) cm<sup>-1</sup>; HRMS (ESI-TOF) Calc'd for C<sub>17</sub>H<sub>25</sub>F<sub>2</sub>N<sub>2</sub>O<sub>3</sub>S [M+H]<sup>+</sup>: 375.1548; found 375.1564.

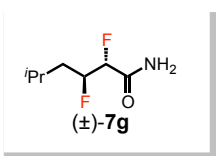

**(±)-7g:** Prepared according to general procedure F using (*E*)-5-methylhex-2-enamide<sup>36</sup> (**6g**, 300 mg, 2.36 mmol). After work-up, the crude residue was purified by flash column chromatography on silica gel (0 to 20% ethyl acetate in dichloromethane) to give (±)-**7g** (350 mg, 90%) as a white solid. The diastereomeric ratio of the product was determined to be >19:1 by <sup>1</sup>H and <sup>19</sup>F NMR analysis. The connectivity and relative stereochemistry of (±)-**7g** were secured by X-ray diffraction analysis of a single crystal (page S93, vide infra).<sup>37</sup> <sup>1</sup>H NMR (500 MHz, CDCl<sub>3</sub>) δ 6.62–6.45 (br-s, 1H), 6.45–6.28 (br-s, 1H), 5.06 (dd, *J* = 49.8, 19.1 Hz, 1H), 4.98 (ddd, *J* = 47.4, 24.9, 10.3 Hz, 1H), 1.94–1.76 (m, 2H), 1.28 (dddd, *J* = 40.1, 14.2, 8.8, 2.9 Hz, 1H), 0.96 (d, *J* = 6.4 Hz, 3H), 0.93 (d, *J* = 6.4 Hz, 3H); <sup>13</sup>C NMR (125.7 MHz, CDCl<sub>3</sub>) δ 169.3 (dd, *J* = 21.1, 10.5 Hz), 92.3 (dd, *J* = 193.7, 23.0 Hz), 91.2 (dd, *J* = 176.4, 19.2 Hz), 37.2 (dd, *J* = 21.1, 4.8 Hz), 24.5 (d, *J* = 1.9 Hz), 23.3, 21.7; <sup>19</sup>F NMR (470.4 MHz, CDCl<sub>3</sub>) δ -193.1–-193.4 (m, 1F), -198.1 (dddd, *J* = 49.8, 24.9, 13.3, 3.3 Hz, 1F); FTIR (thin film) ν 3389 (br-m), 3180 (br-m), 2959 (w), 2901 (w), 1669 (s), 1405 (m), 1393 (m), 1107 (m), 1058 (s) cm<sup>-1</sup>; HRMS (ESI-TOF) Calc'd for C<sub>11</sub>H<sub>14</sub>F<sub>2</sub>NO [M+H]<sup>+</sup>: 166.1038; found 166.1035.

**Reaction using 1a:** The above procedure was repeated using *p*-iodotoluene as a catalyst (102 mg, 0.47 mmol, 20.0 mol %) to give (±)-**7g** (235 mg, 60%) as a white solid.

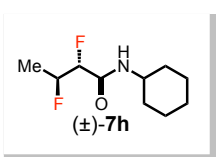

**(±)-7h:** Prepared according to general procedure F using (*E*)-*N*-cyclohexylbut-2-enamide<sup>38</sup> (**6h**, 300 mg, 1.79 mmol). After work-up, the crude residue was purified by flash column chromatography on silica gel (0 to 10% ethyl acetate in hexanes) to give (±)-**7h** (314 mg, 85%) as a white solid. The diastereomeric ratio of the product was determined to be >19:1 by <sup>1</sup>H and <sup>19</sup>F NMR analysis. <sup>1</sup>H NMR (500 MHz, CDCl<sub>3</sub>) δ 6.31–6.09 (br-s, 1H), 5.11 (qdd, *J* = 6.8, 46.0, 25.9 Hz, 1H), 5.07 (dd, *J* = 48.8, 16.6 Hz, 1H), 3.85–3.74 (m, 1H), 1.97–1.85 (m, 2H), 1.79–1.68 (m, 2H), 1.67–1.59 (m, 1H), 1.44–1.32 (m, 2H), 1.37 (dd, *J* = 23.5, 6.8 Hz, 3H), 1.27–1.13 (m, 3H); <sup>13</sup>C NMR (125.7 MHz, CDCl<sub>3</sub>) δ 165.1 (dd, *J* = 19.2, 10.6 Hz), 92.2 (dd, *J* = 194.7, 22.1 Hz), 89.2 (dd, *J* = 174.5, 20.8 Hz), 48.1, 33.1, 32.8, 25.5, 24.9, 24.8, 14.0 (dd, *J* = 23.0, 6.7 Hz); <sup>19</sup>F NMR (470.4 MHz, CDCl<sub>3</sub>) δ -185.2–-185.7 (m, 1F), -203.1 (ddd, *J* = 48.8, 25.9, 10.7 Hz, 1F); FTIR (thin film) ν 3310 (br-m), 2935 (w), 2854 (w), 1647 (s), 1553 (m), 1450 (m), 1099 (m), 1083 (m), 992 (m) cm<sup>-1</sup>; HRMS (ESI-TOF) Calc'd for C<sub>10</sub>H<sub>18</sub>F<sub>2</sub>NO [M+H]<sup>+</sup>: 206.1351; found 206.1357.

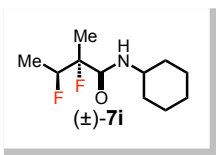

**(±)-7i:** Prepared according to general procedure F using (*E*)-*N*-cyclohexyl-2-methylbut-2-enamide (**6i**, 100 mg, 0.552 mmol). After work-up, the crude residue was purified by flash column chromatography on silica gel (0 to 50% dichloromethane in hexanes) to give (±)-**7i** (102 mg, 84%) as a white solid. The diastereomeric ratio of the product was determined to be >19:1 by <sup>1</sup>H and <sup>19</sup>F NMR analysis. <sup>1</sup>H NMR (500 MHz, CDCl<sub>3</sub>) δ 6.40–6.19 (br-s, 1H), 4.85 (qdd, *J* = 6.4, 47.0, 23.5 Hz, 1H), 3.80–3.68 (m, 1H), 1.94–1.84 (m, 2H), 1.77–1.66 (m, 2H), 1.65–1.58 (m, 1H), 1.59 (d, *J* = 23.0 Hz, 3H), 1.41–1.28 (m, 2H), 1.32 (dd, *J* = 24.0, 6.4 Hz, 3H), 1.25–1.11 (m, 3H); <sup>13</sup>C NMR (125.7 MHz, CDCl<sub>3</sub>) δ 168.8 (dd, *J* = 20.0, 6.7 Hz), 98.1 (dd, *J* = 191.7, 20.0 Hz), 91.3 (dd, *J* = 178.3, 21.0 Hz), 48.2, 33.1, 32.9, 25.6, 24.9, 24.9, 20.1 (dd, *J* = 23.8, 5.7 Hz), 14.9 (dd, *J* = 23.8, 6.7 Hz); <sup>19</sup>F NMR (470.4 MHz, CDCl<sub>3</sub>) δ -170.0–-191.4 (m, 1F), -191.4 (qdd, *J* = 23.0, 47.0, 11.6 Hz, 1F); FTIR (thin film) ν 3322 (br-m), 2929 (w), 2856 (w), 1649 (s), 1540 (s), 1448 (m), 1110 (m), 1090 (m), 1065 (m) cm<sup>-1</sup>; HRMS (ESI-TOF) Calc'd for C<sub>11</sub>H<sub>20</sub>F<sub>2</sub>NO [M+H]<sup>+</sup>: 220.1507; found 220.1515.

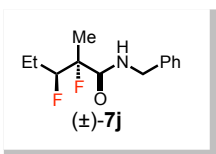

**(±)-7j:** Prepared according to general procedure F using (*E*)-*N*-benzyl-2-methylpent-2-enamide (**6j**, 112 mg, 0.551 mmol). After work-up, the crude residue was purified by flash column chromatography on silica gel (0 to 10% ethyl acetate in hexanes) to give (±)-**7j** (106 mg, 80%) as a white solid. The diastereomeric ratio of the product was determined to be >19:1 by <sup>1</sup>H and <sup>19</sup>F NMR analysis. <sup>1</sup>H NMR (500 MHz, CDCl<sub>3</sub>) δ 7.38–7.25 (m, 5H), 6.81–6.68 (br-s, 1H), 4.63 (dddd, *J* = 47.4, 23.5, 10.8, 2.5 Hz, 1H), 4.51–4.42 (m, 2H), 1.91–1.78 (m, 1H), 1.65 (dd, *J* = 23.0, 2.0 Hz, 3H), 1.51 (sextdd, *J* = 7.4, 39.7, 2.5 Hz, 1H), 1.04 (t, *J* = 7.6 Hz, 1H); <sup>13</sup>C NMR (125.7 MHz, CDCl<sub>3</sub>) δ 169.9 (dd, *J* = 20.1, 6.7 Hz), 137.6, 129.0, 128.0, 127.9, 98.3 (dd, *J* = 191.8, 20.1 Hz), 96.1 (dd, *J* = 181.2, 20.1 Hz), 43.4, 22.6 (dd, *J* = 22.1, 4.8 Hz), 20.5 (dd, *J* = 24.0, 5.8 Hz), 10.1 (d, *J* = 3.8 Hz); <sup>19</sup>F NMR (376.3 MHz, CDCl<sub>3</sub>) δ -167.9–-168.3 (m, 1F), -201.2 (tdd, *J* = 47.4, 39.7, 13.0 Hz, 1F); FTIR (thin film) ν 3325 (br-m), 2974 (w), 2936 (w), 1662 (s), 1531 (m), 1454 (m), 1078 (m), 966 (m) cm<sup>-1</sup>; HRMS (ESI-TOF) Calc'd for C<sub>13</sub>H<sub>18</sub>F<sub>2</sub>NO [M+H]<sup>+</sup>: 242.1351; found 242.1358.

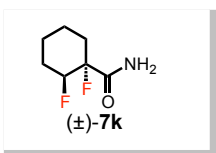

**(±)-7k:** Prepared according to general procedure F using cyclohex-1-enecarboxamide<sup>39</sup> (**6k**, 200 mg, 1.60 mmol). After work-up, the crude residue was purified by flash column chromatography on silica gel (0 to 10% ethyl acetate in dichloromethane) to give (±)-**7k** (156 mg, 60%) as a light yellow solid. The diastereomeric ratio of the product was determined to be >19:1 by <sup>1</sup>H and <sup>19</sup>F NMR analysis. The connectivity and relative stereochemistry of (±)-**7k** were secured by X-ray diffraction analysis of a single crystal (page S97, vide infra).<sup>40</sup> <sup>1</sup>H NMR (500 MHz, CDCl<sub>3</sub>) δ 6.53–6.22 (br-s, 1H), 6.21–5.84 (br-s, 1H), 4.62 (dddd, *J* = 49.4, 13.7, 9.8, 4.9 Hz, 1H), 2.29–2.10 (m, 2H), 2.07–1.95 (m, 1H), 1.95–1.74 (m, 2H), 1.74–1.58 (m, 2H), 1.42–1.31 (m, 1H); <sup>13</sup>C NMR (125.7 MHz, CDCl<sub>3</sub>) δ 172.0 (d, *J* = 23.8 Hz), 95.8 (dd, *J* = 187.9, 21.9 Hz), 93.1 (dd, *J* = 182.2, 24.8 Hz), 32.6 (d, *J* = 19.1 Hz), 28.5 (dd, *J* = 18.1, 5.7 Hz), 21.9 (d, *J* = 8.6 Hz), 21.7 (d, *J* = 7.6 Hz); <sup>19</sup>F NMR (470.4 MHz, CDCl<sub>3</sub>) δ -150.5–-152.8 (m, 1F), -187.7 (d, *J* = 49.4 Hz, 1F); FTIR (thin film) ν 3417 (br-m), 3193 (br-m), 2943 (w), 1681 (s), 1451 (m), 1408 (m), 1070 (m), 1038 (s) cm<sup>-1</sup>; HRMS (ESI-TOF) Calc'd for C<sub>7</sub>H<sub>11</sub>F<sub>2</sub>NO [M+H]<sup>+</sup>: 164.0881; found 164.0878.



## Enantioselective Difluorination of **6c**:

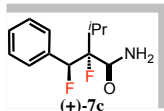

**(+)-7c**: (*E*)-2-benzylidene-3-methylbutanamide (**6c**, 197 mg, 1.04 mmol, 1 equiv), catalyst **1d** (128 mg, 0.21 mmol, 20 mol%) and *m*CPBA (307 mg, 1.35 mmol, 1.30 equiv) were dissolved in dichloromethane (2.0 mL). The reaction mixture was cooled to  $-78^{\circ}\text{C}$ , and pyr•9HF (2.72 mL, 104.0 mmol, 100 equiv HF) was added. The reaction vessel was transferred to a  $4^{\circ}\text{C}$  refrigerator and stirred for 72 hours. After 72 hours, the reaction mixture was cooled to  $-78^{\circ}\text{C}$ , and was slowly added to a stirred slurry of silica gel (20 grams) and ethyl acetate (100 mL). The mixture was allowed to warm to room temperature with stirring, and was then filtered and the silica gel washed with 150 mL ethyl acetate. To the combined filtrate was added 100 mL saturated aqueous  $\text{NaHCO}_3$ , and the organic layer was separated. The resulting solution was dried with anhydrous  $\text{MgSO}_4$  and concentrated. The resulting residue was purified by flash column chromatography on silica gel (0 to 10% diethyl ether in dichloromethane) to give (+)-**7c** (121 mg, 51%) as a white solid. These solvent conditions for purification enabled greater separation between the product and the catalyst. (+)-**7c** was determined to be of 93% e.e. by chiral GC analysis ( $\beta$ -Cyclosil,  $120 \rightarrow 200^{\circ}\text{C}$ ,  $1^{\circ}/\text{min}$ , 7 psi,  $t_r(\text{major}) = 48.153$  min,  $t_r(\text{minor}) = 48.655$  min) and  $>19:1$  d.r. by  $\text{F}^{19}$  NMR. The spectral data for (+)-**7c** were in accordance with ( $\pm$ )-**7c** (*vide supra*).  $[\alpha]_D^{23} = +6.2$  ( $c = 1.0$ ,  $\text{CHCl}_3$ ). The absolute stereochemistry of (+)-**7c** was confirmed by X-ray diffraction analysis of a single crystal.<sup>41</sup>

### Chiral GC Trace of (+)-**7c**

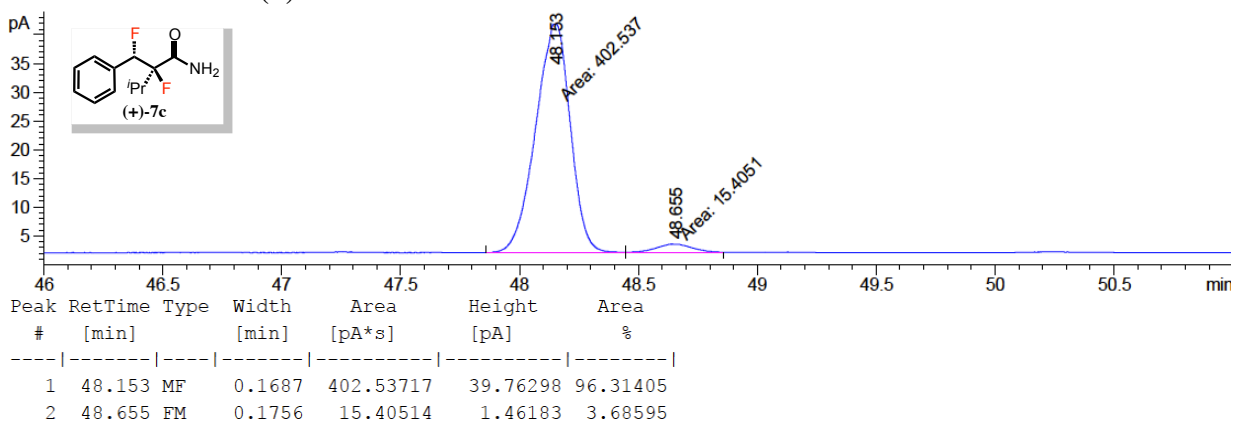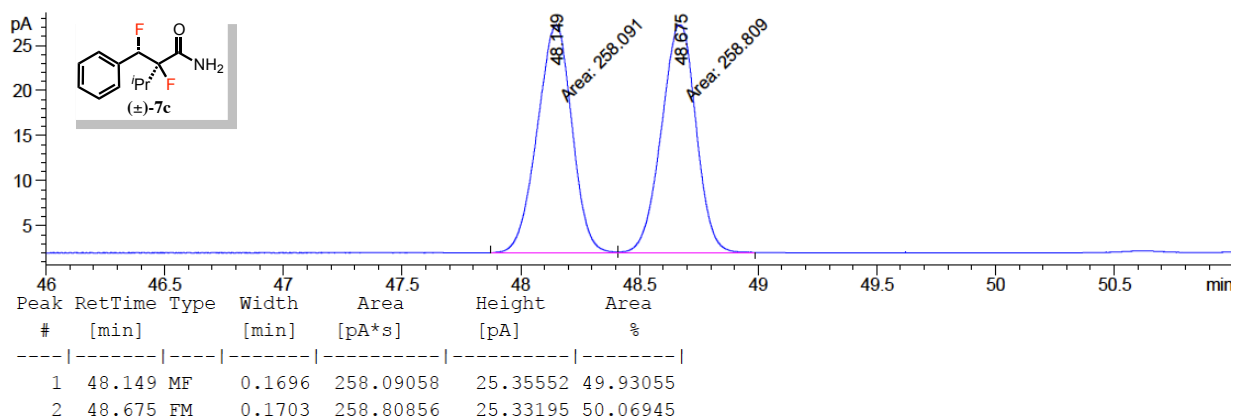

**Computational Details:** Calculations were executed using the Gaussian 09<sup>42</sup> program at the M06-2X level of theory. The SDD basis set was used for iodine and the 6-31+G(d) basis set for all other atoms. Default optimization convergence criteria, tight SCF convergence criteria, and default integration settings were used. Optimized structures correspond to gas-phase (298 K) structures unless noted. Solvation energies were evaluated by a self-consistent reaction field (SCRF) using the CPCM model with UFF radii. Stationary points were characterized by the presence of all positive eigenvalues of the Hessian for minima. All molecular structures were rendered in CYLView.<sup>43</sup>

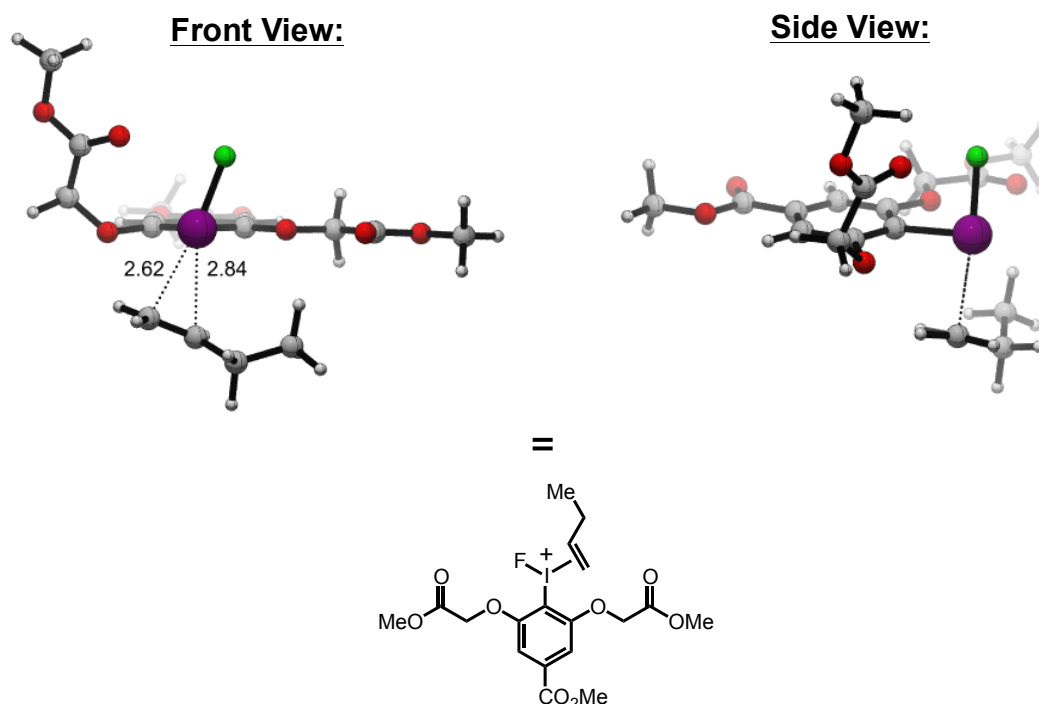

**Figure S1:** Computed binding mode of butene to aryl iodonium derived from catalyst **1b**. Structures calculated at the M06-2X/6-31+G(d,p)[SDD, for I] level of theory in DCM.

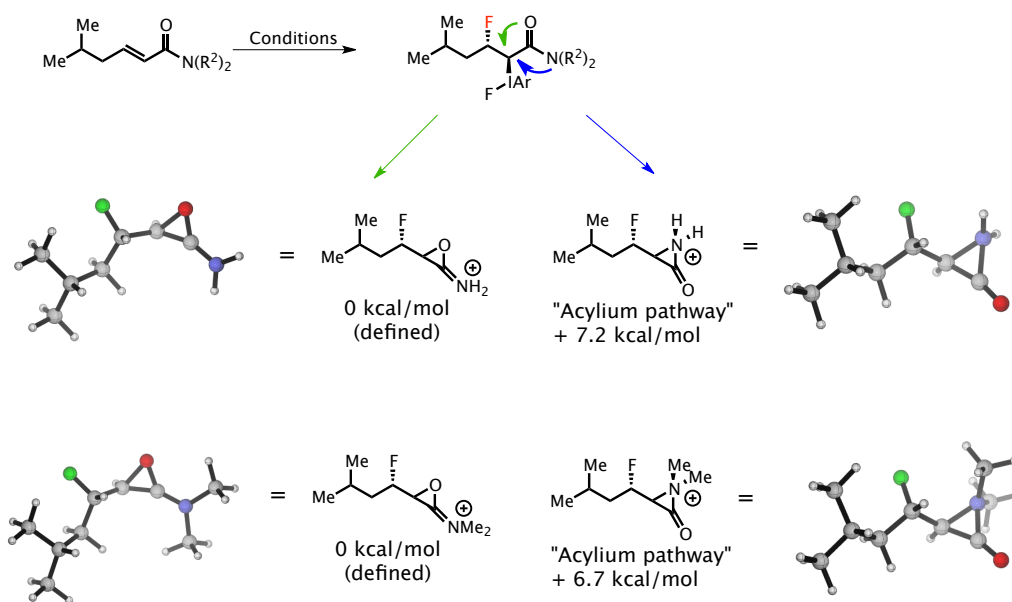

**Figure S2:** Computed models of anchimeric assistance in acrylamide difluorination. Structures calculated at the M06-2X/6-31+G(d,p) level of theory.



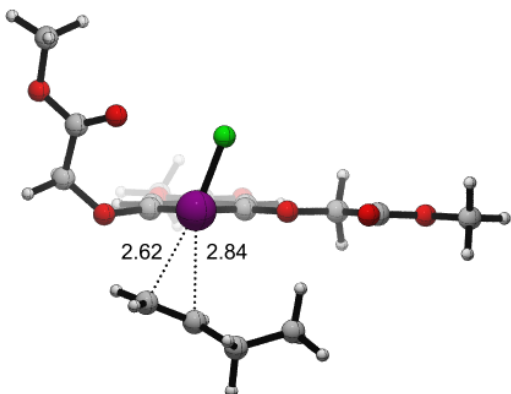

Charge = 1 Multiplicity = 1  
 Electronic Energy (AU) = -1411.96511794  
 Solvent: DCM

Imaginary Frequencies: 0

|   |          |          |          |
|---|----------|----------|----------|
| C | 1.6077   | 2.36772  | 0.41763  |
| C | 2.31368  | 1.21358  | 0.74854  |
| C | 1.66039  | -0.01742 | 0.70146  |
| C | 0.31728  | -0.04216 | 0.32898  |
| C | -0.4065  | 1.12151  | 0.02667  |
| C | 0.25912  | 2.34315  | 0.06316  |
| H | 3.34973  | 1.28171  | 1.05867  |
| H | -0.23613 | 3.27845  | -0.17308 |
| I | -0.67734 | -1.85296 | 0.01624  |
| O | -1.6987  | 0.94069  | -0.27988 |
| O | 2.25357  | -1.18397 | 1.0763   |
| C | 3.48397  | -1.51332 | 0.44998  |
| H | 3.91707  | -2.33615 | 1.02209  |
| C | -2.44896 | 2.01566  | -0.80793 |
| H | -1.97561 | 2.42052  | -1.70969 |
| C | 3.22287  | -1.96279 | -0.98028 |
| C | -3.81517 | 1.44844  | -1.15744 |
| O | 2.11727  | -2.04251 | -1.46095 |
| O | -4.16162 | 0.31609  | -0.93846 |
| O | 4.35563  | -2.25023 | -1.59879 |
| O | -4.55525 | 2.39132  | -1.72595 |
| C | 4.23331  | -2.70354 | -2.96087 |
| H | 3.7578   | -1.92962 | -3.56488 |
| H | 5.25039  | -2.89185 | -3.29524 |
| H | 3.63531  | -3.61522 | -2.99352 |
| C | -5.8817  | 1.99663  | -2.11864 |
| H | -6.44313 | 1.6621   | -1.24495 |
| H | -6.33134 | 2.88592  | -2.55336 |
| H | -5.82443 | 1.18975  | -2.85076 |
| C | -0.31901 | -2.39552 | 2.64758  |
| H | -0.56571 | -3.45616 | 2.63178  |
| H | 0.73314  | -2.12498 | 2.67525  |
| C | -1.29549 | -1.46488 | 2.82453  |
| H | -0.99384 | -0.41712 | 2.90266  |

|   |          |          |          |
|---|----------|----------|----------|
| F | -0.69276 | -1.51257 | -1.89688 |
| C | -2.75487 | -1.74388 | 2.97903  |
| H | -2.95547 | -1.70627 | 4.05985  |
| H | -2.97961 | -2.76873 | 2.66214  |
| C | -3.64735 | -0.72194 | 2.26796  |
| H | -4.69754 | -0.92064 | 2.48998  |
| H | -3.41932 | 0.29243  | 2.61192  |
| H | -3.52398 | -0.74529 | 1.18167  |
| H | 4.19287  | -0.68017 | 0.4579   |
| H | -2.56817 | 2.81936  | -0.07164 |
| C | 2.26606  | 3.7205   | 0.44628  |
| O | 1.67224  | 4.74077  | 0.19739  |
| O | 3.55503  | 3.65167  | 0.76973  |
| C | 4.24612  | 4.91239  | 0.81145  |
| H | 5.27372  | 4.67254  | 1.07379  |
| H | 4.19331  | 5.39478  | -0.1658  |
| H | 3.79046  | 5.55931  | 1.56272  |

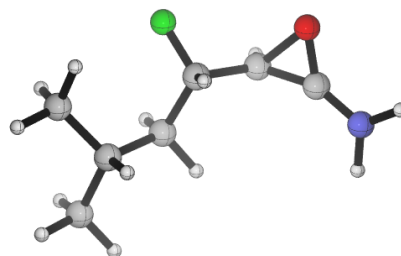

Charge = 1 Multiplicity = 1  
 Electronic Energy (AU) = -503.88462292  
 Solvent: gas phase

Imaginary Frequencies: 0

|   |          |          |          |
|---|----------|----------|----------|
| C | -2.01362 | 2.94639  | -0.34804 |
| H | -1.22747 | 3.51366  | -0.80105 |
| C | -3.34327 | 3.24544  | -1.06675 |
| H | -3.56417 | 4.28991  | -0.98809 |
| H | -3.26074 | 2.97587  | -2.09891 |
| H | -4.12928 | 2.67853  | -0.61223 |
| C | -2.13618 | 3.33448  | 1.13751  |
| H | -2.92391 | 2.76852  | 1.58955  |
| H | -1.21415 | 3.1258   | 1.63838  |
| H | -2.35628 | 4.37881  | 1.21661  |
| C | -1.69418 | 1.44355  | -0.46208 |
| H | -0.77189 | 1.23536  | 0.03867  |
| H | -2.48056 | 0.87606  | -0.01061 |
| C | -1.57003 | 1.0571   | -1.94684 |
| C | -1.25073 | -0.44456 | -2.0633  |
| H | -2.22112 | -0.58591 | -1.63532 |

|   |          |          |          |
|---|----------|----------|----------|
| C | -1.43161 | -1.43733 | -3.15792 |
| O | -0.77957 | -0.25261 | -3.54661 |
| N | -1.89762 | -2.59081 | -3.51582 |
| H | -2.35032 | -3.17717 | -2.84327 |
| H | -1.80478 | -2.8957  | -4.46361 |
| H | -0.7833  | 1.62478  | -2.39817 |
| F | -2.73341 | 1.31959  | -2.5794  |

---

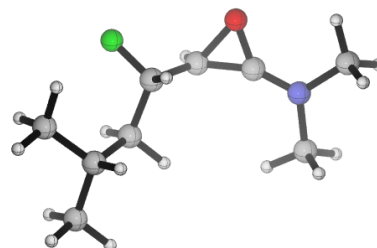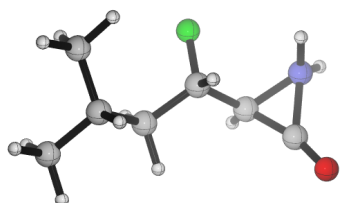

Charge = 1 Multiplicity = 1  
 Electronic Energy (AU)= -503.87321814  
 Solvent: gas phase  
 Imaginary Frequencies: 0

|   |          |          |          |
|---|----------|----------|----------|
| C | -2.3401  | -0.10937 | 0.18469  |
| H | -2.23349 | -0.37515 | 1.21566  |
| C | -2.64385 | 1.39612  | 0.07145  |
| H | -3.55199 | 1.61693  | 0.59245  |
| H | -1.84016 | 1.95556  | 0.50273  |
| H | -2.75046 | 1.6619   | -0.95952 |
| C | -3.49681 | -0.91455 | -0.43604 |
| H | -3.60342 | -0.64877 | -1.467   |
| H | -3.28576 | -1.96057 | -0.35735 |
| H | -4.40495 | -0.69374 | 0.08496  |
| C | -1.03307 | -0.42716 | -0.56516 |
| H | -0.82201 | -1.47319 | -0.48648 |
| H | -1.13967 | -0.16138 | -1.59613 |
| C | 0.12365  | 0.37801  | 0.05557  |
| C | 1.43068  | 0.06022  | -0.69428 |
| H | 1.47006  | 1.10041  | -0.94197 |
| C | 2.86886  | 0.02561  | -0.25448 |
| O | 4.05092  | 0.39171  | -0.4831  |
| N | 1.98818  | -0.76949 | 0.55368  |
| H | 1.43191  | -1.58193 | 0.37907  |
| H | 2.71305  | -1.44878 | 0.66828  |
| F | -0.14263 | 1.69776  | -0.04371 |
| H | 0.23026  | 0.11223  | 1.08654  |

---

Charge = 1 Multiplicity = 1  
 Electronic Energy (AU)= -582.24461113  
 Solvent: gas phase  
 Imaginary Frequencies: 0

|   |          |          |          |
|---|----------|----------|----------|
| C | -2.01362 | 2.94639  | -0.34804 |
| H | -1.22747 | 3.51366  | -0.80105 |
| C | -3.34327 | 3.24544  | -1.06675 |
| H | -3.56417 | 4.28991  | -0.98809 |
| H | -3.26074 | 2.97587  | -2.09891 |
| H | -4.12928 | 2.67853  | -0.61223 |
| C | -2.13618 | 3.33448  | 1.13751  |
| H | -2.92391 | 2.76852  | 1.58955  |
| H | -1.21415 | 3.1258   | 1.63838  |
| H | -2.35628 | 4.37881  | 1.21661  |
| C | -1.69418 | 1.44355  | -0.46208 |
| H | -0.77189 | 1.23536  | 0.03867  |
| H | -2.48056 | 0.87606  | -0.01061 |
| C | -1.57003 | 1.0571   | -1.94684 |
| C | -1.25073 | -0.44456 | -2.0633  |
| H | -2.22112 | -0.58591 | -1.63532 |
| C | -1.43161 | -1.43733 | -3.15792 |
| O | -0.77957 | -0.25261 | -3.54661 |
| N | -1.89762 | -2.59081 | -3.51582 |
| C | -2.56273 | -3.4523  | -2.5277  |
| H | -3.48998 | -3.00702 | -2.23303 |
| H | -2.74994 | -4.41279 | -2.9605  |
| H | -1.93241 | -3.56415 | -1.67034 |
| C | -1.76114 | -3.03902 | -4.90915 |
| H | -2.30615 | -2.37895 | -5.55116 |
| H | -0.72761 | -3.03318 | -5.18609 |
| H | -2.15031 | -4.03117 | -5.00441 |
| H | -0.7833  | 1.62478  | -2.39817 |
| F | -2.73341 | 1.31959  | -2.5794  |

---

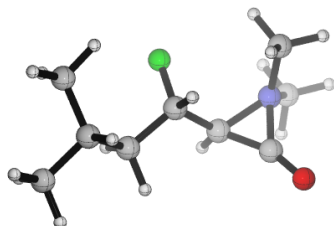

Charge = 1 Multiplicity = 1  
Electronic Energy (AU)= -582.47199709

Solvent: gas phase

Imaginary Frequencies: 0

|   |          |          |          |
|---|----------|----------|----------|
| C | -2.07662 | 3.00296  | -0.53448 |
| H | -1.73455 | 3.54546  | -1.39098 |
| C | -3.61629 | 3.01002  | -0.50365 |
| H | -3.96734 | 4.01937  | -0.4501  |
| H | -3.99295 | 2.54806  | -1.39226 |
| H | -3.95837 | 2.46752  | 0.35285  |
| C | -1.53452 | 3.66784  | 0.74445  |
| H | -1.87659 | 3.12534  | 1.60094  |
| H | -0.46474 | 3.66294  | 0.72303  |
| H | -1.88557 | 4.67719  | 0.79799  |
| C | -1.57137 | 1.55025  | -0.61154 |
| H | -0.5016  | 1.54535  | -0.63297 |
| H | -1.91345 | 1.00775  | 0.24495  |
| C | -2.11347 | 0.88537  | -1.89047 |
| C | -1.60823 | -0.56734 | -1.96753 |
| H | -2.63675 | -0.86178 | -1.94877 |
| C | -1.28568 | -1.4681  | -3.12839 |
| O | -1.44316 | -2.59589 | -3.66397 |
| N | -0.6175  | -0.19808 | -3.167   |
| C | -1.30085 | 0.26257  | -4.38427 |
| H | -0.99012 | 1.26089  | -4.61163 |
| H | -1.05069 | -0.38331 | -5.19984 |
| H | -2.35914 | 0.24543  | -4.22737 |
| C | 0.79218  | -0.54683 | -2.9388  |
| H | 1.15191  | -1.13267 | -3.75873 |
| H | 1.37259  | 0.34847  | -2.85841 |
| H | 0.87814  | -1.11014 | -2.03316 |
| F | -3.46319 | 0.89155  | -1.86344 |
| H | -1.7714  | 1.42787  | -2.74697 |

## X-Ray Crystallographic Data

### X-Ray Crystal Structure of 1,2-Difluoride 3j.

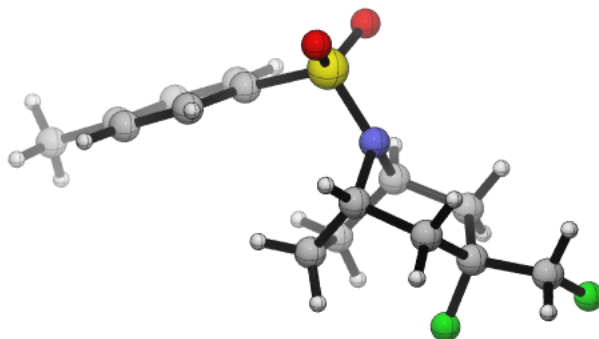

A crystal mounted on a diffractometer was collected data at 100 K. The intensities of the reflections were collected by means of a Bruker APEX II CCD diffractometer ( $\text{MoK}_\alpha$  radiation,  $\lambda=0.71073 \text{ \AA}$ ), and equipped with an Oxford Cryosystems nitrogen flow apparatus. The collection method involved  $0.5^\circ$  scans in  $\omega$  at  $28^\circ$  in  $2\theta$ . Data integration down to  $0.78 \text{ \AA}$  resolution was carried out using SAINT V8.34 C<sup>44</sup> with reflection spot size optimization. Absorption corrections were made with the program SADABS.<sup>44</sup> The structure was solved by the Intrinsic Phasing methods and refined by least-squares methods again  $F^2$  using SHELXT-2014<sup>45</sup> and SHELXL-2014<sup>46</sup> with OLEX 2 interface.<sup>47</sup> Non-hydrogen atoms were refined anisotropically, and hydrogen atoms were allowed to ride on the respective atoms. The Ortep plots produced with SHELXL-2014 program, and the other drawings were produced with Accelrys DS Visualizer 2.0.<sup>48</sup>

**Table S4. Experimental details**

|                                      |                                                           |
|--------------------------------------|-----------------------------------------------------------|
|                                      | SMB-8-161                                                 |
| Crystal data                         |                                                           |
| Chemical formula                     | $\text{C}_{15}\text{H}_{19}\text{F}_2\text{NO}_2\text{S}$ |
| $M_r$                                | 315.37                                                    |
| Crystal system, space group          | Triclinic, $P-1$                                          |
| Temperature (K)                      | 100                                                       |
| $a, b, c$ ( $\text{\AA}$ )           | 6.134 (2), 10.761 (4), 12.298 (5)                         |
| $\alpha, \beta, \gamma$ ( $^\circ$ ) | 70.442 (6), 75.711 (7), 89.132 (7)                        |
| $V$ ( $\text{\AA}^3$ )               | 739.3 (5)                                                 |
| $Z$                                  | 2                                                         |
| Radiation type                       | Mo $K\alpha$                                              |
| $\mu$ ( $\text{mm}^{-1}$ )           | 0.25                                                      |
| Crystal size (mm)                    | $0.24 \times 0.16 \times 0.06$                            |

|                                                                       |                                                            |
|-----------------------------------------------------------------------|------------------------------------------------------------|
| Data collection                                                       |                                                            |
| Diffractometer                                                        | Bruker D8 goniometer with CCD area detector diffractometer |
| Absorption correction                                                 | Multi-scan TWINABS                                         |
| $T_{\min}, T_{\max}$                                                  | 0.663, 0.746                                               |
| No. of measured, independent and observed [ $I > 2s(I)$ ] reflections | 2529, 2529, 1445                                           |
| $R_{\text{int}}$                                                      | 0.0664                                                     |
| $(\sin \theta/\lambda)_{\text{max}}$ ( $\text{\AA}^{-1}$ )            | 0.597                                                      |
| Refinement                                                            |                                                            |
| $R[F^2 > 2s(F^2)], wR(F^2), S$                                        | 0.050, 0.099, 0.84                                         |
| No. of reflections                                                    | 2529                                                       |
| No. of parameters                                                     | 191                                                        |
| H-atom treatment                                                      | H-atom parameters constrained                              |
| $D\rho_{\text{max}}, D\rho_{\text{min}}$ ( $\text{e \AA}^{-3}$ )      | 0.36, -0.35                                                |

**Table S5. Geometric parameters ( $\text{\AA}$ ,  $^\circ$ )**

|        |           |          |           |
|--------|-----------|----------|-----------|
| C1—C2  | 1.383 (5) | C9—H9    | 1.0000    |
| C1—C6  | 1.384 (5) | C10—C11  | 1.554 (4) |
| C1—H1  | 0.9500    | C10—H10A | 0.9900    |
| C2—C3  | 1.389 (4) | C10—H10B | 0.9900    |
| C2—H2  | 0.9500    | C11—C12  | 1.542 (4) |
| C3—C4  | 1.385 (5) | C11—H11A | 0.9900    |
| C3—S1  | 1.753 (3) | C11—H11B | 0.9900    |
| C4—C5  | 1.389 (5) | C12—N1   | 1.493 (4) |
| C4—H4  | 0.9500    | C12—C13  | 1.520 (5) |
| C5—C6  | 1.393 (5) | C12—H12  | 1.0000    |
| C5—H5  | 0.9500    | C13—C14  | 1.519 (5) |
| C6—C7  | 1.504 (5) | C13—H13A | 0.9900    |
| C7—H7A | 0.9800    | C13—H13B | 0.9900    |
| C7—H7B | 0.9800    | C14—F1   | 1.432 (3) |
| C7—H7C | 0.9800    | C14—C15  | 1.491 (5) |
| C8—C9  | 1.514 (4) | C15—F2   | 1.402 (4) |
| C8—C14 | 1.525 (4) | C15—H15A | 0.9900    |
| C8—H8A | 0.9900    | C15—H15B | 0.9900    |

|              |           |               |             |
|--------------|-----------|---------------|-------------|
| C8—H8B       | 0.9900    | N1—S1         | 1.633 (3)   |
| C9—N1        | 1.476 (4) | O1—S1         | 1.437 (2)   |
| C9—C10       | 1.549 (4) | O2—S1         | 1.444 (2)   |
| C2—C1—C6     | 121.0 (3) | H10A—C10—H10B | 109.0       |
| C2—C1—H1     | 119.5     | C12—C11—C10   | 105.2 (2)   |
| C6—C1—H1     | 119.5     | C12—C11—H11A  | 110.7       |
| C1—C2—C3     | 119.9 (3) | C10—C11—H11A  | 110.7       |
| C1—C2—H2     | 120.1     | C12—C11—H11B  | 110.7       |
| C3—C2—H2     | 120.1     | C10—C11—H11B  | 110.7       |
| C4—C3—C2     | 120.2 (3) | H11A—C11—H11B | 108.8       |
| C4—C3—S1     | 120.0 (3) | N1—C12—C13    | 104.9 (3)   |
| C2—C3—S1     | 119.7 (3) | N1—C12—C11    | 103.3 (3)   |
| C3—C4—C5     | 119.0 (3) | C13—C12—C11   | 113.3 (3)   |
| C3—C4—H4     | 120.5     | N1—C12—H12    | 111.6       |
| C5—C4—H4     | 120.5     | C13—C12—H12   | 111.6       |
| C4—C5—C6     | 121.5 (3) | C11—C12—H12   | 111.6       |
| C4—C5—H5     | 119.2     | C14—C13—C12   | 113.7 (3)   |
| C6—C5—H5     | 119.2     | C14—C13—H13A  | 108.8       |
| C1—C6—C5     | 118.3 (3) | C12—C13—H13A  | 108.8       |
| C1—C6—C7     | 120.4 (4) | C14—C13—H13B  | 108.8       |
| C5—C6—C7     | 121.3 (4) | C12—C13—H13B  | 108.8       |
| C6—C7—H7A    | 109.5     | H13A—C13—H13B | 107.7       |
| C6—C7—H7B    | 109.5     | F1—C14—C15    | 105.5 (3)   |
| H7A—C7—H7B   | 109.5     | F1—C14—C13    | 107.7 (3)   |
| C6—C7—H7C    | 109.5     | C15—C14—C13   | 110.1 (3)   |
| H7A—C7—H7C   | 109.5     | F1—C14—C8     | 106.9 (2)   |
| H7B—C7—H7C   | 109.5     | C15—C14—C8    | 113.3 (3)   |
| C9—C8—C14    | 113.0 (3) | C13—C14—C8    | 112.8 (3)   |
| C9—C8—H8A    | 109.0     | F2—C15—C14    | 110.3 (3)   |
| C14—C8—H8A   | 109.0     | F2—C15—H15A   | 109.6       |
| C9—C8—H8B    | 109.0     | C14—C15—H15A  | 109.6       |
| C14—C8—H8B   | 109.0     | F2—C15—H15B   | 109.6       |
| H8A—C8—H8B   | 107.8     | C14—C15—H15B  | 109.6       |
| N1—C9—C8     | 105.5 (3) | H15A—C15—H15B | 108.1       |
| N1—C9—C10    | 104.3 (2) | C9—N1—C12     | 103.6 (2)   |
| C8—C9—C10    | 113.4 (3) | C9—N1—S1      | 120.0 (2)   |
| N1—C9—H9     | 111.1     | C12—N1—S1     | 121.6 (2)   |
| C8—C9—H9     | 111.1     | O1—S1—O2      | 119.81 (14) |
| C10—C9—H9    | 111.1     | O1—S1—N1      | 105.81 (14) |
| C9—C10—C11   | 104.0 (2) | O2—S1—N1      | 106.35 (14) |
| C9—C10—H10A  | 110.9     | O1—S1—C3      | 107.24 (15) |
| C11—C10—H10A | 110.9     | O2—S1—C3      | 108.30 (16) |
| C9—C10—H10B  | 110.9     | N1—S1—C3      | 108.97 (15) |

|                 |            |                |            |
|-----------------|------------|----------------|------------|
| C11—C10—H10B    | 110.9      |                |            |
| C6—C1—C2—C3     | 0.9 (5)    | C9—C8—C14—C13  | -38.6 (4)  |
| C1—C2—C3—C4     | -2.3 (5)   | F1—C14—C15—F2  | 63.3 (3)   |
| C1—C2—C3—S1     | 176.7 (3)  | C13—C14—C15—F2 | 179.2 (3)  |
| C2—C3—C4—C5     | 2.1 (5)    | C8—C14—C15—F2  | -53.3 (4)  |
| S1—C3—C4—C5     | -176.9 (3) | C8—C9—N1—C12   | -77.0 (3)  |
| C3—C4—C5—C6     | -0.6 (5)   | C10—C9—N1—C12  | 42.8 (3)   |
| C2—C1—C6—C5     | 0.5 (5)    | C8—C9—N1—S1    | 143.4 (2)  |
| C2—C1—C6—C7     | -179.1 (3) | C10—C9—N1—S1   | -96.9 (3)  |
| C4—C5—C6—C1     | -0.7 (5)   | C13—C12—N1—C9  | 76.0 (3)   |
| C4—C5—C6—C7     | 178.9 (3)  | C11—C12—N1—C9  | -42.9 (3)  |
| C14—C8—C9—N1    | 57.9 (3)   | C13—C12—N1—S1  | -145.2 (2) |
| C14—C8—C9—C10   | -55.7 (4)  | C11—C12—N1—S1  | 95.9 (3)   |
| N1—C9—C10—C11   | -25.3 (3)  | C9—N1—S1—O1    | -51.7 (3)  |
| C8—C9—C10—C11   | 88.9 (3)   | C12—N1—S1—O1   | 176.0 (2)  |
| C9—C10—C11—C12  | -0.8 (3)   | C9—N1—S1—O2    | 179.9 (2)  |
| C10—C11—C12—N1  | 26.2 (3)   | C12—N1—S1—O2   | 47.6 (3)   |
| C10—C11—C12—C13 | -86.8 (3)  | C9—N1—S1—C3    | 63.3 (3)   |
| N1—C12—C13—C14  | -56.6 (3)  | C12—N1—S1—C3   | -69.0 (3)  |
| C11—C12—C13—C14 | 55.4 (3)   | C4—C3—S1—O1    | -157.6 (3) |
| C12—C13—C14—F1  | -79.3 (3)  | C2—C3—S1—O1    | 23.4 (3)   |
| C12—C13—C14—C15 | 166.1 (3)  | C4—C3—S1—O2    | -27.0 (3)  |
| C12—C13—C14—C8  | 38.4 (4)   | C2—C3—S1—O2    | 154.1 (3)  |
| C9—C8—C14—F1    | 79.6 (3)   | C4—C3—S1—N1    | 88.3 (3)   |
| C9—C8—C14—C15   | -164.6 (3) | C2—C3—S1—N1    | -90.6 (3)  |

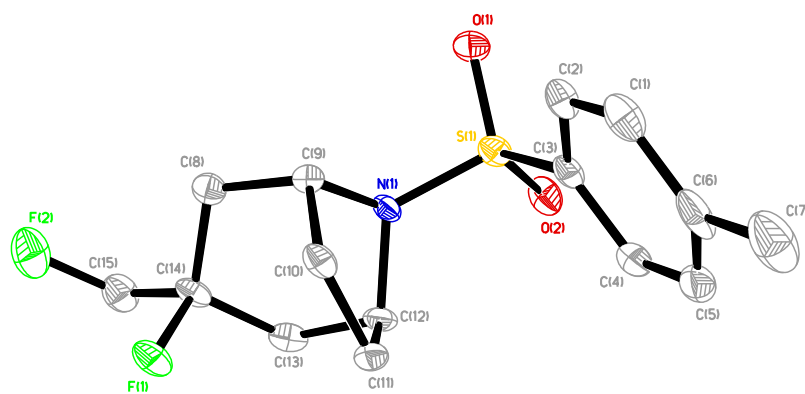

**Figure S3.** Perspective views showing 50% probability displacement.



### X-Ray Crystal Structure of 1,2-Difluoride ( $\pm$ )-S5i.

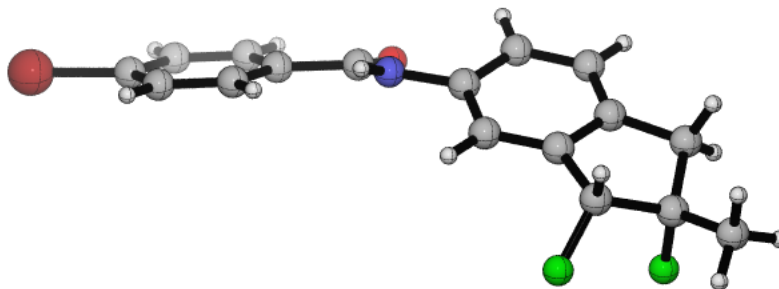

A crystal mounted on a diffractometer was collected data at 100 K. The intensities of the reflections were collected by means of a Bruker APEX II CCD diffractometer ( $\text{MoK}_\alpha$  radiation,  $\lambda=0.71073 \text{ \AA}$ ), and equipped with an Oxford Cryosystems nitrogen flow apparatus. The collection method involved  $0.5^\circ$  scans in  $\omega$  at  $28^\circ$  in  $2\theta$ . Data integration down to  $0.80 \text{ \AA}$  resolution was carried out using SAINT V8.34 C<sup>44</sup> with reflection spot size optimization. Absorption corrections were made with the program SADABS.<sup>44</sup> The structure was solved by the Intrinsic Phasing methods and refined by least-squares methods against  $F^2$  using SHELXT-2014<sup>45</sup> and SHELXL-2014<sup>46</sup> with OLEX 2 interface.<sup>47</sup> Non-hydrogen atoms were refined anisotropically, and hydrogen atoms were allowed to ride on the respective atoms. The Ortep plots produced with SHELXL-2014 program.<sup>48</sup>

**Table S6. Experimental details**

|                             |                                                   |
|-----------------------------|---------------------------------------------------|
|                             | SMB-p-Br-amide                                    |
| Crystal data                |                                                   |
| Chemical formula            | $\text{C}_{17}\text{H}_{14}\text{BrF}_2\text{NO}$ |
| $M_r$                       | 366.20                                            |
| Crystal system, space group | Monoclinic, $I2/c$                                |
| Temperature (K)             | 100                                               |
| $a, b, c$ ( $\text{\AA}$ )  | 9.9432 (7), 9.5857 (6), 94.148 (6)                |
| $b$ ( $^\circ$ )            | 91.086 (4)                                        |
| $V$ ( $\text{\AA}^3$ )      | 8971.9 (10)                                       |
| $Z$                         | 24                                                |
| Radiation type              | Mo $K\alpha$                                      |
| $m$ ( $\text{mm}^{-1}$ )    | 2.77                                              |
| Crystal size (mm)           | $0.16 \times 0.14 \times 0.04$                    |
|                             |                                                   |

|                                                                       |                                                            |
|-----------------------------------------------------------------------|------------------------------------------------------------|
| Data collection                                                       |                                                            |
| Diffractionmeter                                                      | Bruker D8 goniometer with CCD area detector diffractometer |
| Absorption correction                                                 | Multi-scan<br><i>SADABS</i>                                |
| $T_{\min}, T_{\max}$                                                  | 0.622, 0.746                                               |
| No. of measured, independent and observed [ $I > 2s(I)$ ] reflections | 59166, 10000, 7890                                         |
| $R_{\text{int}}$                                                      | 0.060                                                      |
| $(\sin \theta)_{\text{max}}$ ( $\text{\AA}^{-1}$ )                    | 0.644                                                      |
| Refinement                                                            |                                                            |
| $R[F^2 > 2s(F^2)], wR(F^2), S$                                        | 0.090, 0.196, 1.17                                         |
| No. of reflections                                                    | 10000                                                      |
| No. of parameters                                                     | 610                                                        |
| No. of restraints                                                     | 182                                                        |
| H-atom treatment                                                      | H-atom parameters constrained                              |
| $D\rho_{\text{max}}, D\rho_{\text{min}}$ ( $\text{e \AA}^{-3}$ )      | 1.55, -1.42                                                |

**Table S6. Geometric parameters ( $\text{\AA}, ^\circ$ )**

|        |            |           |           |
|--------|------------|-----------|-----------|
| C1—F1  | 1.451 (7)  | N2—H2     | 0.8800    |
| C1—C2  | 1.500 (9)  | C32—C33   | 1.3900    |
| C1—C9  | 1.537 (9)  | C32—C37   | 1.3900    |
| C1—H1  | 1.0000     | C33—C34   | 1.3900    |
| C2—C3  | 1.382 (8)  | C33—H33   | 0.9500    |
| C2—C7  | 1.383 (9)  | C34—C35   | 1.3900    |
| C3—C4  | 1.393 (8)  | C34—H34   | 0.9500    |
| C3—H3  | 0.9500     | C35—C36   | 1.3900    |
| C4—C5  | 1.393 (9)  | C35—Br2   | 1.875 (3) |
| C4—N1A | 1.413 (8)  | C36—C37   | 1.3900    |
| C4—N1  | 1.413 (8)  | C36—H36   | 0.9500    |
| C5—C6  | 1.377 (10) | C37—H37   | 0.9500    |
| C5—H5  | 0.9500     | C31A—O2A  | 1.23 (2)  |
| C6—C7  | 1.383 (10) | C31A—N2A  | 1.35 (2)  |
| C6—H6  | 0.9500     | C31A—C32A | 1.52 (2)  |
| C7—C8  | 1.510 (9)  | N2A—H2A   | 0.8800    |
| C8—C9  | 1.536 (10) | C32A—C33A | 1.3900    |
| C8—H8A | 0.9900     | C32A—C37A | 1.3900    |

|           |            |           |            |
|-----------|------------|-----------|------------|
| C8—H8B    | 0.9900     | C33A—C34A | 1.3900     |
| C9—F2     | 1.424 (7)  | C33A—H33A | 0.9500     |
| C9—C10    | 1.496 (10) | C34A—C35A | 1.3900     |
| C10—H10A  | 0.9800     | C34A—H34A | 0.9500     |
| C10—H10B  | 0.9800     | C35A—C36A | 1.3900     |
| C10—H10C  | 0.9800     | C35A—Br2A | 1.863 (19) |
| C11—O1    | 1.239 (11) | C36A—C37A | 1.3900     |
| C11—N1    | 1.364 (11) | C36A—H36A | 0.9500     |
| C11—C12   | 1.512 (10) | C37A—H37A | 0.9500     |
| N1—H1A    | 0.8800     | C41—F5    | 1.455 (7)  |
| C12—C13   | 1.3900     | C41—C42   | 1.497 (8)  |
| C12—C17   | 1.3900     | C41—C49   | 1.546 (9)  |
| C13—C14   | 1.3900     | C41—H41   | 1.0000     |
| C13—H13   | 0.9500     | C42—C43   | 1.386 (8)  |
| C14—C15   | 1.3900     | C42—C47   | 1.395 (9)  |
| C14—H14   | 0.9500     | C43—C44   | 1.389 (8)  |
| C15—C16   | 1.3900     | C43—H43   | 0.9500     |
| C15—Br1   | 1.886 (6)  | C44—C45   | 1.405 (8)  |
| C16—C17   | 1.3900     | C44—N3A   | 1.409 (7)  |
| C16—H16   | 0.9500     | C44—N3    | 1.409 (7)  |
| C17—H17   | 0.9500     | C45—C46   | 1.373 (9)  |
| C11A—O1A  | 1.232 (14) | C45—H45   | 0.9500     |
| C11A—N1A  | 1.344 (14) | C46—C47   | 1.387 (9)  |
| C11A—C12A | 1.502 (14) | C46—H46   | 0.9500     |
| N1A—H1AA  | 0.8800     | C47—C48   | 1.499 (8)  |
| C12A—C13A | 1.3900     | C48—C49   | 1.522 (10) |
| C12A—C17A | 1.3900     | C48—H48A  | 0.9900     |
| C13A—C14A | 1.3900     | C48—H48B  | 0.9900     |
| C13A—H13A | 0.9500     | C49—F6    | 1.432 (7)  |
| C14A—C15A | 1.3900     | C49—C50   | 1.512 (9)  |
| C14A—H14A | 0.9500     | C50—H50A  | 0.9800     |
| C15A—C16A | 1.3900     | C50—H50B  | 0.9800     |
| C15A—Br1A | 1.863 (9)  | C50—H50C  | 0.9800     |
| C16A—C17A | 1.3900     | C51—O3    | 1.239 (9)  |
| C16A—H16A | 0.9500     | C51—N3    | 1.354 (7)  |
| C17A—H17A | 0.9500     | C51—C52   | 1.501 (7)  |
| C21—F3    | 1.462 (7)  | N3—H3A    | 0.8800     |
| C21—C22   | 1.509 (8)  | C52—C53   | 1.3900     |
| C21—C29   | 1.535 (9)  | C52—C57   | 1.3900     |
| C21—H21   | 1.0000     | C53—C54   | 1.3900     |
| C22—C23   | 1.377 (8)  | C53—H53   | 0.9500     |
| C22—C27   | 1.381 (9)  | C54—C55   | 1.3900     |
| C23—C24   | 1.406 (8)  | C54—H54   | 0.9500     |

|           |           |             |             |
|-----------|-----------|-------------|-------------|
| C23—H23   | 0.9500    | C55—C56     | 1.3900      |
| C24—C25   | 1.391 (8) | C55—Br3     | 1.878 (3)   |
| C24—N2A   | 1.416 (8) | C56—C57     | 1.3900      |
| C24—N2    | 1.416 (8) | C56—H56     | 0.9500      |
| C25—C26   | 1.382 (9) | C57—H57     | 0.9500      |
| C25—H25   | 0.9500    | C51A—O3A    | 1.24 (2)    |
| C26—C27   | 1.385 (8) | C51A—N3A    | 1.36 (2)    |
| C26—H26   | 0.9500    | C51A—C52A   | 1.51 (2)    |
| C27—C28   | 1.506 (8) | N3A—H3AA    | 0.8800      |
| C28—C29   | 1.525 (9) | C52A—C53A   | 1.390 (2)   |
| C28—H28A  | 0.9900    | C52A—C57A   | 1.3900 (10) |
| C28—H28B  | 0.9900    | C53A—C54A   | 1.3900      |
| C29—F4    | 1.423 (7) | C53A—H53A   | 0.9500      |
| C29—C30   | 1.502 (9) | C54A—C55A   | 1.3900      |
| C30—H30A  | 0.9800    | C54A—H54A   | 0.9500      |
| C30—H30B  | 0.9800    | C55A—C56A   | 1.390 (2)   |
| C30—H30C  | 0.9800    | C55A—Br3A   | 1.890 (19)  |
| C31—O2    | 1.228 (8) | C56A—C57A   | 1.3900      |
| C31—N2    | 1.342 (7) | C56A—H56A   | 0.9500      |
| C31—C32   | 1.519 (7) | C57A—H57A   | 0.9500      |
| F1—C1—C2  | 114.3 (5) | N2—C31—C32  | 117.3 (5)   |
| F1—C1—C9  | 110.0 (5) | C31—N2—C24  | 125.8 (5)   |
| C2—C1—C9  | 104.6 (5) | C31—N2—H2   | 117.1       |
| F1—C1—H1  | 109.3     | C24—N2—H2   | 117.1       |
| C2—C1—H1  | 109.3     | C33—C32—C37 | 120.0       |
| C9—C1—H1  | 109.3     | C33—C32—C31 | 123.5 (3)   |
| C3—C2—C7  | 120.9 (6) | C37—C32—C31 | 116.4 (3)   |
| C3—C2—C1  | 129.7 (6) | C34—C33—C32 | 120.0       |
| C7—C2—C1  | 109.4 (6) | C34—C33—H33 | 120.0       |
| C2—C3—C4  | 118.8 (6) | C32—C33—H33 | 120.0       |
| C2—C3—H3  | 120.6     | C33—C34—C35 | 120.0       |
| C4—C3—H3  | 120.6     | C33—C34—H34 | 120.0       |
| C3—C4—C5  | 120.1 (6) | C35—C34—H34 | 120.0       |
| C3—C4—N1A | 117.8 (5) | C36—C35—C34 | 120.0       |
| C5—C4—N1A | 122.1 (6) | C36—C35—Br2 | 120.1 (2)   |
| C3—C4—N1  | 117.8 (5) | C34—C35—Br2 | 119.8 (2)   |
| C5—C4—N1  | 122.1 (6) | C35—C36—C37 | 120.0       |
| C6—C5—C4  | 120.3 (6) | C35—C36—H36 | 120.0       |
| C6—C5—H5  | 119.8     | C37—C36—H36 | 120.0       |
| C4—C5—H5  | 119.8     | C36—C37—C32 | 120.0       |
| C5—C6—C7  | 119.7 (6) | C36—C37—H37 | 120.0       |
| C5—C6—H6  | 120.2     | C32—C37—H37 | 120.0       |

|               |            |                |            |
|---------------|------------|----------------|------------|
| C7—C6—H6      | 120.2      | O2A—C31A—N2A   | 137 (10)   |
| C6—C7—C2      | 120.1 (6)  | O2A—C31A—C32A  | 116 (8)    |
| C6—C7—C8      | 129.2 (6)  | N2A—C31A—C32A  | 99 (3)     |
| C2—C7—C8      | 110.7 (6)  | C31A—N2A—C24   | 107.4 (16) |
| C7—C8—C9      | 103.7 (5)  | C31A—N2A—H2A   | 126.3      |
| C7—C8—H8A     | 111.0      | C24—N2A—H2A    | 126.3      |
| C9—C8—H8A     | 111.0      | C33A—C32A—C37A | 120.00 (6) |
| C7—C8—H8B     | 111.0      | C33A—C32A—C31A | 126 (6)    |
| C9—C8—H8B     | 111.0      | C37A—C32A—C31A | 114 (6)    |
| H8A—C8—H8B    | 109.0      | C34A—C33A—C32A | 120.00 (7) |
| F2—C9—C10     | 107.7 (6)  | C34A—C33A—H33A | 120.0      |
| F2—C9—C8      | 106.4 (5)  | C32A—C33A—H33A | 120.0      |
| C10—C9—C8     | 116.2 (6)  | C33A—C34A—C35A | 120.0      |
| F2—C9—C1      | 106.0 (5)  | C33A—C34A—H34A | 120.0      |
| C10—C9—C1     | 116.1 (6)  | C35A—C34A—H34A | 120.0      |
| C8—C9—C1      | 103.7 (5)  | C36A—C35A—C34A | 120.00 (5) |
| C9—C10—H10A   | 109.5      | C36A—C35A—Br2A | 116 (4)    |
| C9—C10—H10B   | 109.5      | C34A—C35A—Br2A | 124 (4)    |
| H10A—C10—H10B | 109.5      | C35A—C36A—C37A | 120.00 (6) |
| C9—C10—H10C   | 109.5      | C35A—C36A—H36A | 120.0      |
| H10A—C10—H10C | 109.5      | C37A—C36A—H36A | 120.0      |
| H10B—C10—H10C | 109.5      | C36A—C37A—C32A | 120.0      |
| O1—C11—N1     | 118.6 (17) | C36A—C37A—H37A | 120.0      |
| O1—C11—C12    | 119.4 (14) | C32A—C37A—H37A | 120.0      |
| N1—C11—C12    | 121.7 (9)  | F5—C41—C42     | 114.5 (5)  |
| C11—N1—C4     | 129.4 (8)  | F5—C41—C49     | 110.4 (5)  |
| C11—N1—H1A    | 115.3      | C42—C41—C49    | 104.0 (5)  |
| C4—N1—H1A     | 115.3      | F5—C41—H41     | 109.3      |
| C13—C12—C17   | 120.0      | C42—C41—H41    | 109.3      |
| C13—C12—C11   | 122.2 (7)  | C49—C41—H41    | 109.3      |
| C17—C12—C11   | 117.8 (7)  | C43—C42—C47    | 121.3 (6)  |
| C14—C13—C12   | 120.0      | C43—C42—C41    | 129.6 (6)  |
| C14—C13—H13   | 120.0      | C47—C42—C41    | 109.1 (5)  |
| C12—C13—H13   | 120.0      | C42—C43—C44    | 118.7 (6)  |
| C13—C14—C15   | 120.0      | C42—C43—H43    | 120.6      |
| C13—C14—H14   | 120.0      | C44—C43—H43    | 120.6      |
| C15—C14—H14   | 120.0      | C43—C44—C45    | 120.0 (6)  |
| C16—C15—C14   | 120.0      | C43—C44—N3A    | 118.9 (5)  |
| C16—C15—Br1   | 119.3 (5)  | C45—C44—N3A    | 121.1 (5)  |
| C14—C15—Br1   | 120.6 (5)  | C43—C44—N3     | 118.9 (5)  |
| C17—C16—C15   | 120.0      | C45—C44—N3     | 121.1 (5)  |
| C17—C16—H16   | 120.0      | C46—C45—C44    | 120.5 (6)  |
| C15—C16—H16   | 120.0      | C46—C45—H45    | 119.8      |

|                |            |               |           |
|----------------|------------|---------------|-----------|
| C16—C17—C12    | 120.0      | C44—C45—H45   | 119.8     |
| C16—C17—H17    | 120.0      | C45—C46—C47   | 120.0 (6) |
| C12—C17—H17    | 120.0      | C45—C46—H46   | 120.0     |
| O1A—C11A—N1A   | 130 (2)    | C47—C46—H46   | 120.0     |
| O1A—C11A—C12A  | 120 (2)    | C46—C47—C42   | 119.4 (6) |
| N1A—C11A—C12A  | 110.2 (11) | C46—C47—C48   | 129.2 (6) |
| C11A—N1A—C4    | 118.7 (9)  | C42—C47—C48   | 111.3 (5) |
| C11A—N1A—H1AA  | 120.7      | C47—C48—C49   | 103.6 (5) |
| C4—N1A—H1AA    | 120.7      | C47—C48—H48A  | 111.0     |
| C13A—C12A—C17A | 120.0      | C49—C48—H48A  | 111.0     |
| C13A—C12A—C11A | 124.2 (12) | C47—C48—H48B  | 111.0     |
| C17A—C12A—C11A | 115.6 (11) | C49—C48—H48B  | 111.0     |
| C12A—C13A—C14A | 120.0      | H48A—C48—H48B | 109.0     |
| C12A—C13A—H13A | 120.0      | F6—C49—C50    | 106.9 (5) |
| C14A—C13A—H13A | 120.0      | F6—C49—C48    | 106.7 (5) |
| C15A—C14A—C13A | 120.0      | C50—C49—C48   | 116.4 (6) |
| C15A—C14A—H14A | 120.0      | F6—C49—C41    | 105.5 (5) |
| C13A—C14A—H14A | 120.0      | C50—C49—C41   | 115.7 (6) |
| C14A—C15A—C16A | 120.0      | C48—C49—C41   | 104.9 (5) |
| C14A—C15A—Br1A | 121.6 (7)  | C49—C50—H50A  | 109.5     |
| C16A—C15A—Br1A | 118.4 (7)  | C49—C50—H50B  | 109.5     |
| C17A—C16A—C15A | 120.0      | H50A—C50—H50B | 109.5     |
| C17A—C16A—H16A | 120.0      | C49—C50—H50C  | 109.5     |
| C15A—C16A—H16A | 120.0      | H50A—C50—H50C | 109.5     |
| C16A—C17A—C12A | 120.0      | H50B—C50—H50C | 109.5     |
| C16A—C17A—H17A | 120.0      | O3—C51—N3     | 124.0 (7) |
| C12A—C17A—H17A | 120.0      | O3—C51—C52    | 119.1 (6) |
| F3—C21—C22     | 113.8 (5)  | N3—C51—C52    | 116.9 (6) |
| F3—C21—C29     | 110.2 (5)  | C51—N3—C44    | 124.5 (5) |
| C22—C21—C29    | 104.0 (5)  | C51—N3—H3A    | 117.8     |
| F3—C21—H21     | 109.6      | C44—N3—H3A    | 117.8     |
| C22—C21—H21    | 109.6      | C53—C52—C57   | 120.0     |
| C29—C21—H21    | 109.6      | C53—C52—C51   | 123.3 (4) |
| C23—C22—C27    | 121.5 (5)  | C57—C52—C51   | 116.5 (4) |
| C23—C22—C21    | 129.1 (6)  | C52—C53—C54   | 120.0     |
| C27—C22—C21    | 109.4 (5)  | C52—C53—H53   | 120.0     |
| C22—C23—C24    | 118.5 (5)  | C54—C53—H53   | 120.0     |
| C22—C23—H23    | 120.7      | C53—C54—C55   | 120.0     |
| C24—C23—H23    | 120.7      | C53—C54—H54   | 120.0     |
| C25—C24—C23    | 120.1 (6)  | C55—C54—H54   | 120.0     |
| C25—C24—N2A    | 121.8 (5)  | C56—C55—C54   | 120.0     |
| C23—C24—N2A    | 118.0 (5)  | C56—C55—Br3   | 118.8 (2) |
| C25—C24—N2     | 121.8 (5)  | C54—C55—Br3   | 121.2 (2) |

|               |            |                 |             |
|---------------|------------|-----------------|-------------|
| C23—C24—N2    | 118.0 (5)  | C55—C56—C57     | 120.0       |
| C26—C25—C24   | 120.0 (6)  | C55—C56—H56     | 120.0       |
| C26—C25—H25   | 120.0      | C57—C56—H56     | 120.0       |
| C24—C25—H25   | 120.0      | C56—C57—C52     | 120.0       |
| C25—C26—C27   | 119.9 (6)  | C56—C57—H57     | 120.0       |
| C25—C26—H26   | 120.0      | C52—C57—H57     | 120.0       |
| C27—C26—H26   | 120.0      | O3A—C51A—N3A    | 101 (9)     |
| C22—C27—C26   | 119.9 (6)  | O3A—C51A—C52A   | 122 (10)    |
| C22—C27—C28   | 110.6 (5)  | N3A—C51A—C52A   | 131 (4)     |
| C26—C27—C28   | 129.5 (6)  | C51A—N3A—C44    | 142 (4)     |
| C27—C28—C29   | 103.9 (5)  | C51A—N3A—H3AA   | 109.2       |
| C27—C28—H28A  | 111.0      | C44—N3A—H3AA    | 109.2       |
| C29—C28—H28A  | 111.0      | C53A—C52A—C57A  | 120.0       |
| C27—C28—H28B  | 111.0      | C53A—C52A—C51A  | 115 (6)     |
| C29—C28—H28B  | 111.0      | C57A—C52A—C51A  | 124 (5)     |
| H28A—C28—H28B | 109.0      | C52A—C53A—C54A  | 120.00 (7)  |
| F4—C29—C30    | 107.7 (5)  | C52A—C53A—H53A  | 120.0       |
| F4—C29—C28    | 107.0 (5)  | C54A—C53A—H53A  | 120.0       |
| C30—C29—C28   | 117.0 (6)  | C55A—C54A—C53A  | 120.00 (17) |
| F4—C29—C21    | 105.8 (5)  | C55A—C54A—H54A  | 120.0       |
| C30—C29—C21   | 114.6 (6)  | C53A—C54A—H54A  | 120.0       |
| C28—C29—C21   | 104.1 (5)  | C54A—C55A—C56A  | 120.00 (7)  |
| C29—C30—H30A  | 109.5      | C54A—C55A—Br3A  | 118 (4)     |
| C29—C30—H30B  | 109.5      | C56A—C55A—Br3A  | 121 (4)     |
| H30A—C30—H30B | 109.5      | C55A—C56A—C57A  | 120.00 (6)  |
| C29—C30—H30C  | 109.5      | C55A—C56A—H56A  | 120.0       |
| H30A—C30—H30C | 109.5      | C57A—C56A—H56A  | 120.0       |
| H30B—C30—H30C | 109.5      | C56A—C57A—C52A  | 120.00 (16) |
| O2—C31—N2     | 123.0 (6)  | C56A—C57A—H57A  | 120.0       |
| O2—C31—C32    | 119.5 (5)  | C52A—C57A—H57A  | 120.0       |
| F1—C1—C2—C3   | 41.3 (9)   | C23—C24—N2—C31  | -140.7 (7)  |
| C9—C1—C2—C3   | 161.6 (6)  | O2—C31—C32—C33  | 170.1 (6)   |
| F1—C1—C2—C7   | -138.8 (6) | N2—C31—C32—C33  | -5.3 (8)    |
| C9—C1—C2—C7   | -18.4 (7)  | O2—C31—C32—C37  | -8.4 (9)    |
| C7—C2—C3—C4   | 0.8 (9)    | N2—C31—C32—C37  | 176.2 (5)   |
| C1—C2—C3—C4   | -179.3 (6) | C37—C32—C33—C34 | 0.0         |
| C2—C3—C4—C5   | -2.8 (9)   | C31—C32—C33—C34 | -178.5 (6)  |
| C2—C3—C4—N1A  | 177.2 (5)  | C32—C33—C34—C35 | 0.0         |
| C2—C3—C4—N1   | 177.2 (5)  | C33—C34—C35—C36 | 0.0         |
| C3—C4—C5—C6   | 2.6 (10)   | C33—C34—C35—Br2 | -177.3 (4)  |
| N1A—C4—C5—C6  | -177.4 (6) | C34—C35—C36—C37 | 0.0         |
| N1—C4—C5—C6   | -177.4 (6) | Br2—C35—C36—C37 | 177.3 (4)   |

|                 |             |                     |            |
|-----------------|-------------|---------------------|------------|
| C4—C5—C6—C7     | -0.3 (10)   | C35—C36—C37—C32     | 0.0        |
| C5—C6—C7—C2     | -1.8 (10)   | C33—C32—C37—C36     | 0.0        |
| C5—C6—C7—C8     | 178.3 (7)   | C31—C32—C37—C36     | 178.6 (5)  |
| C3—C2—C7—C6     | 1.6 (10)    | O2A—C31A—N2A—C24    | -31 (21)   |
| C1—C2—C7—C6     | -178.4 (6)  | C32A—C31A—N2A—C24   | -179 (6)   |
| C3—C2—C7—C8     | -178.5 (6)  | C25—C24—N2A—C31A    | 43 (7)     |
| C1—C2—C7—C8     | 1.5 (7)     | C23—C24—N2A—C31A    | -137 (7)   |
| C6—C7—C8—C9     | -164.2 (7)  | O2A—C31A—C32A—C33A  | 165 (12)   |
| C2—C7—C8—C9     | 16.0 (7)    | N2A—C31A—C32A—C33A  | -39 (13)   |
| C7—C8—C9—F2     | 85.3 (6)    | O2A—C31A—C32A—C37A  | -5 (17)    |
| C7—C8—C9—C10    | -154.8 (6)  | N2A—C31A—C32A—C37A  | 151 (7)    |
| C7—C8—C9—C1     | -26.2 (6)   | C37A—C32A—C33A—C34A | 0.00 (8)   |
| F1—C1—C9—F2     | 38.6 (7)    | C31A—C32A—C33A—C34A | -170 (10)  |
| C2—C1—C9—F2     | -84.5 (6)   | C32A—C33A—C34A—C35A | 0.00 (8)   |
| F1—C1—C9—C10    | -80.9 (7)   | C33A—C34A—C35A—C36A | 0.00 (7)   |
| C2—C1—C9—C10    | 156.0 (6)   | C33A—C34A—C35A—Br2A | -176 (7)   |
| F1—C1—C9—C8     | 150.4 (5)   | C34A—C35A—C36A—C37A | 0.00 (7)   |
| C2—C1—C9—C8     | 27.3 (6)    | Br2A—C35A—C36A—C37A | 176 (6)    |
| O1—C11—N1—C4    | -9 (4)      | C35A—C36A—C37A—C32A | 0.00 (8)   |
| C12—C11—N1—C4   | 165.5 (13)  | C33A—C32A—C37A—C36A | 0.00 (9)   |
| C3—C4—N1—C11    | -139.5 (18) | C31A—C32A—C37A—C36A | 171 (9)    |
| C5—C4—N1—C11    | 40.5 (19)   | F5—C41—C42—C43      | 42.6 (9)   |
| O1—C11—C12—C13  | 163 (3)     | C49—C41—C42—C43     | 163.1 (6)  |
| N1—C11—C12—C13  | -11 (3)     | F5—C41—C42—C47      | -138.1 (5) |
| O1—C11—C12—C17  | -16 (4)     | C49—C41—C42—C47     | -17.6 (6)  |
| N1—C11—C12—C17  | 169.8 (18)  | C47—C42—C43—C44     | 0.7 (9)    |
| C17—C12—C13—C14 | 0.0         | C41—C42—C43—C44     | 179.9 (6)  |
| C11—C12—C13—C14 | -179.2 (16) | C42—C43—C44—C45     | -2.4 (9)   |
| C12—C13—C14—C15 | 0.0         | C42—C43—C44—N3A     | 177.9 (5)  |
| C13—C14—C15—C16 | 0.0         | C42—C43—C44—N3      | 177.9 (5)  |
| C13—C14—C15—Br1 | -176.8 (8)  | C43—C44—C45—C46     | 1.9 (9)    |



|                     |             |                 |            |
|---------------------|-------------|-----------------|------------|
| C14—C15—C16—C17     | 0.0         | N3A—C44—C45—C46 | -178.5 (6) |
| Br1—C15—C16—C17     | 176.9 (8)   | N3—C44—C45—C46  | -178.5 (6) |
| C15—C16—C17—C12     | 0.0         | C44—C45—C46—C47 | 0.6 (9)    |
| C13—C12—C17—C16     | 0.0         | C45—C46—C47—C42 | -2.4 (9)   |
| C11—C12—C17—C16     | 179.2 (15)  | C45—C46—C47—C48 | 178.1 (6)  |
| O1A—C11A—N1A—C4     | -4 (6)      | C43—C42—C47—C46 | 1.8 (9)    |
| C12A—C11A—N1A—C4    | 175.0 (16)  | C41—C42—C47—C46 | -177.6 (6) |
| C3—C4—N1A—C11A      | -146 (2)    | C43—C42—C47—C48 | -178.6 (6) |
| C5—C4—N1A—C11A      | 34 (2)      | C41—C42—C47—C48 | 2.0 (7)    |
| O1A—C11A—C12A—C13A  | 148 (4)     | C46—C47—C48—C49 | -165.7 (6) |
| N1A—C11A—C12A—C13A  | -31 (4)     | C42—C47—C48—C49 | 14.7 (7)   |
| O1A—C11A—C12A—C17A  | -27 (5)     | C47—C48—C49—F6  | 87.0 (6)   |
| N1A—C11A—C12A—C17A  | 154 (2)     | C47—C48—C49—C50 | -153.8 (6) |
| C17A—C12A—C13A—C14A | 0.0         | C47—C48—C49—C41 | -24.7 (6)  |
| C11A—C12A—C13A—C14A | -174 (2)    | F5—C41—C49—F6   | 36.8 (6)   |
| C12A—C13A—C14A—C15A | 0.0         | C42—C41—C49—F6  | -86.4 (6)  |
| C13A—C14A—C15A—C16A | 0.0         | F5—C41—C49—C50  | -81.1 (7)  |
| C13A—C14A—C15A—Br1A | 178.9 (11)  | C42—C41—C49—C50 | 155.6 (6)  |
| C14A—C15A—C16A—C17A | 0.0         | F5—C41—C49—C48  | 149.3 (5)  |
| Br1A—C15A—C16A—C17A | -178.9 (11) | C42—C41—C49—C48 | 26.0 (6)   |
| C15A—C16A—C17A—C12A | 0.0         | O3—C51—N3—C44   | -3.5 (13)  |
| C13A—C12A—C17A—C16A | 0.0         | C52—C51—N3—C44  | 175.5 (5)  |
| C11A—C12A—C17A—C16A | 175 (2)     | C43—C44—N3—C51  | -144.1 (7) |
| F3—C21—C22—C23      | 42.6 (9)    | C45—C44—N3—C51  | 36.2 (9)   |
| C29—C21—C22—C23     | 162.5 (6)   | O3—C51—C52—C53  | 147.4 (7)  |
| F3—C21—C22—C27      | -138.0 (5)  | N3—C51—C52—C53  | -31.6 (8)  |
| C29—C21—C22—C27     | -18.1 (7)   | O3—C51—C52—C57  | -27.3 (10) |
| C27—C22—C23—C24     | 0.8 (9)     | N3—C51—C52—C57  | 153.6 (5)  |
| C21—C22—C23—C24     | -179.9 (6)  | C57—C52—C53—C54 | 0.0        |
| C22—C23—C24—C25     | -2.7 (9)    | C51—C52—C53—C54 | -174.6 (5) |
| C22—C23—C24—N2A     | 177.4 (5)   | C52—C53—C54—C55 | 0.0        |

|                 |            |                     |            |
|-----------------|------------|---------------------|------------|
| C22—C23—C24—N2  | 177.4 (5)  | C53—C54—C55—C56     | 0.0        |
| C23—C24—C25—C26 | 2.8 (9)    | C53—C54—C55—Br3     | 178.2 (3)  |
| N2A—C24—C25—C26 | -177.3 (6) | C54—C55—C56—C57     | 0.0        |
| N2—C24—C25—C26  | -177.3 (6) | Br3—C55—C56—C57     | -178.2 (3) |
| C24—C25—C26—C27 | -1.0 (9)   | C55—C56—C57—C52     | 0.0        |
| C23—C22—C27—C26 | 1.0 (9)    | C53—C52—C57—C56     | 0.0        |
| C21—C22—C27—C26 | -178.4 (6) | C51—C52—C57—C56     | 174.9 (5)  |
| C23—C22—C27—C28 | -179.4 (6) | O3A—C51A—N3A—C44    | -2 (20)    |
| C21—C22—C27—C28 | 1.2 (7)    | C52A—C51A—N3A—C44   | 149 (8)    |
| C25—C26—C27—C22 | -0.9 (9)   | C43—C44—N3A—C51A    | -147 (10)  |
| C25—C26—C27—C28 | 179.5 (6)  | C45—C44—N3A—C51A    | 34 (10)    |
| C22—C27—C28—C29 | 16.3 (7)   | O3A—C51A—C52A—C53A  | 179 (15)   |
| C26—C27—C28—C29 | -164.1 (6) | N3A—C51A—C52A—C53A  | 33 (17)    |
| C27—C28—C29—F4  | 85.3 (6)   | O3A—C51A—C52A—C57A  | -13 (21)   |
| C27—C28—C29—C30 | -154.0 (6) | N3A—C51A—C52A—C57A  | -159 (11)  |
| C27—C28—C29—C21 | -26.5 (6)  | C57A—C52A—C53A—C54A | 0.0        |
| F3—C21—C29—F4   | 37.0 (6)   | C51A—C52A—C53A—C54A | 169 (8)    |
| C22—C21—C29—F4  | -85.3 (5)  | C52A—C53A—C54A—C55A | 0.0        |
| F3—C21—C29—C30  | -81.5 (7)  | C53A—C54A—C55A—C56A | 0.0        |
| C22—C21—C29—C30 | 156.2 (6)  | C53A—C54A—C55A—Br3A | -169 (5)   |
| F3—C21—C29—C28  | 149.6 (5)  | C54A—C55A—C56A—C57A | 0.0        |
| C22—C21—C29—C28 | 27.2 (6)   | Br3A—C55A—C56A—C57A | 168 (6)    |
| O2—C31—N2—C24   | -7.4 (12)  | C55A—C56A—C57A—C52A | 0.0        |
| C32—C31—N2—C24  | 167.9 (5)  | C53A—C52A—C57A—C56A | 0.00 (6)   |
| C25—C24—N2—C31  | 39.4 (9)   | C51A—C52A—C57A—C56A | -168 (9)   |

**Table S7. Hydrogen-bond geometric parameters (Å, °)**

| D—H···A                     | D—H  | H···A | D···A    | D—H···A |
|-----------------------------|------|-------|----------|---------|
| N1—H1A···O1 <sup>i</sup>    | 0.88 | 2.05  | 2.90 (3) | 161     |
| N1A—H1AA···O1A <sup>i</sup> | 0.88 | 2.02  | 2.83 (4) | 153     |

|                                   |      |      |           |     |
|-----------------------------------|------|------|-----------|-----|
| N2—H2 $\cdots$ O2 <sup>i</sup>    | 0.88 | 2.03 | 2.865 (8) | 157 |
| N2A—H2A $\cdots$ O2A <sup>i</sup> | 0.88 | 1.96 | 2.72 (11) | 145 |
| N3—H3A $\cdots$ O3 <sup>ii</sup>  | 0.88 | 2.06 | 2.889 (7) | 158 |

Symmetry codes: (i)  $x-1/2, -y+3/2, z$ ; (ii)  $x+1/2, -y+3/2, z$ .

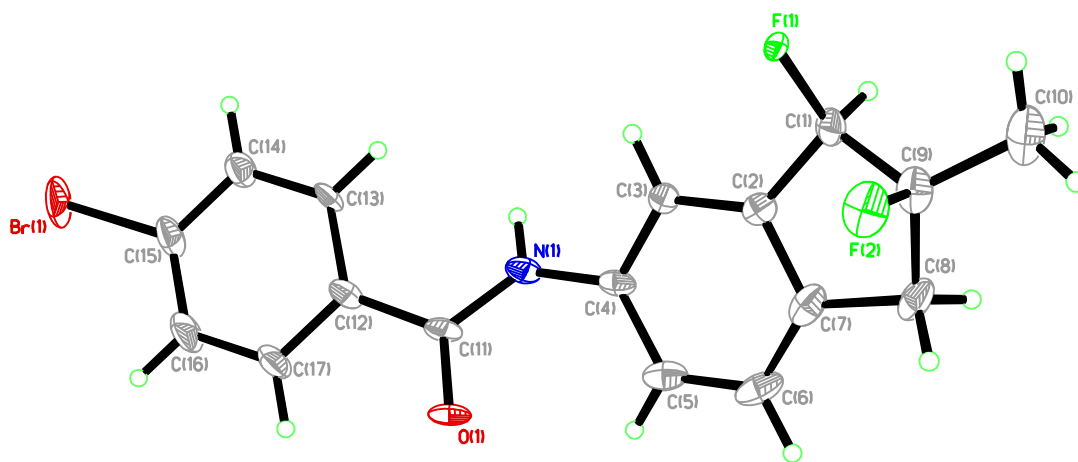

**Figure S4.** Perspective views showing 50% probability

displacement

### X-Ray Crystal Structure of 1,2-Difluoride ( $\pm$ )-S5j.

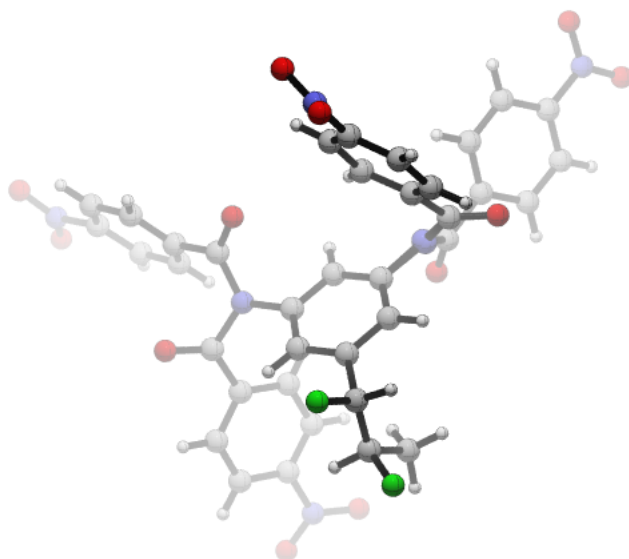

A crystal mounted on a diffractometer was collected data at 100 K. The intensities of the reflections were collected by means of a Bruker APEX II DUO CCD diffractometer ( $\text{Cu}_{K\alpha}$  radiation,  $\lambda=1.54178 \text{ \AA}$ ), and equipped with an Oxford Cryosystems nitrogen flow apparatus. The collection method involved  $1.0^\circ$  scans in  $\omega$  at  $-30^\circ$ ,  $-55^\circ$ ,  $-80^\circ$ ,  $30^\circ$ ,  $55^\circ$ ,  $80^\circ$  and  $115^\circ$  in  $2\theta$ . Data integration down to  $0.84 \text{ \AA}$  resolution was carried out using SAINT V8.34 C<sup>44</sup> with reflection spot size optimisation. Absorption corrections were made with the program SADABS.<sup>44</sup> The structure was solved by the Intrinsic Phasing methods and refined by least-squares methods against  $F^2$  using SHELXT-2014<sup>45</sup> and SHELXL-2014<sup>46</sup> with OLEX 2 interface.<sup>47</sup> Non-hydrogen atoms were refined anisotropically, and hydrogen atoms were allowed to ride on the respective atoms. The Ortep plots produced with SHELXL-2014 program, and the other drawings were produced with Accelrys DS Visualizer 2.0.<sup>48</sup>

**Table S8. Experimental details**

|                                                                       |                                                            |
|-----------------------------------------------------------------------|------------------------------------------------------------|
|                                                                       | JWM-VI-188A                                                |
| Crystal data                                                          |                                                            |
| Chemical formula                                                      | $C_{37}H_{24}F_2N_6O_{12}$                                 |
| $M_r$                                                                 | 782.62                                                     |
| Crystal system, space group                                           | Triclinic, $P-1$                                           |
| Temperature (K)                                                       | 100                                                        |
| $a, b, c$ (Å)                                                         | 8.3123 (3), 12.8636 (5), 16.7610 (6)                       |
| $\alpha, \beta, \gamma$ (°)                                           | 83.207 (2), 86.721 (3), 85.465 (3)                         |
| $V$ (Å <sup>3</sup> )                                                 | 1771.96 (11)                                               |
| $Z$                                                                   | 2                                                          |
| Radiation type                                                        | Cu $K\alpha$                                               |
| $\mu$ (mm <sup>-1</sup> )                                             | 1.02                                                       |
| Crystal size (mm)                                                     | 0.24 × 0.18 × 0.05                                         |
| Data collection                                                       |                                                            |
| Diffractometer                                                        | Bruker D8 goniometer with CCD area detector diffractometer |
| Absorption correction                                                 | Multi-scan<br><i>SADABS</i>                                |
| $T_{\min}, T_{\max}$                                                  | 0.699, 0.864                                               |
| No. of measured, independent and observed [ $I > 2s(I)$ ] reflections | 26788, 5963, 4189                                          |
| $R_{\text{int}}$                                                      | 0.054                                                      |
| $(\sin \theta/\lambda)_{\text{max}}$ (Å <sup>-1</sup> )               | 0.596                                                      |
| Refinement                                                            |                                                            |
| $R[F^2 > 2s(F^2)], wR(F^2), S$                                        | 0.062, 0.197, 1.04                                         |
| No. of reflections                                                    | 5963                                                       |
| No. of parameters                                                     | 542                                                        |
| No. of restraints                                                     | 19                                                         |
| H-atom treatment                                                      | H-atom parameters constrained                              |
| $D\rho_{\text{max}}, D\rho_{\text{min}}$ (e Å <sup>-3</sup> )         | 0.41, -0.38                                                |

**Table S9. Geometric parameters (Å, °)**

|          |            |           |            |
|----------|------------|-----------|------------|
| C1—C6    | 1.384 (5)  | C22—C23   | 1.378 (5)  |
| C1—C2    | 1.386 (4)  | C22—H22   | 0.9500     |
| C1—H1    | 0.9500     | C23—H23   | 0.9500     |
| C2—C3    | 1.386 (4)  | C24—O7    | 1.210 (4)  |
| C2—N1    | 1.435 (4)  | C24—N4A   | 1.427 (19) |
| C3—C4    | 1.379 (4)  | C24—N4    | 1.432 (5)  |
| C3—H3    | 0.9500     | C24—C25   | 1.472 (6)  |
| C4—C5    | 1.389 (5)  | C25—C30   | 1.396 (5)  |
| C4—N4    | 1.432 (4)  | C25—C26   | 1.401 (5)  |
| C4—N4A   | 1.444 (16) | C26—C27   | 1.371 (5)  |
| C5—C6    | 1.388 (5)  | C26—H26   | 0.9500     |
| C5—H5    | 0.9500     | C27—C28   | 1.376 (5)  |
| C6—C7A   | 1.504 (5)  | C27—H27   | 0.9500     |
| C6—C7    | 1.504 (5)  | C28—C29   | 1.390 (5)  |
| C7—F1    | 1.356 (6)  | C28—N5    | 1.450 (5)  |
| C7—C8    | 1.420 (8)  | C29—C30   | 1.366 (6)  |
| C7—H7    | 1.0000     | C29—H29   | 0.9500     |
| C8—F2    | 1.45 (4)   | C30—H30   | 0.9500     |
| C8—C9    | 1.473 (18) | N4A—C31A  | 1.36 (7)   |
| C8—H8    | 1.0000     | O10A—C31A | 1.22 (2)   |
| C9—H9A   | 0.9800     | C31A—C32A | 1.487 (19) |
| C9—H9B   | 0.9800     | C32A—C33A | 1.3900     |
| C9—H9C   | 0.9800     | C32A—C37A | 1.3900     |
| C7A—F1A  | 1.322 (7)  | C33A—C34A | 1.3900     |
| C7A—C8A  | 1.402 (8)  | C33A—H33A | 0.9500     |
| C7A—H7A  | 1.0000     | C34A—C35A | 1.3900     |
| C8A—F2A  | 1.45 (4)   | C34A—H34A | 0.9500     |
| C8A—C9A  | 1.480 (18) | C35A—C36A | 1.3900     |
| C8A—H8A  | 1.0000     | C35A—N6A  | 1.473 (17) |
| C9A—H9AA | 0.9800     | C36A—C37A | 1.3900     |
| C9A—H9AB | 0.9800     | C36A—H36A | 0.9500     |
| C9A—H9AC | 0.9800     | C37A—H37A | 0.9500     |
| C10—O1   | 1.205 (3)  | N6A—O11A  | 1.218 (19) |
| C10—N1   | 1.406 (4)  | N6A—O12A  | 1.23 (2)   |
| C10—C11  | 1.496 (4)  | N4—C31    | 1.389 (11) |
| C11—C16  | 1.377 (4)  | O10—C31   | 1.222 (6)  |
| C11—C12  | 1.393 (4)  | C31—C32   | 1.487 (5)  |
| C12—C13  | 1.378 (5)  | C32—C33   | 1.373 (5)  |
| C12—H12  | 0.9500     | C32—C37   | 1.3900     |
| C13—C14  | 1.376 (5)  | C33—C34   | 1.367 (4)  |
| C13—H13  | 0.9500     | C33—H33   | 0.9500     |

|           |            |             |            |
|-----------|------------|-------------|------------|
| C14—C15   | 1.379 (4)  | C34—C35     | 1.3900     |
| C14—N2    | 1.474 (4)  | C34—H34     | 0.9500     |
| C15—C16   | 1.386 (4)  | C35—C36     | 1.3900     |
| C15—H15   | 0.9500     | C35—N6      | 1.448 (4)  |
| C16—H16   | 0.9500     | C36—C37     | 1.3900     |
| C17—O4    | 1.205 (4)  | C36—H36     | 0.9500     |
| C17—N1    | 1.441 (3)  | C37—H37     | 0.9500     |
| C17—C18   | 1.480 (5)  | N6—O11      | 1.210 (5)  |
| C18—C23   | 1.393 (4)  | N6—O12      | 1.222 (5)  |
| C18—C19   | 1.396 (5)  | N2—O2       | 1.224 (4)  |
| C19—C20   | 1.381 (5)  | N2—O3       | 1.232 (4)  |
| C19—H19   | 0.9500     | N3—O6       | 1.224 (4)  |
| C20—C21   | 1.370 (5)  | N3—O5       | 1.235 (4)  |
| C20—H20   | 0.9500     | N5—O9       | 1.219 (4)  |
| C21—C22   | 1.382 (5)  | N5—O8       | 1.222 (4)  |
| C21—N3    | 1.474 (5)  |             |            |
| C6—C1—C2  | 120.1 (3)  | C23—C22—H22 | 120.8      |
| C6—C1—H1  | 119.9      | C21—C22—H22 | 120.8      |
| C2—C1—H1  | 119.9      | C22—C23—C18 | 120.8 (3)  |
| C3—C2—C1  | 120.8 (3)  | C22—C23—H23 | 119.6      |
| C3—C2—N1  | 118.8 (3)  | C18—C23—H23 | 119.6      |
| C1—C2—N1  | 120.4 (2)  | O7—C24—N4A  | 118.7 (11) |
| C4—C3—C2  | 118.6 (3)  | O7—C24—N4   | 121.0 (4)  |
| C4—C3—H3  | 120.7      | O7—C24—C25  | 122.8 (3)  |
| C2—C3—H3  | 120.7      | N4A—C24—C25 | 118.5 (11) |
| C3—C4—C5  | 121.3 (3)  | N4—C24—C25  | 116.2 (3)  |
| C3—C4—N4  | 120.1 (3)  | C30—C25—C26 | 119.3 (4)  |
| C5—C4—N4  | 118.5 (3)  | C30—C25—C24 | 119.2 (3)  |
| C3—C4—N4A | 122.1 (12) | C26—C25—C24 | 121.2 (3)  |
| C5—C4—N4A | 116.6 (12) | C27—C26—C25 | 121.2 (3)  |
| C6—C5—C4  | 119.6 (3)  | C27—C26—H26 | 119.4      |
| C6—C5—H5  | 120.2      | C25—C26—H26 | 119.4      |
| C4—C5—H5  | 120.2      | C26—C27—C28 | 117.9 (3)  |
| C1—C6—C5  | 119.6 (3)  | C26—C27—H27 | 121.1      |
| C1—C6—C7A | 121.1 (3)  | C28—C27—H27 | 121.1      |
| C5—C6—C7A | 119.3 (3)  | C27—C28—C29 | 122.6 (4)  |
| C1—C6—C7  | 121.1 (3)  | C27—C28—N5  | 118.0 (3)  |
| C5—C6—C7  | 119.3 (3)  | C29—C28—N5  | 119.4 (3)  |
| F1—C7—C8  | 118.0 (5)  | C30—C29—C28 | 119.0 (3)  |
| F1—C7—C6  | 112.0 (3)  | C30—C29—H29 | 120.5      |
| C8—C7—C6  | 113.1 (4)  | C28—C29—H29 | 120.5      |
| F1—C7—H7  | 103.9      | C29—C30—C25 | 120.0 (3)  |
| C8—C7—H7  | 103.9      | C29—C30—H30 | 120.0      |

|               |            |                |             |
|---------------|------------|----------------|-------------|
| C6—C7—H7      | 103.9      | C25—C30—H30    | 120.0       |
| C7—C8—F2      | 105 (2)    | C31A—N4A—C24   | 125 (2)     |
| C7—C8—C9      | 120.5 (15) | C31A—N4A—C4    | 118 (2)     |
| F2—C8—C9      | 107 (2)    | C24—N4A—C4     | 116.2 (14)  |
| C7—C8—H8      | 108.2      | O10A—C31A—N4A  | 124 (6)     |
| F2—C8—H8      | 108.2      | O10A—C31A—C32A | 117 (10)    |
| C9—C8—H8      | 108.2      | N4A—C31A—C32A  | 119 (5)     |
| C8—C9—H9A     | 109.5      | C33A—C32A—C37A | 120.0       |
| C8—C9—H9B     | 109.5      | C33A—C32A—C31A | 119 (5)     |
| H9A—C9—H9B    | 109.5      | C37A—C32A—C31A | 120 (5)     |
| C8—C9—H9C     | 109.5      | C34A—C33A—C32A | 120.0       |
| H9A—C9—H9C    | 109.5      | C34A—C33A—H33A | 120.0       |
| H9B—C9—H9C    | 109.5      | C32A—C33A—H33A | 120.0       |
| F1A—C7A—C8A   | 120.0 (6)  | C33A—C34A—C35A | 120.0       |
| F1A—C7A—C6    | 110.6 (4)  | C33A—C34A—H34A | 120.0       |
| C8A—C7A—C6    | 118.7 (5)  | C35A—C34A—H34A | 120.0       |
| F1A—C7A—H7A   | 101.0      | C36A—C35A—C34A | 120.0       |
| C8A—C7A—H7A   | 101.0      | C36A—C35A—N6A  | 105 (3)     |
| C6—C7A—H7A    | 101.0      | C34A—C35A—N6A  | 134 (2)     |
| C7A—C8A—F2A   | 107 (3)    | C37A—C36A—C35A | 120.0       |
| C7A—C8A—C9A   | 120.4 (15) | C37A—C36A—H36A | 120.0       |
| F2A—C8A—C9A   | 106 (3)    | C35A—C36A—H36A | 120.0       |
| C7A—C8A—H8A   | 107.7      | C36A—C37A—C32A | 120.0       |
| F2A—C8A—H8A   | 107.7      | C36A—C37A—H37A | 120.0       |
| C9A—C8A—H8A   | 107.7      | C32A—C37A—H37A | 120.0       |
| C8A—C9A—H9AA  | 109.5      | O11A—N6A—O12A  | 120 (3)     |
| C8A—C9A—H9AB  | 109.5      | O11A—N6A—C35A  | 132 (3)     |
| H9AA—C9A—H9AB | 109.5      | O12A—N6A—C35A  | 108 (3)     |
| C8A—C9A—H9AC  | 109.5      | C31—N4—C24     | 121.4 (5)   |
| H9AA—C9A—H9AC | 109.5      | C31—N4—C4      | 119.4 (4)   |
| H9AB—C9A—H9AC | 109.5      | C24—N4—C4      | 116.7 (4)   |
| O1—C10—N1     | 122.0 (3)  | O10—C31—N4     | 121.9 (7)   |
| O1—C10—C11    | 121.7 (3)  | O10—C31—C32    | 122.2 (12)  |
| N1—C10—C11    | 116.2 (2)  | N4—C31—C32     | 115.7 (7)   |
| C16—C11—C12   | 120.2 (3)  | C33—C32—C37    | 118.47 (17) |
| C16—C11—C10   | 118.5 (3)  | C33—C32—C31    | 124.0 (7)   |
| C12—C11—C10   | 121.2 (3)  | C37—C32—C31    | 117.6 (7)   |
| C13—C12—C11   | 120.0 (3)  | C34—C33—C32    | 122.9 (3)   |
| C13—C12—H12   | 120.0      | C34—C33—H33    | 118.5       |
| C11—C12—H12   | 120.0      | C32—C33—H33    | 118.5       |
| C14—C13—C12   | 118.4 (3)  | C35—C34—C33    | 118.6 (2)   |
| C14—C13—H13   | 120.8      | C35—C34—H34    | 120.7       |
| C12—C13—H13   | 120.8      | C33—C34—H34    | 120.7       |



|              |             |                         |            |
|--------------|-------------|-------------------------|------------|
| C13—C14—C15  | 123.1 (3)   | C34—C35—C36             | 120.0      |
| C13—C14—N2   | 118.6 (3)   | C34—C35—N6              | 119.9 (3)  |
| C15—C14—N2   | 118.4 (3)   | C36—C35—N6              | 120.1 (3)  |
| C14—C15—C16  | 117.7 (3)   | C35—C36—C37             | 120.0      |
| C14—C15—H15  | 121.1       | C35—C36—H36             | 120.0      |
| C16—C15—H15  | 121.1       | C37—C36—H36             | 120.0      |
| C11—C16—C15  | 120.6 (3)   | C36—C37—C32             | 120.0      |
| C11—C16—H16  | 119.7       | C36—C37—H37             | 120.0      |
| C15—C16—H16  | 119.7       | C32—C37—H37             | 120.0      |
| O4—C17—N1    | 119.9 (3)   | O11—N6—O12              | 124.2 (4)  |
| O4—C17—C18   | 122.9 (3)   | O11—N6—C35              | 117.3 (4)  |
| N1—C17—C18   | 117.1 (2)   | O12—N6—C35              | 118.5 (4)  |
| C23—C18—C19  | 118.9 (3)   | C10—N1—C2               | 118.0 (2)  |
| C23—C18—C17  | 118.2 (3)   | C10—N1—C17              | 120.0 (2)  |
| C19—C18—C17  | 122.9 (3)   | C2—N1—C17               | 118.7 (2)  |
| C20—C19—C18  | 120.7 (3)   | O2—N2—O3                | 124.5 (3)  |
| C20—C19—H19  | 119.6       | O2—N2—C14               | 118.1 (3)  |
| C18—C19—H19  | 119.6       | O3—N2—C14               | 117.4 (3)  |
| C21—C20—C19  | 118.7 (3)   | O6—N3—O5                | 124.0 (4)  |
| C21—C20—H20  | 120.7       | O6—N3—C21               | 118.1 (3)  |
| C19—C20—H20  | 120.7       | O5—N3—C21               | 117.9 (3)  |
| C20—C21—C22  | 122.4 (3)   | O9—N5—O8                | 123.2 (4)  |
| C20—C21—N3   | 118.3 (3)   | O9—N5—C28               | 118.6 (3)  |
| C22—C21—N3   | 119.3 (3)   | O8—N5—C28               | 118.2 (3)  |
| C23—C22—C21  | 118.5 (3)   |                         |            |
| C6—C1—C2—C3  | -1.1 (5)    | C3—C4—N4A—C31A          | -53 (7)    |
| C6—C1—C2—N1  | -178.9 (3)  | C5—C4—N4A—C31A          | 128 (7)    |
| C1—C2—C3—C4  | -1.0 (5)    | C3—C4—N4A—C24           | 129.0 (17) |
| N1—C2—C3—C4  | 176.9 (3)   | C5—C4—N4A—C24           | -50 (3)    |
| C2—C3—C4—C5  | 1.7 (5)     | C24—N4A—C31A—O10A       | 168 (10)   |
| C2—C3—C4—N4  | -175.1 (3)  | C4—N4A—C31A—O10A        | -10 (17)   |
| C2—C3—C4—N4A | -177.2 (13) | C24—N4A—C31A—C32A       | -12 (15)   |
| C3—C4—C5—C6  | -0.3 (5)    | C4—N4A—C31A—C32A        | 169 (8)    |
| N4—C4—C5—C6  | 176.5 (4)   | O10A—C31A—C32A—<br>C33A | 130 (11)   |
| N4A—C4—C5—C6 | 178.6 (12)  | N4A—C31A—C32A—<br>C33A  | -50 (14)   |
| C2—C1—C6—C5  | 2.4 (5)     | O10A—C31A—C32A—<br>C37A | -40 (15)   |
| C2—C1—C6—C7A | -175.5 (3)  | N4A—C31A—C32A—<br>C37A  | 141 (8)    |
| C2—C1—C6—C7  | -175.5 (3)  | C37A—C32A—C33A—<br>C34A | 0.0        |

|                 |            |                     |            |
|-----------------|------------|---------------------|------------|
| C4—C5—C6—C1     | -1.8 (5)   | C31A—C32A—C33A—C34A | -169 (6)   |
| C4—C5—C6—C7A    | 176.2 (3)  | C32A—C33A—C34A—C35A | 0.0        |
| C4—C5—C6—C7     | 176.2 (3)  | C33A—C34A—C35A—C36A | 0.0        |
| C1—C6—C7—F1     | -55.6 (6)  | C33A—C34A—C35A—N6A  | -165 (4)   |
| C5—C6—C7—F1     | 126.4 (5)  | C34A—C35A—C36A—C37A | 0.0        |
| C1—C6—C7—C8     | 80.7 (5)   | N6A—C35A—C36A—C37A  | 169 (3)    |
| C5—C6—C7—C8     | -97.3 (5)  | C35A—C36A—C37A—C32A | 0.0        |
| F1—C7—C8—F2     | -63 (4)    | C33A—C32A—C37A—C36A | 0.0        |
| C6—C7—C8—F2     | 163 (4)    | C31A—C32A—C37A—C36A | 169 (7)    |
| F1—C7—C8—C9     | 177.1 (16) | C36A—C35A—N6A—O11A  | -4 (6)     |
| C6—C7—C8—C9     | 43.7 (17)  | C34A—C35A—N6A—O11A  | 163 (5)    |
| C1—C6—C7A—F1A   | -94.4 (5)  | C36A—C35A—N6A—O12A  | 179 (3)    |
| C5—C6—C7A—F1A   | 87.6 (5)   | C34A—C35A—N6A—O12A  | -14 (6)    |
| C1—C6—C7A—C8A   | 121.1 (6)  | O7—C24—N4—C31       | -29.8 (9)  |
| C5—C6—C7A—C8A   | -56.9 (7)  | C25—C24—N4—C31      | 147.3 (8)  |
| F1A—C7A—C8A—F2A | 54 (6)     | O7—C24—N4—C4        | 132.1 (4)  |
| C6—C7A—C8A—F2A  | -165 (6)   | C25—C24—N4—C4       | -50.8 (5)  |
| F1A—C7A—C8A—C9A | 175 (2)    | C3—C4—N4—C31        | -65.4 (9)  |
| C6—C7A—C8A—C9A  | -44 (2)    | C5—C4—N4—C31        | 117.7 (9)  |
| O1—C10—C11—C16  | -41.1 (4)  | C3—C4—N4—C24        | 132.3 (4)  |
| N1—C10—C11—C16  | 143.1 (3)  | C5—C4—N4—C24        | -44.5 (6)  |
| O1—C10—C11—C12  | 135.4 (3)  | C24—N4—C31—O10      | 154.9 (12) |
| N1—C10—C11—C12  | -40.4 (4)  | C4—N4—C31—O10       | -6.5 (19)  |
| C16—C11—C12—C13 | -1.1 (4)   | C24—N4—C31—C32      | -30.6 (16) |
| C10—C11—C12—C13 | -177.5 (3) | C4—N4—C31—C32       | 168.0 (9)  |
| C11—C12—C13—C14 | -0.5 (4)   | O10—C31—C32—C33     | 133.3 (13) |
| C12—C13—C14—C15 | 1.8 (4)    | N4—C31—C32—C33      | -41.1 (16) |
| C12—C13—C14—N2  | -177.1 (3) | O10—C31—C32—C37     | -45.8 (18) |
| C13—C14—C15—C16 | -1.3 (4)   | N4—C31—C32—C37      | 139.8 (9)  |
| N2—C14—C15—C16  | 177.6 (2)  | C37—C32—C33—C34     | -1.4 (7)   |
| C12—C11—C16—C15 | 1.6 (4)    | C31—C32—C33—C34     | 179.6 (8)  |
| C10—C11—C16—C15 | 178.1 (2)  | C32—C33—C34—C35     | 1.4 (7)    |

|                  |            |                 |            |
|------------------|------------|-----------------|------------|
| C14—C15—C16—C11  | -0.4 (4)   | C33—C34—C35—C36 | -0.7 (3)   |
| O4—C17—C18—C23   | -17.4 (6)  | C33—C34—C35—N6  | 178.9 (5)  |
| N1—C17—C18—C23   | 165.5 (3)  | C34—C35—C36—C37 | 0.0        |
| O4—C17—C18—C19   | 159.8 (4)  | N6—C35—C36—C37  | -179.5 (4) |
| N1—C17—C18—C19   | -17.3 (5)  | C35—C36—C37—C32 | 0.0        |
| C23—C18—C19—C20  | -2.0 (6)   | C33—C32—C37—C36 | 0.6 (3)    |
| C17—C18—C19—C20  | -179.2 (3) | C31—C32—C37—C36 | 179.8 (8)  |
| C18—C19—C20—C21  | 0.7 (6)    | C34—C35—N6—O11  | 177.9 (4)  |
| C19—C20—C21—C22  | 1.9 (7)    | C36—C35—N6—O11  | -2.5 (6)   |
| C19—C20—C21—N3   | 179.4 (4)  | C34—C35—N6—O12  | -2.1 (6)   |
| C20—C21—C22—C23  | -3.1 (7)   | C36—C35—N6—O12  | 177.4 (4)  |
| N3—C21—C22—C23   | 179.5 (4)  | O1—C10—N1—C2    | -9.4 (4)   |
| C21—C22—C23—C18  | 1.7 (6)    | C11—C10—N1—C2   | 166.4 (3)  |
| C19—C18—C23—C22  | 0.8 (6)    | O1—C10—N1—C17   | 149.9 (3)  |
| C17—C18—C23—C22  | 178.1 (4)  | C11—C10—N1—C17  | -34.3 (4)  |
| O7—C24—C25—C30   | -26.7 (5)  | C3—C2—N1—C10    | -54.9 (4)  |
| N4A—C24—C25—C30  | 154.6 (12) | C1—C2—N1—C10    | 122.9 (3)  |
| N4—C24—C25—C30   | 156.3 (3)  | C3—C2—N1—C17    | 145.5 (3)  |
| O7—C24—C25—C26   | 147.0 (3)  | C1—C2—N1—C17    | -36.7 (4)  |
| N4A—C24—C25—C26  | -31.7 (13) | O4—C17—N1—C10   | -28.1 (5)  |
| N4—C24—C25—C26   | -30.0 (4)  | C18—C17—N1—C10  | 149.1 (3)  |
| C30—C25—C26—C27  | 2.8 (5)    | O4—C17—N1—C2    | 131.1 (4)  |
| C24—C25—C26—C27  | -170.8 (3) | C18—C17—N1—C2   | -51.7 (4)  |
| C25—C26—C27—C28  | -2.7 (5)   | C13—C14—N2—O2   | -176.0 (3) |
| C26—C27—C28—C29  | 0.6 (5)    | C15—C14—N2—O2   | 5.1 (4)    |
| C26—C27—C28—N5   | 179.8 (3)  | C13—C14—N2—O3   | 4.5 (4)    |
| C27—C28—C29—C30  | 1.4 (5)    | C15—C14—N2—O3   | -174.4 (3) |
| N5—C28—C29—C30   | -177.8 (3) | C20—C21—N3—O6   | 18.1 (6)   |
| C28—C29—C30—C25  | -1.3 (5)   | C22—C21—N3—O6   | -164.3 (4) |
| C26—C25—C30—C29  | -0.7 (5)   | C20—C21—N3—O5   | -161.9 (4) |
| C24—C25—C30—C29  | 173.0 (3)  | C22—C21—N3—O5   | 15.7 (6)   |
| O7—C24—N4A—C31A  | -43 (8)    | C27—C28—N5—O9   | -23.1 (4)  |
| C25—C24—N4A—C31A | 136 (8)    | C29—C28—N5—O9   | 156.2 (3)  |
| O7—C24—N4A—C4    | 135.6 (17) | C27—C28—N5—O8   | 156.0 (3)  |
| C25—C24—N4A—C4   | -46 (3)    | C29—C28—N5—O8   | -24.7 (4)  |

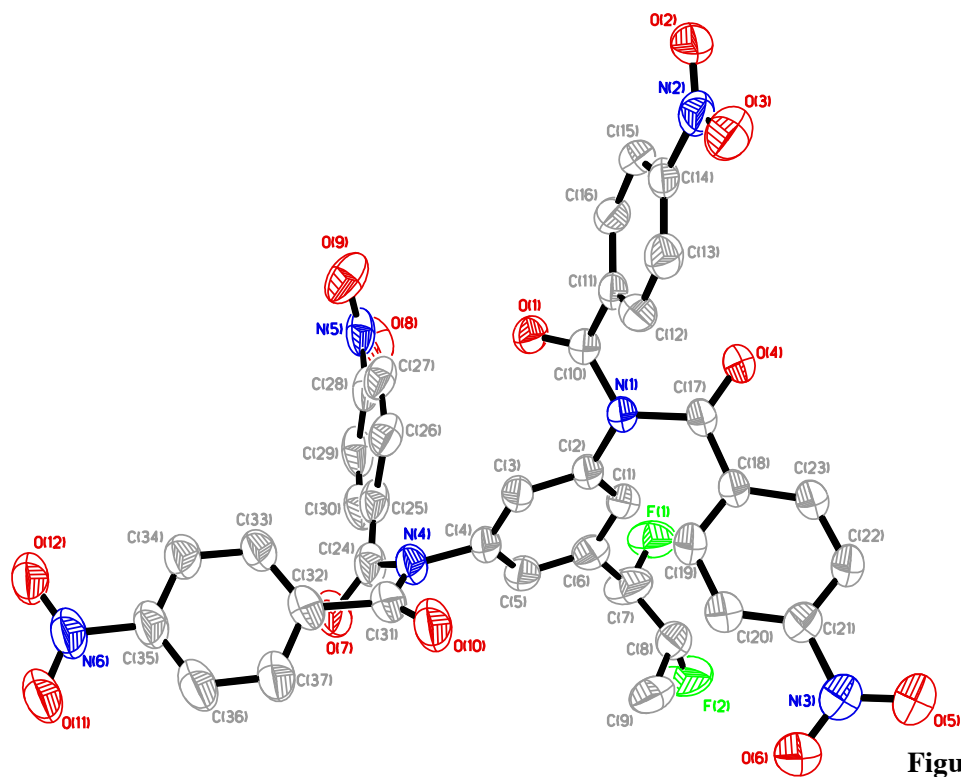

Figure S5.

Perspective views showing 50% probability displacement.

### X-Ray Crystal Structure of 1,2-Difluoride ( $\pm$ )-5l.

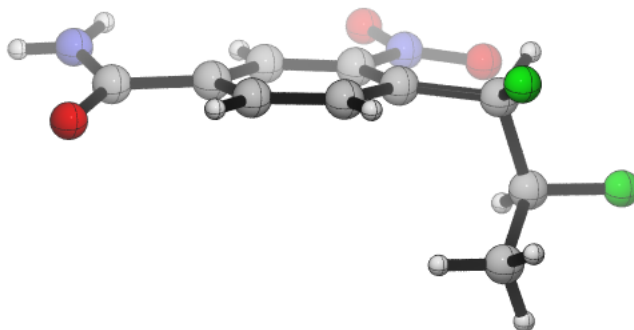

A crystal mounted on a diffractometer was collected data at 100 K. The intensities of the reflections were collected by means of a Bruker APEX II CCD diffractometer ( $\text{MoK}_\alpha$  radiation,  $\lambda=0.71073 \text{ \AA}$ ), and equipped with an Oxford Cryosystems nitrogen flow apparatus. The collection method involved  $0.5^\circ$  scans in  $\omega$  at  $28^\circ$  in  $2\theta$ . Data integration down to  $0.84 \text{ \AA}$  resolution was carried out using SAINT V8.34 C<sup>44</sup> with reflection spot size optimization. Absorption corrections were made with the program SADABS.<sup>44</sup> The structure was solved by the Intrinsic Phasing methods and refined by least-squares methods against  $F^2$  using SHELXT-2014<sup>45</sup> and SHELXL-2014<sup>46</sup> with OLEX 2 interface.<sup>47</sup> Non-hydrogen atoms were refined anisotropically, and hydrogen atoms were allowed to ride on the respective atoms. The Ortep plots produced with SHELXL-2014 program, and the other drawings were produced with Accelrys DS Visualizer 2.0.<sup>48</sup>

**Table S10. Experimental details**

|                             |                                                            |
|-----------------------------|------------------------------------------------------------|
|                             | JWM-VI-159-II                                              |
| Crystal data                |                                                            |
| Chemical formula            | $\text{C}_{10}\text{H}_{10}\text{F}_2\text{N}_2\text{O}_3$ |
| $M_r$                       | 244.20                                                     |
| Crystal system, space group | Monoclinic, $P2_1/c$                                       |
| Temperature (K)             | 100                                                        |
| $a, b, c$ ( $\text{\AA}$ )  | 10.4220 (8), 9.9549 (8), 9.6965 (7)                        |
| $b$ ( $^\circ$ )            | 91.8774 (15)                                               |
| $V$ ( $\text{\AA}^3$ )      | 1005.47 (13)                                               |
| $Z$                         | 4                                                          |
| Radiation type              | Mo $K\alpha$                                               |
| $m$ ( $\text{mm}^{-1}$ )    | 0.14                                                       |
| Crystal size (mm)           | $0.14 \times 0.10 \times 0.08$                             |

|                                                                       |                                                                        |
|-----------------------------------------------------------------------|------------------------------------------------------------------------|
| Data collection                                                       |                                                                        |
| Diffractometer                                                        | Bruker D8 goniometer with CCD area detector diffractometer             |
| Absorption correction                                                 | Multi-scan<br><i>SADABS</i>                                            |
| $T_{\min}, T_{\max}$                                                  | 0.828, 0.862                                                           |
| No. of measured, independent and observed [ $I > 2s(I)$ ] reflections | 17104, 2228, 1727                                                      |
| $R_{\text{int}}$                                                      | 0.041                                                                  |
| $(\sin \theta)_{\text{max}}$ ( $\text{\AA}^{-1}$ )                    | 0.641                                                                  |
| Refinement                                                            |                                                                        |
| $R[F^2 > 2s(F^2)], wR(F^2), S$                                        | 0.033, 0.091, 1.09                                                     |
| No. of reflections                                                    | 2228                                                                   |
| No. of parameters                                                     | 163                                                                    |
| H-atom treatment                                                      | H atoms treated by a mixture of independent and constrained refinement |
| $D\rho_{\text{max}}, D\rho_{\text{min}}$ ( $\text{e \AA}^{-3}$ )      | 0.33, -0.26                                                            |

**Table S11. Geometric parameters ( $\text{\AA}, ^\circ$ )**

|          |             |          |             |
|----------|-------------|----------|-------------|
| C1—C2    | 1.3872 (18) | C7—H7    | 1.0000      |
| C1—C6    | 1.4058 (19) | C8—F2    | 1.4084 (15) |
| C1—N1    | 1.4721 (18) | C8—C9    | 1.505 (2)   |
| C2—C3    | 1.387 (2)   | C8—H8    | 1.0000      |
| C2—H2    | 0.9500      | C9—H9A   | 0.9800      |
| C3—C4    | 1.3877 (19) | C9—H9B   | 0.9800      |
| C3—C10   | 1.5051 (18) | C9—H9C   | 0.9800      |
| C4—C5    | 1.3804 (19) | C10—O3   | 1.2299 (16) |
| C4—H4    | 0.9500      | C10—N2   | 1.3314 (19) |
| C5—C6    | 1.390 (2)   | N1—O2    | 1.2262 (14) |
| C5—H5    | 0.9500      | N1—O1    | 1.2283 (14) |
| C6—C7    | 1.5197 (17) | N2—H2A   | 0.852 (19)  |
| C7—F1    | 1.4024 (15) | N2—H2B   | 0.88 (2)    |
| C7—C8    | 1.5160 (19) |          |             |
| C2—C1—C6 | 122.77 (12) | C6—C7—H7 | 109.6       |
| C2—C1—N1 | 115.36 (12) | F2—C8—C9 | 107.93 (11) |
| C6—C1—N1 | 121.87 (12) | F2—C8—C7 | 107.31 (10) |

|              |              |              |              |
|--------------|--------------|--------------|--------------|
| C1—C2—C3     | 119.16 (12)  | C9—C8—C7     | 114.96 (12)  |
| C1—C2—H2     | 120.4        | F2—C8—H8     | 108.8        |
| C3—C2—H2     | 120.4        | C9—C8—H8     | 108.8        |
| C2—C3—C4     | 119.05 (12)  | C7—C8—H8     | 108.8        |
| C2—C3—C10    | 123.32 (12)  | C8—C9—H9A    | 109.5        |
| C4—C3—C10    | 117.61 (12)  | C8—C9—H9B    | 109.5        |
| C5—C4—C3     | 121.09 (13)  | H9A—C9—H9B   | 109.5        |
| C5—C4—H4     | 119.5        | C8—C9—H9C    | 109.5        |
| C3—C4—H4     | 119.5        | H9A—C9—H9C   | 109.5        |
| C4—C5—C6     | 121.54 (13)  | H9B—C9—H9C   | 109.5        |
| C4—C5—H5     | 119.2        | O3—C10—N2    | 122.80 (13)  |
| C6—C5—H5     | 119.2        | O3—C10—C3    | 119.41 (12)  |
| C5—C6—C1     | 116.32 (12)  | N2—C10—C3    | 117.79 (13)  |
| C5—C6—C7     | 118.20 (12)  | O2—N1—O1     | 122.96 (12)  |
| C1—C6—C7     | 125.41 (12)  | O2—N1—C1     | 118.37 (11)  |
| F1—C7—C8     | 108.38 (11)  | O1—N1—C1     | 118.67 (11)  |
| F1—C7—C6     | 108.33 (11)  | C10—N2—H2A   | 118.3 (12)   |
| C8—C7—C6     | 111.33 (10)  | C10—N2—H2B   | 123.0 (12)   |
| F1—C7—H7     | 109.6        | H2A—N2—H2B   | 118.7 (18)   |
| C8—C7—H7     | 109.6        |              |              |
| C6—C1—C2—C3  | -0.89 (19)   | C5—C6—C7—C8  | 95.33 (14)   |
| N1—C1—C2—C3  | 178.51 (11)  | C1—C6—C7—C8  | -81.25 (16)  |
| C1—C2—C3—C4  | 2.12 (19)    | F1—C7—C8—F2  | -73.70 (13)  |
| C1—C2—C3—C10 | -176.07 (12) | C6—C7—C8—F2  | 167.26 (11)  |
| C2—C3—C4—C5  | -1.0 (2)     | F1—C7—C8—C9  | 46.34 (15)   |
| C10—C3—C4—C5 | 177.34 (12)  | C6—C7—C8—C9  | -72.70 (15)  |
| C3—C4—C5—C6  | -1.6 (2)     | C2—C3—C10—O3 | 162.16 (13)  |
| C4—C5—C6—C1  | 2.72 (19)    | C4—C3—C10—O3 | -16.06 (19)  |
| C4—C5—C6—C7  | -174.17 (12) | C2—C3—C10—N2 | -18.4 (2)    |
| C2—C1—C6—C5  | -1.51 (19)   | C4—C3—C10—N2 | 163.34 (13)  |
| N1—C1—C6—C5  | 179.13 (12)  | C2—C1—N1—O2  | 8.35 (17)    |
| C2—C1—C6—C7  | 175.12 (12)  | C6—C1—N1—O2  | -172.25 (11) |
| N1—C1—C6—C7  | -4.2 (2)     | C2—C1—N1—O1  | -172.22 (11) |
| C5—C6—C7—F1  | -23.75 (16)  | C6—C1—N1—O1  | 7.18 (18)    |
| C1—C6—C7—F1  | 159.67 (12)  |              |              |

**Table S12. Hydrogen-bond geometric parameters (Å, °)**

| <i>D</i> —H... <i>A</i>   | <i>D</i> —H | H... <i>A</i> | <i>D</i> ... <i>A</i> | <i>D</i> —H... <i>A</i> |
|---------------------------|-------------|---------------|-----------------------|-------------------------|
| N2—H2A...O2 <sup>i</sup>  | 0.852 (19)  | 2.298 (19)    | 3.0763 (17)           | 151.9 (16)              |
| N2—H2B...O3 <sup>ii</sup> | 0.88 (2)    | 2.26 (2)      | 3.0189 (17)           | 143.4 (17)              |

Symmetry codes: (i)  $-x+2, y+1/2, -z+1/2$ ; (ii)  $-x+2, y-1/2, -z+1/2$ .

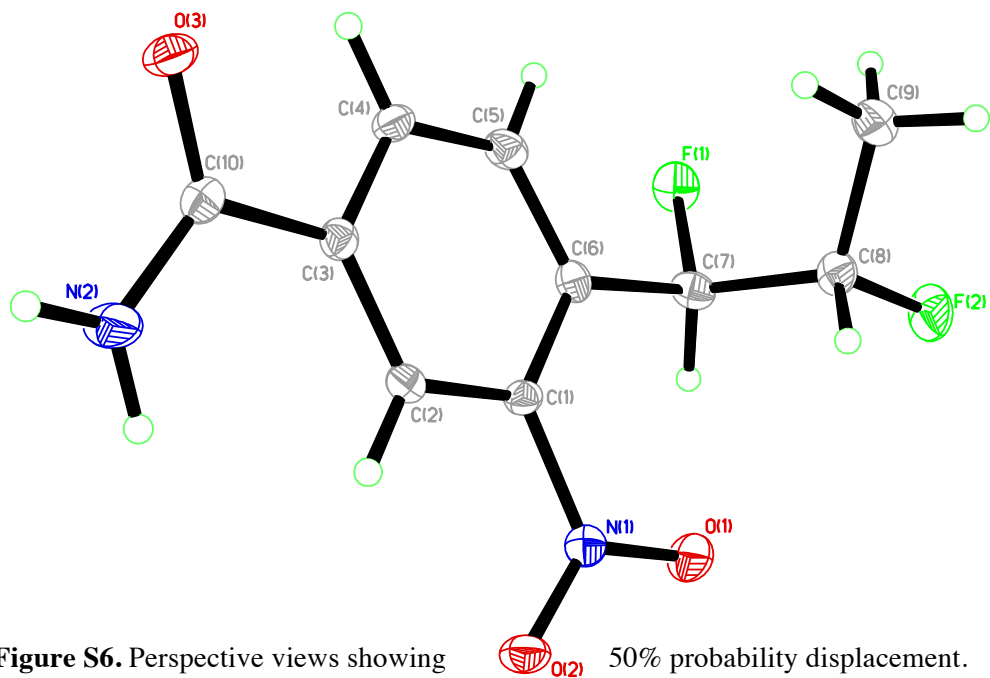



### X-Ray Crystal Structure of 1,2-Difluoride ( $\pm$ )-5m.

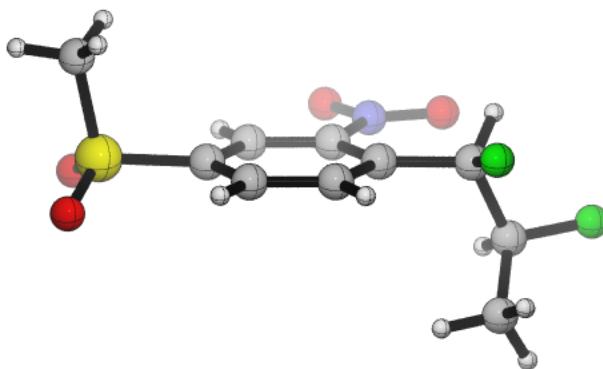

A crystal mounted on a diffractometer was collected data at 100 K. The intensities of the reflections were collected by means of a Bruker APEX II DUO CCD diffractometer (Cu<sub>K</sub> $\alpha$  radiation,  $\lambda=1.54178$  Å), and equipped with an Oxford Cryosystems nitrogen flow apparatus. The collection method involved  $1.0^\circ$  scans in  $\omega$  at  $-30^\circ$ ,  $-55^\circ$ ,  $-80^\circ$ ,  $30^\circ$ ,  $55^\circ$ ,  $80^\circ$  and  $115^\circ$  in  $2\theta$ . Data integration down to  $0.84$  Å resolution was carried out using SAINT V8.34 C<sup>44</sup> with reflection spot size optimization. Absorption corrections were made with the program SADABS.<sup>44</sup> The structure was solved by the Intrinsic Phasing methods and refined by least-squares methods again  $F^2$  using SHELXT-2014<sup>45</sup> and SHELXL-2014<sup>46</sup> with OLEX 2 interface.<sup>47</sup> Non-hydrogen atoms were refined anisotropically, and hydrogen atoms were allowed to ride on the respective atoms. The Ortep plots produced with SHELXL-2014 program, and the other drawings were produced with Accelrys DS Visualizer 2.0.<sup>48</sup>

**Table S13. Experimental details**

|                             |                                                     |
|-----------------------------|-----------------------------------------------------|
|                             | JWM-VI-25-II                                        |
| Crystal data                |                                                     |
| Chemical formula            | C <sub>10</sub> H <sub>11c2</sub> NO <sub>4</sub> S |
| $M_r$                       | 279.26                                              |
| Crystal system, space group | Monoclinic, $P2_1/c$                                |
| Temperature (K)             | 100                                                 |
| $a, b, c$ (Å)               | 5.5641 (3), 5.4741 (3), 38.7991 (19)                |
| $b$ (°)                     | 92.9922 (18)                                        |
| $V$ (Å <sup>3</sup> )       | 1180.15 (11)                                        |
| $Z$                         | 4                                                   |
| Radiation type              | Cu $K\alpha$                                        |
| $m$ (mm <sup>-1</sup> )     | 2.80                                                |
| Crystal size (mm)           | 0.20 $\times$ 0.18 $\times$ 0.06                    |

|                                                                       |                                                            |
|-----------------------------------------------------------------------|------------------------------------------------------------|
| Data collection                                                       |                                                            |
| Diffractometer                                                        | Bruker D8 goniometer with CCD area detector diffractometer |
| Absorption correction                                                 | Multi-scan<br><i>SADABS</i>                                |
| $T_{\min}, T_{\max}$                                                  | 0.717, 0.864                                               |
| No. of measured, independent and observed [ $I > 2s(I)$ ] reflections | 22755, 2128, 2086                                          |
| $R_{\text{int}}$                                                      | 0.057                                                      |
| $(\sin \theta/\lambda)_{\text{max}}$ ( $\text{\AA}^{-1}$ )            | 0.595                                                      |
| Refinement                                                            |                                                            |
| $R[F^2 > 2s(F^2)], wR(F^2), S$                                        | 0.054, 0.134, 1.08                                         |
| No. of reflections                                                    | 2128                                                       |
| No. of parameters                                                     | 166                                                        |
| H-atom treatment                                                      | H-atom parameters constrained                              |
| $D\rho_{\text{max}}, D\rho_{\text{min}}$ ( $\text{e \AA}^{-3}$ )      | 0.33, -0.32                                                |

**Table S14. Geometric parameters ( $\text{\AA}, ^\circ$ )**

|          |           |          |           |
|----------|-----------|----------|-----------|
| C1—C2    | 1.384 (6) | C8—F2    | 1.405 (4) |
| C1—C6    | 1.403 (6) | C8—C9    | 1.497 (6) |
| C1—N1    | 1.478 (5) | C8—H8    | 1.0000    |
| C2—C3    | 1.383 (6) | C9—H9A   | 0.9800    |
| C2—H2    | 0.9500    | C9—H9B   | 0.9800    |
| C3—C4    | 1.391 (6) | C9—H9C   | 0.9800    |
| C3—S1    | 1.772 (4) | C10—S1   | 1.748 (4) |
| C4—C5    | 1.392 (6) | C10—H10A | 0.9800    |
| C4—H4    | 0.9500    | C10—H10B | 0.9800    |
| C5—C6    | 1.399 (6) | C10—H10C | 0.9800    |
| C5—H5    | 0.9500    | N1—O4    | 1.226 (5) |
| C6—C7    | 1.525 (5) | N1—O3    | 1.231 (4) |
| C7—F1    | 1.402 (4) | O1—S1    | 1.437 (3) |
| C7—C8    | 1.528 (6) | O2—S1    | 1.445 (3) |
| C7—H7    | 1.0000    |          |           |
| C2—C1—C6 | 122.9 (4) | C9—C8—C7 | 114.4 (4) |
| C2—C1—N1 | 114.9 (3) | F2—C8—H8 | 109.1     |
| C6—C1—N1 | 122.2 (3) | C9—C8—H8 | 109.1     |

|             |            |               |             |
|-------------|------------|---------------|-------------|
| C3—C2—C1    | 118.8 (4)  | C7—C8—H8      | 109.1       |
| C3—C2—H2    | 120.6      | C8—C9—H9A     | 109.5       |
| C1—C2—H2    | 120.6      | C8—C9—H9B     | 109.5       |
| C2—C3—C4    | 120.7 (4)  | H9A—C9—H9B    | 109.5       |
| C2—C3—S1    | 119.1 (3)  | C8—C9—H9C     | 109.5       |
| C4—C3—S1    | 120.2 (3)  | H9A—C9—H9C    | 109.5       |
| C3—C4—C5    | 119.3 (4)  | H9B—C9—H9C    | 109.5       |
| C3—C4—H4    | 120.4      | S1—C10—H10A   | 109.5       |
| C5—C4—H4    | 120.4      | S1—C10—H10B   | 109.5       |
| C4—C5—C6    | 122.0 (4)  | H10A—C10—H10B | 109.5       |
| C4—C5—H5    | 119.0      | S1—C10—H10C   | 109.5       |
| C6—C5—H5    | 119.0      | H10A—C10—H10C | 109.5       |
| C5—C6—C1    | 116.3 (4)  | H10B—C10—H10C | 109.5       |
| C5—C6—C7    | 118.2 (4)  | O4—N1—O3      | 123.1 (4)   |
| C1—C6—C7    | 125.5 (4)  | O4—N1—C1      | 118.1 (3)   |
| F1—C7—C6    | 107.5 (3)  | O3—N1—C1      | 118.8 (3)   |
| F1—C7—C8    | 108.0 (3)  | O1—S1—O2      | 118.05 (19) |
| C6—C7—C8    | 113.0 (3)  | O1—S1—C10     | 109.01 (19) |
| F1—C7—H7    | 109.4      | O2—S1—C10     | 109.42 (18) |
| C6—C7—H7    | 109.4      | O1—S1—C3      | 107.73 (18) |
| C8—C7—H7    | 109.4      | O2—S1—C3      | 108.15 (17) |
| F2—C8—C9    | 109.1 (3)  | C10—S1—C3     | 103.47 (19) |
| F2—C8—C7    | 105.9 (3)  |               |             |
| C6—C1—C2—C3 | 0.4 (6)    | C1—C6—C7—C8   | -78.3 (5)   |
| N1—C1—C2—C3 | -177.7 (3) | F1—C7—C8—F2   | -74.4 (4)   |
| C1—C2—C3—C4 | -0.2 (6)   | C6—C7—C8—F2   | 166.8 (3)   |
| C1—C2—C3—S1 | 177.3 (3)  | F1—C7—C8—C9   | 45.7 (5)    |
| C2—C3—C4—C5 | -0.2 (6)   | C6—C7—C8—C9   | -73.1 (5)   |
| S1—C3—C4—C5 | -177.8 (3) | C2—C1—N1—O4   | -2.8 (5)    |
| C3—C4—C5—C6 | 0.5 (6)    | C6—C1—N1—O4   | 179.1 (3)   |
| C4—C5—C6—C1 | -0.4 (6)   | C2—C1—N1—O3   | 176.7 (3)   |
| C4—C5—C6—C7 | 179.4 (4)  | C6—C1—N1—O3   | -1.5 (6)    |
| C2—C1—C6—C5 | -0.1 (6)   | C2—C3—S1—O1   | 26.1 (4)    |
| N1—C1—C6—C5 | 177.8 (3)  | C4—C3—S1—O1   | -156.3 (3)  |
| C2—C1—C6—C7 | -179.9 (4) | C2—C3—S1—O2   | 154.8 (3)   |
| N1—C1—C6—C7 | -2.0 (6)   | C4—C3—S1—O2   | -27.7 (4)   |
| C5—C6—C7—F1 | -17.2 (5)  | C2—C3—S1—C10  | -89.2 (3)   |
| C1—C6—C7—F1 | 162.6 (3)  | C4—C3—S1—C10  | 88.3 (3)    |
| C5—C6—C7—C8 | 101.9 (4)  |               |             |

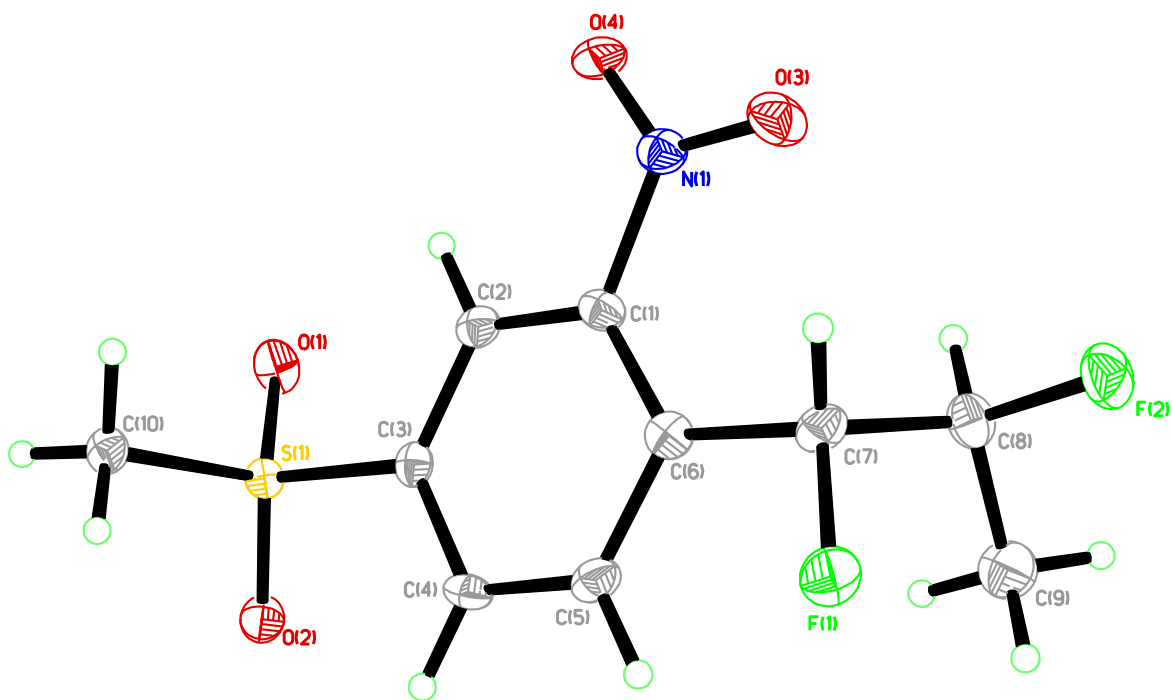

**Figure S7.** Perspective views showing 50% probability displacement.

### X-Ray Crystal Structure of 1,2-Difluoride ( $\pm$ )-5s.

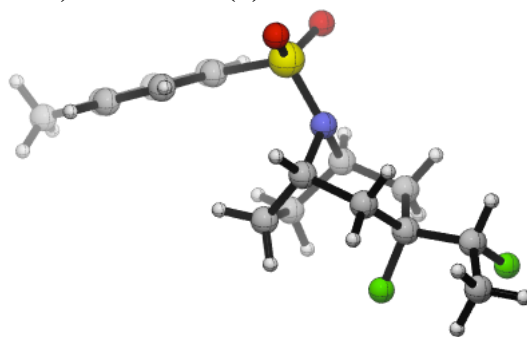

A crystal mounted on a diffractometer was collected data at 100 K. The intensities of the reflections were collected by means of a Bruker APEX II CCD diffractometer ( $\text{MoK}_\alpha$  radiation,  $\lambda=0.71073 \text{ \AA}$ ), and equipped with an Oxford Cryosystems nitrogen flow apparatus. The collection method involved  $0.5^\circ$  scans in  $\omega$  at  $28^\circ$  in  $2\theta$ . Data integration down to  $0.78 \text{ \AA}$  resolution was carried out using SAINT V8.34 C<sup>44</sup> with reflection spot size optimization. Absorption corrections were made with the program SADABS.<sup>44</sup> The structure was solved by the Intrinsic Phasing methods and refined by least-squares methods again  $F^2$  using SHELXT-2014<sup>45</sup> and SHELXL-2014<sup>46</sup> with OLEX 2 interface.<sup>47</sup> Non-hydrogen atoms were refined anisotropically, and hydrogen atoms were allowed to ride on the respective atoms. The Ortep plots produced with SHELXL-2014 program, and the other drawings were produced with Accelrys DS Visualizer 2.0.<sup>48</sup>

**Table S15. Experimental details**

|                                      |                                                           |
|--------------------------------------|-----------------------------------------------------------|
|                                      | SMB-trisub-OTS                                            |
| Crystal data                         |                                                           |
| Chemical formula                     | $\text{C}_{16}\text{H}_{21}\text{c}_2\text{NO}_2\text{S}$ |
| $M_r$                                | 329.40                                                    |
| Crystal system, space group          | Triclinic, $P-1$                                          |
| Temperature (K)                      | 100                                                       |
| $a, b, c$ ( $\text{\AA}$ )           | 6.1242 (2), 10.9040 (3), 12.8468 (4)                      |
| $\alpha, \beta, \gamma$ ( $^\circ$ ) | 109.6287 (6), 101.8115 (6), 91.5446 (6)                   |
| $V$ ( $\text{\AA}^3$ )               | 786.65 (4)                                                |
| $Z$                                  | 2                                                         |
| Radiation type                       | Mo $K\alpha$                                              |
| $\mu$ ( $\text{mm}^{-1}$ )           | 0.23                                                      |
| Crystal size (mm)                    | $0.24 \times 0.18 \times 0.10$                            |
| Data collection                      |                                                           |

|                                                                       |                                                            |
|-----------------------------------------------------------------------|------------------------------------------------------------|
| Diffractometer                                                        | Bruker D8 goniometer with CCD area detector diffractometer |
| Absorption correction                                                 | Multi-scan<br><i>SADABS</i>                                |
| $T_{\min}, T_{\max}$                                                  | 0.725, 0.746                                               |
| No. of measured, independent and observed [ $I > 2s(I)$ ] reflections | 58823, 3479, 3141                                          |
| $R_{\text{int}}$                                                      | 0.048                                                      |
| $(\sin \theta/\lambda)_{\text{max}}$ ( $\text{\AA}^{-1}$ )            | 0.642                                                      |
| Refinement                                                            |                                                            |
| $R[F^2 > 2s(F^2)], wR(F^2), S$                                        | 0.031, 0.086, 1.06                                         |
| No. of reflections                                                    | 3479                                                       |
| No. of parameters                                                     | 201                                                        |
| H-atom treatment                                                      | H-atom parameters constrained                              |
| $D\rho_{\text{max}}, D\rho_{\text{min}}$ ( $\text{e \AA}^{-3}$ )      | 0.38, -0.40                                                |

**Table S16. Geometric parameters ( $\text{\AA}$ ,  $^\circ$ )**

|        |             |          |             |
|--------|-------------|----------|-------------|
| C1—C2  | 1.5283 (18) | C8—H8    | 1.0000      |
| C1—C7  | 1.5291 (18) | C9—H9A   | 0.9800      |
| C1—H1A | 0.9900      | C9—H9B   | 0.9800      |
| C1—H1B | 0.9900      | C9—H9C   | 0.9800      |
| C2—N1  | 1.4830 (14) | C10—C11  | 1.386 (2)   |
| C2—C3  | 1.5432 (17) | C10—C15  | 1.394 (2)   |
| C2—H2  | 1.0000      | C10—H10  | 0.9500      |
| C3—C4  | 1.5472 (17) | C11—C12  | 1.3926 (19) |
| C3—H3A | 0.9900      | C11—H11  | 0.9500      |
| C3—H3B | 0.9900      | C12—C13  | 1.3933 (18) |
| C4—C5  | 1.5417 (17) | C12—S1   | 1.7605 (13) |
| C4—H4A | 0.9900      | C13—C14  | 1.385 (2)   |
| C4—H4B | 0.9900      | C13—H13  | 0.9500      |
| C5—N1  | 1.4854 (15) | C14—C15  | 1.392 (2)   |
| C5—C6  | 1.5315 (18) | C14—H14  | 0.9500      |
| C5—H5  | 1.0000      | C15—C16  | 1.506 (2)   |
| C6—C7  | 1.5321 (17) | C16—H16A | 0.9800      |
| C6—H6A | 0.9900      | C16—H16B | 0.9800      |
| C6—H6B | 0.9900      | C16—H16C | 0.9800      |
| C7—F1  | 1.4241 (13) | N1—S1    | 1.6240 (11) |
| C7—C8  | 1.5205 (19) | O1—S1    | 1.4378 (9)  |

|            |             |               |             |
|------------|-------------|---------------|-------------|
| C8—F2      | 1.4164 (15) | O2—S1         | 1.4356 (9)  |
| C8—C9      | 1.505 (2)   |               |             |
| C2—C1—C7   | 113.06 (10) | C9—C8—C7      | 114.93 (12) |
| C2—C1—H1A  | 109.0       | F2—C8—H8      | 108.6       |
| C7—C1—H1A  | 109.0       | C9—C8—H8      | 108.6       |
| C2—C1—H1B  | 109.0       | C7—C8—H8      | 108.6       |
| C7—C1—H1B  | 109.0       | C8—C9—H9A     | 109.5       |
| H1A—C1—H1B | 107.8       | C8—C9—H9B     | 109.5       |
| N1—C2—C1   | 105.55 (10) | H9A—C9—H9B    | 109.5       |
| N1—C2—C3   | 104.08 (9)  | C8—C9—H9C     | 109.5       |
| C1—C2—C3   | 113.52 (10) | H9A—C9—H9C    | 109.5       |
| N1—C2—H2   | 111.1       | H9B—C9—H9C    | 109.5       |
| C1—C2—H2   | 111.1       | C11—C10—C15   | 121.67 (14) |
| C3—C2—H2   | 111.1       | C11—C10—H10   | 119.2       |
| C2—C3—C4   | 104.45 (9)  | C15—C10—H10   | 119.2       |
| C2—C3—H3A  | 110.9       | C10—C11—C12   | 118.75 (13) |
| C4—C3—H3A  | 110.9       | C10—C11—H11   | 120.6       |
| C2—C3—H3B  | 110.9       | C12—C11—H11   | 120.6       |
| C4—C3—H3B  | 110.9       | C11—C12—C13   | 120.51 (13) |
| H3A—C3—H3B | 108.9       | C11—C12—S1    | 119.92 (10) |
| C5—C4—C3   | 104.87 (10) | C13—C12—S1    | 119.51 (10) |
| C5—C4—H4A  | 110.8       | C14—C13—C12   | 119.75 (13) |
| C3—C4—H4A  | 110.8       | C14—C13—H13   | 120.1       |
| C5—C4—H4B  | 110.8       | C12—C13—H13   | 120.1       |
| C3—C4—H4B  | 110.8       | C13—C14—C15   | 120.75 (14) |
| H4A—C4—H4B | 108.8       | C13—C14—H14   | 119.6       |
| N1—C5—C6   | 105.12 (10) | C15—C14—H14   | 119.6       |
| N1—C5—C4   | 104.10 (9)  | C14—C15—C10   | 118.55 (13) |
| C6—C5—C4   | 113.09 (10) | C14—C15—C16   | 120.46 (15) |
| N1—C5—H5   | 111.4       | C10—C15—C16   | 120.98 (16) |
| C6—C5—H5   | 111.4       | C15—C16—H16A  | 109.5       |
| C4—C5—H5   | 111.4       | C15—C16—H16B  | 109.5       |
| C5—C6—C7   | 113.06 (10) | H16A—C16—H16B | 109.5       |
| C5—C6—H6A  | 109.0       | C15—C16—H16C  | 109.5       |
| C7—C6—H6A  | 109.0       | H16A—C16—H16C | 109.5       |
| C5—C6—H6B  | 109.0       | H16B—C16—H16C | 109.5       |
| C7—C6—H6B  | 109.0       | C2—N1—C5      | 103.31 (9)  |
| H6A—C6—H6B | 107.8       | C2—N1—S1      | 120.90 (8)  |
| F1—C7—C8   | 106.47 (10) | C5—N1—S1      | 121.50 (8)  |
| F1—C7—C1   | 107.22 (10) | O2—S1—O1      | 119.88 (6)  |
| C8—C7—C1   | 111.51 (11) | O2—S1—N1      | 106.03 (5)  |
| F1—C7—C6   | 107.85 (10) | O1—S1—N1      | 106.29 (5)  |

|                 |              |                 |              |
|-----------------|--------------|-----------------|--------------|
| C8—C7—C6        | 110.52 (10)  | O2—S1—C12       | 107.73 (6)   |
| C1—C7—C6        | 112.93 (10)  | O1—S1—C12       | 107.16 (6)   |
| F2—C8—C9        | 108.68 (11)  | N1—S1—C12       | 109.48 (6)   |
| F2—C8—C7        | 107.21 (10)  |                 |              |
| C7—C1—C2—N1     | 57.19 (12)   | C12—C13—C14—C15 | 0.1 (2)      |
| C7—C1—C2—C3     | -56.17 (13)  | C13—C14—C15—C10 | 0.7 (2)      |
| N1—C2—C3—C4     | -26.42 (13)  | C13—C14—C15—C16 | -179.32 (13) |
| C1—C2—C3—C4     | 87.81 (12)   | C11—C10—C15—C14 | -0.8 (2)     |
| C2—C3—C4—C5     | 0.92 (13)    | C11—C10—C15—C16 | 179.25 (14)  |
| C3—C4—C5—N1     | 24.84 (13)   | C1—C2—N1—C5     | -77.03 (11)  |
| C3—C4—C5—C6     | -88.69 (12)  | C3—C2—N1—C5     | 42.75 (12)   |
| N1—C5—C6—C7     | -57.48 (12)  | C1—C2—N1—S1     | 142.85 (9)   |
| C4—C5—C6—C7     | 55.44 (14)   | C3—C2—N1—S1     | -97.36 (11)  |
| C2—C1—C7—F1     | 80.62 (12)   | C6—C5—N1—C2     | 77.02 (11)   |
| C2—C1—C7—C8     | -163.20 (10) | C4—C5—N1—C2     | -42.10 (12)  |
| C2—C1—C7—C6     | -38.04 (14)  | C6—C5—N1—S1     | -143.17 (9)  |
| C5—C6—C7—F1     | -79.98 (12)  | C4—C5—N1—S1     | 97.70 (10)   |
| C5—C6—C7—C8     | 164.01 (10)  | C2—N1—S1—O2     | -179.52 (9)  |
| C5—C6—C7—C1     | 38.32 (14)   | C5—N1—S1—O2     | 47.53 (10)   |
| F1—C7—C8—F2     | 63.21 (12)   | C2—N1—S1—O1     | -50.91 (10)  |
| C1—C7—C8—F2     | -53.43 (13)  | C5—N1—S1—O1     | 176.14 (9)   |
| C6—C7—C8—F2     | -179.92 (10) | C2—N1—S1—C12    | 64.52 (10)   |
| F1—C7—C8—C9     | -57.71 (13)  | C5—N1—S1—C12    | -68.43 (10)  |
| C1—C7—C8—C9     | -174.35 (10) | C11—C12—S1—O2   | -27.12 (12)  |
| C6—C7—C8—C9     | 59.16 (14)   | C13—C12—S1—O2   | 155.68 (10)  |
| C15—C10—C11—C12 | 0.0 (2)      | C11—C12—S1—O1   | -157.37 (10) |
| C10—C11—C12—C13 | 0.8 (2)      | C13—C12—S1—O1   | 25.43 (12)   |
| C10—C11—C12—S1  | -176.36 (10) | C11—C12—S1—N1   | 87.75 (11)   |
| C11—C12—C13—C14 | -0.9 (2)     | C13—C12—S1—N1   | -89.44 (11)  |
| S1—C12—C13—C14  | 176.30 (10)  |                 |              |



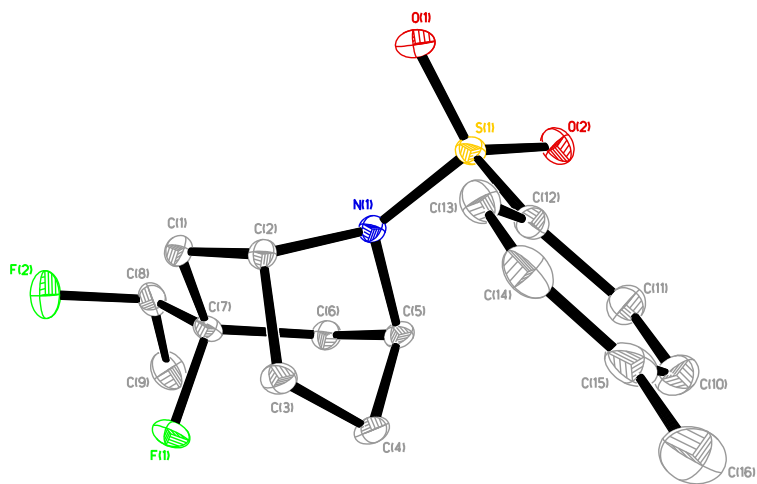

**Figure S8.** Perspective views showing 50% probability displacement.

### X-Ray Crystal Structure of 1,2-Difluoride ( $\pm$ )-7a.

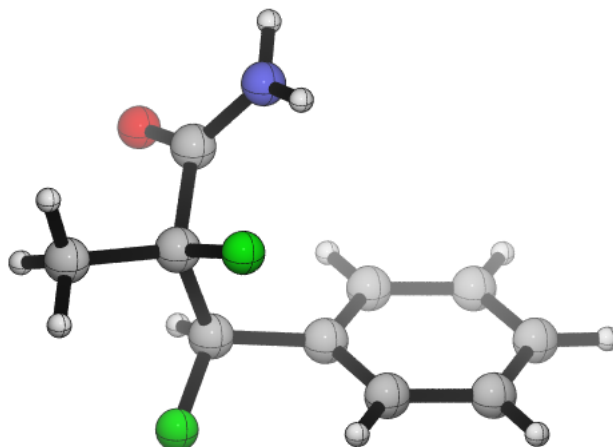

A crystal mounted on a diffractometer was collected data at 100 K. The intensities of the reflections were collected by means of a Bruker APEX II CCD along with the D8 Diffractometer (30 KeV,  $\lambda = 0.40651 \text{ \AA}$ ), and equipped with an Oxford Cryosystems nitrogen open flow apparatus. The collection method involved  $0.5^\circ$  scans in  $\Phi$  at  $-5^\circ$  in  $2\theta$ . Data integration down to  $0.84 \text{ \AA}$  resolution was carried out using SAINT V8.34 C<sup>44</sup> with reflection spot size optimization. Absorption corrections were made with the program SADABS.<sup>44</sup> The structure was solved by the Intrinsic Phasing methods and refined by least-squares methods against  $F^2$  using SHELXT-2014<sup>45</sup> and SHELXL-2014<sup>46</sup> with OLEX 2 interface.<sup>47</sup> Non-hydrogen atoms were refined anisotropically, and hydrogen atoms were allowed to ride on the respective atoms. The Ortep plots produced with SHELXL-2014 program, and the other drawings were produced with Accelrys DS Visualizer 2.0.<sup>48</sup>

**Table S17. Experimental details**

|                             |                                                 |
|-----------------------------|-------------------------------------------------|
|                             | JWM-V-194-II                                    |
| Crystal data                |                                                 |
| Chemical formula            | $\text{C}_{10}\text{H}_{11}\text{c}_2\text{NO}$ |
| $M_r$                       | 199.20                                          |
| Crystal system, space group | Monoclinic, $P2_1/c$                            |
| Temperature (K)             | 100                                             |
| $a, b, c$ ( $\text{\AA}$ )  | 7.9650 (11), 5.1021 (7), 22.815 (3)             |
| $\beta$ ( $^\circ$ )        | 96.225 (1)                                      |
| $V$ ( $\text{\AA}^3$ )      | 921.7 (2)                                       |

|                                                                            |                                                                        |
|----------------------------------------------------------------------------|------------------------------------------------------------------------|
| Z                                                                          | 4                                                                      |
| Radiation type                                                             | Synchrotron, $\lambda = 0.40651 \text{ \AA}$                           |
| $\mu$ ( $\text{mm}^{-1}$ )                                                 | 0.02                                                                   |
| Crystal size (mm)                                                          | $0.08 \times 0.01 \times 0.01$                                         |
| Data collection                                                            |                                                                        |
| Diffractometer                                                             | Three-circle goniometer with fixed chi diffractometer                  |
| Absorption correction                                                      | Multi-scan<br><i>SADABS</i>                                            |
| $T_{\min}, T_{\max}$                                                       | 0.745, 0.762                                                           |
| No. of measured, independent and observed [ $I > 2\sigma(I)$ ] reflections | 6597, 1568, 1379                                                       |
| $R_{\text{int}}$                                                           | 0.045                                                                  |
| $(\sin \theta/\lambda)_{\text{max}}$ ( $\text{\AA}^{-1}$ )                 | 0.595                                                                  |
| Refinement                                                                 |                                                                        |
| $R[F^2 > 2\sigma(F^2)], wR(F^2), S$                                        | 0.041, 0.097, 1.12                                                     |
| No. of reflections                                                         | 1568                                                                   |
| No. of parameters                                                          | 136                                                                    |
| H-atom treatment                                                           | H atoms treated by a mixture of independent and constrained refinement |
| $D\rho_{\text{max}}, D\rho_{\text{min}}$ ( $\text{e \AA}^{-3}$ )           | 0.23, -0.21                                                            |

**Table S18. Geometric parameters ( $\text{\AA}, ^\circ$ )**

|       |           |          |           |
|-------|-----------|----------|-----------|
| C1—C6 | 1.377 (3) | C7—C8    | 1.530 (3) |
| C1—C2 | 1.382 (3) | C7—H7    | 1.0000    |
| C1—H1 | 0.9500    | C8—F2    | 1.401 (2) |
| C2—C3 | 1.369 (3) | C8—C10   | 1.504 (3) |
| C2—H2 | 0.9500    | C8—C9    | 1.518 (3) |
| C3—C4 | 1.372 (3) | C9—O1    | 1.238 (2) |
| C3—H3 | 0.9500    | C9—N1    | 1.310 (2) |
| C4—C5 | 1.390 (3) | C10—H10A | 0.9800    |
| C4—H4 | 0.9500    | C10—H10B | 0.9800    |
| C5—C6 | 1.377 (3) | C10—H10C | 0.9800    |
| C5—H5 | 0.9500    | N1—H1A   | 0.92 (2)  |
| C6—C7 | 1.501 (3) | N1—H1B   | 0.87 (3)  |
| C7—F1 | 1.387 (2) |          |           |

|             |              |               |              |
|-------------|--------------|---------------|--------------|
| C6—C1—C2    | 120.2 (2)    | F1—C7—H7      | 108.9        |
| C6—C1—H1    | 119.9        | C6—C7—H7      | 108.9        |
| C2—C1—H1    | 119.9        | C8—C7—H7      | 108.9        |
| C3—C2—C1    | 120.1 (2)    | F2—C8—C10     | 107.61 (15)  |
| C3—C2—H2    | 119.9        | F2—C8—C9      | 108.26 (14)  |
| C1—C2—H2    | 119.9        | C10—C8—C9     | 110.56 (16)  |
| C2—C3—C4    | 120.2 (2)    | F2—C8—C7      | 107.74 (15)  |
| C2—C3—H3    | 119.9        | C10—C8—C7     | 113.44 (16)  |
| C4—C3—H3    | 119.9        | C9—C8—C7      | 109.07 (15)  |
| C3—C4—C5    | 119.9 (2)    | O1—C9—N1      | 124.35 (18)  |
| C3—C4—H4    | 120.0        | O1—C9—C8      | 118.34 (16)  |
| C5—C4—H4    | 120.0        | N1—C9—C8      | 117.30 (16)  |
| C6—C5—C4    | 119.9 (2)    | C8—C10—H10A   | 109.5        |
| C6—C5—H5    | 120.0        | C8—C10—H10B   | 109.5        |
| C4—C5—H5    | 120.0        | H10A—C10—H10B | 109.5        |
| C1—C6—C5    | 119.65 (18)  | C8—C10—H10C   | 109.5        |
| C1—C6—C7    | 120.33 (18)  | H10A—C10—H10C | 109.5        |
| C5—C6—C7    | 119.99 (18)  | H10B—C10—H10C | 109.5        |
| F1—C7—C6    | 109.25 (15)  | C9—N1—H1A     | 121.1 (13)   |
| F1—C7—C8    | 107.86 (15)  | C9—N1—H1B     | 119.4 (15)   |
| C6—C7—C8    | 112.82 (15)  | H1A—N1—H1B    | 119 (2)      |
| C6—C1—C2—C3 | 0.3 (3)      | F1—C7—C8—F2   | 74.85 (17)   |
| C1—C2—C3—C4 | -1.8 (3)     | C6—C7—C8—F2   | -45.9 (2)    |
| C2—C3—C4—C5 | 1.8 (3)      | F1—C7—C8—C10  | -44.2 (2)    |
| C3—C4—C5—C6 | -0.3 (3)     | C6—C7—C8—C10  | -164.91 (16) |
| C2—C1—C6—C5 | 1.2 (3)      | F1—C7—C8—C9   | -167.86 (14) |
| C2—C1—C6—C7 | -176.75 (17) | C6—C7—C8—C9   | 71.4 (2)     |
| C4—C5—C6—C1 | -1.2 (3)     | F2—C8—C9—O1   | -175.96 (15) |
| C4—C5—C6—C7 | 176.77 (18)  | C10—C8—C9—O1  | -58.3 (2)    |
| C1—C6—C7—F1 | -34.4 (2)    | C7—C8—C9—O1   | 67.1 (2)     |
| C5—C6—C7—F1 | 147.66 (17)  | F2—C8—C9—N1   | 3.3 (2)      |
| C1—C6—C7—C8 | 85.6 (2)     | C10—C8—C9—N1  | 120.93 (18)  |
| C5—C6—C7—C8 | -92.4 (2)    | C7—C8—C9—N1   | -113.67 (18) |

**Table S19. Hydrogen-bond geometry (Å, °)**

| <i>D</i> —H $\cdots$ <i>A</i>   | <i>D</i> —H | H $\cdots$ <i>A</i> | <i>D</i> $\cdots$ <i>A</i> | <i>D</i> —H $\cdots$ <i>A</i> |
|---------------------------------|-------------|---------------------|----------------------------|-------------------------------|
| N1—H1B $\cdots$ O1 <sup>i</sup> | 0.87 (3)    | 2.06 (3)            | 2.908 (2)                  | 164 (2)                       |

Symmetry code: (i)  $-x, y-1/2, -z+3/2$ .

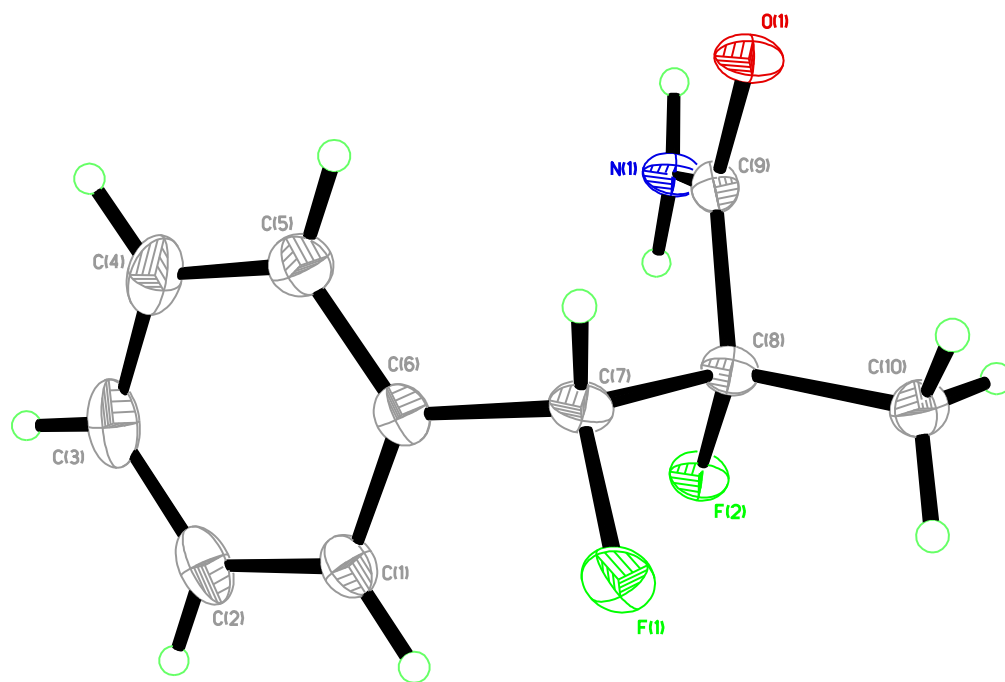

**Figure S9.** Perspective views showing 50% probability displacement.

### X-Ray Crystal Structure of 1,2-Difluoride ( $\pm$ )-7c.

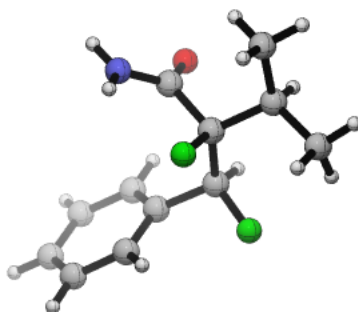

A crystal mounted on a diffractometer was collected data at 100 K. The intensities of the reflections were collected by means of a Bruker APEX II DUO CCD diffractometer ( $\text{Cu}_{K\alpha}$  radiation,  $\lambda=1.54178 \text{ \AA}$ ), and equipped with an Oxford Cryosystems nitrogen flow apparatus. The collection method involved  $1.0^\circ$  scans in  $\omega$  at  $-30^\circ$ ,  $-55^\circ$ ,  $-80^\circ$ ,  $30^\circ$ ,  $55^\circ$ ,  $80^\circ$  and  $115^\circ$  in  $2\theta$ . Data integration down to  $0.84 \text{ \AA}$  resolution was carried out using SAINT V8.34 C<sup>44</sup> with reflection spot size optimization. Absorption corrections were made with the program SADABS.<sup>44</sup> The structure was solved by the Intrinsic Phasing methods and refined by least-squares methods against  $F^2$  using SHELXT-2014<sup>45</sup> and SHELXL-2014<sup>46</sup> with OLEX 2 interface.<sup>47</sup> Non-hydrogen atoms were refined anisotropically, and hydrogen atoms were allowed to ride on the respective atoms. The Ortep plots produced with SHELXL-2014 program, and the other drawings were produced with Accelrys DS Visualizer 2.0.<sup>48</sup>

**Table S20. Experimental details**

|                             |                                                            |
|-----------------------------|------------------------------------------------------------|
|                             | JWM-V-223-II                                               |
| Crystal data                |                                                            |
| Chemical formula            | $\text{C}_{24}\text{H}_{30}\text{F}_4\text{N}_2\text{O}_2$ |
| $M_r$                       | 454.50                                                     |
| Crystal system, space group | Monoclinic, $P2_1/c$                                       |
| Temperature (K)             | 100                                                        |
| $a, b, c$ ( $\text{\AA}$ )  | 5.1700 (5), 35.663 (4), 13.1106 (15)                       |
| $b$ ( $^\circ$ )            | 100.433 (9)                                                |
| $V$ ( $\text{\AA}^3$ )      | 2377.3 (4)                                                 |
| $Z$                         | 4                                                          |
| Radiation type              | $\text{Cu } K\alpha$                                       |
| $m$ ( $\text{mm}^{-1}$ )    | 0.86                                                       |
| Crystal size (mm)           | $0.18 \times 0.01 \times 0.01$                             |
| Data collection             |                                                            |

|                                                                       |                                                            |
|-----------------------------------------------------------------------|------------------------------------------------------------|
| Diffractometer                                                        | Bruker D8 goniometer with CCD area detector diffractometer |
| Absorption correction                                                 | Multi-scan<br><i>SADABS</i>                                |
| $T_{\min}, T_{\max}$                                                  | 0.656, 0.753                                               |
| No. of measured, independent and observed [ $I > 2s(I)$ ] reflections | 23289, 4062, 1798                                          |
| $R_{\text{int}}$                                                      | 0.176                                                      |
| $(\sin \theta/\lambda)_{\text{max}}$ ( $\text{\AA}^{-1}$ )            | 0.595                                                      |
| Refinement                                                            |                                                            |
| $R[F^2 > 2s(F^2)], wR(F^2), S$                                        | 0.105, 0.257, 1.10                                         |
| No. of reflections                                                    | 4062                                                       |
| No. of parameters                                                     | 306                                                        |
| No. of restraints                                                     | 6                                                          |
| H-atom treatment                                                      | H-atom parameters constrained                              |
| $D\rho_{\text{max}}, D\rho_{\text{min}}$ ( $e \text{\AA}^{-3}$ )      | 0.39, -0.35                                                |

**Table S21. Geometric parameters ( $\text{\AA}, ^\circ$ )**

|         |             |           |            |
|---------|-------------|-----------|------------|
| C1—C2   | 1.377 (10)  | C26—C27   | 1.506 (17) |
| C1—C6   | 1.385 (9)   | C27—F3    | 1.426 (18) |
| C2—C3   | 1.374 (12)  | C27—C28   | 1.515 (18) |
| C3—C4   | 1.376 (12)  | C21A—C22A | 1.3900     |
| C4—C5   | 1.374 (10)  | C21A—C26A | 1.3900     |
| C5—C6   | 1.346 (8)   | C22A—C23A | 1.3900     |
| C6—C7   | 1.502 (8)   | C23A—C24A | 1.3900     |
| C7—F1   | 1.378 (7)   | C24A—C25A | 1.3900     |
| C7—C8   | 1.538 (9)   | C25A—C26A | 1.3900     |
| C8—F2   | 1.399 (6)   | C26A—C27A | 1.507 (10) |
| C8—C9   | 1.525 (8)   | C27A—F3A  | 1.424 (10) |
| C8—C10  | 1.547 (8)   | C27A—C28  | 1.517 (11) |
| C9—O1   | 1.226 (6)   | C28—F4    | 1.403 (7)  |
| C9—N1   | 1.314 (7)   | C28—C29   | 1.525 (8)  |
| C10—C11 | 1.512 (9)   | C28—C30   | 1.538 (9)  |
| C10—C12 | 1.521 (9)   | C28—C30A  | 1.563 (17) |
| C21—C22 | 1.3900      | C29—O2    | 1.236 (6)  |
| C21—C26 | 1.3900      | C29—N2    | 1.307 (6)  |
| C22—C23 | 1.3900 (13) | C30—C32   | 1.518 (12) |

|             |             |                         |            |
|-------------|-------------|-------------------------|------------|
| C23—C24     | 1.3900      | C30—C31                 | 1.525 (12) |
| C24—C25     | 1.3900      | C30A—C32A               | 1.513 (18) |
| C25—C26     | 1.3900 (17) | C30A—C31A               | 1.520 (18) |
| C2—C1—C6    | 120.9 (8)   | C26—C27—C28             | 113 (6)    |
| C3—C2—C1    | 119.8 (9)   | C22A—C21A—C26A          | 120.0      |
| C2—C3—C4    | 119.2 (9)   | C21A—C22A—C23A          | 120.0      |
| C5—C4—C3    | 120.0 (8)   | C24A—C23A—C22A          | 120.0      |
| C6—C5—C4    | 121.7 (8)   | C25A—C24A—C23A          | 120.0      |
| C5—C6—C1    | 118.4 (7)   | C24A—C25A—C26A          | 120.0      |
| C5—C6—C7    | 122.0 (7)   | C25A—C26A—C21A          | 120.0      |
| C1—C6—C7    | 119.6 (6)   | C25A—C26A—C27A          | 120 (2)    |
| F1—C7—C6    | 107.8 (5)   | C21A—C26A—C27A          | 120 (2)    |
| F1—C7—C8    | 109.7 (5)   | F3A—C27A—C26A           | 103.5 (17) |
| C6—C7—C8    | 114.9 (5)   | F3A—C27A—C28            | 112.2 (12) |
| F2—C8—C9    | 109.1 (5)   | C26A—C27A—C28           | 116 (2)    |
| F2—C8—C7    | 106.4 (4)   | F4—C28—C27              | 104 (4)    |
| C9—C8—C7    | 107.2 (5)   | F4—C28—C27A             | 107.1 (14) |
| F2—C8—C10   | 108.3 (5)   | F4—C28—C29              | 108.5 (4)  |
| C9—C8—C10   | 111.0 (5)   | C27—C28—C29             | 112.7 (17) |
| C7—C8—C10   | 114.7 (5)   | C27A—C28—C29            | 105.4 (8)  |
| O1—C9—N1    | 124.9 (6)   | F4—C28—C30              | 115.1 (6)  |
| O1—C9—C8    | 118.1 (5)   | C27—C28—C30             | 109 (3)    |
| N1—C9—C8    | 117.0 (5)   | C29—C28—C30             | 108.1 (6)  |
| C11—C10—C12 | 111.1 (6)   | F4—C28—C30A             | 90.9 (10)  |
| C11—C10—C8  | 114.1 (6)   | C27A—C28—C30A           | 129.9 (14) |
| C12—C10—C8  | 109.1 (5)   | C29—C28—C30A            | 112.5 (12) |
| C22—C21—C26 | 120.00 (10) | O2—C29—N2               | 124.2 (6)  |
| C23—C22—C21 | 120.00 (7)  | O2—C29—C28              | 117.6 (5)  |
| C24—C23—C22 | 120.0       | N2—C29—C28              | 118.2 (5)  |
| C25—C24—C23 | 120.00 (12) | C32—C30—C31             | 110.3 (11) |
| C26—C25—C24 | 120.00 (9)  | C32—C30—C28             | 115.7 (8)  |
| C25—C26—C21 | 120.0       | C31—C30—C28             | 106.2 (9)  |
| C25—C26—C27 | 123 (6)     | C32A—C30A—C31A          | 110 (2)    |
| C21—C26—C27 | 117 (6)     | C32A—C30A—C28           | 108.5 (15) |
| F3—C27—C26  | 120 (6)     | C31A—C30A—C28           | 119 (3)    |
| F3—C27—C28  | 98 (2)      |                         |            |
| C6—C1—C2—C3 | 0.6 (13)    | C22A—C23A—C24A—<br>C25A | 0.0        |
| C1—C2—C3—C4 | -0.7 (14)   | C23A—C24A—C25A—<br>C26A | 0.0        |
| C2—C3—C4—C5 | 0.8 (14)    | C24A—C25A—C26A—<br>C21A | 0.0        |
| C3—C4—C5—C6 | -0.8 (13)   | C24A—C25A—C26A—         | 177 (2)    |



|                 |            |                     |             |
|-----------------|------------|---------------------|-------------|
|                 |            | C27A                |             |
| C4—C5—C6—C1     | 0.7 (11)   | C22A—C21A—C26A—C25A | 0.0         |
| C4—C5—C6—C7     | -177.4 (7) | C22A—C21A—C26A—C27A | -177 (2)    |
| C2—C1—C6—C5     | -0.6 (11)  | C25A—C26A—C27A—F3A  | -41 (2)     |
| C2—C1—C6—C7     | 177.5 (7)  | C21A—C26A—C27A—F3A  | 136.0 (17)  |
| C5—C6—C7—F1     | 38.4 (9)   | C25A—C26A—C27A—C28  | 82.4 (17)   |
| C1—C6—C7—F1     | -139.6 (6) | C21A—C26A—C27A—C28  | -101 (3)    |
| C5—C6—C7—C8     | -84.2 (8)  | F3—C27—C28—F4       | 66 (5)      |
| C1—C6—C7—C8     | 97.7 (8)   | C26—C27—C28—F4      | -61 (5)     |
| F1—C7—C8—F2     | -58.4 (6)  | F3—C27—C28—C29      | -177 (3)    |
| C6—C7—C8—F2     | 63.2 (7)   | C26—C27—C28—C29     | 56 (6)      |
| F1—C7—C8—C9     | -175.0 (4) | F3—C27—C28—C30      | -57 (6)     |
| C6—C7—C8—C9     | -53.4 (7)  | C26—C27—C28—C30     | 176 (5)     |
| F1—C7—C8—C10    | 61.2 (6)   | F3A—C27A—C28—F4     | 64 (2)      |
| C6—C7—C8—C10    | -177.1 (5) | C26A—C27A—C28—F4    | -55 (2)     |
| F2—C8—C9—O1     | -176.6 (5) | F3A—C27A—C28—C29    | 179.1 (19)  |
| C7—C8—C9—O1     | -61.8 (7)  | C26A—C27A—C28—C29   | 61 (2)      |
| C10—C8—C9—O1    | 64.2 (7)   | F3A—C27A—C28—C30A   | -42 (4)     |
| F2—C8—C9—N1     | 2.8 (7)    | C26A—C27A—C28—C30A  | -161 (2)    |
| C7—C8—C9—N1     | 117.6 (5)  | F4—C28—C29—O2       | 177.6 (5)   |
| C10—C8—C9—N1    | -116.4 (6) | C27—C28—C29—O2      | 63 (4)      |
| F2—C8—C10—C11   | 58.7 (7)   | C27A—C28—C29—O2     | 63.1 (16)   |
| C9—C8—C10—C11   | 178.4 (6)  | C30—C28—C29—O2      | -56.9 (8)   |
| C7—C8—C10—C11   | -59.9 (7)  | C30A—C28—C29—O2     | -83.4 (10)  |
| F2—C8—C10—C12   | -66.1 (6)  | F4—C28—C29—N2       | -3.5 (7)    |
| C9—C8—C10—C12   | 53.6 (7)   | C27—C28—C29—N2      | -118 (4)    |
| C7—C8—C10—C12   | 175.3 (5)  | C27A—C28—C29—N2     | -117.9 (15) |
| C26—C21—C22—C23 | 0.0        | C30—C28—C29—N2      | 122.0 (6)   |
| C21—C22—C23—C24 | 0.00 (5)   | C30A—C28—C29—N2     | 95.5 (10)   |
| C22—C23—C24—C25 | 0.00 (5)   | F4—C28—C30—C32      | -69.6 (10)  |
| C23—C24—C25—C26 | 0.0        | C27—C28—C30—C32     | 46 (3)      |
| C24—C25—C26—C21 | 0.00 (8)   | C29—C28—C30—C32     | 168.9 (7)   |
| C24—C25—C26—C27 | 179 (7)    | F4—C28—C30—C31      | 53.2 (13)   |
| C22—C21—C26—C25 | 0.0        | C27—C28—C30—C31     | 169 (3)     |
| C22—C21—C26—C27 | -179 (6)   | C29—C28—C30—C31     | -68.3 (13)  |
| C25—C26—C27—F3  | -36 (7)    | F4—C28—C30A—C32A    | -159 (2)    |
| C21—C26—C27—F3  | 143 (4)    | C27A—C28—C30A—C32A  | -45 (3)     |
| C25—C26—C27—C28 | 78 (5)     | C29—C28—C30A—C32A   | 91 (2)      |
| C21—C26—C27—C28 | -103 (7)   | F4—C28—C30A—C31A    | 74 (3)      |

|                         |     |                    |          |
|-------------------------|-----|--------------------|----------|
| C26A—C21A—C22A—<br>C23A | 0.0 | C27A—C28—C30A—C31A | -172 (3) |
| C21A—C22A—C23A—<br>C24A | 0.0 | C29—C28—C30A—C31A  | -36 (3)  |

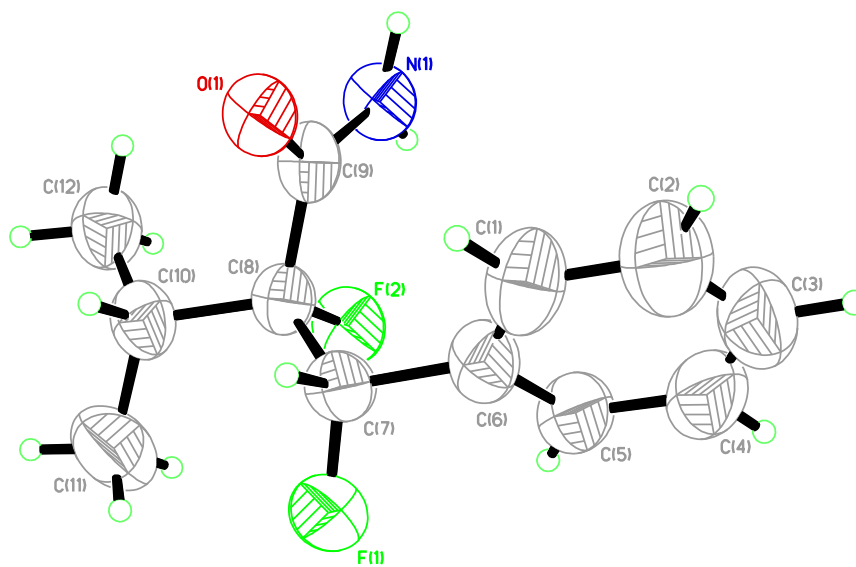

**Figure S10.** Perspective views showing 50% probability displacement.

### X-Ray Crystal Structure of 1,2-Difluoride ( $\pm$ )-7f.

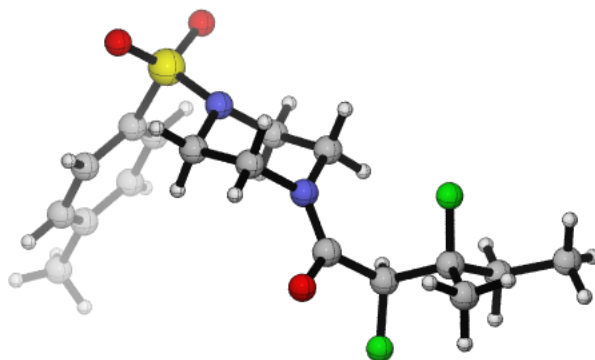

A crystal mounted on a diffractometer was collected data at 100 K. The intensities of the reflections were collected by means of a Bruker APEX II CCD diffractometer ( $\text{Mo}_{K\alpha}$  radiation,  $\lambda=0.71073 \text{ \AA}$ ), and equipped with an Oxford Cryosystems nitrogen flow apparatus. The collection method involved  $0.5^\circ$  scans in  $\omega$  at  $28^\circ$  in  $2\theta$ . Data integration down to  $0.84 \text{ \AA}$  resolution was carried out using SAINT V8.34 C<sup>44</sup> with reflection spot size optimization. Absorption corrections were made with the program SADABS.<sup>44</sup> The structure was solved by the Intrinsic Phasing methods and refined by least-squares methods against  $F^2$  using SHELXT-2014<sup>45</sup> and SHELXL-2014<sup>46</sup> with OLEX 2 interface.<sup>47</sup> Non-hydrogen atoms were refined anisotropically, and hydrogen atoms were allowed to ride on the respective atoms. The Ortep plots produced with SHELXL-2014 program, and the other drawings were produced with Accelrys DS Visualizer 2.0.<sup>48</sup>

**Table S22. Experimental details**

|                             |                                                                    |
|-----------------------------|--------------------------------------------------------------------|
|                             | JWM-VI-20-II                                                       |
| Crystal data                |                                                                    |
| Chemical formula            | $\text{C}_{17}\text{H}_{24}\text{F}_2\text{N}_2\text{O}_3\text{S}$ |
| $M_r$                       | 374.44                                                             |
| Crystal system, space group | Monoclinic, $P2_1$                                                 |
| Temperature (K)             | 100                                                                |
| $a, b, c$ ( $\text{\AA}$ )  | 9.4625 (7), 6.1999 (4), 15.9168 (11)                               |
| $b$ ( $^\circ$ )            | 107.1497 (18)                                                      |
| $V$ ( $\text{\AA}^3$ )      | 892.27 (11)                                                        |
| $Z$                         | 2                                                                  |
| Radiation type              | Mo $K\alpha$                                                       |
| $m$ ( $\text{mm}^{-1}$ )    | 0.22                                                               |

|                                                                       |                                                            |
|-----------------------------------------------------------------------|------------------------------------------------------------|
| Crystal size (mm)                                                     | 0.26 × 0.14 × 0.12                                         |
| Data collection                                                       |                                                            |
| Diffractometer                                                        | Bruker D8 goniometer with CCD area detector diffractometer |
| Absorption correction                                                 | Multi-scan<br><i>SADABS</i>                                |
| $T_{\min}, T_{\max}$                                                  | 0.782, 0.862                                               |
| No. of measured, independent and observed [ $I > 2s(I)$ ] reflections | 22701, 3920, 3234                                          |
| $R_{\text{int}}$                                                      | 0.052                                                      |
| $(\sin \theta/\lambda)_{\text{max}}$ ( $\text{\AA}^{-1}$ )            | 0.641                                                      |
| Refinement                                                            |                                                            |
| $R[F^2 > 2s(F^2)], wR(F^2), S$                                        | 0.071, 0.185, 1.13                                         |
| No. of reflections                                                    | 3920                                                       |
| No. of parameters                                                     | 236                                                        |
| No. of restraints                                                     | 4                                                          |
| H-atom treatment                                                      | H-atom parameters constrained                              |
| $D\rho_{\text{max}}, D\rho_{\text{min}}$ ( $\text{e \AA}^{-3}$ )      | 0.81, -0.39                                                |
| Absolute structure                                                    | Refined as an inversion twin.                              |

**Table S23. Geometric parameters ( $\text{\AA}$ ,  $^\circ$ )**

|        |            |          |            |
|--------|------------|----------|------------|
| C1—C2  | 1.3900     | C10—H10B | 0.9900     |
| C1—C6  | 1.3900     | C11—N1   | 1.479 (7)  |
| C1—H1  | 0.9500     | C11—H11A | 0.9900     |
| C2—C3  | 1.3900     | C11—H11B | 0.9900     |
| C2—H2  | 0.9500     | C12—O3   | 1.244 (8)  |
| C3—C4  | 1.3900     | C12—N2   | 1.328 (8)  |
| C3—S1  | 1.769 (5)  | C12—C13  | 1.530 (9)  |
| C4—C5  | 1.3900     | C13—F1   | 1.400 (7)  |
| C4—H4  | 0.9500     | C13—C14A | 1.502 (10) |
| C5—C6  | 1.3900     | C13—C14  | 1.502 (10) |
| C5—H5  | 0.9500     | C13—H13  | 1.0000     |
| C6—C7  | 1.527 (11) | C13—H13A | 1.0000     |
| C7—H7A | 0.9800     | C14—F2   | 1.410 (7)  |
| C7—H7B | 0.9800     | C14—C17  | 1.474 (11) |
| C7—H7C | 0.9800     | C14—C15  | 1.555 (11) |

|          |            |               |            |
|----------|------------|---------------|------------|
| C1A—C2A  | 1.3900     | C15—C16       | 1.481 (15) |
| C1A—C6A  | 1.3900     | C15—H15A      | 0.9900     |
| C1A—H1A  | 0.9500     | C15—H15B      | 0.9900     |
| C2A—C3A  | 1.3900     | C16—H16A      | 0.9800     |
| C2A—H2A  | 0.9500     | C16—H16B      | 0.9800     |
| C3A—C4A  | 1.3900     | C16—H16C      | 0.9800     |
| C3A—S1   | 1.711 (16) | C14A—F2       | 1.410 (7)  |
| C4A—C5A  | 1.3900     | C14A—C17      | 1.474 (11) |
| C4A—H4A  | 0.9500     | C14A—C15A     | 1.56 (2)   |
| C5A—C6A  | 1.3900     | C15A—C16A     | 1.49 (2)   |
| C5A—H5A  | 0.9500     | C15A—H15C     | 0.9900     |
| C6A—C7A  | 1.45 (4)   | C15A—H15D     | 0.9900     |
| C7A—H7AA | 0.9800     | C16A—H16D     | 0.9800     |
| C7A—H7AB | 0.9800     | C16A—H16E     | 0.9800     |
| C7A—H7AC | 0.9800     | C16A—H16F     | 0.9800     |
| C8—N1    | 1.488 (7)  | C17—H17A      | 0.9800     |
| C8—C9    | 1.520 (8)  | C17—H17B      | 0.9800     |
| C8—H8A   | 0.9900     | C17—H17C      | 0.9800     |
| C8—H8B   | 0.9900     | C17—H17D      | 0.9800     |
| C9—N2    | 1.459 (8)  | C17—H17E      | 0.9800     |
| C9—H9A   | 0.9900     | C17—H17F      | 0.9800     |
| C9—H9B   | 0.9900     | N1—S1         | 1.632 (5)  |
| C10—N2   | 1.451 (7)  | O1—S1         | 1.431 (4)  |
| C10—C11  | 1.526 (9)  | O2—S1         | 1.445 (5)  |
| C10—H10A | 0.9900     |               |            |
| C2—C1—C6 | 120.0      | F1—C13—C14A   | 106.0 (6)  |
| C2—C1—H1 | 120.0      | F1—C13—C14    | 106.0 (6)  |
| C6—C1—H1 | 120.0      | F1—C13—C12    | 109.0 (5)  |
| C1—C2—C3 | 120.0      | C14A—C13—C12  | 113.9 (5)  |
| C1—C2—H2 | 120.0      | C14—C13—C12   | 113.9 (5)  |
| C3—C2—H2 | 120.0      | F1—C13—H13    | 109.3      |
| C4—C3—C2 | 120.0      | C14—C13—H13   | 109.3      |
| C4—C3—S1 | 119.7 (7)  | C12—C13—H13   | 109.3      |
| C2—C3—S1 | 120.2 (7)  | F1—C13—H13A   | 109.3      |
| C5—C4—C3 | 120.0      | C14A—C13—H13A | 109.3      |
| C5—C4—H4 | 120.0      | C12—C13—H13A  | 109.3      |
| C3—C4—H4 | 120.0      | F2—C14—C17    | 109.3 (6)  |
| C6—C5—C4 | 120.0      | F2—C14—C13    | 104.2 (5)  |
| C6—C5—H5 | 120.0      | C17—C14—C13   | 114.2 (6)  |
| C4—C5—H5 | 120.0      | F2—C14—C15    | 101.9 (6)  |
| C5—C6—C1 | 120.0      | C17—C14—C15   | 119.9 (7)  |
| C5—C6—C7 | 119.9 (6)  | C13—C14—C15   | 105.6 (6)  |
| C1—C6—C7 | 120.1 (6)  | C16—C15—C14   | 113.0 (9)  |

|               |           |                |            |
|---------------|-----------|----------------|------------|
| C6—C7—H7A     | 109.5     | C16—C15—H15A   | 109.0      |
| C6—C7—H7B     | 109.5     | C14—C15—H15A   | 109.0      |
| H7A—C7—H7B    | 109.5     | C16—C15—H15B   | 109.0      |
| C6—C7—H7C     | 109.5     | C14—C15—H15B   | 109.0      |
| H7A—C7—H7C    | 109.5     | H15A—C15—H15B  | 107.8      |
| H7B—C7—H7C    | 109.5     | C15—C16—H16A   | 109.5      |
| C2A—C1A—C6A   | 120.0     | C15—C16—H16B   | 109.5      |
| C2A—C1A—H1A   | 120.0     | H16A—C16—H16B  | 109.5      |
| C6A—C1A—H1A   | 120.0     | C15—C16—H16C   | 109.5      |
| C1A—C2A—C3A   | 120.0     | H16A—C16—H16C  | 109.5      |
| C1A—C2A—H2A   | 120.0     | H16B—C16—H16C  | 109.5      |
| C3A—C2A—H2A   | 120.0     | F2—C14A—C17    | 109.3 (6)  |
| C4A—C3A—C2A   | 120.0     | F2—C14A—C13    | 104.2 (5)  |
| C4A—C3A—S1    | 123 (3)   | C17—C14A—C13   | 114.2 (6)  |
| C2A—C3A—S1    | 117 (3)   | F2—C14A—C15A   | 115.4 (12) |
| C3A—C4A—C5A   | 120.0     | C17—C14A—C15A  | 92.8 (10)  |
| C3A—C4A—H4A   | 120.0     | C13—C14A—C15A  | 120.6 (12) |
| C5A—C4A—H4A   | 120.0     | C16A—C15A—C14A | 110.2 (17) |
| C6A—C5A—C4A   | 120.0     | C16A—C15A—H15C | 109.6      |
| C6A—C5A—H5A   | 120.0     | C14A—C15A—H15C | 109.6      |
| C4A—C5A—H5A   | 120.0     | C16A—C15A—H15D | 109.6      |
| C5A—C6A—C1A   | 120.0     | C14A—C15A—H15D | 109.6      |
| C5A—C6A—C7A   | 119 (2)   | H15C—C15A—H15D | 108.1      |
| C1A—C6A—C7A   | 121 (2)   | C15A—C16A—H16D | 109.5      |
| C6A—C7A—H7AA  | 109.5     | C15A—C16A—H16E | 109.5      |
| C6A—C7A—H7AB  | 109.5     | H16D—C16A—H16E | 109.5      |
| H7AA—C7A—H7AB | 109.5     | C15A—C16A—H16F | 109.5      |
| C6A—C7A—H7AC  | 109.5     | H16D—C16A—H16F | 109.5      |
| H7AA—C7A—H7AC | 109.5     | H16E—C16A—H16F | 109.5      |
| H7AB—C7A—H7AC | 109.5     | C14—C17—H17A   | 109.5      |
| N1—C8—C9      | 108.3 (4) | C14—C17—H17B   | 109.5      |
| N1—C8—H8A     | 110.0     | H17A—C17—H17B  | 109.5      |
| C9—C8—H8A     | 110.0     | C14—C17—H17C   | 109.5      |
| N1—C8—H8B     | 110.0     | H17A—C17—H17C  | 109.5      |
| C9—C8—H8B     | 110.0     | H17B—C17—H17C  | 109.5      |
| H8A—C8—H8B    | 108.4     | C14A—C17—H17D  | 109.5      |
| N2—C9—C8      | 110.3 (5) | C14A—C17—H17E  | 109.5      |
| N2—C9—H9A     | 109.6     | H17D—C17—H17E  | 109.5      |
| C8—C9—H9A     | 109.6     | C14A—C17—H17F  | 109.5      |
| N2—C9—H9B     | 109.6     | H17D—C17—H17F  | 109.5      |
| C8—C9—H9B     | 109.6     | H17E—C17—H17F  | 109.5      |
| H9A—C9—H9B    | 108.1     | C11—N1—C8      | 112.5 (5)  |
| N2—C10—C11    | 110.6 (5) | C11—N1—S1      | 116.9 (4)  |

|                 |             |                    |            |
|-----------------|-------------|--------------------|------------|
| N2—C10—H10A     | 109.5       | C8—N1—S1           | 115.5 (4)  |
| C11—C10—H10A    | 109.5       | C12—N2—C10         | 121.0 (5)  |
| N2—C10—H10B     | 109.5       | C12—N2—C9          | 127.2 (5)  |
| C11—C10—H10B    | 109.5       | C10—N2—C9          | 111.8 (5)  |
| H10A—C10—H10B   | 108.1       | O1—S1—O2           | 119.0 (3)  |
| N1—C11—C10      | 107.0 (5)   | O1—S1—N1           | 106.7 (3)  |
| N1—C11—H11A     | 110.3       | O2—S1—N1           | 107.3 (3)  |
| C10—C11—H11A    | 110.3       | O1—S1—C3A          | 106.7 (19) |
| N1—C11—H11B     | 110.3       | O2—S1—C3A          | 112.6 (15) |
| C10—C11—H11B    | 110.3       | N1—S1—C3A          | 103.2 (17) |
| H11A—C11—H11B   | 108.6       | O1—S1—C3           | 109.3 (6)  |
| O3—C12—N2       | 122.8 (6)   | O2—S1—C3           | 106.0 (4)  |
| O3—C12—C13      | 116.8 (6)   | N1—S1—C3           | 108.1 (5)  |
| N2—C12—C13      | 120.4 (6)   |                    |            |
| C6—C1—C2—C3     | 0.0         | F1—C13—C14A—C17    | -53.2 (7)  |
| C1—C2—C3—C4     | 0.0         | C12—C13—C14A—C17   | 66.6 (8)   |
| C1—C2—C3—S1     | -177.8 (10) | F1—C13—C14A—C15A   | 56.0 (13)  |
| C2—C3—C4—C5     | 0.0         | C12—C13—C14A—C15A  | 175.9 (12) |
| S1—C3—C4—C5     | 177.8 (10)  | F2—C14A—C15A—C16A  | -72 (2)    |
| C3—C4—C5—C6     | 0.0         | C17—C14A—C15A—C16A | 175 (2)    |
| C4—C5—C6—C1     | 0.0         | C13—C14A—C15A—C16A | 55 (2)     |
| C4—C5—C6—C7     | -178.9 (8)  | C10—C11—N1—C8      | 59.5 (6)   |
| C2—C1—C6—C5     | 0.0         | C10—C11—N1—S1      | -163.3 (4) |
| C2—C1—C6—C7     | 178.9 (8)   | C9—C8—N1—C11       | -59.0 (7)  |
| C6A—C1A—C2A—C3A | 0.0         | C9—C8—N1—S1        | 163.2 (4)  |
| C1A—C2A—C3A—C4A | 0.0         | O3—C12—N2—C10      | 2.1 (10)   |
| C1A—C2A—C3A—S1  | 178 (3)     | C13—C12—N2—C10     | -178.5 (6) |
| C2A—C3A—C4A—C5A | 0.0         | O3—C12—N2—C9       | -178.1 (6) |
| S1—C3A—C4A—C5A  | -178 (4)    | C13—C12—N2—C9      | 1.3 (9)    |
| C3A—C4A—C5A—C6A | 0.0         | C11—C10—N2—C12     | -120.4 (6) |
| C4A—C5A—C6A—C1A | 0.0         | C11—C10—N2—C9      | 59.8 (7)   |
| C4A—C5A—C6A—C7A | -179 (2)    | C8—C9—N2—C12       | 121.9 (6)  |
| C2A—C1A—C6A—C5A | 0.0         | C8—C9—N2—C10       | -58.2 (6)  |
| C2A—C1A—C6A—C7A | 179 (3)     | C11—N1—S1—O1       | 44.4 (5)   |
| N1—C8—C9—N2     | 56.1 (7)    | C8—N1—S1—O1        | -179.7 (4) |
| N2—C10—C11—N1   | -58.5 (7)   | C11—N1—S1—O2       | 173.1 (4)  |
| O3—C12—C13—F1   | 26.8 (8)    | C8—N1—S1—O2        | -51.1 (5)  |
| N2—C12—C13—F1   | -152.6 (6)  | C11—N1—S1—C3A      | -67.8 (18) |
| O3—C12—C13—C14A | -91.3 (8)   | C8—N1—S1—C3A       | 68.0 (18)  |
| N2—C12—C13—C14A | 89.2 (7)    | C11—N1—S1—C3       | -73.0 (6)  |
| O3—C12—C13—C14  | -91.3 (8)   | C8—N1—S1—C3        | 62.8 (7)   |

|                 |            |               |             |
|-----------------|------------|---------------|-------------|
| N2—C12—C13—C14  | 89.2 (7)   | C4A—C3A—S1—O1 | -33 (3)     |
| F1—C13—C14—F2   | -172.4 (5) | C2A—C3A—S1—O1 | 148.9 (13)  |
| C12—C13—C14—F2  | -52.6 (7)  | C4A—C3A—S1—O2 | -165.4 (17) |
| F1—C13—C14—C17  | -53.2 (7)  | C2A—C3A—S1—O2 | 17 (2)      |
| C12—C13—C14—C17 | 66.6 (8)   | C4A—C3A—S1—N1 | 79 (3)      |
| F1—C13—C14—C15  | 80.6 (7)   | C2A—C3A—S1—N1 | -98.8 (15)  |
| C12—C13—C14—C15 | -159.5 (7) | C4—C3—S1—O1   | -30.4 (8)   |
| F2—C14—C15—C16  | 71.8 (10)  | C2—C3—S1—O1   | 147.4 (4)   |
| C17—C14—C15—C16 | -49.0 (13) | C4—C3—S1—O2   | -159.8 (5)  |
| C13—C14—C15—C16 | -179.6 (8) | C2—C3—S1—O2   | 18.0 (6)    |
| F1—C13—C14A—F2  | -172.4 (5) | C4—C3—S1—N1   | 85.4 (7)    |
| C12—C13—C14A—F2 | -52.6 (7)  | C2—C3—S1—N1   | -96.8 (5)   |

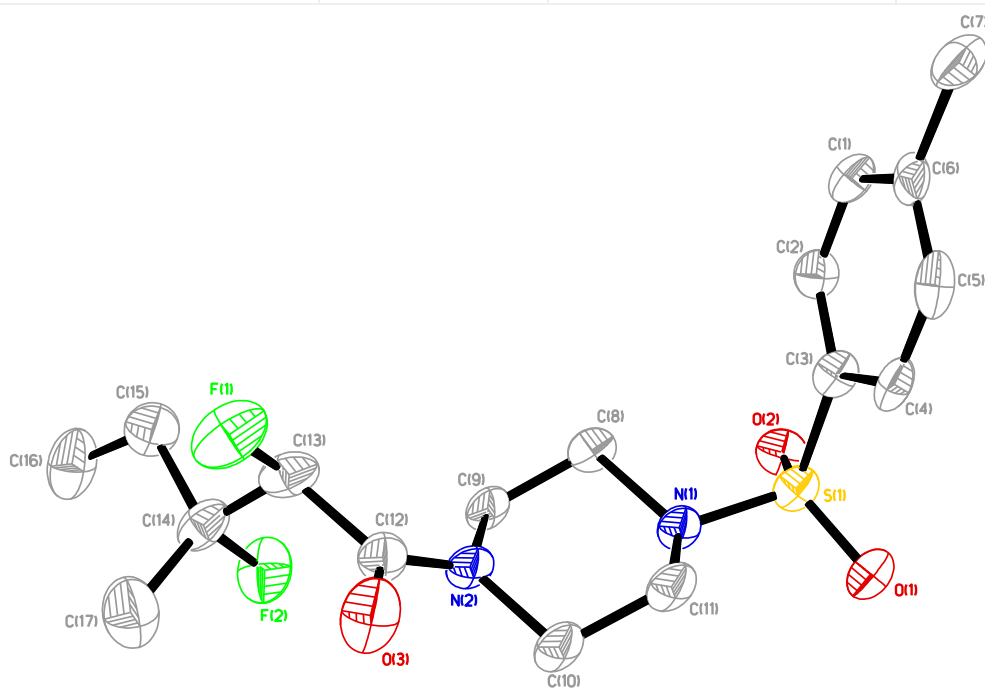

**Figure S11.** Perspective views showing 50% probability displacement.



### X-Ray Crystal Structure of 1,2-Difluoride ( $\pm$ )-7g.

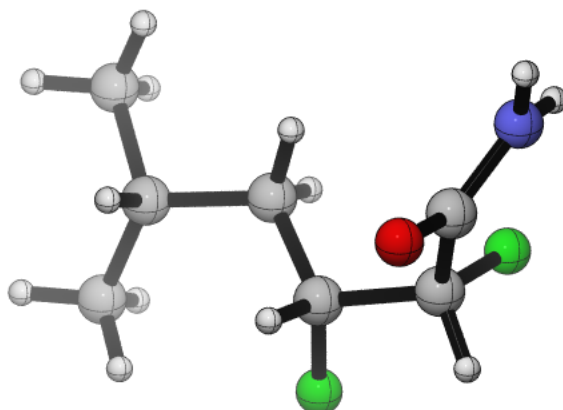

A crystal mounted on a diffractometer was collected data at 100 K. The intensities of the reflections were collected by means of a Bruker APEX II CCD diffractometer ( $\text{MoK}_\alpha$  radiation,  $\lambda=0.71073 \text{ \AA}$ ), and equipped with an Oxford Cryosystems nitrogen flow apparatus. The collection method involved  $0.5^\circ$  scans in  $\omega$  at  $28^\circ$  in  $2\theta$ . Data integration down to  $0.84 \text{ \AA}$  resolution was carried out using SAINT V8.34 C<sup>44</sup> with reflection spot size optimization. Absorption corrections were made with the program SADABS.<sup>44</sup> The structure was solved by the Intrinsic Phasing methods and refined by least-squares methods against  $F^2$  using SHELXT-2014<sup>45</sup> and SHELXL-2014<sup>46</sup> with OLEX 2 interface.<sup>47</sup> Non-hydrogen atoms were refined anisotropically, and hydrogen atoms were allowed to ride on the respective atoms. The Ortep plots produced with SHELXL-2014 program, and the other drawings were produced with Accelrys DS Visualizer 2.0.<sup>48</sup>

**Table S24. Experimental details**

|                             |                                              |
|-----------------------------|----------------------------------------------|
|                             | JWM-V-216                                    |
| Crystal data                |                                              |
| Chemical formula            | $\text{C}_7\text{H}_{13}\text{F}_2\text{NO}$ |
| $M_r$                       | 165.18                                       |
| Crystal system, space group | Monoclinic, $P2_1/c$                         |
| Temperature (K)             | 100                                          |
| $a, b, c$ ( $\text{\AA}$ )  | 16.353 (3), 5.1206 (10), 10.1150 (18)        |
| $b$ ( $^\circ$ )            | 90.805 (5)                                   |
| $V$ ( $\text{\AA}^3$ )      | 846.9 (3)                                    |
| $Z$                         | 4                                            |
| Radiation type              | Mo $K\alpha$                                 |
| $\mu$ ( $\text{mm}^{-1}$ )  | 0.12                                         |

|                                                                       |                                                                        |
|-----------------------------------------------------------------------|------------------------------------------------------------------------|
| Crystal size (mm)                                                     | 0.26 × 0.18 × 0.14                                                     |
| Data collection                                                       |                                                                        |
| Diffractometer                                                        | Bruker D8 goniometer with CCD area detector diffractometer             |
| Absorption correction                                                 | Multi-scan<br><i>SADABS</i>                                            |
| $T_{\min}, T_{\max}$                                                  | 0.699, 0.862                                                           |
| No. of measured, independent and observed [ $I > 2s(I)$ ] reflections | 11749, 1489, 1232                                                      |
| $R_{\text{int}}$                                                      | 0.070                                                                  |
| $(\sin \theta)_{\text{max}}$ ( $\text{\AA}^{-1}$ )                    | 0.596                                                                  |
| Refinement                                                            |                                                                        |
| $R[F^2 > 2s(F^2)], wR(F^2), S$                                        | 0.085, 0.238, 1.13                                                     |
| No. of reflections                                                    | 1489                                                                   |
| No. of parameters                                                     | 118                                                                    |
| No. of restraints                                                     | 5                                                                      |
| H-atom treatment                                                      | H atoms treated by a mixture of independent and constrained refinement |
| $D\rho_{\text{max}}, D\rho_{\text{min}}$ ( $\text{e \AA}^{-3}$ )      | 0.55, -0.76                                                            |

**Table S25. Geometric parameters ( $\text{\AA}, ^\circ$ )**

|         |            |          |          |
|---------|------------|----------|----------|
| C1—O1   | 1.236 (4)  | C6—H6A   | 0.9800   |
| C1—N1   | 1.315 (4)  | C6—H6B   | 0.9800   |
| C1—C2   | 1.528 (5)  | C6—H6C   | 0.9800   |
| C2—F1   | 1.397 (4)  | C7—H7A   | 0.9800   |
| C2—C3   | 1.513 (5)  | C7—H7B   | 0.9800   |
| C2—H2   | 1.0000     | C7—H7C   | 0.9800   |
| C3—F2   | 1.414 (4)  | C5A—C7A  | 1.53 (2) |
| C3—C4   | 1.511 (6)  | C5A—C6A  | 1.58 (2) |
| C3—H3   | 1.0000     | C5A—H5A  | 1.0000   |
| C4—C5A  | 1.513 (19) | C6A—H6AA | 0.9800   |
| C4—C5   | 1.525 (7)  | C6A—H6AB | 0.9800   |
| C4—H4AA | 0.9900     | C6A—H6AC | 0.9800   |
| C4—H4AB | 0.9900     | C7A—H7AA | 0.9800   |
| C4—H4BC | 0.9900     | C7A—H7AB | 0.9800   |
| C4—H4BD | 0.9900     | C7A—H7AC | 0.9800   |

|              |            |               |            |
|--------------|------------|---------------|------------|
| C5—C7        | 1.519 (7)  | N1—H1A        | 0.86 (4)   |
| C5—C6        | 1.593 (8)  | N1—H1B        | 0.91 (5)   |
| C5—H5        | 1.0000     |               |            |
| O1—C1—N1     | 125.1 (3)  | C5—C6—H6A     | 109.5      |
| O1—C1—C2     | 117.4 (3)  | C5—C6—H6B     | 109.5      |
| N1—C1—C2     | 117.4 (3)  | H6A—C6—H6B    | 109.5      |
| F1—C2—C3     | 110.5 (3)  | C5—C6—H6C     | 109.5      |
| F1—C2—C1     | 109.9 (3)  | H6A—C6—H6C    | 109.5      |
| C3—C2—C1     | 111.7 (3)  | H6B—C6—H6C    | 109.5      |
| F1—C2—H2     | 108.2      | C5—C7—H7A     | 109.5      |
| C3—C2—H2     | 108.2      | C5—C7—H7B     | 109.5      |
| C1—C2—H2     | 108.2      | H7A—C7—H7B    | 109.5      |
| F2—C3—C4     | 109.7 (3)  | C5—C7—H7C     | 109.5      |
| F2—C3—C2     | 104.8 (3)  | H7A—C7—H7C    | 109.5      |
| C4—C3—C2     | 115.3 (3)  | H7B—C7—H7C    | 109.5      |
| F2—C3—H3     | 109.0      | C4—C5A—C7A    | 103 (2)    |
| C4—C3—H3     | 109.0      | C4—C5A—C6A    | 108.1 (16) |
| C2—C3—H3     | 109.0      | C7A—C5A—C6A   | 111.1 (18) |
| C3—C4—C5A    | 127.8 (12) | C4—C5A—H5A    | 111.4      |
| C3—C4—C5     | 114.1 (4)  | C7A—C5A—H5A   | 111.4      |
| C3—C4—H4AA   | 108.7      | C6A—C5A—H5A   | 111.4      |
| C5—C4—H4AA   | 108.7      | C5A—C6A—H6AA  | 109.5      |
| C3—C4—H4AB   | 108.7      | C5A—C6A—H6AB  | 109.5      |
| C5—C4—H4AB   | 108.7      | H6AA—C6A—H6AB | 109.5      |
| H4AA—C4—H4AB | 107.6      | C5A—C6A—H6AC  | 109.5      |
| C3—C4—H4BC   | 105.4      | H6AA—C6A—H6AC | 109.5      |
| C5A—C4—H4BC  | 105.4      | H6AB—C6A—H6AC | 109.5      |
| C3—C4—H4BD   | 105.4      | C5A—C7A—H7AA  | 109.5      |
| C5A—C4—H4BD  | 105.4      | C5A—C7A—H7AB  | 109.5      |
| H4BC—C4—H4BD | 106.0      | H7AA—C7A—H7AB | 109.5      |
| C7—C5—C4     | 116.4 (4)  | C5A—C7A—H7AC  | 109.5      |
| C7—C5—C6     | 110.4 (4)  | H7AA—C7A—H7AC | 109.5      |
| C4—C5—C6     | 106.8 (5)  | H7AB—C7A—H7AC | 109.5      |
| C7—C5—H5     | 107.7      | C1—N1—H1A     | 129 (3)    |
| C4—C5—H5     | 107.7      | C1—N1—H1B     | 118 (3)    |
| C6—C5—H5     | 107.7      | H1A—N1—H1B    | 113 (4)    |

**Table S26. Hydrogen-bond geometric parameters (Å, °)**

| <i>D</i> —H $\cdots$ <i>A</i>    | <i>D</i> —H | H $\cdots$ <i>A</i> | <i>D</i> $\cdots$ <i>A</i> | <i>D</i> —H $\cdots$ <i>A</i> |
|----------------------------------|-------------|---------------------|----------------------------|-------------------------------|
| N1—H1B $\cdots$ O1 <sup>i</sup>  | 0.91 (5)    | 2.02 (5)            | 2.922 (4)                  | 170 (4)                       |
| N1—H1A $\cdots$ O1 <sup>ii</sup> | 0.86 (4)    | 2.08 (4)            | 2.860 (4)                  | 151 (4)                       |

Symmetry codes: (i)  $-x+1, y+1/2, -z+1/2$ ; (ii)  $x, y+1, z$ .

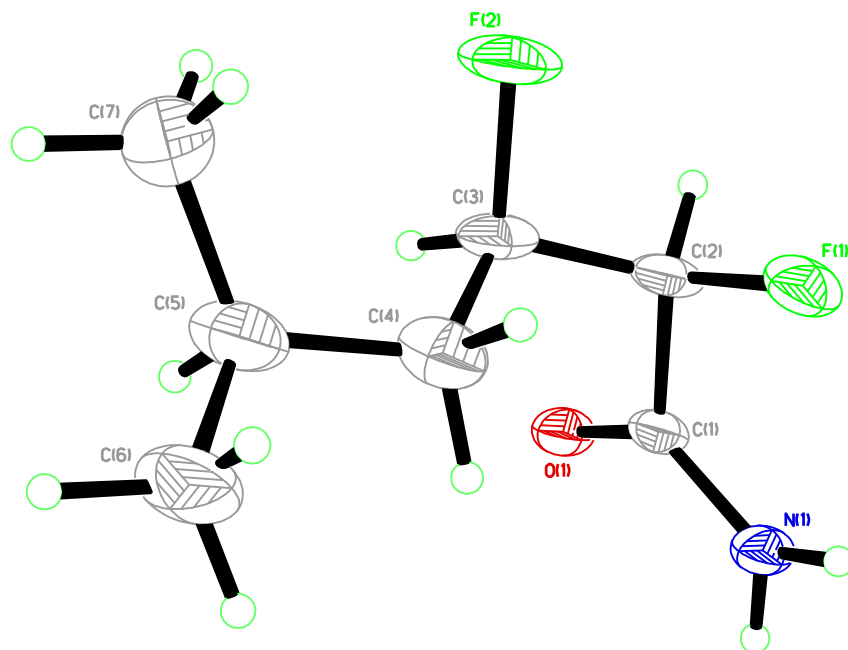

**Figure 12.** Perspective views showing 50% probability displacement.

### X-Ray Crystal Structure of 1,2-Difluoride ( $\pm$ )-7k.

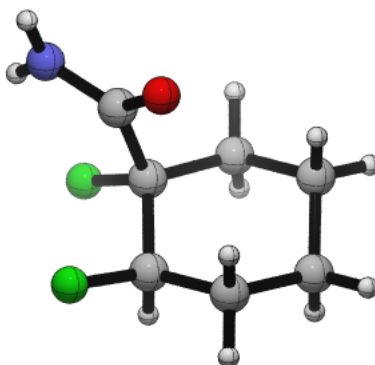

A crystal mounted on a diffractometer was collected data at 100 K. The intensities of the reflections were collected by means of a Bruker APEX II DUO CCD diffractometer ( $\text{Cu}_{\text{K}\alpha}$  radiation,  $\lambda=1.54178 \text{ \AA}$ ), and equipped with an Oxford Cryosystems nitrogen flow apparatus. The collection method involved  $1.0^\circ$  scans in  $\omega$  at  $-30^\circ$ ,  $-55^\circ$ ,  $-80^\circ$ ,  $30^\circ$ ,  $55^\circ$ ,  $80^\circ$  and  $115^\circ$  in  $2\theta$ . Data integration down to  $0.84 \text{ \AA}$  resolution was carried out using SAINT V8.34 C<sup>44</sup> with reflection spot size optimization. Absorption corrections were made with the program SADABS.<sup>44</sup> The structure was solved by the Intrinsic Phasing methods and refined by least-squares methods again  $F^2$  using SHELXT-2014<sup>45</sup> and SHELXL-2014<sup>46</sup> with OLEX 2 interface.<sup>47</sup> Non-hydrogen atoms were refined anisotropically, and hydrogen atoms were allowed to ride on the respective atoms. The Ortep plots produced with SHELXL-2014 program, and the other drawings were produced with Accelrys DS Visualizer 2.0.<sup>48</sup>

**Table S27. Experimental details**

|                             |                                                            |
|-----------------------------|------------------------------------------------------------|
|                             | JWM-V-232                                                  |
| Crystal data                |                                                            |
| Chemical formula            | $\text{C}_7\text{H}_{11}\text{c}_2\text{NO}$               |
| $M_r$                       | 163.17                                                     |
| Crystal system, space group | Orthorhombic, $Pca2_1$                                     |
| Temperature (K)             | 100                                                        |
| $a, b, c$ ( $\text{\AA}$ )  | 23.3079 (12), 6.1672 (3), 10.5727 (5)                      |
| $V$ ( $\text{\AA}^3$ )      | 1519.77 (13)                                               |
| $Z$                         | 8                                                          |
| Radiation type              | Cu $K\alpha$                                               |
| $\mu$ ( $\text{mm}^{-1}$ )  | 1.11                                                       |
| Crystal size (mm)           | $0.18 \times 0.16 \times 0.14$                             |
| Data collection             |                                                            |
| Diffractometer              | Bruker D8 goniometer with CCD area detector diffractometer |
| Absorption correction       | Multi-scan                                                 |

|                                                                       |                                                                                                                              |
|-----------------------------------------------------------------------|------------------------------------------------------------------------------------------------------------------------------|
|                                                                       | <i>SADABS</i>                                                                                                                |
| $T_{\min}, T_{\max}$                                                  | 0.749, 0.864                                                                                                                 |
| No. of measured, independent and observed [ $I > 2s(I)$ ] reflections | 25359, 2680, 2653                                                                                                            |
| $R_{\text{int}}$                                                      | 0.039                                                                                                                        |
| $(\sin \theta/\lambda)_{\text{max}}$ ( $\text{\AA}^{-1}$ )            | 0.595                                                                                                                        |
| Refinement                                                            |                                                                                                                              |
| $R[F^2 > 2s(F^2)], wR(F^2), S$                                        | 0.032, 0.108, 1.06                                                                                                           |
| No. of reflections                                                    | 2680                                                                                                                         |
| No. of parameters                                                     | 216                                                                                                                          |
| No. of restraints                                                     | 1                                                                                                                            |
| H-atom treatment                                                      | H atoms treated by a mixture of independent and constrained refinement                                                       |
| $D\rho_{\text{max}}, D\rho_{\text{min}}$ ( $e \text{\AA}^{-3}$ )      | 0.22, -0.21                                                                                                                  |
| Absolute structure                                                    | Flack x determined using 1193 quotients [(I+)-(I-)]/[(I+)+(I-)] (Parsons, Flack and Wagner, Acta Cryst. B69 (2013) 249-259). |
| Absolute structure parameter                                          | 0.03 (5)                                                                                                                     |

**Table S28. Geometric parameters ( $\text{\AA}$ ,  $^\circ$ )**

|          |           |             |           |
|----------|-----------|-------------|-----------|
| C1—F1    | 1.409 (4) | C11—F3      | 1.412 (4) |
| C1—C2    | 1.508 (5) | C11—C12     | 1.514 (5) |
| C1—C6    | 1.520 (4) | C11—C16     | 1.525 (4) |
| C2—C3    | 1.535 (5) | C12—C13     | 1.532 (5) |
| C3—C4    | 1.522 (5) | C13—C14     | 1.526 (5) |
| C4—C5    | 1.532 (5) | C14—C15     | 1.531 (5) |
| C5—C6    | 1.530 (5) | C15—C16     | 1.517 (5) |
| C6—F2    | 1.418 (4) | C16—F4      | 1.413 (4) |
| C6—C7    | 1.532 (4) | C16—C17     | 1.528 (5) |
| C7—O1    | 1.236 (4) | C17—O2      | 1.234 (4) |
| C7—N1    | 1.329 (5) | C17—N2      | 1.331 (5) |
| F1—C1—C2 | 110.0 (3) | F3—C11—C12  | 109.8 (3) |
| F1—C1—C6 | 108.6 (3) | F3—C11—C16  | 108.2 (3) |
| C2—C1—C6 | 113.8 (3) | C12—C11—C16 | 114.6 (3) |
| C1—C2—C3 | 109.9 (3) | C11—C12—C13 | 109.3 (3) |
| C4—C3—C2 | 111.6 (3) | C14—C13—C12 | 110.2 (3) |
| C3—C4—C5 | 111.0 (3) | C13—C14—C15 | 109.9 (3) |
| C6—C5—C4 | 113.3 (3) | C16—C15—C14 | 113.7 (3) |

|             |            |                 |            |
|-------------|------------|-----------------|------------|
| F2—C6—C1    | 106.8 (3)  | F4—C16—C15      | 107.3 (3)  |
| F2—C6—C5    | 106.7 (3)  | F4—C16—C11      | 105.7 (2)  |
| C1—C6—C5    | 110.8 (3)  | C15—C16—C11     | 111.7 (3)  |
| F2—C6—C7    | 107.3 (3)  | F4—C16—C17      | 106.8 (3)  |
| C1—C6—C7    | 112.4 (3)  | C15—C16—C17     | 111.9 (3)  |
| C5—C6—C7    | 112.5 (3)  | C11—C16—C17     | 112.9 (3)  |
| O1—C7—N1    | 123.8 (3)  | O2—C17—N2       | 123.9 (3)  |
| O1—C7—C6    | 119.6 (3)  | O2—C17—C16      | 119.4 (3)  |
| N1—C7—C6    | 116.6 (3)  | N2—C17—C16      | 116.7 (3)  |
| F1—C1—C2—C3 | -178.0 (3) | F3—C11—C12—C13  | -176.5 (3) |
| C6—C1—C2—C3 | -55.9 (4)  | C16—C11—C12—C13 | -54.5 (4)  |
| C1—C2—C3—C4 | 56.6 (4)   | C11—C12—C13—C14 | 59.7 (4)   |
| C2—C3—C4—C5 | -55.1 (4)  | C12—C13—C14—C15 | -59.7 (4)  |
| C3—C4—C5—C6 | 52.4 (4)   | C13—C14—C15—C16 | 54.0 (4)   |
| F1—C1—C6—F2 | -68.5 (3)  | C14—C15—C16—F4  | -163.1 (3) |
| C2—C1—C6—F2 | 168.6 (3)  | C14—C15—C16—C11 | -47.6 (4)  |
| F1—C1—C6—C5 | 175.7 (3)  | C14—C15—C16—C17 | 80.0 (4)   |
| C2—C1—C6—C5 | 52.8 (4)   | F3—C11—C16—F4   | -72.2 (3)  |
| F1—C1—C6—C7 | 48.9 (4)   | C12—C11—C16—F4  | 164.9 (3)  |
| C2—C1—C6—C7 | -74.0 (4)  | F3—C11—C16—C15  | 171.4 (3)  |
| C4—C5—C6—F2 | -166.3 (3) | C12—C11—C16—C15 | 48.5 (4)   |
| C4—C5—C6—C1 | -50.4 (4)  | F3—C11—C16—C17  | 44.2 (4)   |
| C4—C5—C6—C7 | 76.3 (3)   | C12—C11—C16—C17 | -78.7 (4)  |
| F2—C6—C7—O1 | -174.6 (3) | F4—C16—C17—O2   | 176.2 (3)  |
| C1—C6—C7—O1 | 68.3 (4)   | C15—C16—C17—O2  | -66.6 (4)  |
| C5—C6—C7—O1 | -57.5 (4)  | C11—C16—C17—O2  | 60.4 (4)   |
| F2—C6—C7—N1 | 5.2 (4)    | F4—C16—C17—N2   | -4.4 (4)   |
| C1—C6—C7—N1 | -111.9 (3) | C15—C16—C17—N2  | 112.7 (3)  |
| C5—C6—C7—N1 | 122.2 (3)  | C11—C16—C17—N2  | -120.2 (3) |

**Table S29. Hydrogen-bond geometric parameters (Å, °)**

| <i>D</i> —H $\cdots$ <i>A</i>             | <i>D</i> —H | H $\cdots$ <i>A</i> | <i>D</i> $\cdots$ <i>A</i> | <i>D</i> —H $\cdots$ <i>A</i> |
|-------------------------------------------|-------------|---------------------|----------------------------|-------------------------------|
| N1—H1 <i>B</i> $\cdots$ F2                | 0.83 (5)    | 2.17 (4)            | 2.557 (4)                  | 108 (4)                       |
| N1—H1 <i>A</i> $\cdots$ O2 <sup>i</sup>   | 0.88 (5)    | 2.06 (5)            | 2.928 (4)                  | 171 (4)                       |
| N1—H1 <i>B</i> $\cdots$ F3 <sup>ii</sup>  | 0.83 (5)    | 2.43 (5)            | 3.175 (4)                  | 150 (4)                       |
| N2—H2 <i>C</i> $\cdots$ O1 <sup>iii</sup> | 0.86 (5)    | 2.08 (5)            | 2.933 (4)                  | 175 (4)                       |
| N2—H2 <i>D</i> $\cdots$ O2 <sup>iv</sup>  | 0.86 (5)    | 2.31 (5)            | 3.173 (4)                  | 173 (4)                       |
| N2—H2 <i>D</i> $\cdots$ F4                | 0.86 (5)    | 2.16 (4)            | 2.542 (4)                  | 106 (3)                       |

Symmetry codes: (i)  $x-1/2, -y, z$ ; (ii)  $-x+1, -y, z-1/2$ ; (iii)  $x+1/2, -y, z$ ; (iv)  $-x+3/2, y, z+1/2$ .

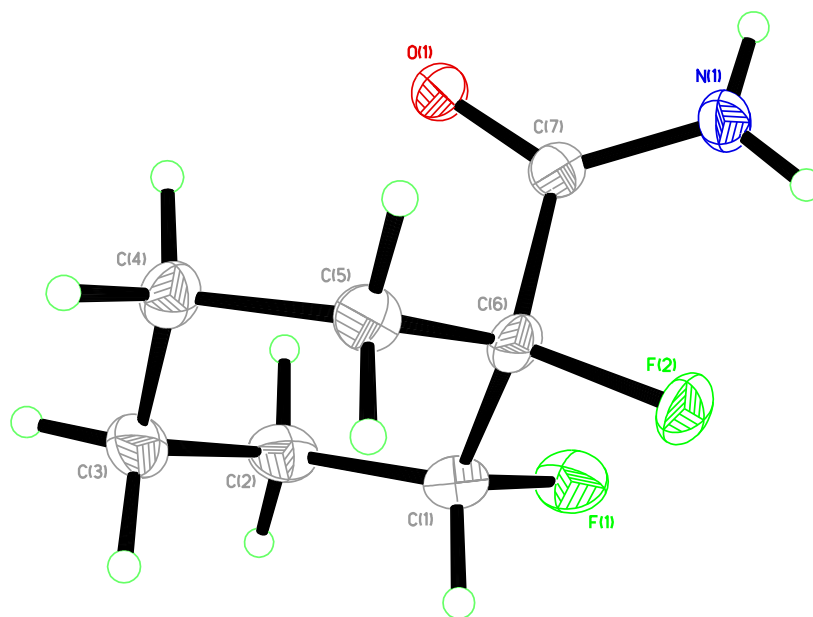

**Figure S13.** Perspective views showing 50% probability displacement.



### X-Ray Crystal Structure of 1,2-Difluoride (+)-7c.

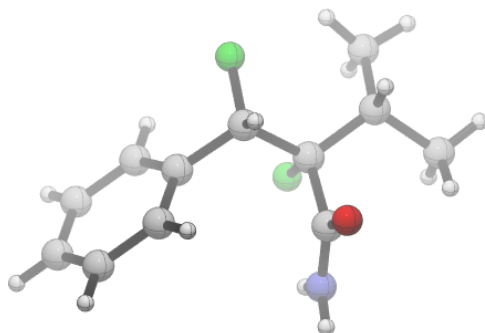

A crystal mounted on a diffractometer was collected data at 100 K. The intensities of the reflections were collected by means of a Bruker APEX II DUO CCD diffractometer (Cu<sub>K</sub>α radiation, λ=1.54178 Å), and equipped with an Oxford Cryosystems nitrogen flow apparatus. The collection method involved 1.0° scans in ω at -30°, -55°, -80°, 30°, 55°, 80° and 115° in 2θ. Data integration down to 0.84 Å resolution was carried out using SAINT V8.34 C<sup>44</sup> with reflection spot size optimization. Absorption corrections were made with the program SADABS.<sup>44</sup> The structure was solved by the Intrinsic Phasing methods and refined by least-squares methods again *F*<sup>2</sup> using SHELXT-2014<sup>45</sup> and SHELXL-2014<sup>46</sup> with OLEX 2 interface.<sup>47</sup> Non-hydrogen atoms were refined anisotropically, and hydrogen atoms were allowed to ride on the respective atoms. The Ortep plots produced with SHELXL-2014 program, and the other drawings were produced with Accelrys DS Visualizer 2.<sup>48</sup>

**Table S30. Experimental details**

|                                    |                                                   |
|------------------------------------|---------------------------------------------------|
|                                    | SMB-10-222                                        |
| Crystal data                       |                                                   |
| Chemical formula                   | C <sub>12</sub> H <sub>15</sub> F <sub>2</sub> NO |
| <i>M</i> <sub>r</sub>              | 227.25                                            |
| Crystal system, space group        | Monoclinic, <i>P</i> 2 <sub>1</sub>               |
| Temperature (K)                    | 100                                               |
| <i>a</i> , <i>b</i> , <i>c</i> (Å) | 5.13445 (9), 12.7905 (2), 17.8653 (3)             |
| <i>b</i> (°)                       | 95.3412 (9)                                       |
| <i>V</i> (Å <sup>3</sup> )         | 1168.16 (4)                                       |
| <i>Z</i>                           | 4                                                 |
| Radiation type                     | Cu <i>K</i> α                                     |
| <i>m</i> (mm <sup>-1</sup> )       | 0.88                                              |
| Crystal size (mm)                  | 0.18 × 0.08 × 0.06                                |
|                                    |                                                   |

|                                                                       |                                                                                                                                      |
|-----------------------------------------------------------------------|--------------------------------------------------------------------------------------------------------------------------------------|
| Data collection                                                       |                                                                                                                                      |
| Diffractionmeter                                                      | Bruker D8 goniometer with CCD area detector                                                                                          |
| Absorption correction                                                 | Multi-scan<br><i>SADABS</i>                                                                                                          |
| $T_{\min}, T_{\max}$                                                  | 0.655, 0.753                                                                                                                         |
| No. of measured, independent and observed [ $I > 2s(I)$ ] reflections | 14247, 3828, 3709                                                                                                                    |
| $R_{\text{int}}$                                                      | 0.031                                                                                                                                |
| $(\sin \theta/\lambda)_{\text{max}}$ ( $\text{\AA}^{-1}$ )            | 0.596                                                                                                                                |
| Refinement                                                            |                                                                                                                                      |
| $R[F^2 > 2s(F^2)], wR(F^2), S$                                        | 0.027, 0.072, 1.05                                                                                                                   |
| No. of reflections                                                    | 3828                                                                                                                                 |
| No. of parameters                                                     | 309                                                                                                                                  |
| No. of restraints                                                     | 1                                                                                                                                    |
| H-atom treatment                                                      | H atoms treated by a mixture of independent and constrained refinement                                                               |
| $D\rho_{\text{max}}, D\rho_{\text{min}}$ ( $e \text{\AA}^{-3}$ )      | 0.15, -0.15                                                                                                                          |
| Absolute structure                                                    | Flack $x$ determined using 1574 quotients $[(I^+)-(I^-)]/[(I^+)+(I^-)]$ (Parsons, Flack and Wagner, Acta Cryst. B69 (2013) 249-259). |
| Absolute structure parameter                                          | -0.09 (6)                                                                                                                            |

**Table S31. Geometric parameters ( $\text{\AA}$ ,  $^\circ$ )**

|        |           |         |           |
|--------|-----------|---------|-----------|
| F1—C7  | 1.398 (2) | F3—C27  | 1.403 (2) |
| F2—C8  | 1.407 (2) | F4—C28  | 1.408 (2) |
| O1—C9  | 1.245 (2) | O2—C29  | 1.242 (2) |
| N1—C9  | 1.317 (3) | N2—C29  | 1.318 (3) |
| N1—H1A | 0.87 (3)  | N2—H2A  | 0.89 (3)  |
| N1—H1B | 0.91 (3)  | N2—H2B  | 0.88 (3)  |
| C1—C2  | 1.392 (3) | C21—C22 | 1.386 (3) |
| C1—C6  | 1.393 (3) | C21—C26 | 1.393 (3) |
| C1—H1  | 0.9500    | C21—H21 | 0.9500    |
| C2—C3  | 1.387 (3) | C22—C23 | 1.389 (3) |
| C2—H2  | 0.9500    | C22—H22 | 0.9500    |
| C3—C4  | 1.386 (3) | C23—C24 | 1.387 (3) |

|            |            |             |            |
|------------|------------|-------------|------------|
| C3—H3      | 0.9500     | C23—H23     | 0.9500     |
| C4—C5      | 1.384 (3)  | C24—C25     | 1.394 (3)  |
| C4—H4      | 0.9500     | C24—H24     | 0.9500     |
| C5—C6      | 1.395 (3)  | C25—C26     | 1.392 (3)  |
| C5—H5      | 0.9500     | C25—H25     | 0.9500     |
| C6—C7      | 1.510 (3)  | C26—C27     | 1.513 (3)  |
| C7—C8      | 1.541 (3)  | C27—C28     | 1.543 (3)  |
| C7—H7      | 1.0000     | C27—H27     | 1.0000     |
| C8—C9      | 1.535 (3)  | C28—C29     | 1.535 (3)  |
| C8—C10     | 1.544 (3)  | C28—C30     | 1.543 (3)  |
| C10—C11    | 1.525 (3)  | C30—C32     | 1.533 (3)  |
| C10—C12    | 1.535 (3)  | C30—C31     | 1.537 (3)  |
| C10—H10    | 1.0000     | C30—H30     | 1.0000     |
| C11—H11A   | 0.9800     | C31—H31A    | 0.9800     |
| C11—H11B   | 0.9800     | C31—H31B    | 0.9800     |
| C11—H11C   | 0.9800     | C31—H31C    | 0.9800     |
| C12—H12A   | 0.9800     | C32—H32A    | 0.9800     |
| C12—H12B   | 0.9800     | C32—H32B    | 0.9800     |
| C12—H12C   | 0.9800     | C32—H32C    | 0.9800     |
|            |            |             |            |
| C9—N1—H1A  | 120.3 (18) | C29—N2—H2A  | 121.4 (16) |
| C9—N1—H1B  | 115.9 (17) | C29—N2—H2B  | 117.4 (19) |
| H1A—N1—H1B | 123 (2)    | H2A—N2—H2B  | 121 (3)    |
| C2—C1—C6   | 120.1 (2)  | C22—C21—C26 | 120.3 (2)  |
| C2—C1—H1   | 119.9      | C22—C21—H21 | 119.8      |
| C6—C1—H1   | 119.9      | C26—C21—H21 | 119.8      |
| C3—C2—C1   | 120.1 (2)  | C21—C22—C23 | 120.3 (2)  |
| C3—C2—H2   | 119.9      | C21—C22—H22 | 119.9      |
| C1—C2—H2   | 119.9      | C23—C22—H22 | 119.9      |
| C4—C3—C2   | 119.8 (2)  | C24—C23—C22 | 119.7 (2)  |
| C4—C3—H3   | 120.1      | C24—C23—H23 | 120.1      |
| C2—C3—H3   | 120.1      | C22—C23—H23 | 120.1      |
| C5—C4—C3   | 120.3 (2)  | C23—C24—C25 | 120.3 (2)  |
| C5—C4—H4   | 119.8      | C23—C24—H24 | 119.9      |

|               |             |               |             |
|---------------|-------------|---------------|-------------|
| C3—C4—H4      | 119.8       | C25—C24—H24   | 119.9       |
| C4—C5—C6      | 120.2 (2)   | C26—C25—C24   | 119.99 (19) |
| C4—C5—H5      | 119.9       | C26—C25—H25   | 120.0       |
| C6—C5—H5      | 119.9       | C24—C25—H25   | 120.0       |
| C1—C6—C5      | 119.3 (2)   | C25—C26—C21   | 119.5 (2)   |
| C1—C6—C7      | 120.68 (19) | C25—C26—C27   | 120.32 (18) |
| C5—C6—C7      | 119.98 (18) | C21—C26—C27   | 120.18 (19) |
| F1—C7—C6      | 108.42 (17) | F3—C27—C26    | 108.30 (15) |
| F1—C7—C8      | 109.99 (15) | F3—C27—C28    | 109.80 (16) |
| C6—C7—C8      | 112.43 (17) | C26—C27—C28   | 112.20 (17) |
| F1—C7—H7      | 108.6       | F3—C27—H27    | 108.8       |
| C6—C7—H7      | 108.6       | C26—C27—H27   | 108.8       |
| C8—C7—H7      | 108.6       | C28—C27—H27   | 108.8       |
| F2—C8—C9      | 108.05 (16) | F4—C28—C29    | 108.50 (15) |
| F2—C8—C7      | 108.32 (16) | F4—C28—C30    | 107.77 (16) |
| C9—C8—C7      | 105.39 (15) | C29—C28—C30   | 109.68 (15) |
| F2—C8—C10     | 107.91 (15) | F4—C28—C27    | 107.95 (15) |
| C9—C8—C10     | 110.40 (16) | C29—C28—C27   | 105.52 (16) |
| C7—C8—C10     | 116.49 (17) | C30—C28—C27   | 117.15 (17) |
| O1—C9—N1      | 124.32 (19) | O2—C29—N2     | 124.27 (19) |
| O1—C9—C8      | 117.87 (17) | O2—C29—C28    | 117.93 (17) |
| N1—C9—C8      | 117.81 (18) | N2—C29—C28    | 117.80 (17) |
| C11—C10—C12   | 109.46 (17) | C32—C30—C31   | 109.13 (17) |
| C11—C10—C8    | 110.63 (17) | C32—C30—C28   | 113.31 (16) |
| C12—C10—C8    | 112.65 (18) | C31—C30—C28   | 109.72 (17) |
| C11—C10—H10   | 108.0       | C32—C30—H30   | 108.2       |
| C12—C10—H10   | 108.0       | C31—C30—H30   | 108.2       |
| C8—C10—H10    | 108.0       | C28—C30—H30   | 108.2       |
| C10—C11—H11A  | 109.5       | C30—C31—H31A  | 109.5       |
| C10—C11—H11B  | 109.5       | C30—C31—H31B  | 109.5       |
| H11A—C11—H11B | 109.5       | H31A—C31—H31B | 109.5       |
| C10—C11—H11C  | 109.5       | C30—C31—H31C  | 109.5       |
| H11A—C11—H11C | 109.5       | H31A—C31—H31C | 109.5       |
| H11B—C11—H11C | 109.5       | H31B—C31—H31C | 109.5       |

|               |              |                     |              |
|---------------|--------------|---------------------|--------------|
| C10—C12—H12A  | 109.5        | C30—C32—H32A        | 109.5        |
| C10—C12—H12B  | 109.5        | C30—C32—H32B        | 109.5        |
| H12A—C12—H12B | 109.5        | H32A—C32—H32B       | 109.5        |
| C10—C12—H12C  | 109.5        | C30—C32—H32C        | 109.5        |
| H12A—C12—H12C | 109.5        | H32A—C32—H32C       | 109.5        |
| H12B—C12—H12C | 109.5        | H32B—C32—H32C       | 109.5        |
|               |              |                     |              |
| C6—C1—C2—C3   | -0.4 (4)     | C26—C21—C22—<br>C23 | -0.2 (3)     |
| C1—C2—C3—C4   | 0.0 (4)      | C21—C22—C23—<br>C24 | 0.0 (3)      |
| C2—C3—C4—C5   | 0.3 (3)      | C22—C23—C24—<br>C25 | 0.2 (3)      |
| C3—C4—C5—C6   | -0.3 (3)     | C23—C24—C25—<br>C26 | -0.3 (3)     |
| C2—C1—C6—C5   | 0.4 (3)      | C24—C25—C26—<br>C21 | 0.1 (3)      |
| C2—C1—C6—C7   | -177.8 (2)   | C24—C25—C26—<br>C27 | -178.09 (19) |
| C4—C5—C6—C1   | 0.0 (3)      | C22—C21—C26—<br>C25 | 0.1 (3)      |
| C4—C5—C6—C7   | 178.1 (2)    | C22—C21—C26—<br>C27 | 178.31 (18)  |
| C1—C6—C7—F1   | -146.05 (19) | C25—C26—C27—F3      | -146.64 (18) |
| C5—C6—C7—F1   | 35.8 (3)     | C21—C26—C27—F3      | 35.2 (3)     |
| C1—C6—C7—C8   | 92.1 (2)     | C25—C26—C27—<br>C28 | 92.0 (2)     |
| C5—C6—C7—C8   | -86.0 (2)    | C21—C26—C27—<br>C28 | -86.2 (2)    |
| F1—C7—C8—F2   | -74.5 (2)    | F3—C27—C28—F4       | -73.08 (19)  |
| C6—C7—C8—F2   | 46.5 (2)     | C26—C27—C28—F4      | 47.4 (2)     |
| F1—C7—C8—C9   | 170.07 (16)  | F3—C27—C28—C29      | 171.06 (15)  |
| C6—C7—C8—C9   | -69.0 (2)    | C26—C27—C28—<br>C29 | -68.4 (2)    |
| F1—C7—C8—C10  | 47.3 (2)     | F3—C27—C28—C30      | 48.7 (2)     |
| C6—C7—C8—C10  | 168.25 (18)  | C26—C27—C28—<br>C30 | 169.19 (16)  |
| F2—C8—C9—O1   | -178.51 (17) | F4—C28—C29—O2       | 179.77 (16)  |

|               |             |                 |              |
|---------------|-------------|-----------------|--------------|
| C7—C8—C9—O1   | -62.9 (2)   | C30—C28—C29—O2  | 62.3 (2)     |
| C10—C8—C9—O1  | 63.7 (2)    | C27—C28—C29—O2  | -64.7 (2)    |
| F2—C8—C9—N1   | 0.4 (2)     | F4—C28—C29—N2   | -0.8 (2)     |
| C7—C8—C9—N1   | 116.05 (19) | C30—C28—C29—N2  | -118.28 (19) |
| C10—C8—C9—N1  | -117.4 (2)  | C27—C28—C29—N2  | 114.68 (19)  |
| F2—C8—C10—C11 | -72.9 (2)   | F4—C28—C30—C32  | 53.5 (2)     |
| C9—C8—C10—C11 | 45.0 (2)    | C29—C28—C30—C32 | 171.43 (17)  |
| C7—C8—C10—C11 | 165.09 (18) | C27—C28—C30—C32 | -68.4 (2)    |
| F2—C8—C10—C12 | 50.0 (2)    | F4—C28—C30—C31  | -68.75 (19)  |
| C9—C8—C10—C12 | 167.85 (18) | C29—C28—C30—C31 | 49.2 (2)     |
| C7—C8—C10—C12 | -72.0 (2)   | C27—C28—C30—C31 | 169.37 (16)  |

**Table S32. Hydrogen-bond parameters**

| $D-H\cdots A$       | $D-H$ (Å) | $H\cdots A$ (Å) | $D\cdots A$ (Å) | $D-H\cdots A$ (°) |
|---------------------|-----------|-----------------|-----------------|-------------------|
| $N2-H2A\cdots O2^i$ | 0.89 (3)  | 2.09 (3)        | 2.890 (2)       | 149 (2)           |

Symmetry code(s): (i)  $x+1, y, z$

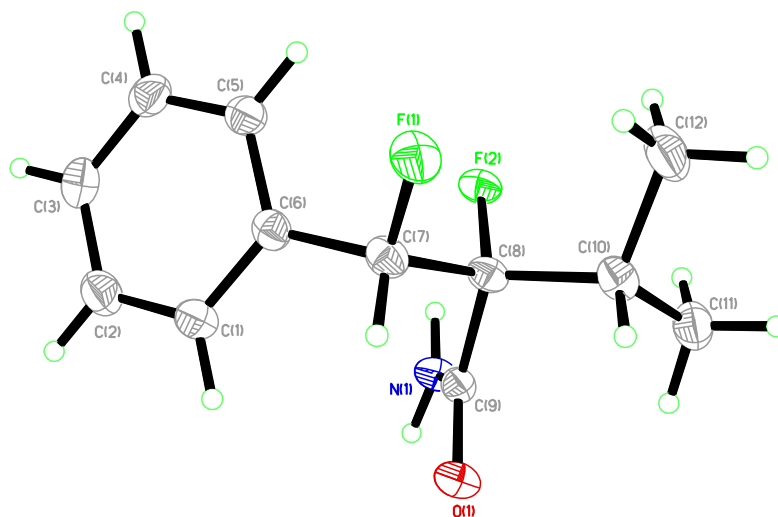

**Figure S14.** Perspective views showing 50% probability displacement

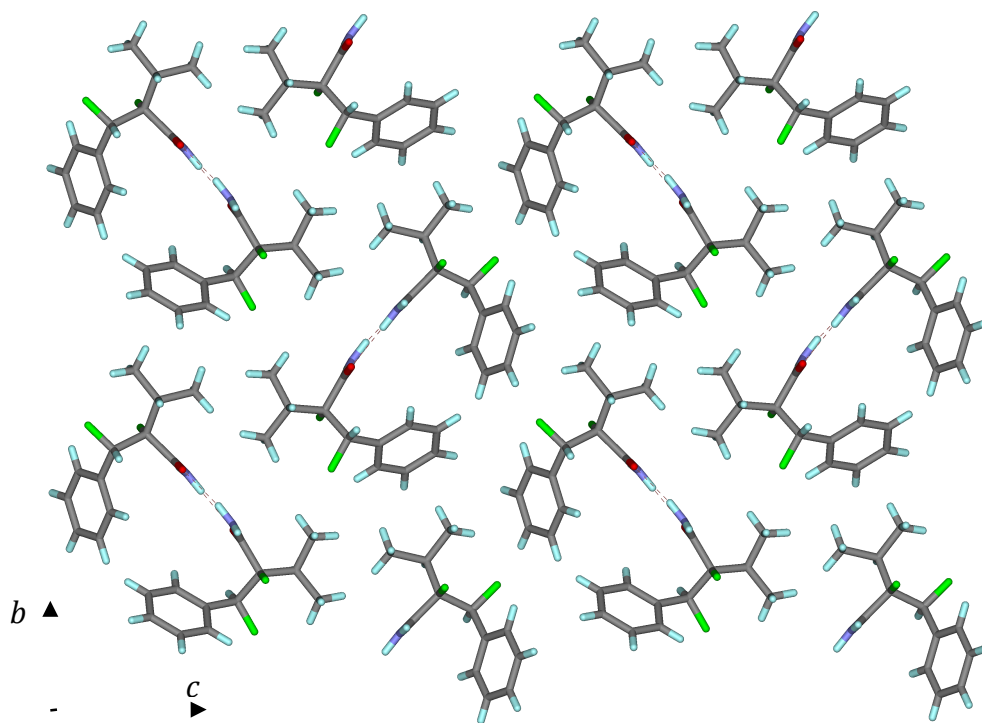

**Figure S15.** Three-dimensional supramolecular architecture viewed along the  $a$ -axis direction.

## Supporting Information References and Notes

1. Kofron, W. G.; Baclawski, L. M. *J. Org. Chem.* **1976**, *41*, 1879–1880.
2. Berliner, M. A.; Cordi, E. M.; Dunetz, J. R.; Price, K. E. *Org. Process Res. Dev.* **2010**, *14*, 180–187.
3. Kasibhatla, S.R.; Bookser, B.C.; Probst, G.; Appleman, J. A.; Erion, M.D. *J. Med. Chem.* **2000**, *43*, 1508–1518.
4. Zakhari, J. S.; Kinoyama, I.; Hixon, M. S.; Di Mola, A.; Globisch, D.; Janda, K. D. *Bioorg. Med. Chem.* **2011**, *19*, 6203–6209.
5. Nishimura, T.; Fushimi, N.; Fujikura, H.; Katsuno, K.; Komatsu, Y.; Isaji, M. Glycopyranosyloxypyrazole Derivatives and Medicinal Use Thereof. WO Patent 2002068439, 2002.
6. Alcalde, E.; Mesquida, N.; Frigola, J.; Lopez-Perez, S.; Merce, R. *Org. Biomol. Chem.* **2008**, *6*, 3795–3810.
7. Rajesh, K.; Somasundaram, M.; Saiganesh, R.; Balasubramanian, K. K. *J. Org. Chem.* **2007**, *72*, 5867–5869.
8. Cant, A. A.; Bhalla, R.; Pimlott, S. L.; Sutherland, A. *Chem. Commun.* **2012**, *48*, 3993–3995.
9. Muhammad, N.; Rehman, Z.-u.; Ali, S.; Meetsma, A. *Acta Crystallogr. Sect. E: Struct. Rep. Online* **2007**, *63*, o2174–o2175.
10. Hoen, R.; Boogers, J. A. F.; Bernsmann, H.; Minnaard, A. J.; Meetsma, A.; Tiemersma-Wegman, T. D.; de Vries, A. H. M.; de Vries, J. G.; Feringa, B. L. *Angew. Chem., Int. Ed.* **2005**, *44*, 4209–4212.
11. Mori, K.; Puapoomchareon, P. *Liebigs Ann. Chem.* **1990**, 159–162.
12. Oppolzer, W.; Barras, J.-P. *Helv. Chim. Acta* **1987**, *70*, 1666–1675.
13. Zuev, V. V.; de Vekki, D. A. *Phosphorus, Sulfur Silicon Relat. Elem.* **2006**, *181*, 2063–2078.
14. Kennedy, A.J.; Mathews, T.P.; Kharel, Y.; Field, S. D.; Moyer, M.L.; East, J.E.; Houck, J.D.; Lynch, K.R.; MacDonald, T.L. *J. Med. Chem.* **2011**, *54*, 3524–3548.
15. Ziegler, K.; Zeiser, H. *Justus Liebigs Ann. Chem.* **1931**, *485*, 174–192.
16. Slow evaporation of a saturated solution of **3j** in diethyl ether at room temperature gave crystals suitable for X-ray diffraction. For a thermal ellipsoid representation of **3j**, see page S40.
17. Qi, J.; Beeler, A.B.; Zhang, Q.; Porco Jr., J. A. *J. Am. Chem. Soc.* **2010**, *132*, 13642–13644.
18. Lin, M.-Y.; Das, A.; Liu, R.-S. *J. Am. Chem. Soc.* **128**, 9340–9341.
19. Biller, S. A.; Magnin, D. R. Bisphosphonate Squalene Synthetase Inhibitors and Method. U.S. 5157027, 1992.
20. Onda, K.; Suzuki, T.; Shiraki, R.; Yonetoku, Y.; Negoro, K.; Momose, K.; Katayama, N.; Orita, M.; Yamaguchi, T.; Ohta, M.; Tsukamoto, S.-i. *Bioorg. Med. Chem.* **2008**, *16*, 5452–5464.
21. Franke, A.; Mattern, G.; Traber, W. *Helv. Chim. Acta* **1975**, *58*, 268–278.
- 22.

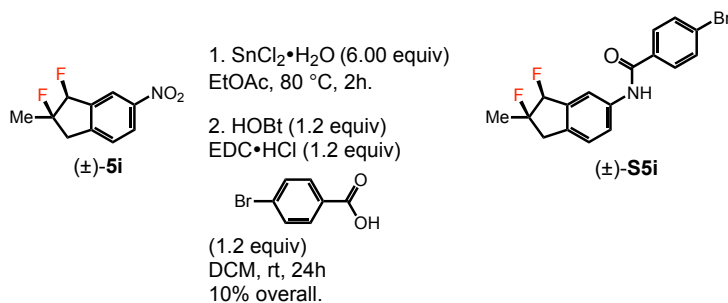

Ethyl acetate (2.3 mL) was added via syringe to a stirred mixture of ( $\pm$ )-**5i** (50.0 mg, 0.230 mmol, 1 equiv) and  $\text{SnCl}_2 \cdot 2 \text{H}_2\text{O}$  (318 mg, 1.38 mmol, 6.00 equiv) at room temperature, and the resulting mixture was stirred for warmed to 80 °C in an oil bath. After 2 hours, the reaction



mixture was cooled to room temperature and diluted with water (2.3 mL). The organic layer was separated, and the aqueous layer was extracted with ethyl acetate (2 × 5 mL). The combined organic layers were dried over anhydrous MgSO<sub>4</sub> and were concentrated under reduced pressure. The residue was dissolved in dichloromethane (2.3 mL) at room temperature, and *N*-hydroxybenzotriazole hydrate (HOBt, 43 mg, 0.28 mmol, 1.2 equiv), 1-ethyl-3-(3-dimethylaminopropyl) carbodiimide hydrogen chloride (EDC•HCl, 54 mg, 0.28 mmol, 1.2 equiv), and 4-bromobenzoic acid (56 mg, 0.28 mmol, 1.2 equiv) were added as solids under a nitrogen atmosphere. The resulting mixture was stirred for 24 hours and was then diluted with water (3 mL). The organic layer was separated and washed sequentially with aqueous HCl solution (1 M, 3 mL), saturated aqueous NaHCO<sub>3</sub> solution (3 mL), and water (3 mL). The organic layer was dried over anhydrous MgSO<sub>4</sub> and was concentrated under reduced pressure. The residue was purified by flash column chromatography on silica gel (0% to 50% diethyl ether in hexanes) to give crude (±)-**S5i** as a solid that was recrystallized twice from dichloromethane to give (±)-**S5i** (8.4 mg, 10%) as colorless crystals suitable for X-Ray diffraction. For a thermal ellipsoid representation of (±)-**S5i**, see page S45. <sup>1</sup>H NMR (500 MHz, Acetone-*d*<sub>6</sub>) δ 9.65 (s, 1H), 8.80 (s, 1H), 7.97–7.94 (m, 2H), 7.77–7.70 (m, 3H), 7.29 (d, *J* = 8.3 Hz, 1H), 5.70 (dd, *J* = 10.7, 54.2 Hz, 1H), 3.28–3.21 (m, 1H), 3.11–3.03 (m, 1H), 1.63 (d, *J* = 22.5 Hz, 3H); <sup>13</sup>C NMR (125.7 MHz, Acetone-*d*<sub>6</sub>) δ 165.4, 139.8 (d, *J* = 18.2 Hz), 139.5, 136.3–136.2 (m), 135.4, 132.5, 130.4, 126.5, 126.4, 122.8 (m), 117.9, 101.8–100.2 (m), 93.9 (dd, *J* = 17.3, 191.8 Hz), 42.4 (d, *J* = 24.0 Hz), 22.2 (d, *J* = 25.9 Hz); <sup>19</sup>F NMR (470.4 MHz, Acetone-*d*<sub>6</sub>) δ -163.5–-163.8 (m, 1F), -194.7 (d, *J* = 54.8 Hz, 1F); FTIR (thin film) ν 3292 (w), 1649 (s), 1535 (s), 1492 (s), 1011 (m) cm<sup>-1</sup>; HRMS (ESI-TOF) Calc'd for C<sub>17</sub>H<sub>14</sub>BrF<sub>2</sub>NO[M+H]<sup>+</sup>: 366.0300; found 366.0301.

23.

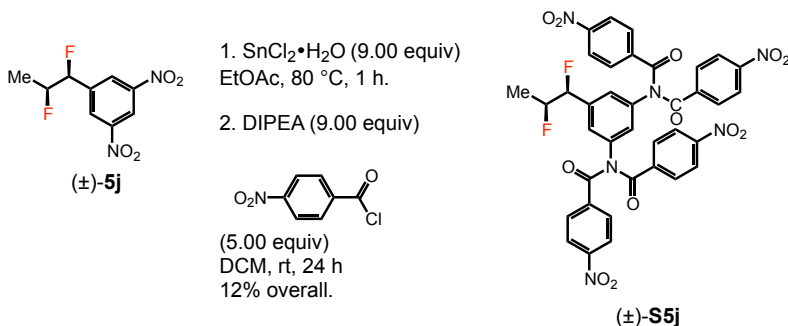

SnCl<sub>2</sub>•2 H<sub>2</sub>O (866 mg, 3.84 mmol, 9.00 equiv) was added under a nitrogen atmosphere to a solution of (±)-**5j** (105 mg, 0.427 mmol, 1 equiv) in ethyl acetate (4.3 mL) at room temperature. The resulting slurry was placed in an oil bath and warmed to 80 °C. After 1 hour, the reaction mixture was allowed to cool to room temperature and was poured into water (60 mL). K<sub>2</sub>CO<sub>3</sub> was added until the pH of the aqueous layer was 9. The layers were separated, and the aqueous layer was extracted with ethyl acetate (60 mL). The combined organic layers were dried over anhydrous Na<sub>2</sub>SO<sub>4</sub>, were filtered through a short plug of silica, and were concentrated under reduced pressure to give the crude dianiline product (102 mg) as a light yellow oil. The crude dianiline (20.0 mg, 0.107 mmol, 1 equiv) was dissolved in dichloromethane (1 mL) at room temperature, and diisopropylethylamine (DIPEA, 169 μL, 0.967 mmol, 9.00 equiv) was added via syringe. 4-Nitrobenzoyl chloride (100 mg, 0.537 mmol, 5.00 equiv) was added as a solid under a nitrogen atmosphere. After 2 hours, ethyl acetate (30 mL) was added. The organic layer was washed sequentially with aqueous HCl solution (1 M, 2 15 mL), saturated aqueous NaHCO<sub>3</sub> solution (15 mL), and brine (15 mL). The organic layer was dried over anhydrous Na<sub>2</sub>SO<sub>4</sub>, was filtered, and was concentrated under reduced pressure. The residue was purified by flash column

---

chromatography on silica gel (0 to 30% ethyl acetate in hexanes) to give diimide ( $\pm$ )-**S5j** (9.9 mg, 12%) as a white solid. Slow evaporation of a solution of ( $\pm$ )-**S5j** in 3:1 hexanes:ethyl acetate gave crystals suitable for X-ray diffraction. For a thermal ellipsoid representation of ( $\pm$ )-**S5j**, see page S56.

24. Sundberg, R. J. *J. Org. Chem.* **1965**, *30*, 3604–3610.

25. A suspension of ( $\pm$ )-**5l** in 2:1 hexanes:dichloromethane was heated to reflux in a sealed 20 mL scintillating vial, and the resulting homogeneous mixture was allowed to cool slowly to room temperature to give crystals suitable for X-ray diffraction. For a thermal ellipsoid representation of ( $\pm$ )-**5l**, see page S65.

26. Crosignani, S.; Prêtre, A.; Jorand-Lebrun, C.; Fraboulet, G.; Seenisamy, J.; Augustine, J. K.; Missotten, M.; Humbert, Y.; Cleva, C.; Abia, N.; Daff, H.; Schott, O.; Schneider, M.; Burgat-Charvillon, F.; Rivron, D.; Hamernig, I.; Arrighi, J.-F.; Gaudet, M.; Zimmerli, S. C.; Juillard, P.; Johnson, Z. *J. Med. Chem.* **2011**, *54*, 7299–7317.

27. Slow evaporation of a saturated solution of ( $\pm$ )-**5m** in isopropyl alcohol at room temperature gave crystals suitable for X-ray diffraction. For a thermal ellipsoid representation of ( $\pm$ )-**5m**, see page S69.

28. Tsuneo, Y.; Ujikawa, O. Nitrogenated 5-Membered Heterocyclic Compound. WO 2009128481, 2009.

29. Slow evaporation of a saturated solution of ( $\pm$ )-**5s** in diethyl ether at room temperature gave crystals suitable for X-ray diffraction. For a thermal ellipsoid representation of ( $\pm$ )-**5s**, see page S73.

30. Zhang, W.; Haskins, C. W.; Yang, Y.; Dai, M. *Org. Biomol. Chem.* **2014**, *12*, 9109–9112.

31. Vapor diffusion of pentane into a solution of ( $\pm$ )-**7a** in ethyl acetate at room temperature gave crystals suitable for X-ray diffraction. For a thermal ellipsoid representation of ( $\pm$ )-**7a**, see page S78.

32. Azobisisobutyronitrile (0.3 mg, 2  $\mu$ mol, 0.05 equiv) was added under a nitrogen atmosphere to a solution of ( $\pm$ )-**7b** (10.0 mg, 36.0  $\mu$ mol, 1 equiv) and tri-*n*-butylstannane (10.6  $\mu$ L, 40.0  $\mu$ mol, 1.10 equiv) in toluene (3.0 mL) at room temperature. The resulting solution was placed in an oil bath and warmed to 105 °C. After 16 h, the reaction mixture was allowed to cool to room temperature. Flash column chromatography on silica gel (0 to 40% ethyl acetate in hexanes) gave ( $\pm$ )-**7a** (1.4 mg, 20%). See page S30 for characterization data for ( $\pm$ )-**7a**.

33. Vapor diffusion of water into a solution of ( $\pm$ )-**7c** in isopropyl alcohol at room temperature gave crystals suitable for X-ray diffraction. For a thermal ellipsoid representation of ( $\pm$ )-**7c**, see page S82.

34. Takematsu, T.; Takeuchi, Y.; Hiraishi, K.; Nishimura, S. JP 63154649, 1988.

35. Vapor diffusion of pentane into a solution of ( $\pm$ )-**7f** in chloroform at room temperature gave crystals suitable for X-ray diffraction. For a thermal ellipsoid representation of ( $\pm$ )-**7f**, see page S87.

36. Otake, K.; Azukizawa, S.; Fukui, M.; Kunishiro, K.; Kamemoto, H.; Kanda, M.; Miike, T.; Kasai, M.; Shirahase, H. *Bioorg. Med. Chem.* **2012**, *20*, 1060–1075.

37. Vapor diffusion of pentane into a solution of ( $\pm$ )-**7g** in diethyl ether at room temperature gave crystals suitable for X-ray diffraction. For a thermal ellipsoid representation of ( $\pm$ )-**7g**, see page S93.

38. Sandrock, D. L.; Jean-Gérard, L.; Chen, C.-y.; Dreher, S. D.; Molander, G. A. *J. Am. Chem. Soc.*, **2010**, *132*, 17108–17110.

39. Klein, J. *Tetrahedron* **1964**, *20*, 465–479.

40. Vapor diffusion of pentane into a solution of ( $\pm$ )-**7k** in chloroform at room temperature gave crystals suitable for X-ray diffraction. For a thermal ellipsoid representation of ( $\pm$ )-**7k**, see page S97.

- 
- 41 . Slow evaporation of (+)-**7c** from diethyl ether at room temperature gave crystals suitable for X-ray diffraction. For a thermal ellipsoid representation of (+)-**7c**, see page S101.
42. Gaussian 09, Revision A.02, Frisch, M. J.; Trucks, G. W.; Schlegel, H. B.; Scuseria, G. E.; Robb, M. A.; Cheeseman, J. R.; Scalmani, G.; Barone, V.; Mennucci, B.; Petersson, G. A.; Nakatsuji, H.; Caricato, M.; Li, X.; Hratchian, H. P.; Izmaylov, A. F.; Bloino, J.; Zheng, G.; Sonnenberg, J. L.; Hada, M.; Ehara, M.; Toyota, K.; Fukuda, R.; Hasegawa, J.; Ishida, M.; Nakajima, T.; Honda, Y.; Kitao, O.; Nakai, H.; Vreven, T.; Montgomery Jr., J. A.; Peralta, J. E.; Ogliaro, F.; Bearpark, M.; Heyd, J. J.; Brothers, E.; Kudin, K. N.; Staroverov, V. N.; Kobayashi, R.; Normand, J.; Raghavachari, K.; Rendell, A.; Burant, J. C.; Iyengar, S. S.; Tomasi, J.; Cossi, M.; Rega, N.; Millam, J. M.; Klene, M.; Knox, J. E.; Cross, J. B.; Bakken, V.; Adamo, C.; Jaramillo, J.; Gomperts, R.; Stratmann, R. E.; Yazyev, O.; Austin, A. J.; Cammi, R.; Pomelli, C.; Ochterski, J. W.; Martin, R. L.; Morokuma, K.; Zakrzewski, V. G.; Voth, G. A.; Salvador, P.; Dannenberg, J. J.; Dapprich, S.; Daniels, A. D.; Farkas, O.; Foresman, J. B.; Ortiz, J. V.; Cioslowski, J.; Fox, D. J. Gaussian, Inc., Wallingford CT, 2009.
43. CYLview, 1.0b; Legault, C. Y. Université de Sherbrooke, 2009 (<http://www.cylview.org>).
44. Bruker AXS APEX II, Bruker AXS, Madison, Wisconsin, 2014.
45. Sheldrick, G. M. *Acta Cryst., Sect. A: Found. Crystallogr.* **2015**, *71*, 3–8.
46. Sheldrick, G. M. *Acta Cryst., Sect. C: Cryst. Struct. Commun.* **2015**, *71*, 3–8.
47. Dolomanov, O. V.; Bourhis, L. J.; Gildea, R. J.; Howard, J. A. K.; Puschmann, H. *J. Appl. Cryst.* **2009**, *42*, 339–341.
48. Accelrys DS Visualizer v2.0.1, Accelrys Software. Inc., 2007.

## **$^1\text{H}$ , $^{13}\text{C}$ , and $^{19}\text{F}$ NMR Spectra of Substrates, Catalysts, and 1,2-Difluorination Products**

**<sup>1</sup>H NMR**  
**500 MHz**  
**CDCl<sub>3</sub>**

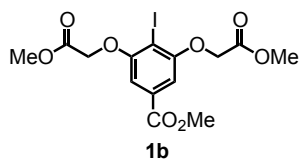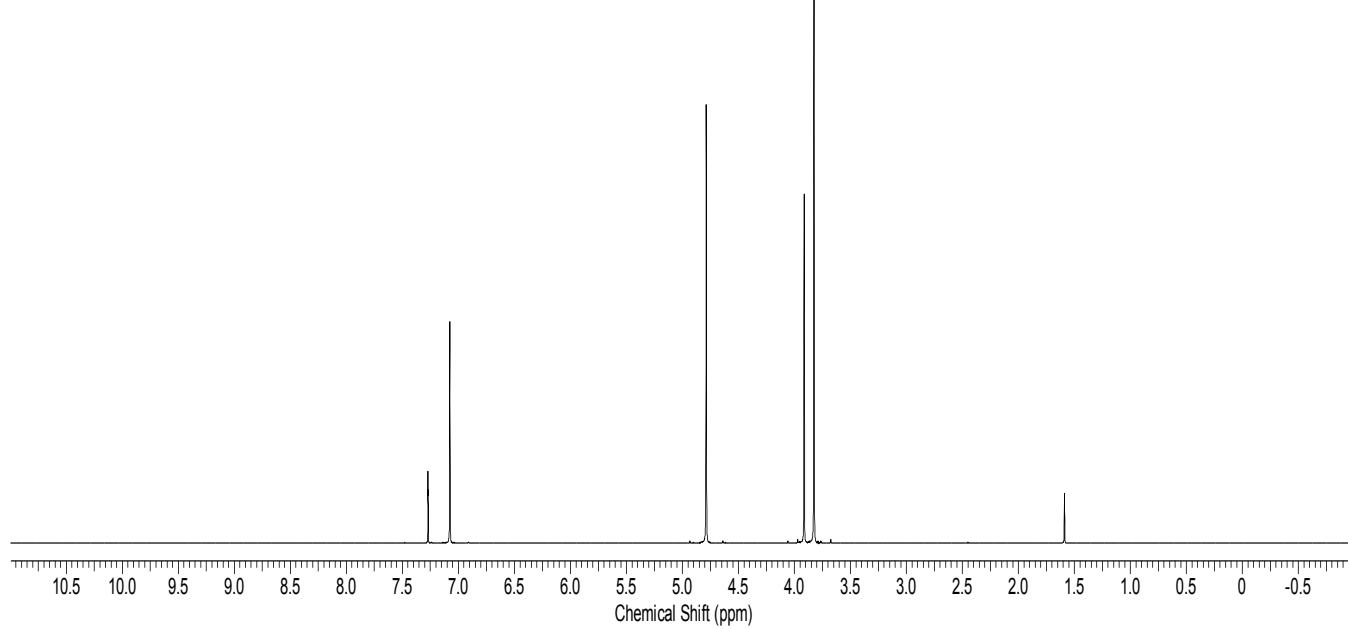

**<sup>13</sup>C NMR**  
**500 MHz**  
**CDCl<sub>3</sub>**

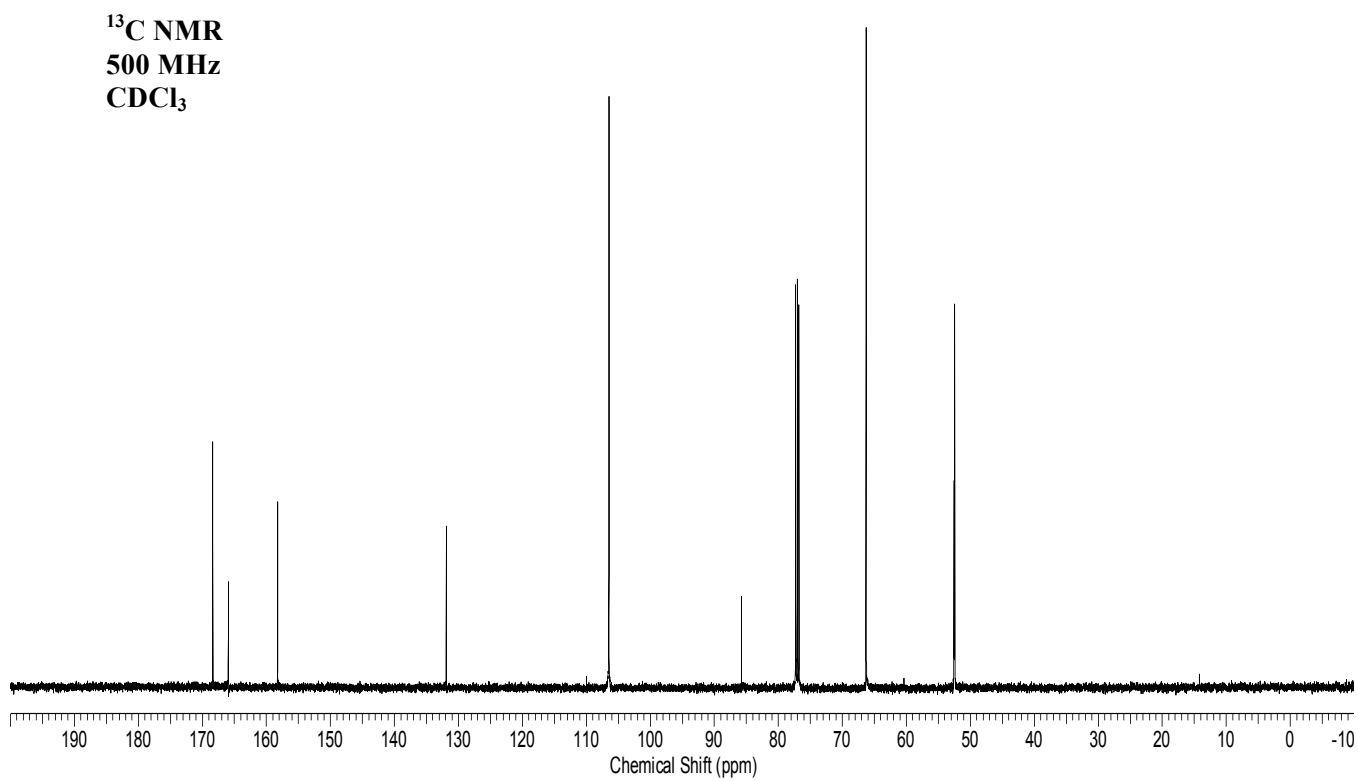

**<sup>1</sup>H NMR**  
**500 MHz**  
**CDCl<sub>3</sub>**

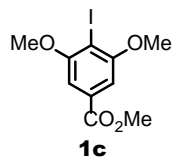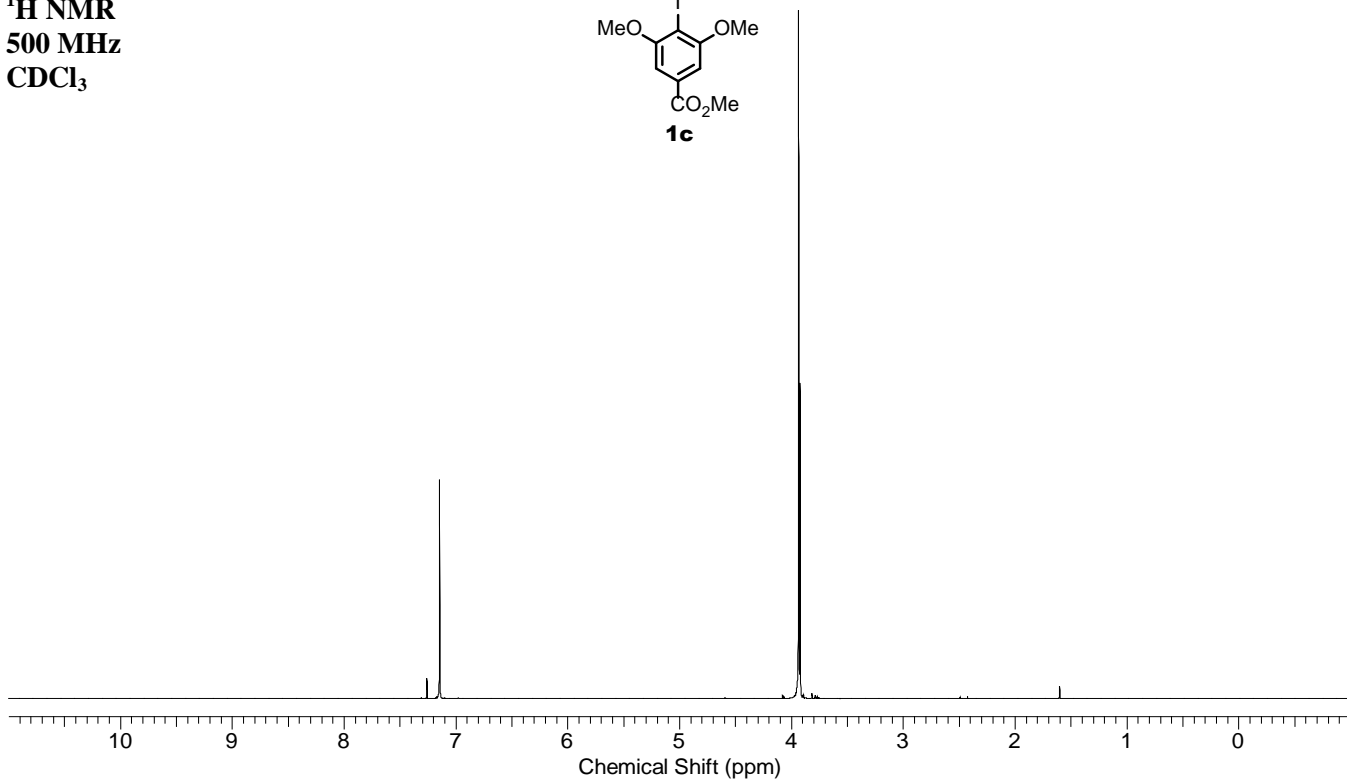

**<sup>13</sup>C NMR**  
**125.7 MHz**  
**CDCl<sub>3</sub>**

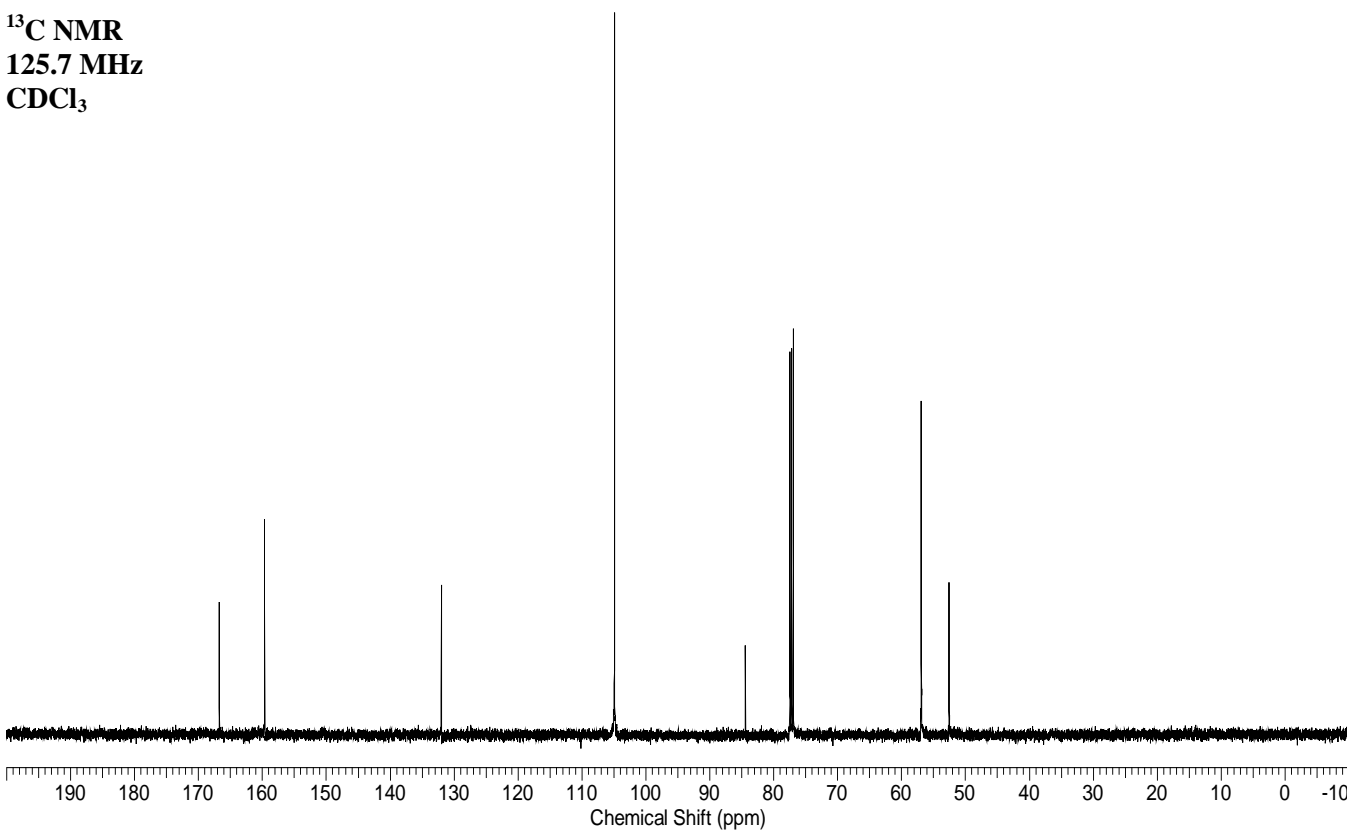

**<sup>1</sup>H NMR**  
**500 MHz**  
**CDCl<sub>3</sub>**

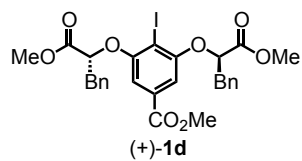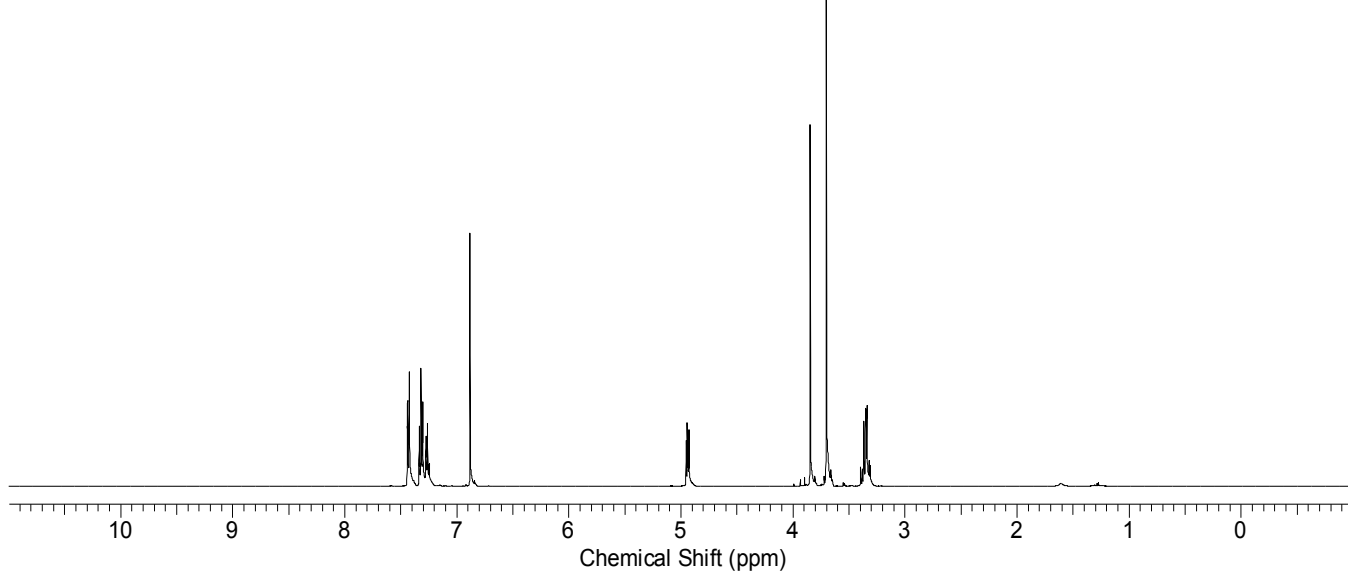

**<sup>13</sup>C NMR**  
**125.7 MHz**  
**CDCl<sub>3</sub>**

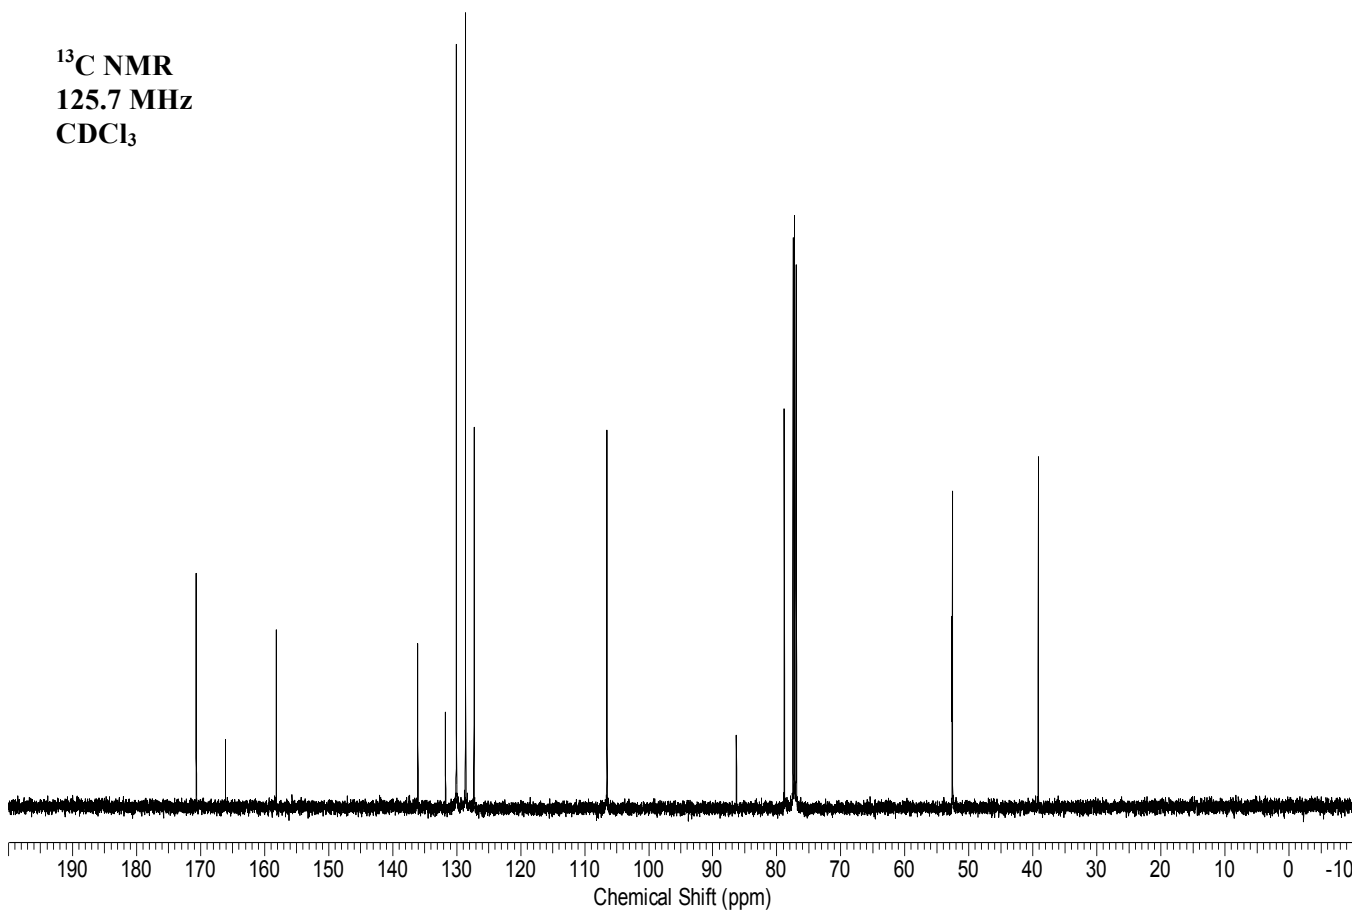

**<sup>1</sup>H NMR**  
**500 MHz**  
**CDCl<sub>3</sub>**

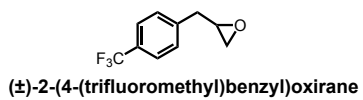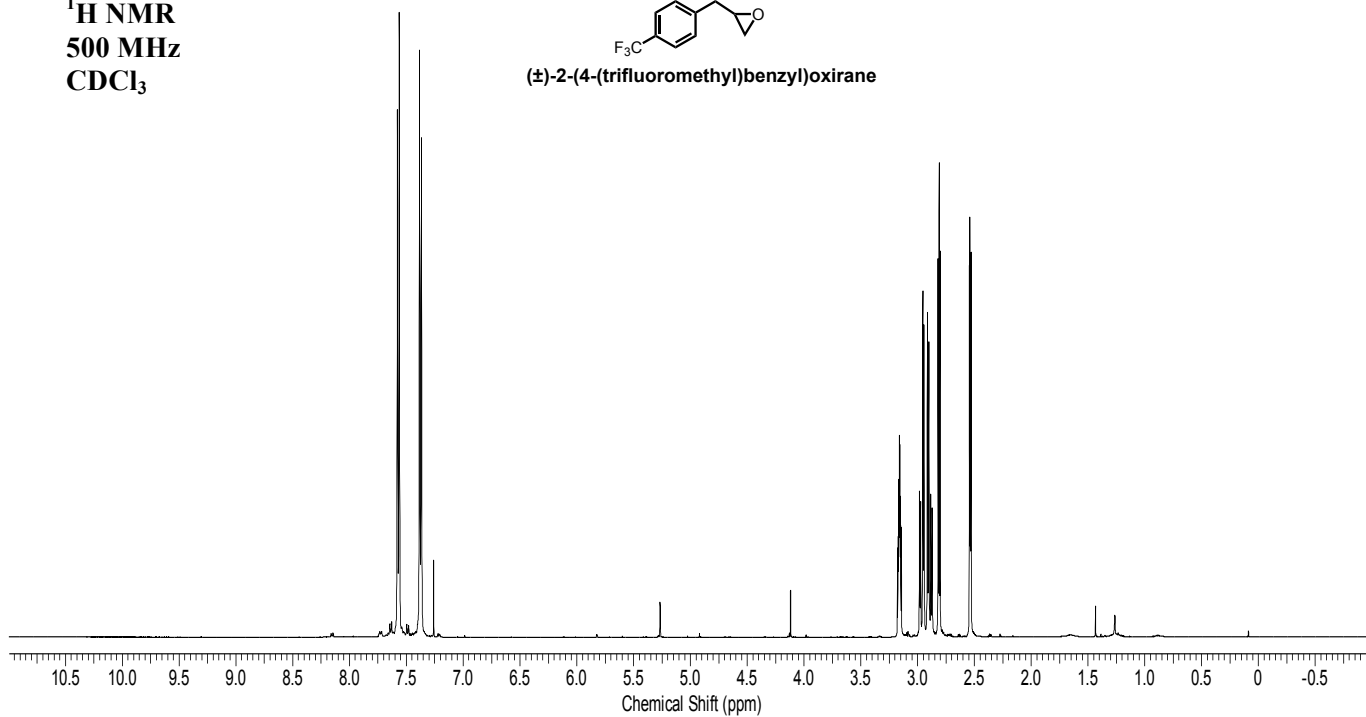

**<sup>13</sup>C NMR**  
**125.7 MHz**  
**CDCl<sub>3</sub>**

**<sup>19</sup>F NMR**  
**470.4 MHz**  
**CDCl<sub>3</sub>**

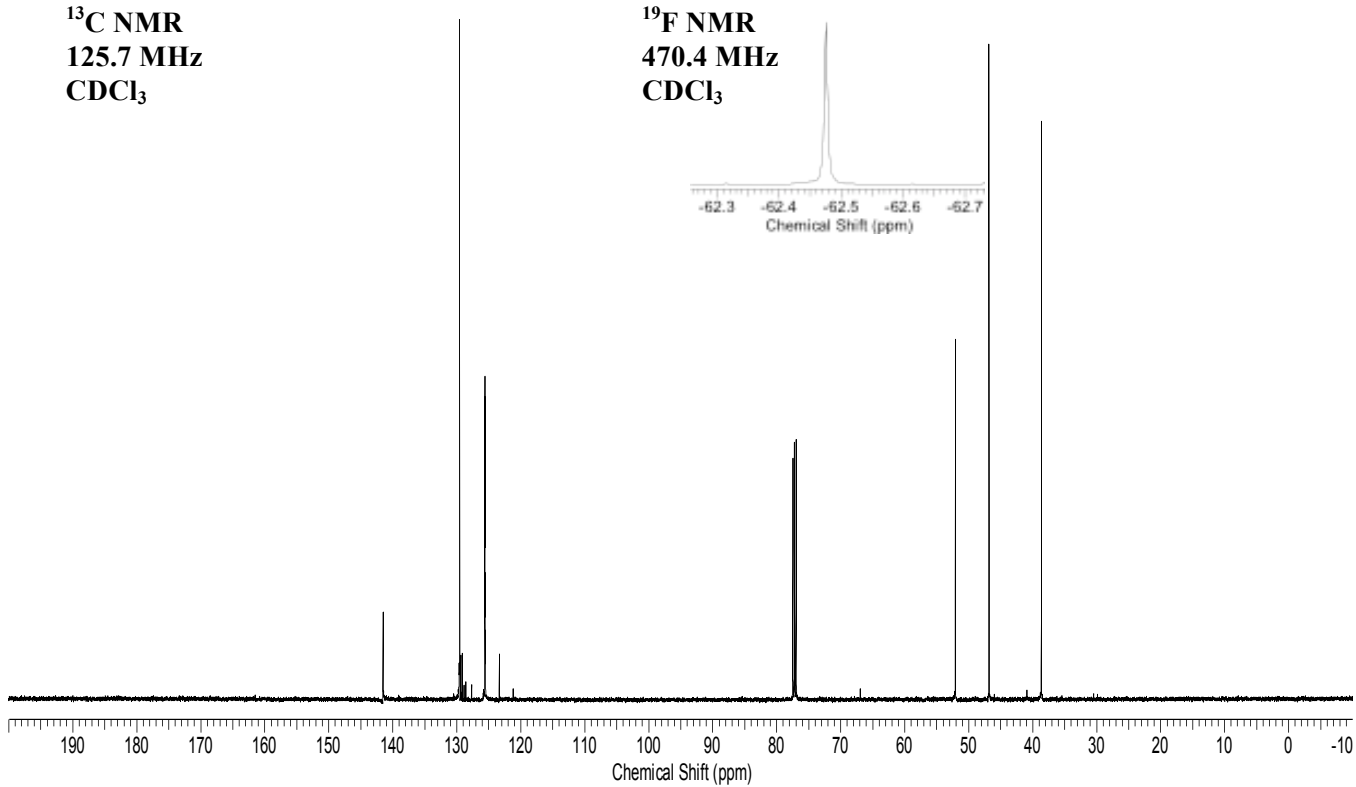



**<sup>1</sup>H NMR**  
**500 MHz**  
**CDCl<sub>3</sub>**

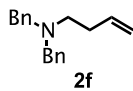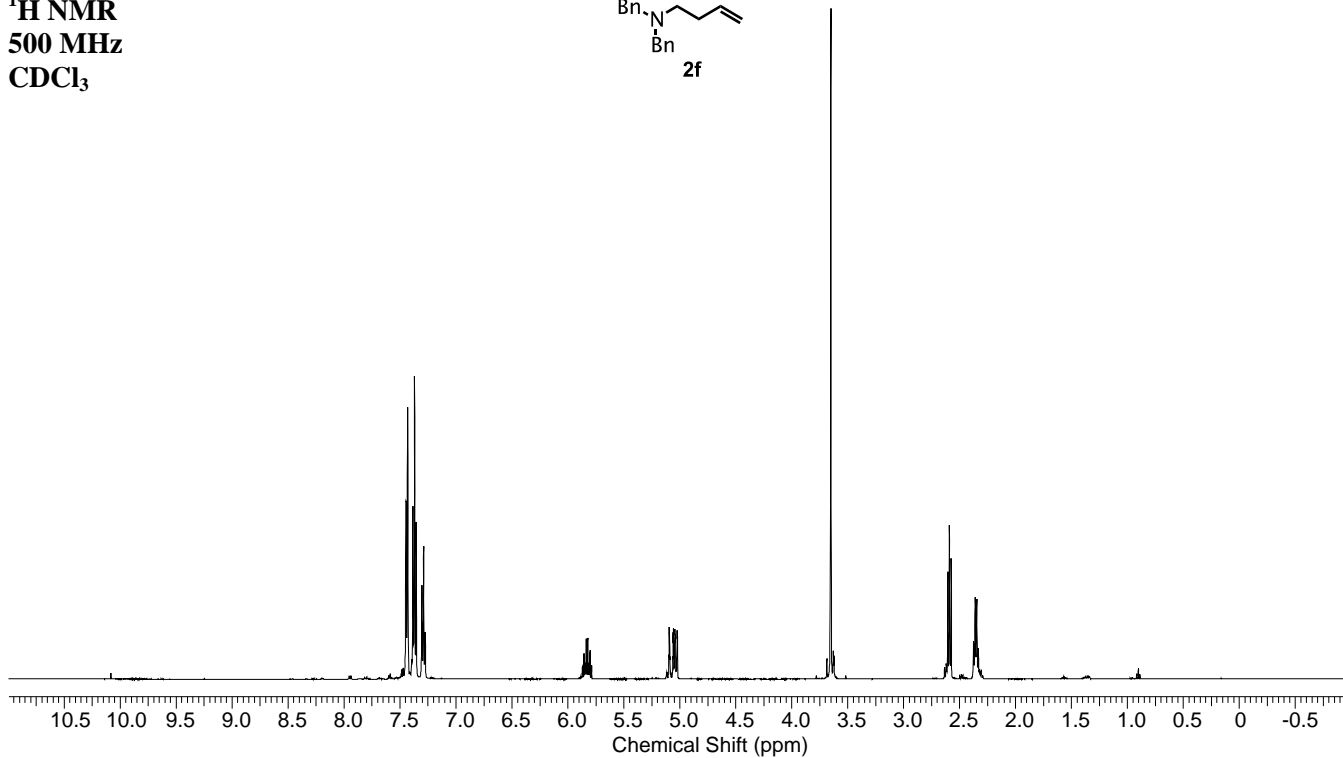

**<sup>13</sup>C NMR**  
**125.7 MHz**  
**CDCl<sub>3</sub>**

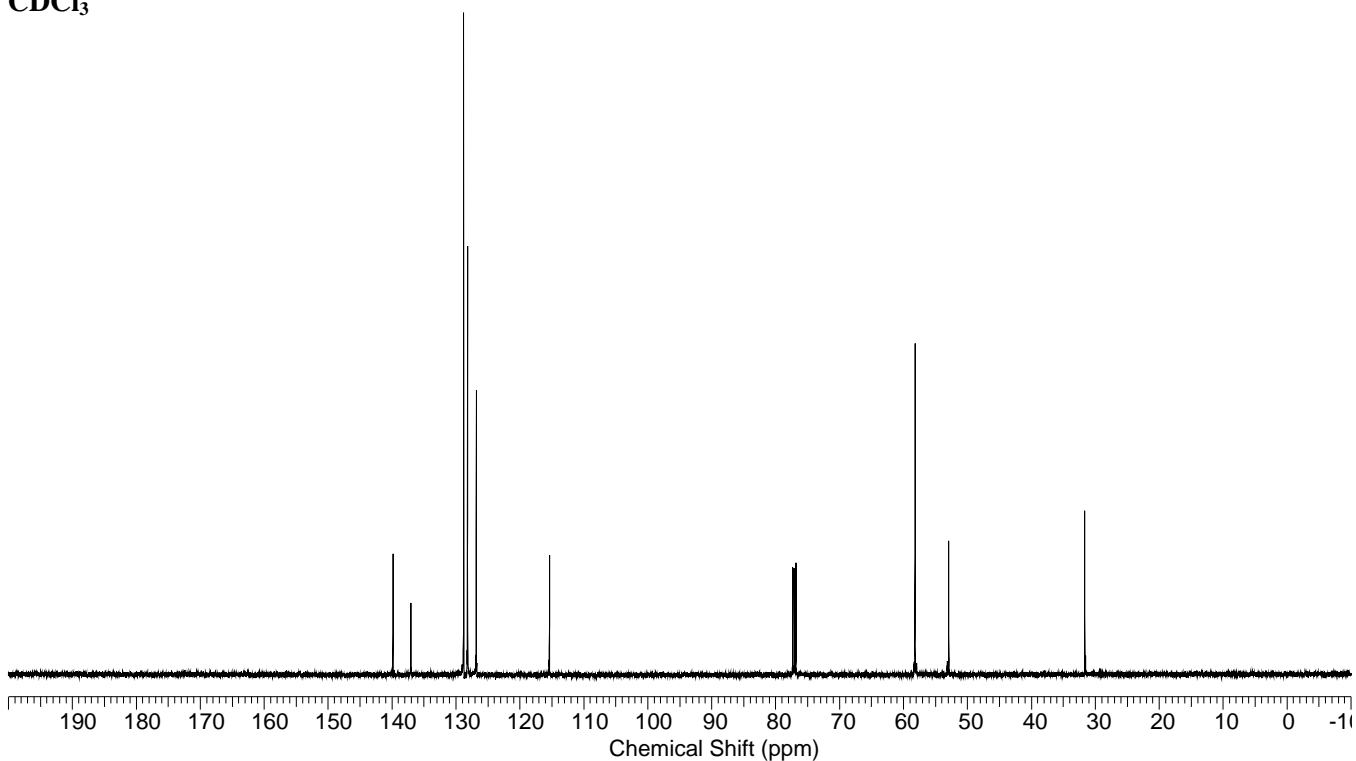

**<sup>1</sup>H NMR**  
**500 MHz**  
**CDCl<sub>3</sub>**

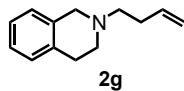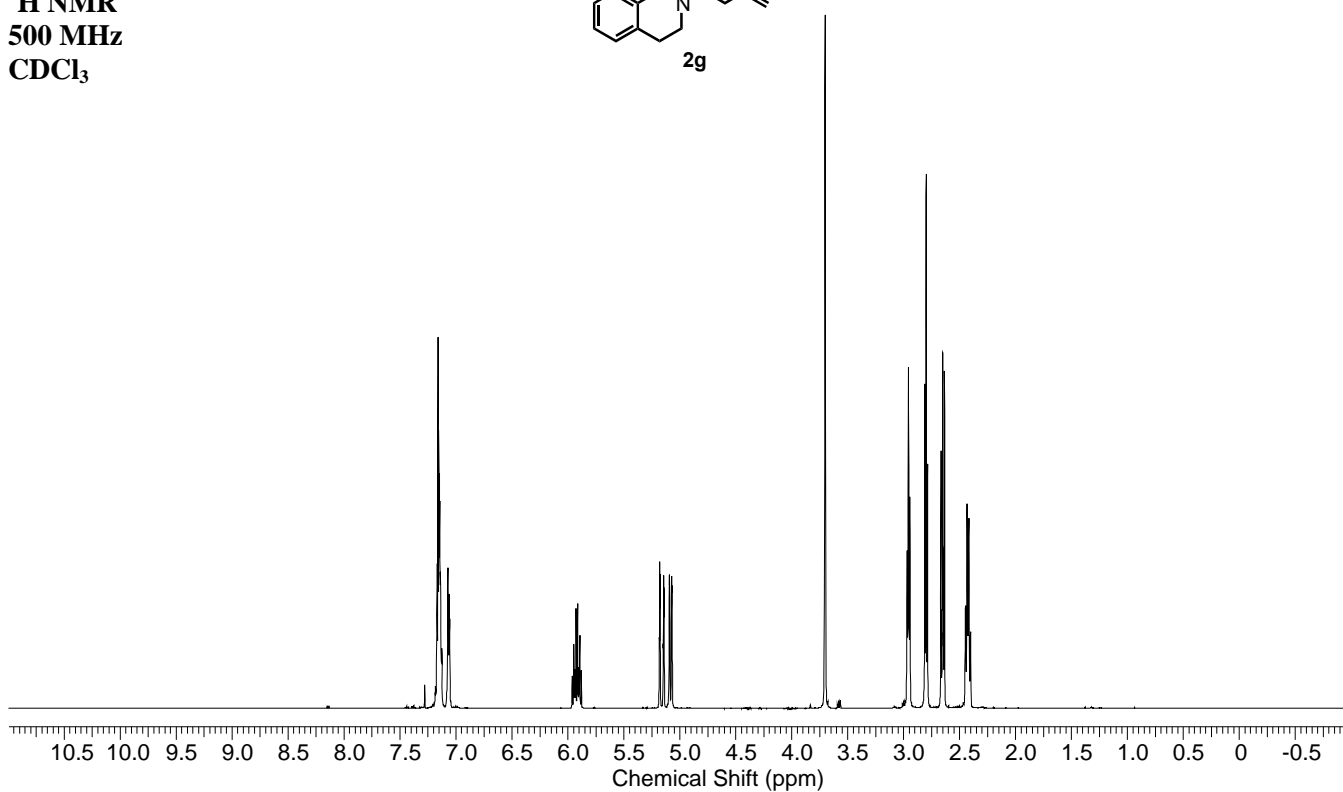

**<sup>13</sup>C NMR**  
**125.7 MHz**  
**CDCl<sub>3</sub>**

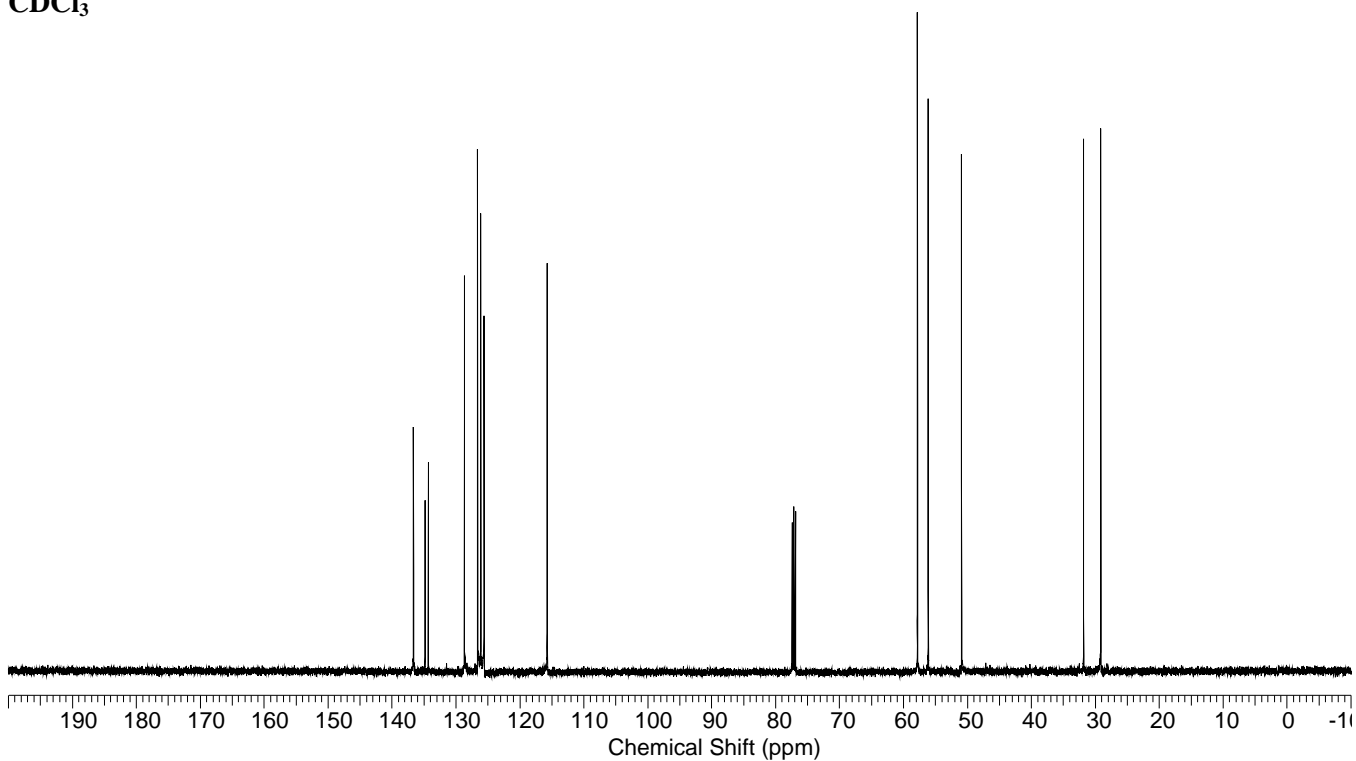

**<sup>1</sup>H NMR**  
**500 MHz**  
**CDCl<sub>3</sub>**

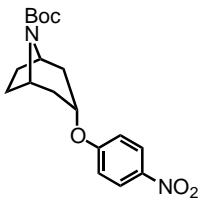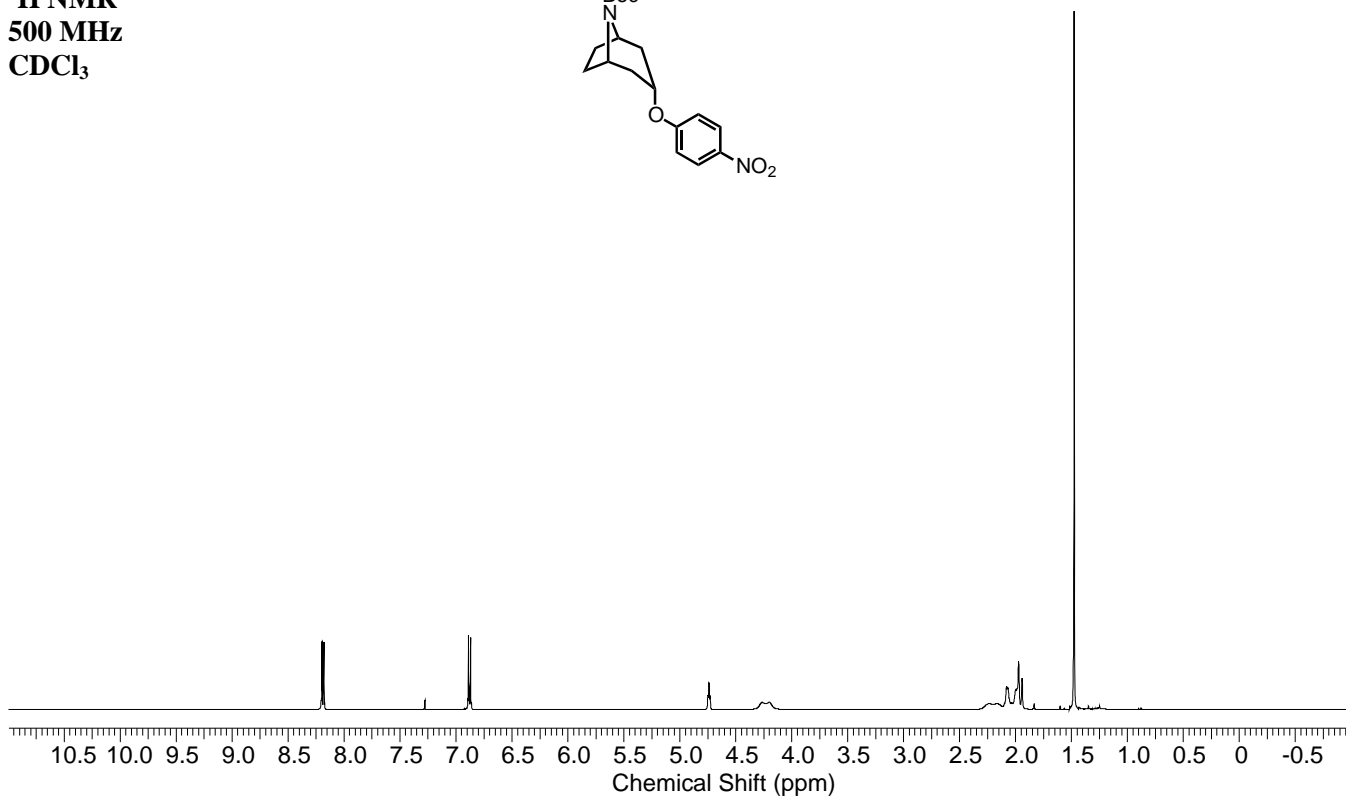

**<sup>13</sup>C NMR**  
**125.7 MHz**  
**CDCl<sub>3</sub>**

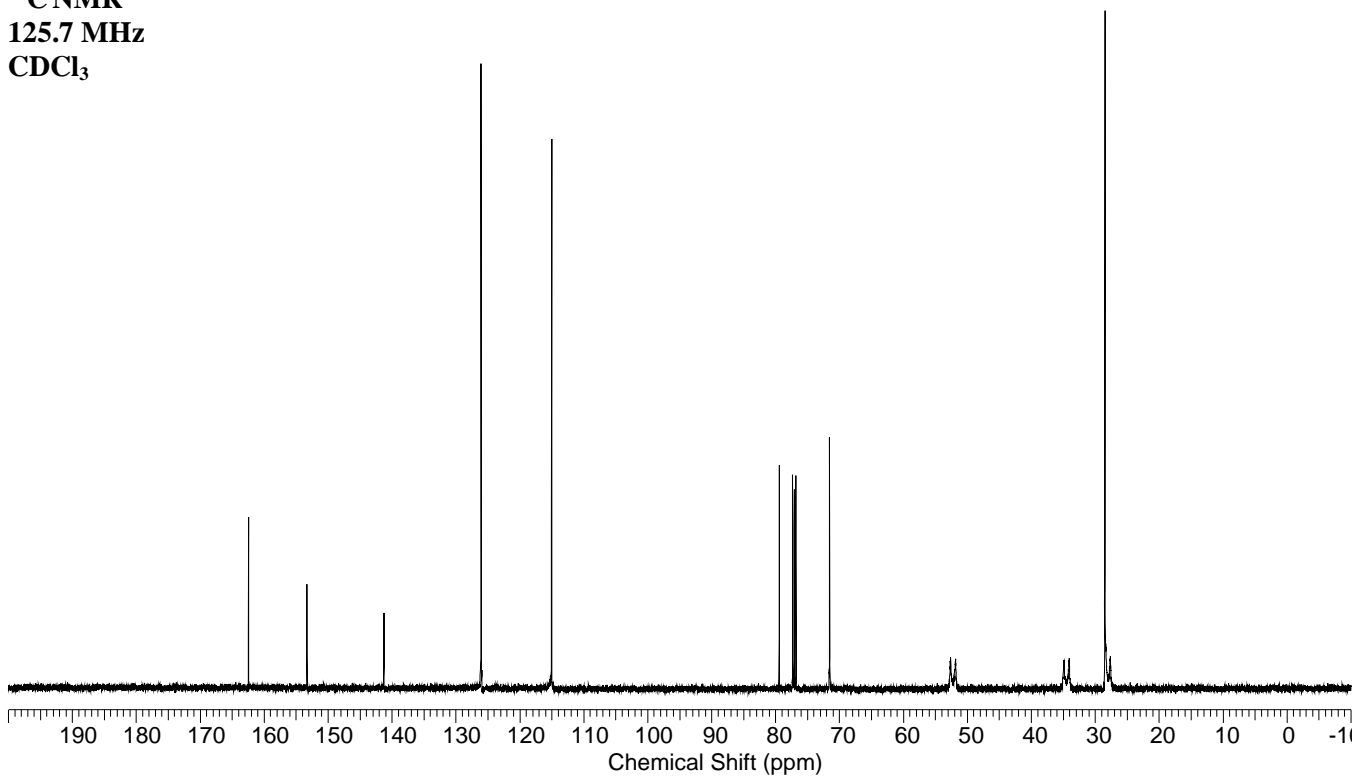

**<sup>1</sup>H NMR**  
**500 MHz**  
**CDCl<sub>3</sub>**

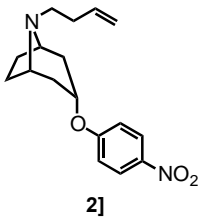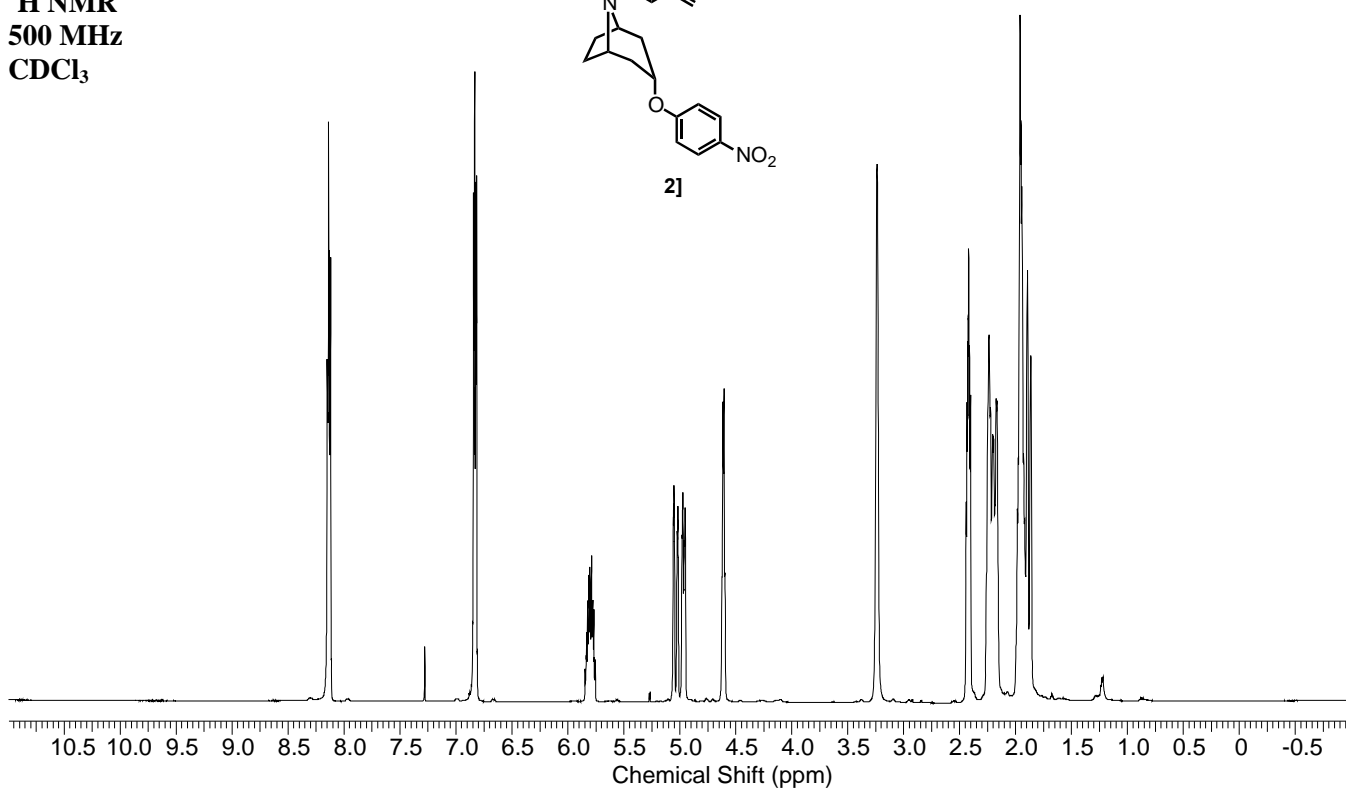

**<sup>13</sup>C NMR**  
**125.7 MHz**  
**CDCl<sub>3</sub>**

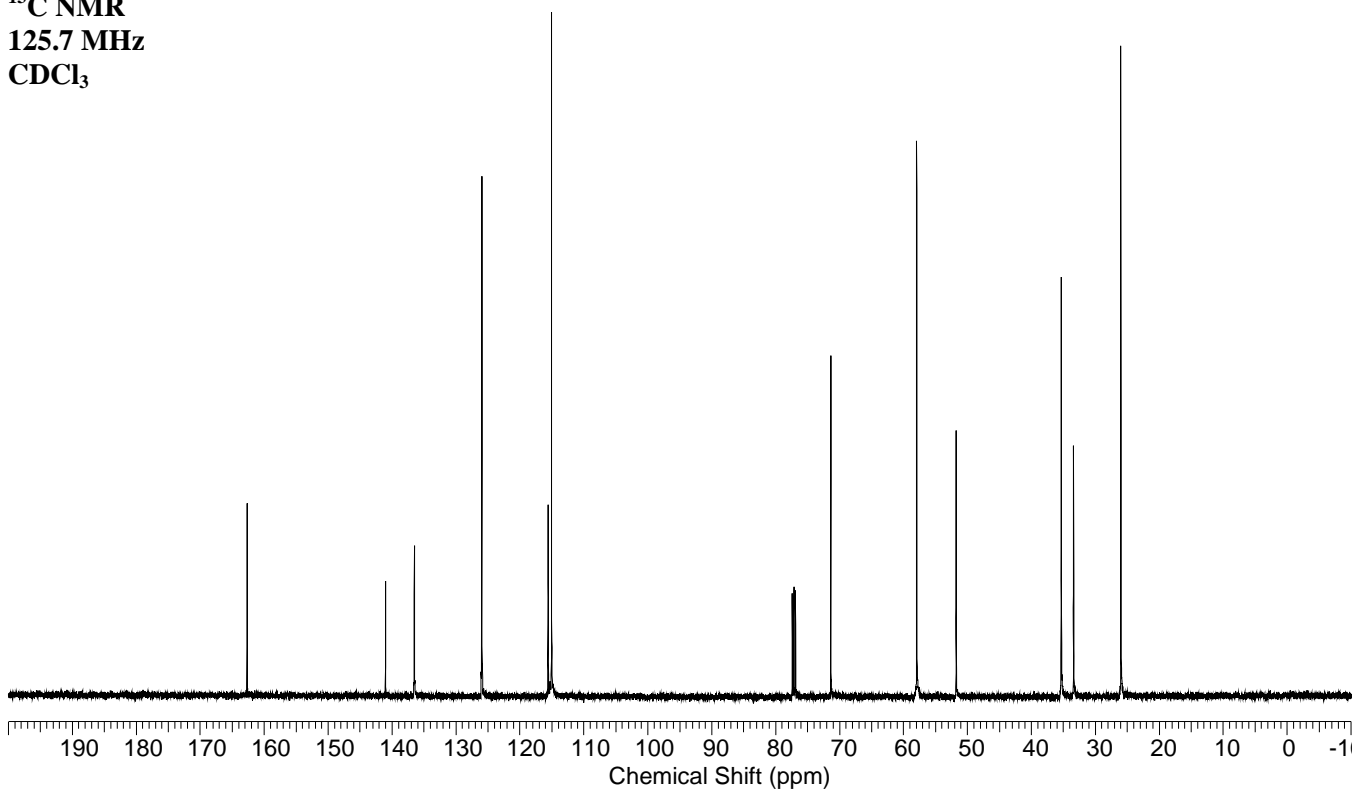

**<sup>1</sup>H NMR**  
**500 MHz**  
**CDCl<sub>3</sub>**

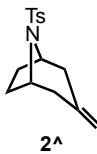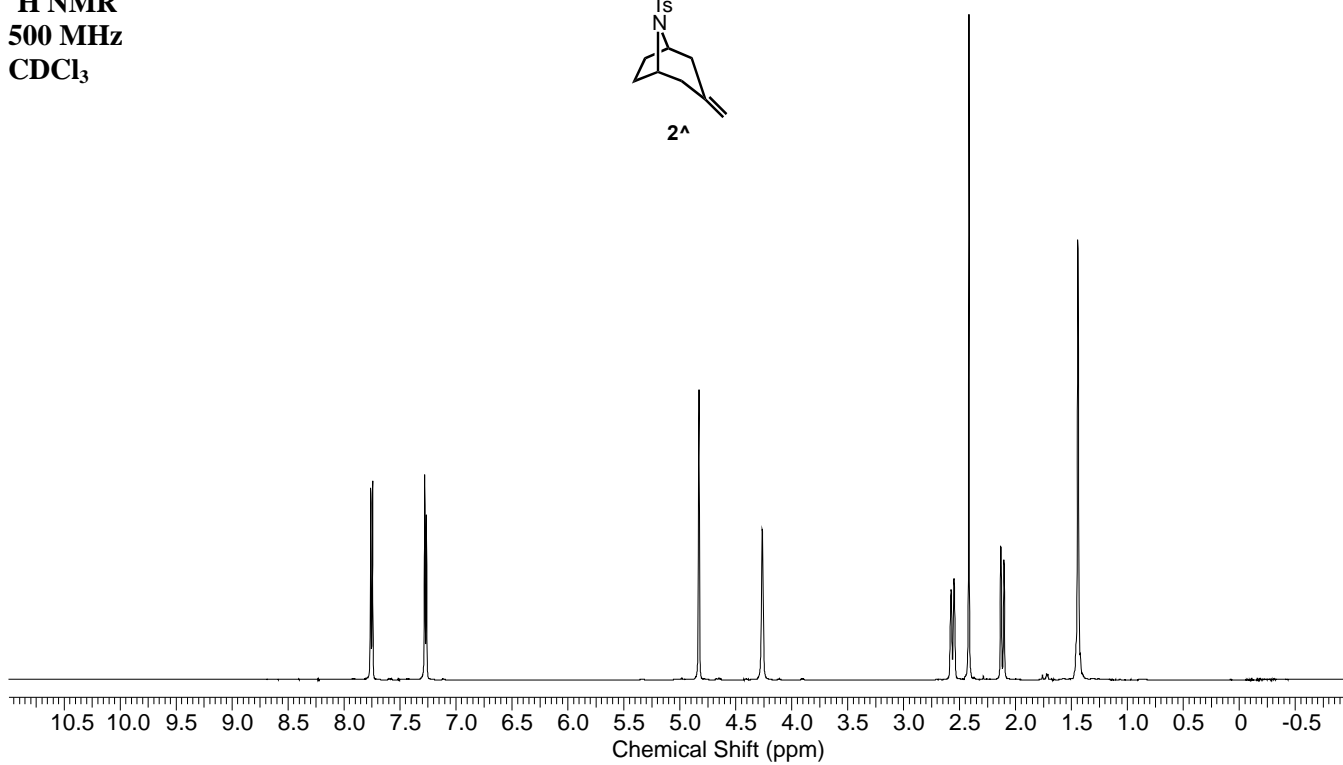

**<sup>13</sup>C NMR**  
**125.7 MHz**  
**CDCl<sub>3</sub>**

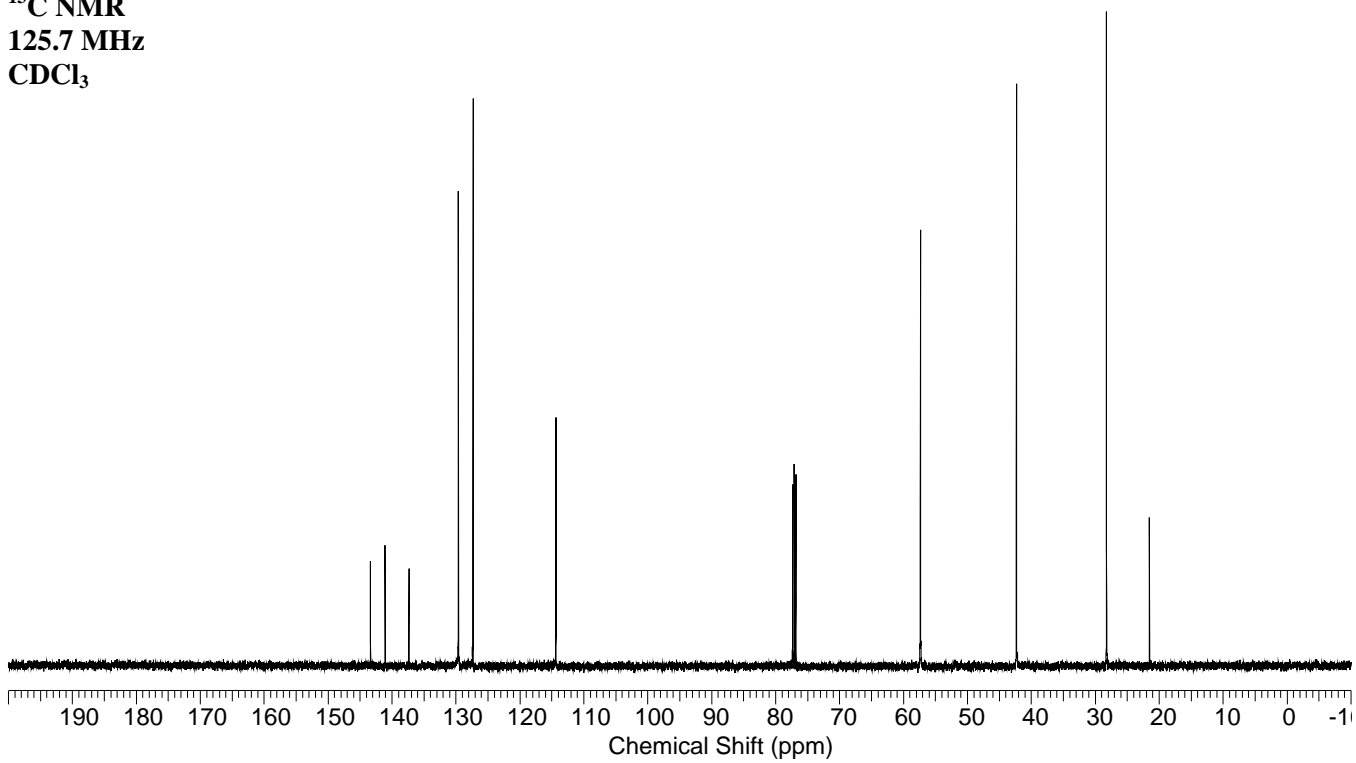

**<sup>1</sup>H NMR**  
**500 MHz**  
**CDCl<sub>3</sub>**

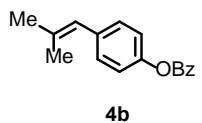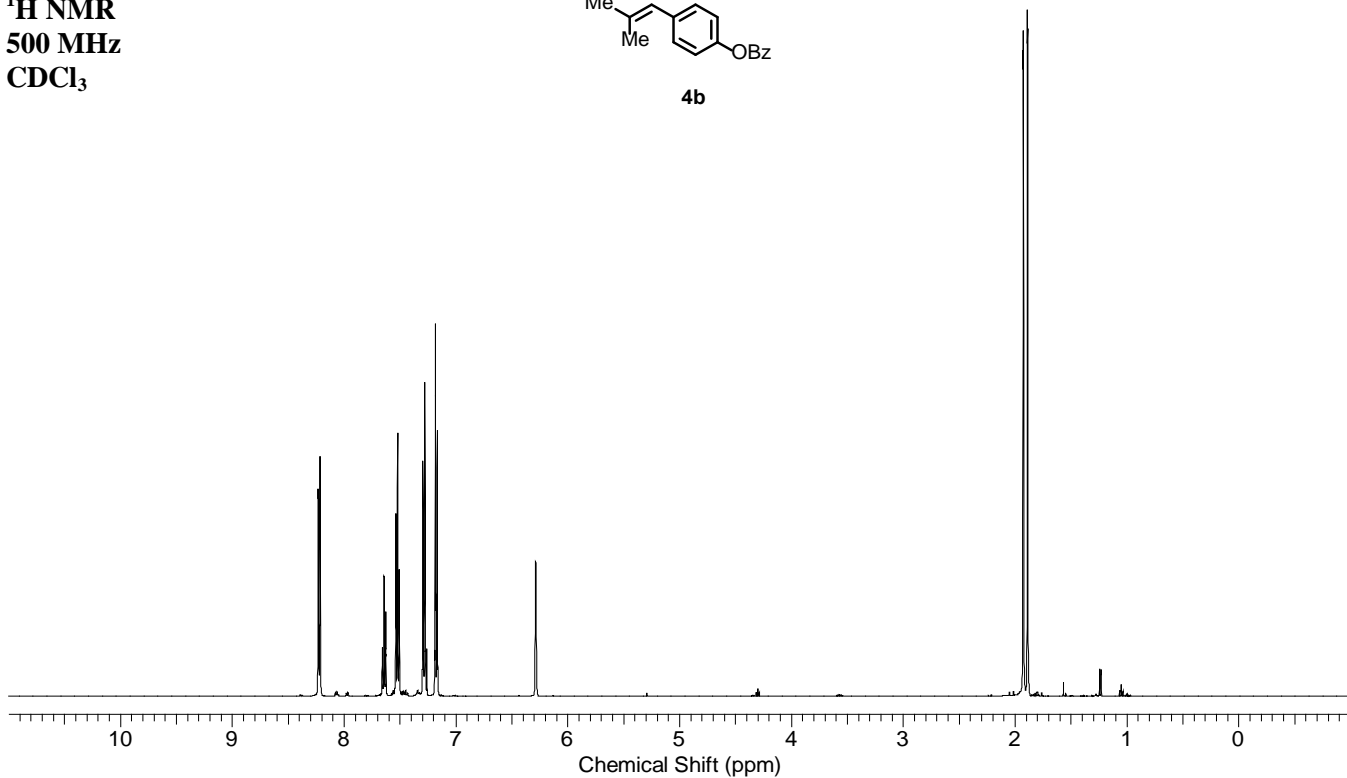

**<sup>13</sup>C NMR**  
**125.7 MHz**  
**CDCl<sub>3</sub>**

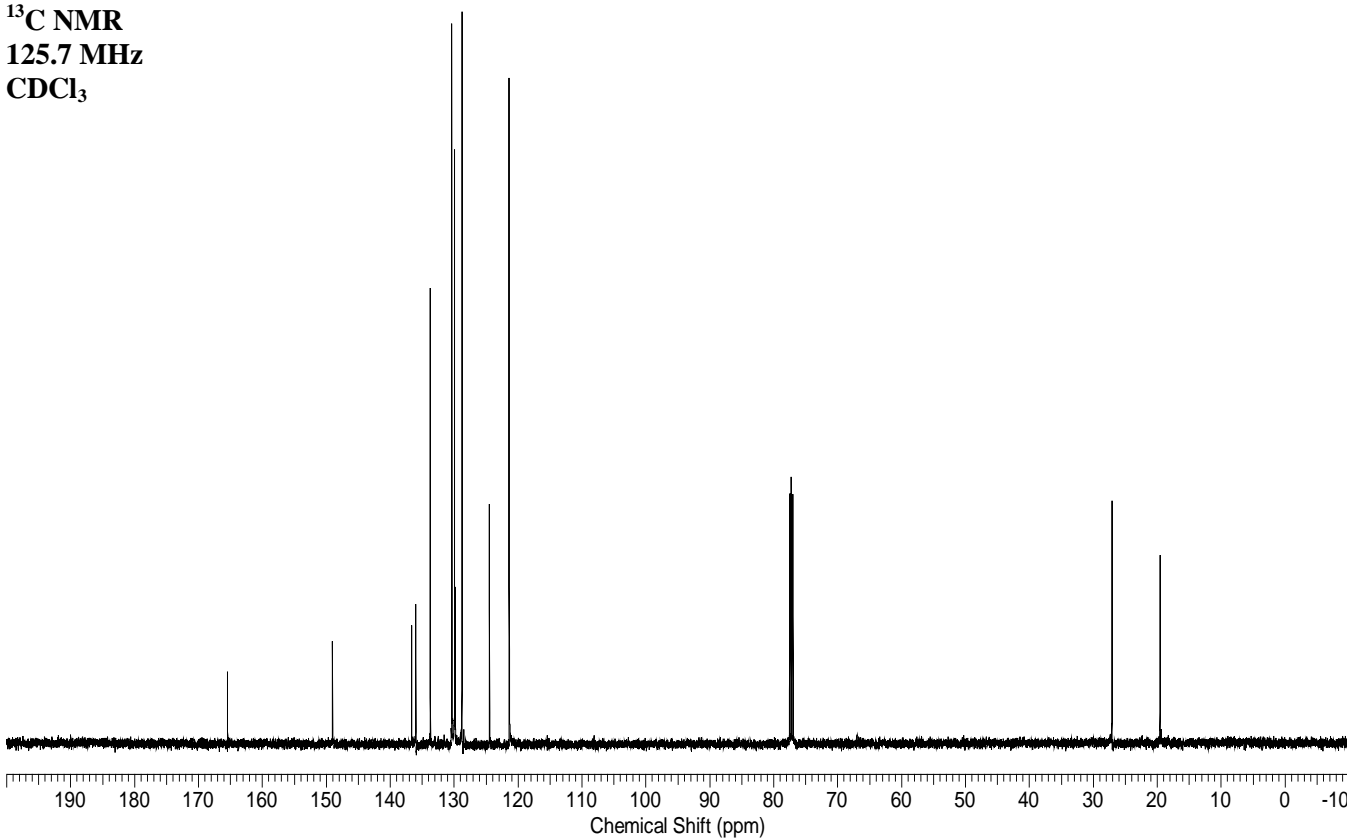

**<sup>1</sup>H NMR**  
**500 MHz**  
**CDCl<sub>3</sub>**

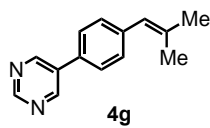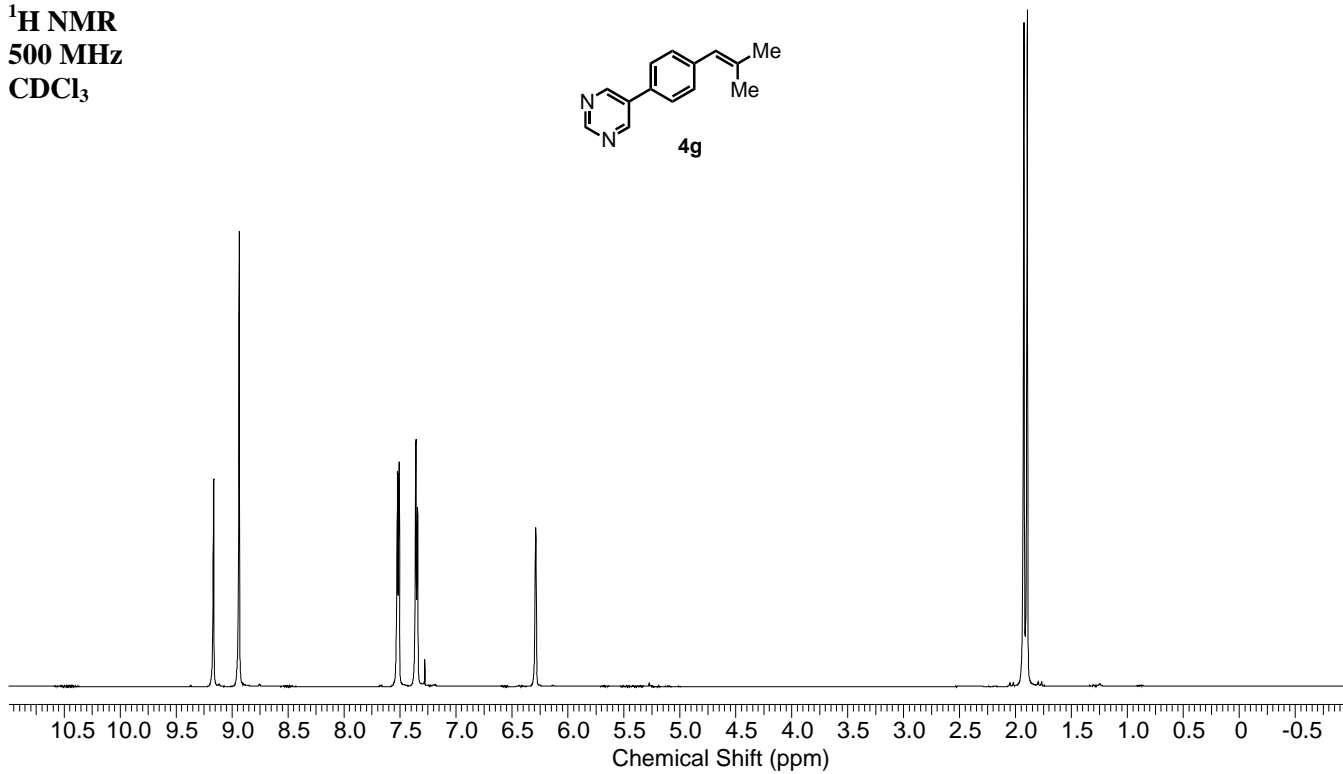

**<sup>13</sup>C NMR**  
**125.7 MHz**  
**CDCl<sub>3</sub>**

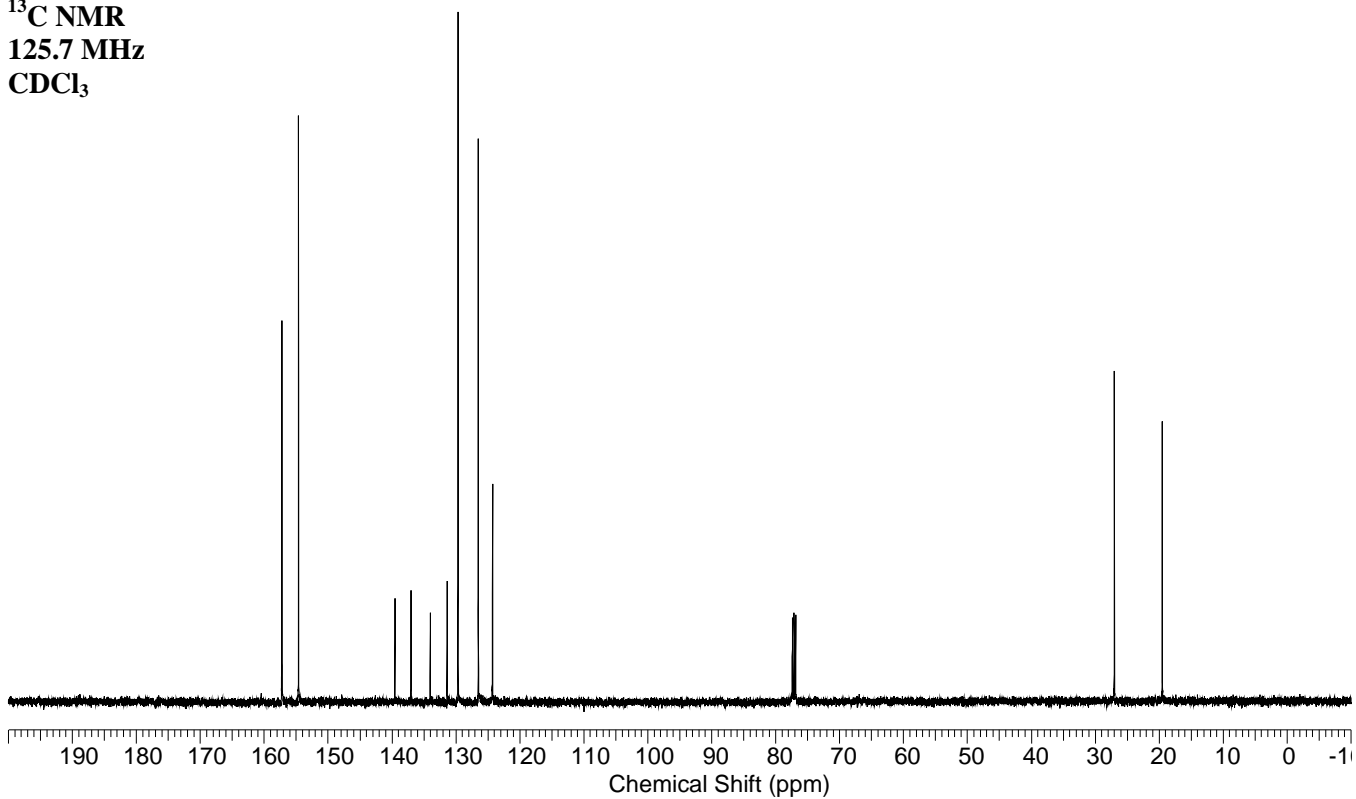

**<sup>1</sup>H NMR**  
**500 MHz**  
**CDCl<sub>3</sub>**

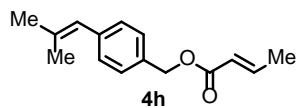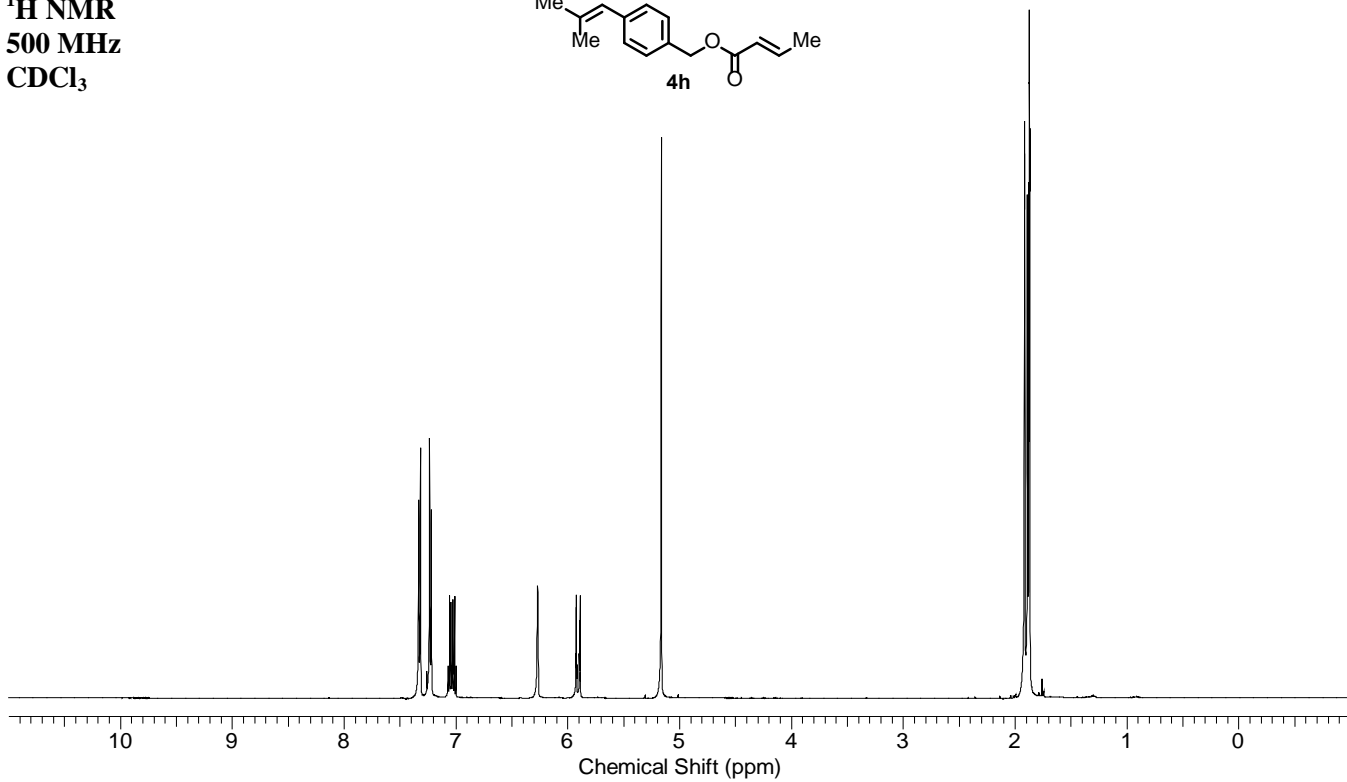

**<sup>13</sup>C NMR**  
**125.7 MHz**  
**CDCl<sub>3</sub>**

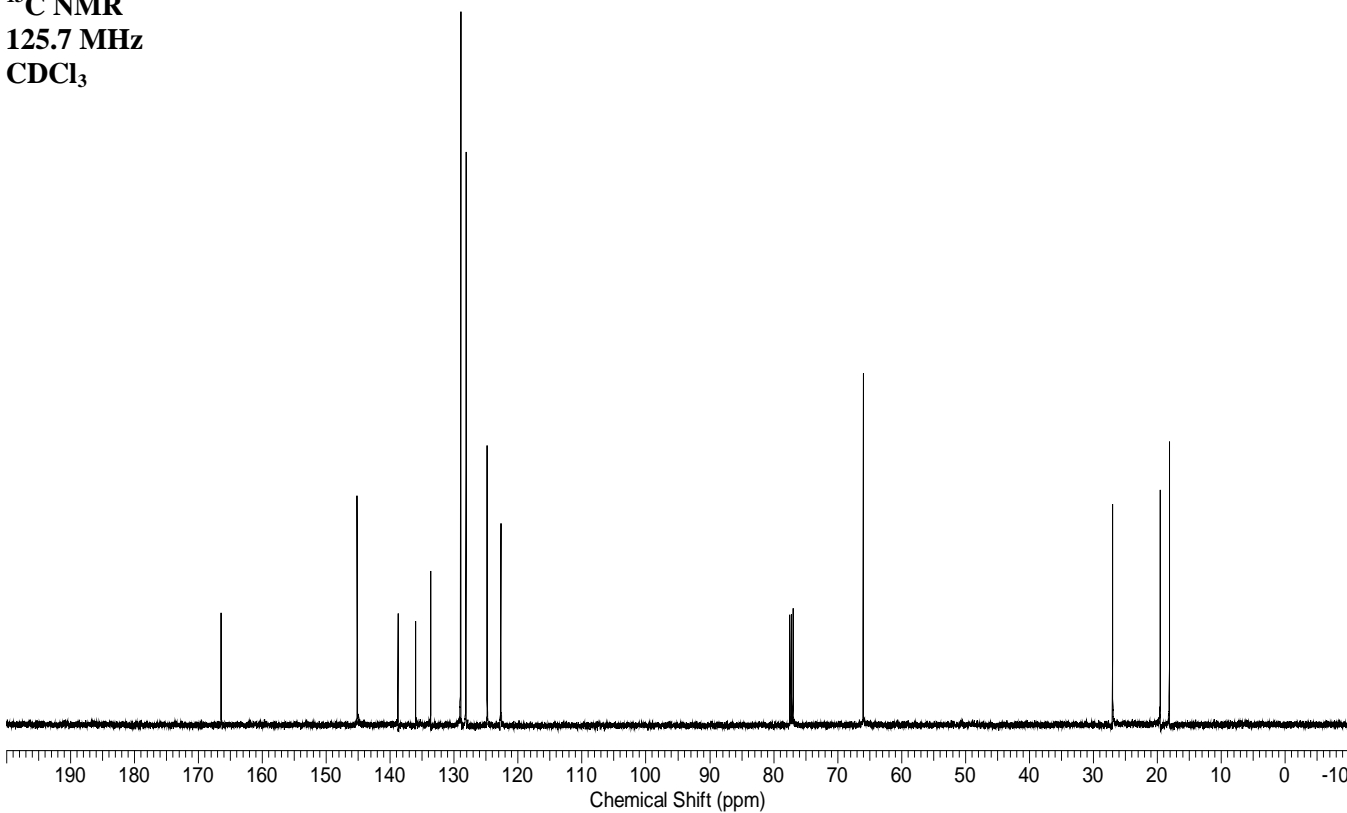



**<sup>1</sup>H NMR**  
**500 MHz**  
**CDCl<sub>3</sub>**

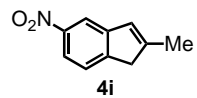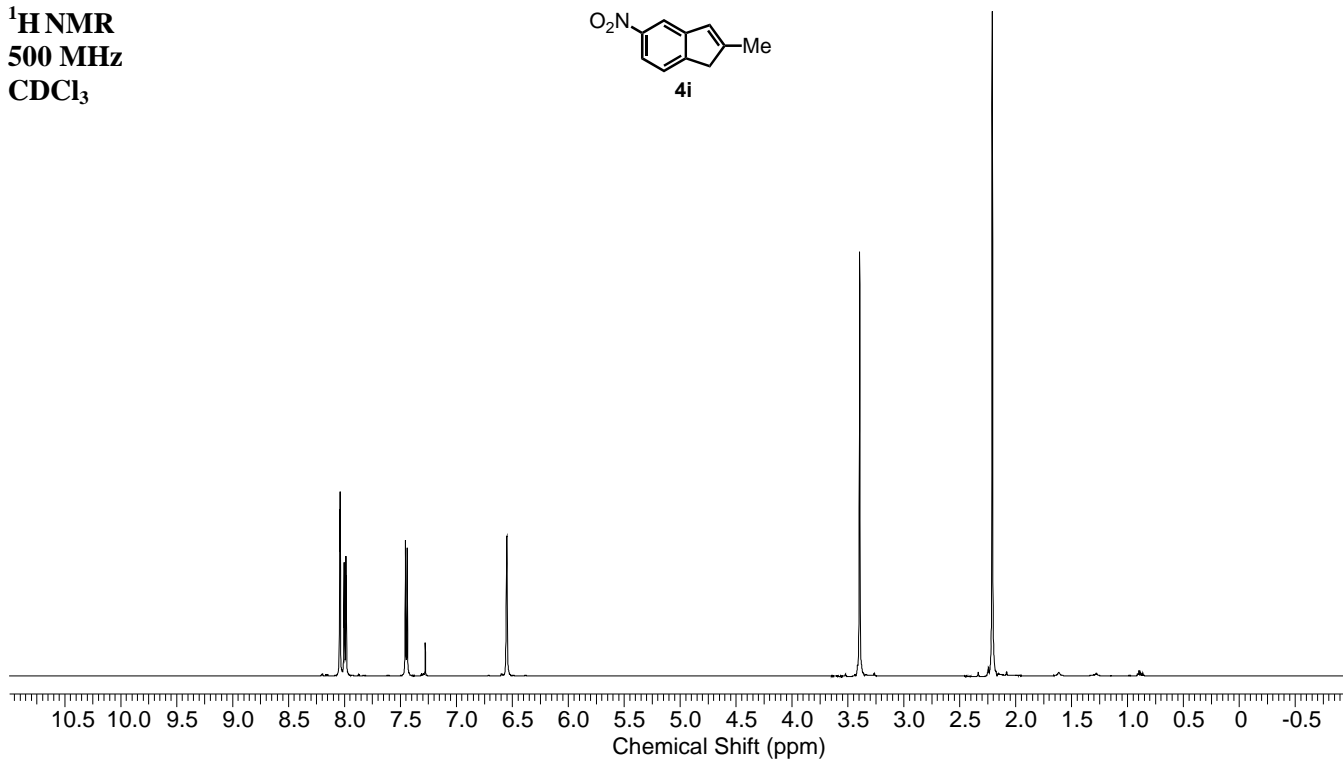

**<sup>13</sup>C NMR**  
**125.7 MHz**  
**CDCl<sub>3</sub>**

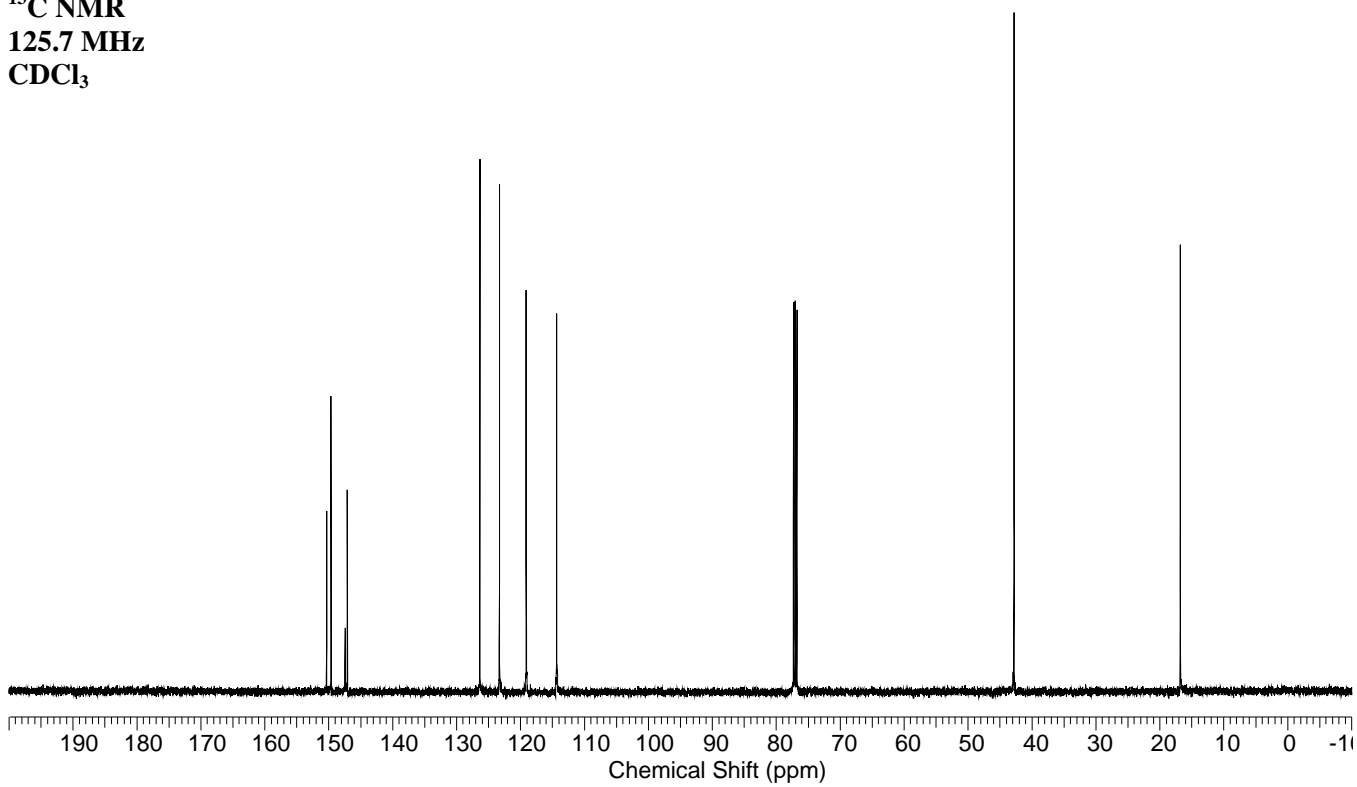

**<sup>1</sup>H NMR**  
**500 MHz**  
**CDCl<sub>3</sub>**

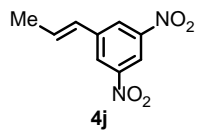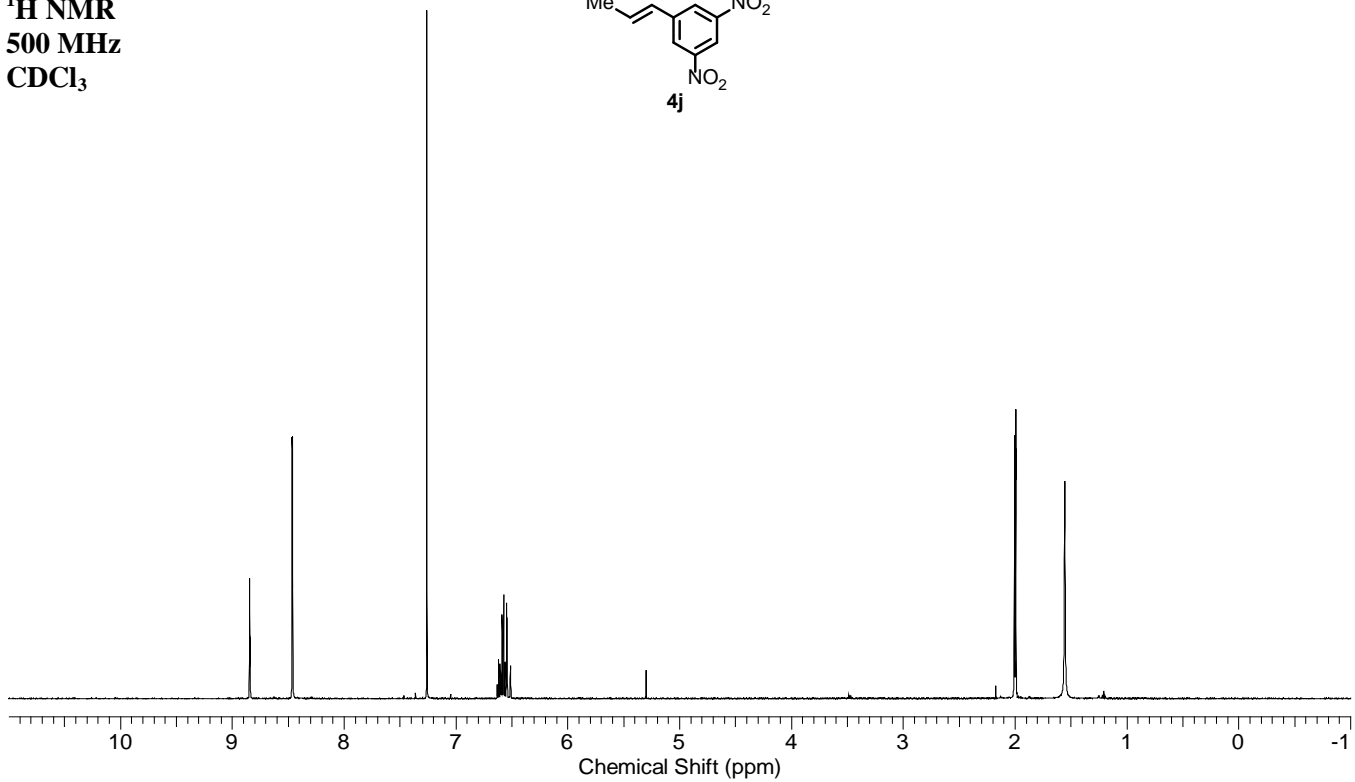

**<sup>13</sup>C NMR**  
**125.7 MHz**  
**CDCl<sub>3</sub>**

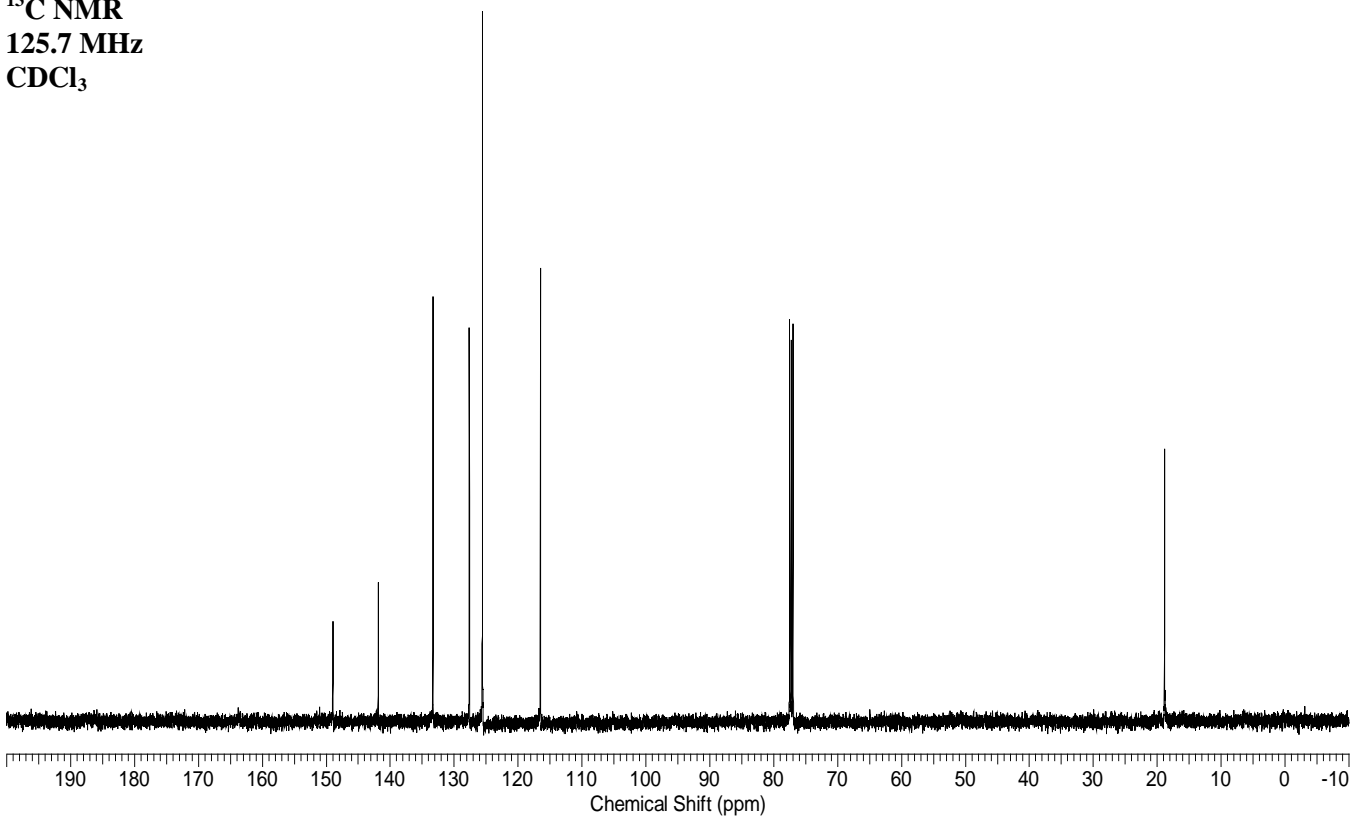

**<sup>1</sup>H NMR**  
**500 MHz**  
**Acetone-*d*<sub>6</sub>**

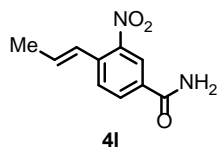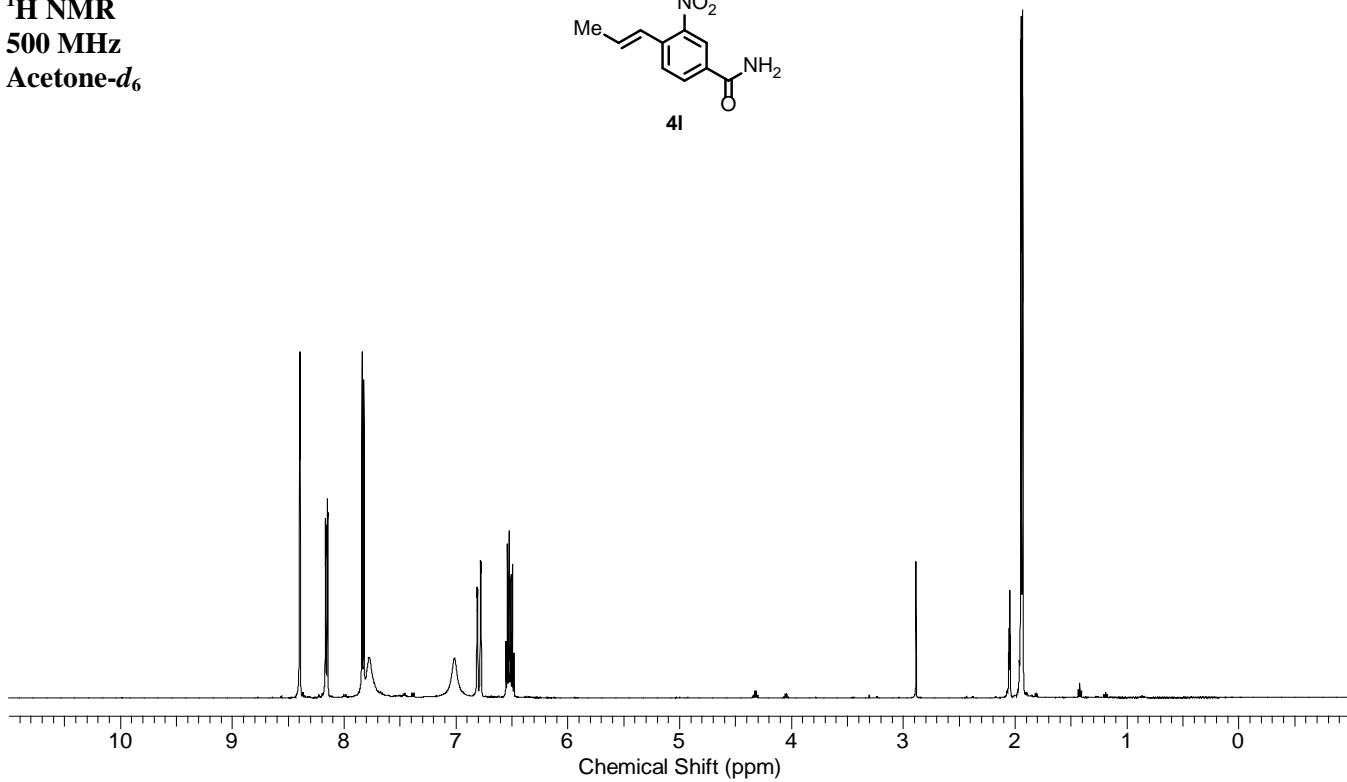

**<sup>13</sup>C NMR**  
**125.7 MHz**  
**Acetone-*d*<sub>6</sub>**

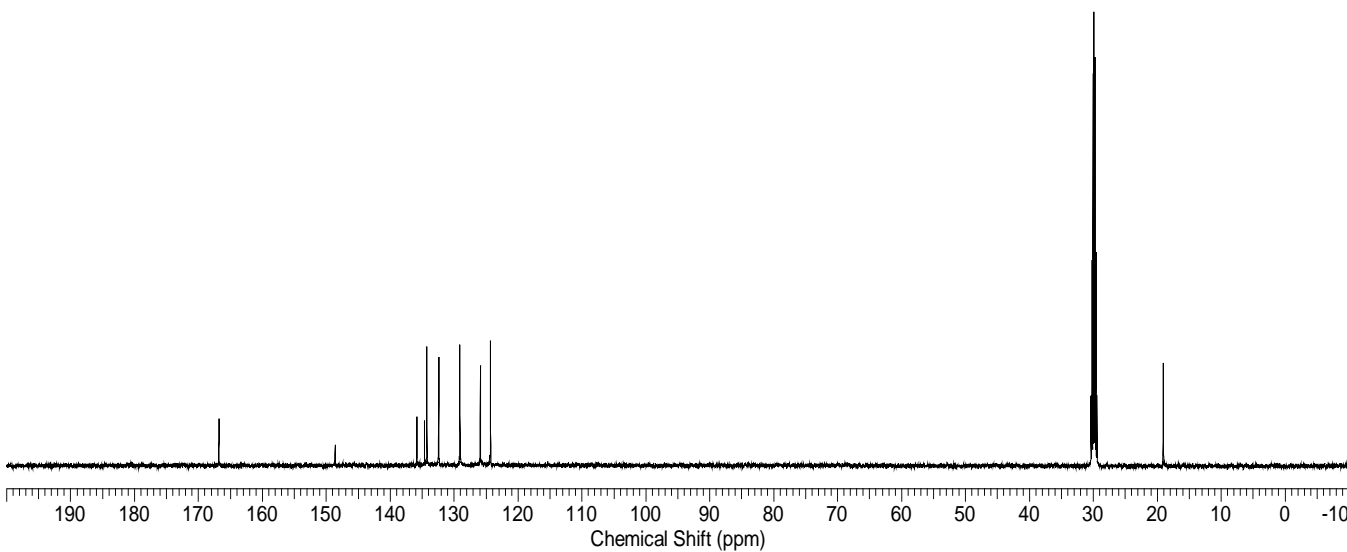

**<sup>1</sup>H NMR**  
**500 MHz**  
**CDCl<sub>3</sub>**

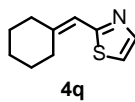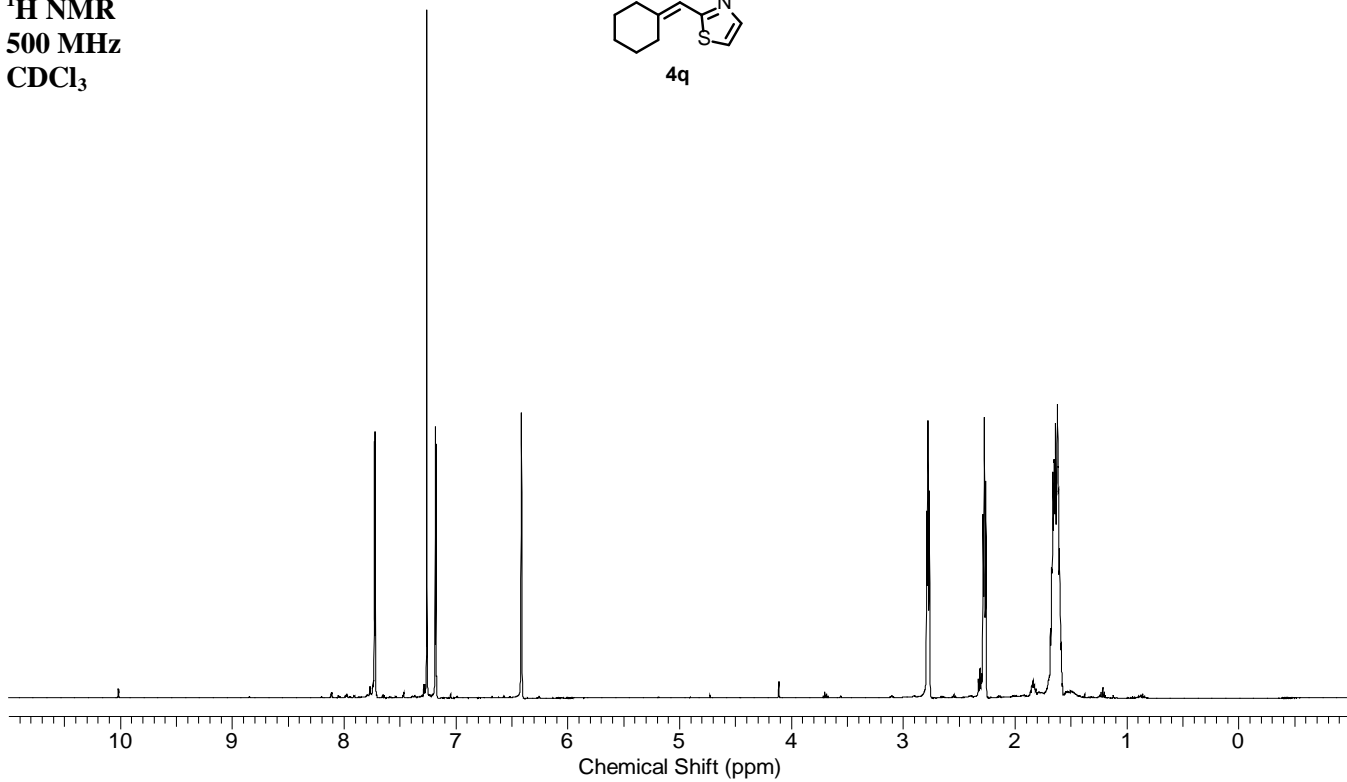

**<sup>13</sup>C NMR**  
**125.7 MHz**  
**CDCl<sub>3</sub>**

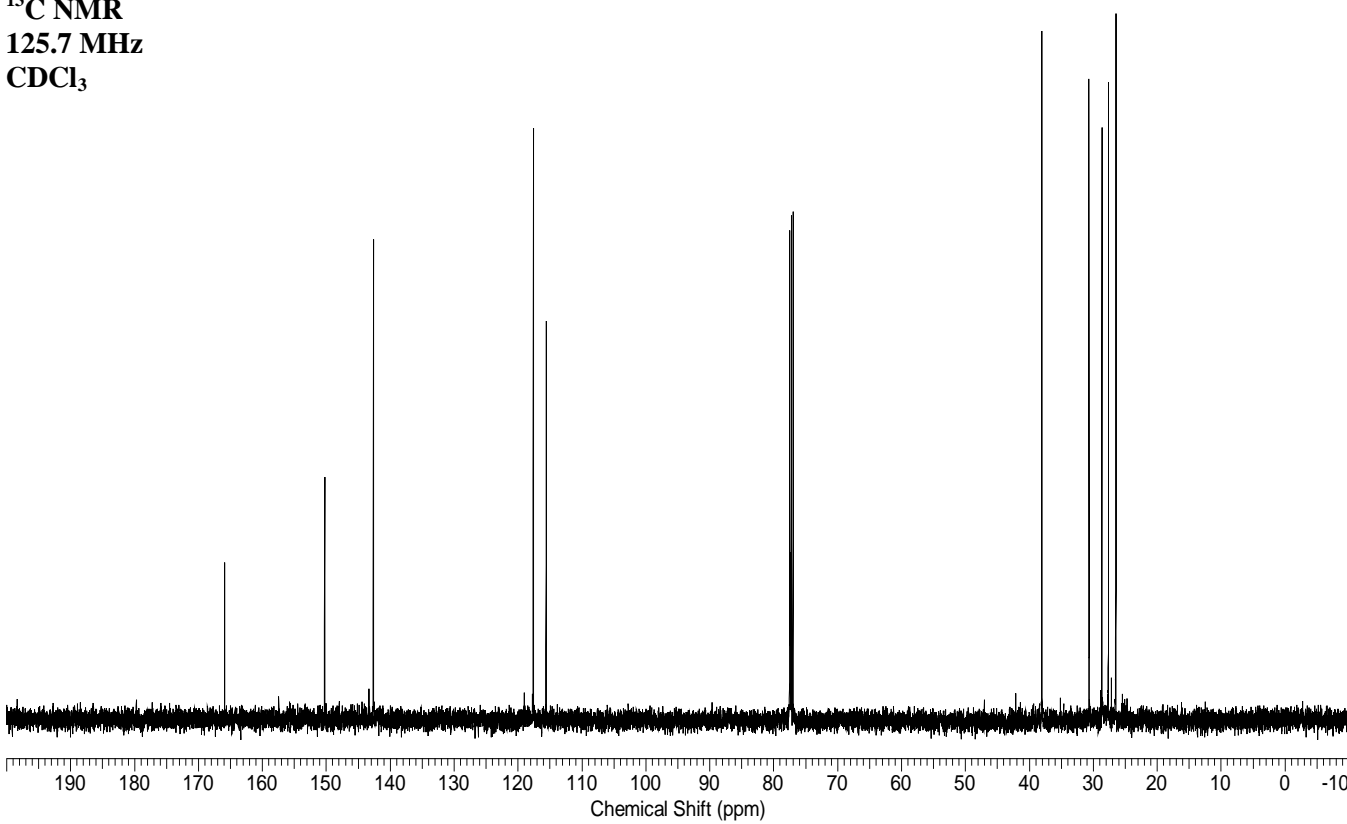

**<sup>1</sup>H NMR**  
**500 MHz**  
**CDCl<sub>3</sub>**

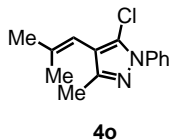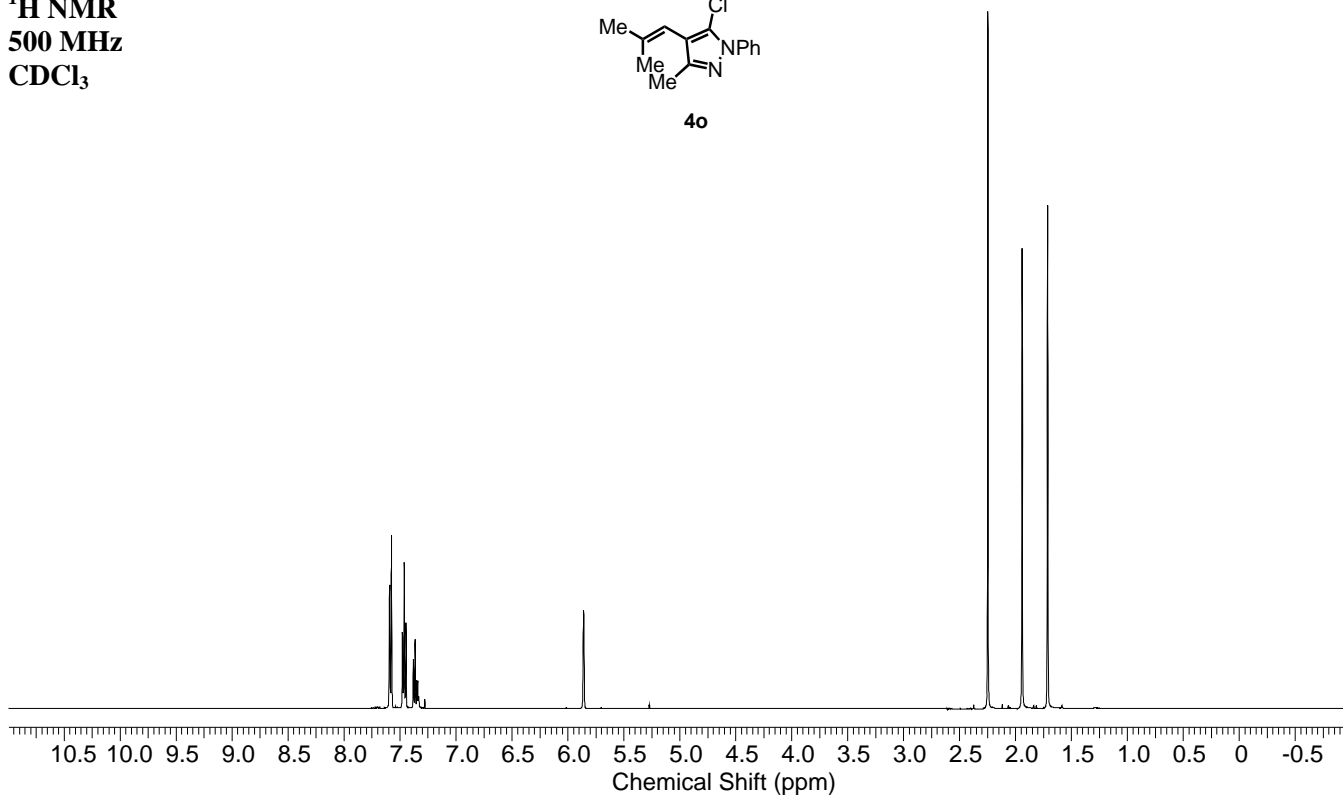

**<sup>13</sup>C NMR**  
**125.7 MHz**  
**CDCl<sub>3</sub>**

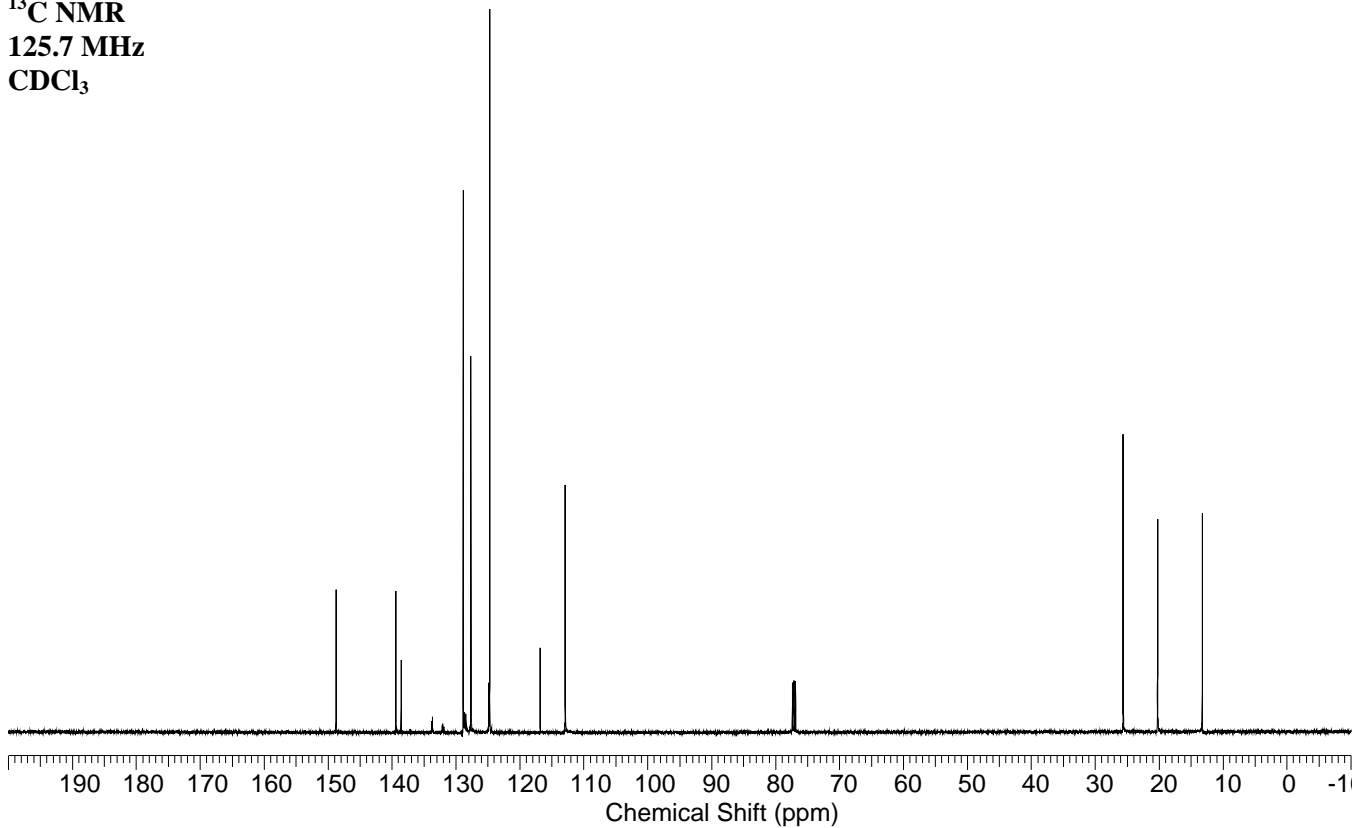

**<sup>1</sup>H NMR**  
**500 MHz**  
**CDCl<sub>3</sub>**

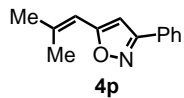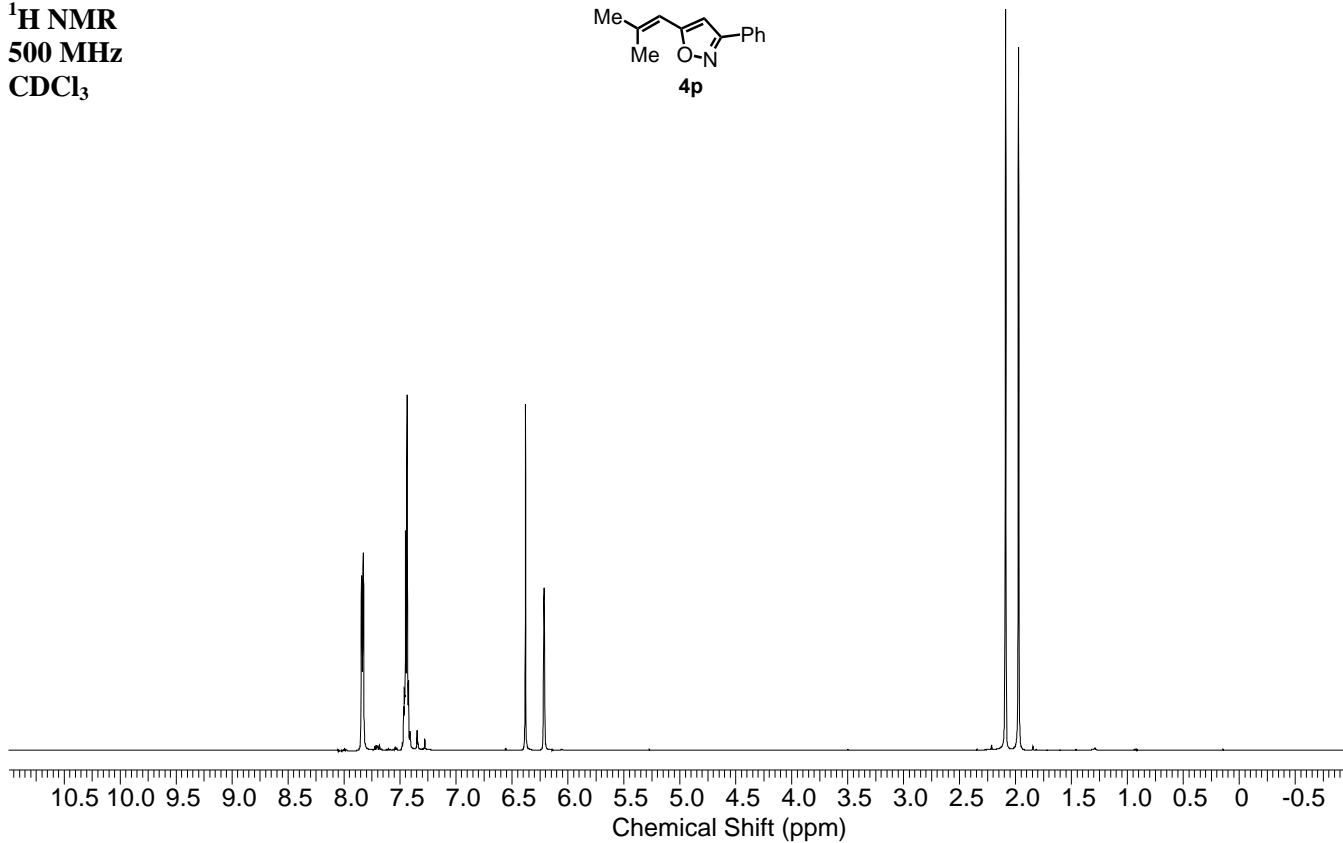

**<sup>13</sup>C NMR**  
**125.7 MHz**  
**CDCl<sub>3</sub>**

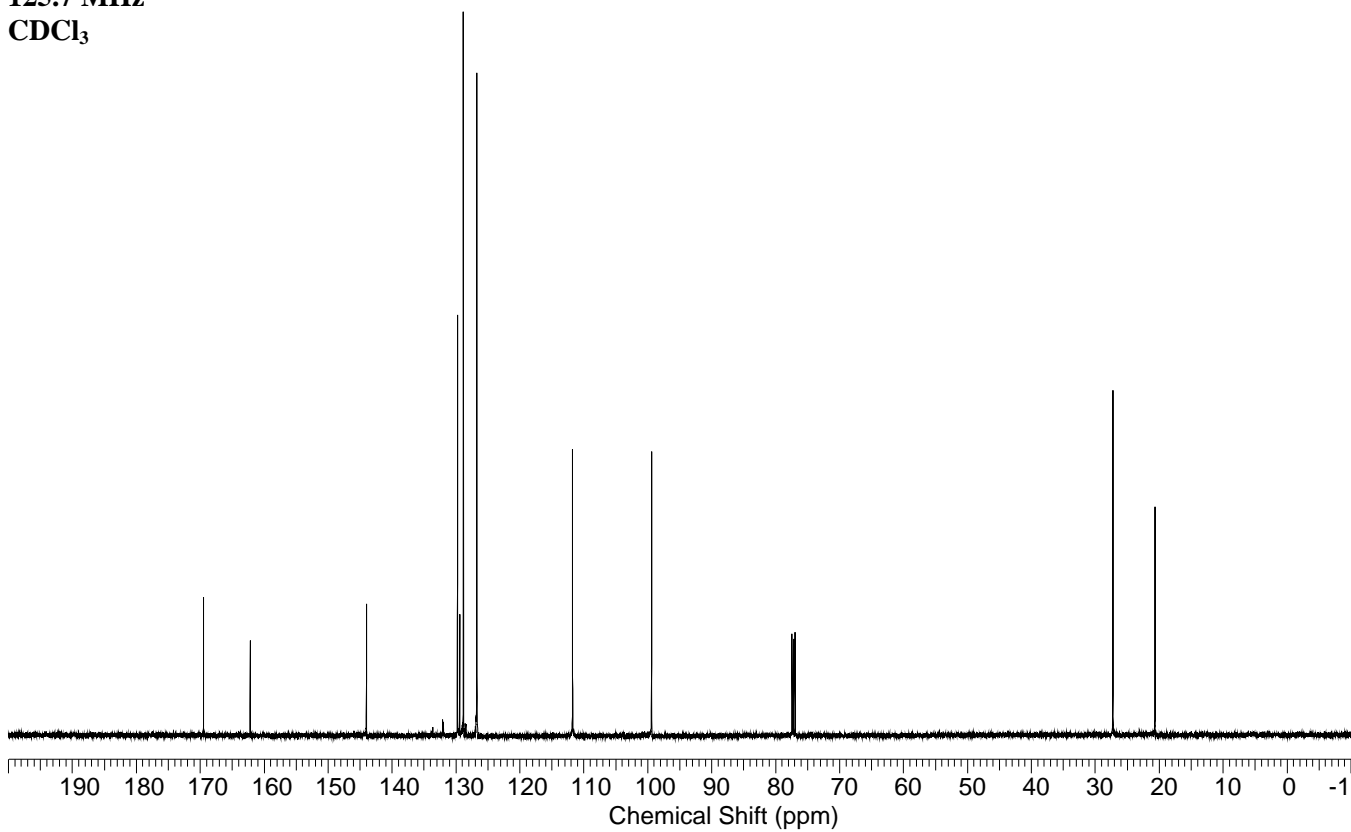

**<sup>1</sup>H NMR**  
**500 MHz**  
**CDCl<sub>3</sub>**

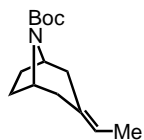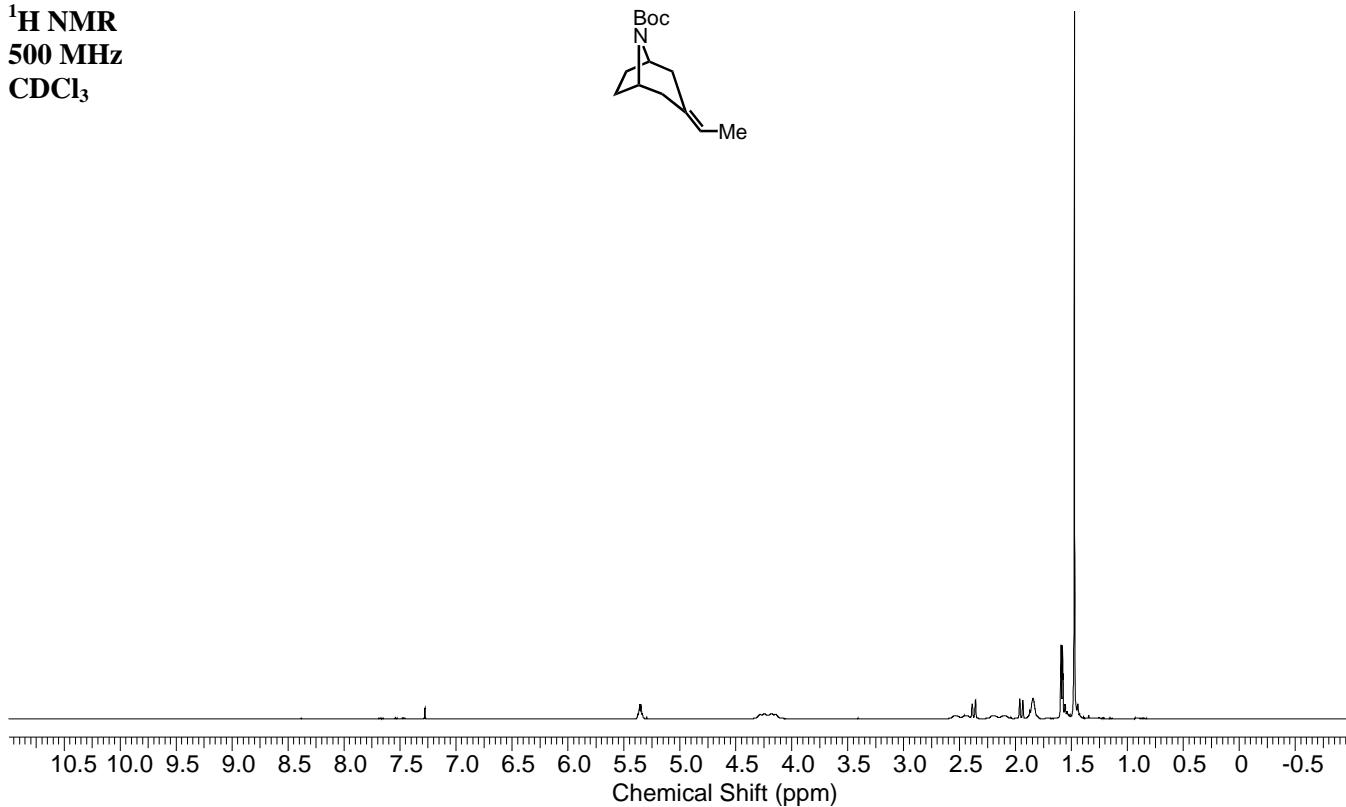

**<sup>13</sup>C NMR**  
**125.7 MHz**  
**CDCl<sub>3</sub>**

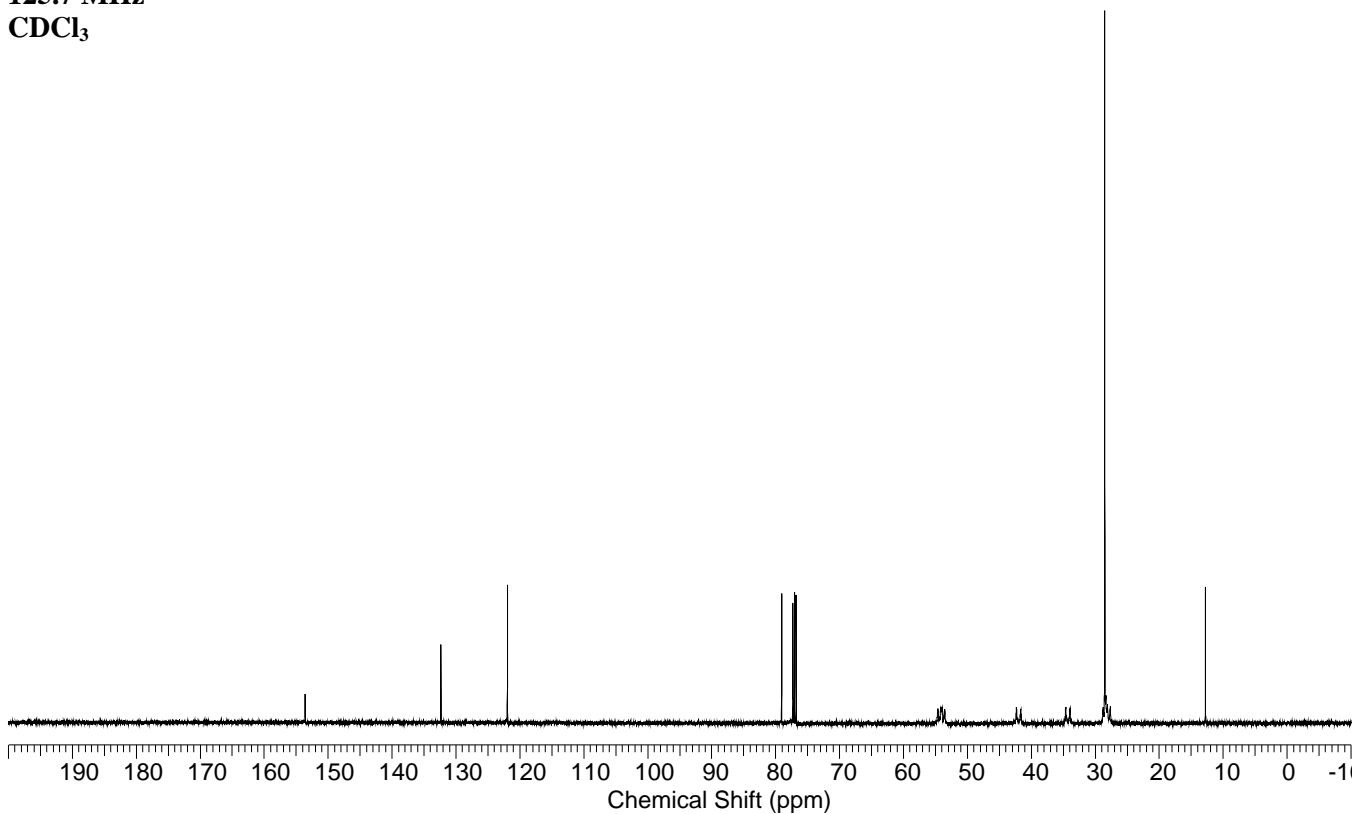

**<sup>1</sup>H NMR**  
**500 MHz**  
**CDCl<sub>3</sub>**

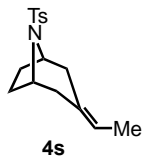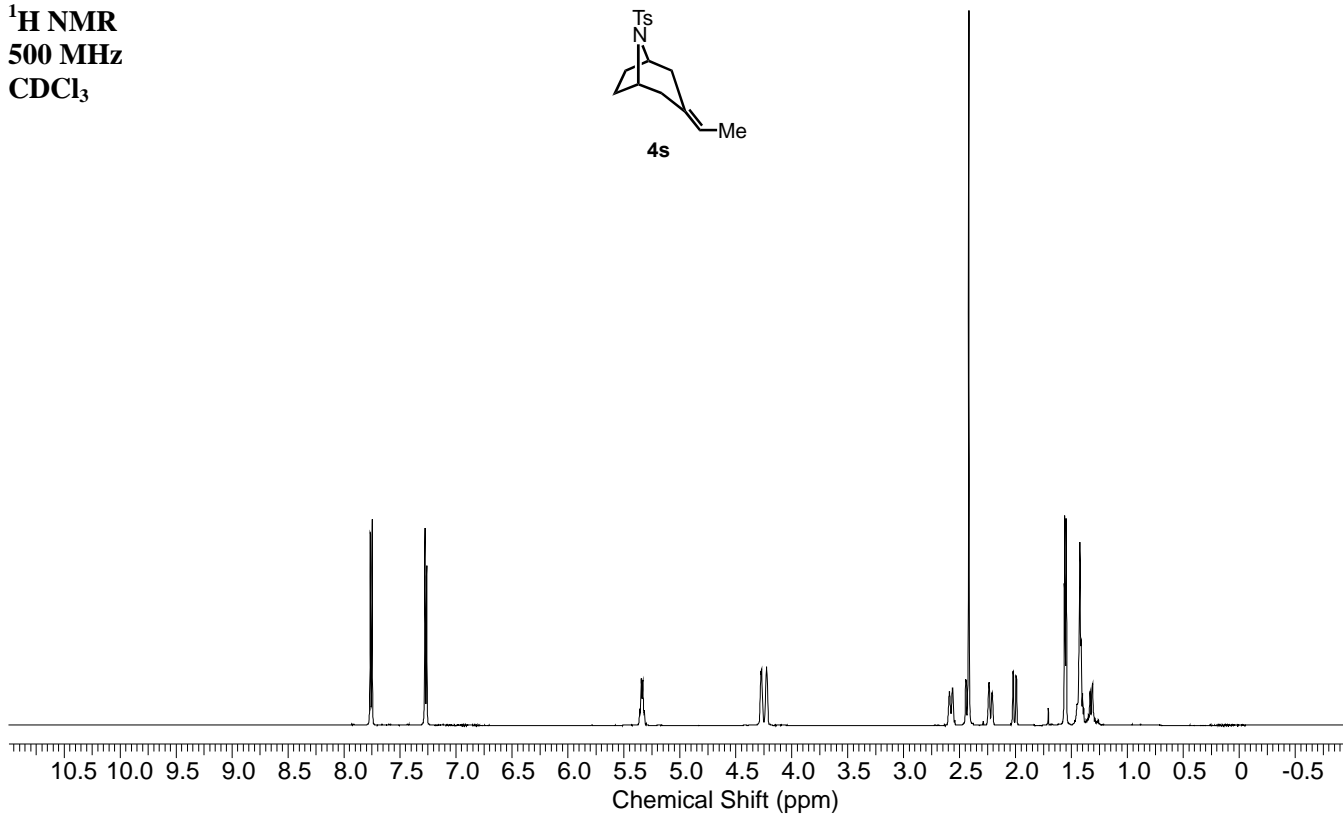

**<sup>13</sup>C NMR**  
**125.7 MHz**  
**CDCl<sub>3</sub>**

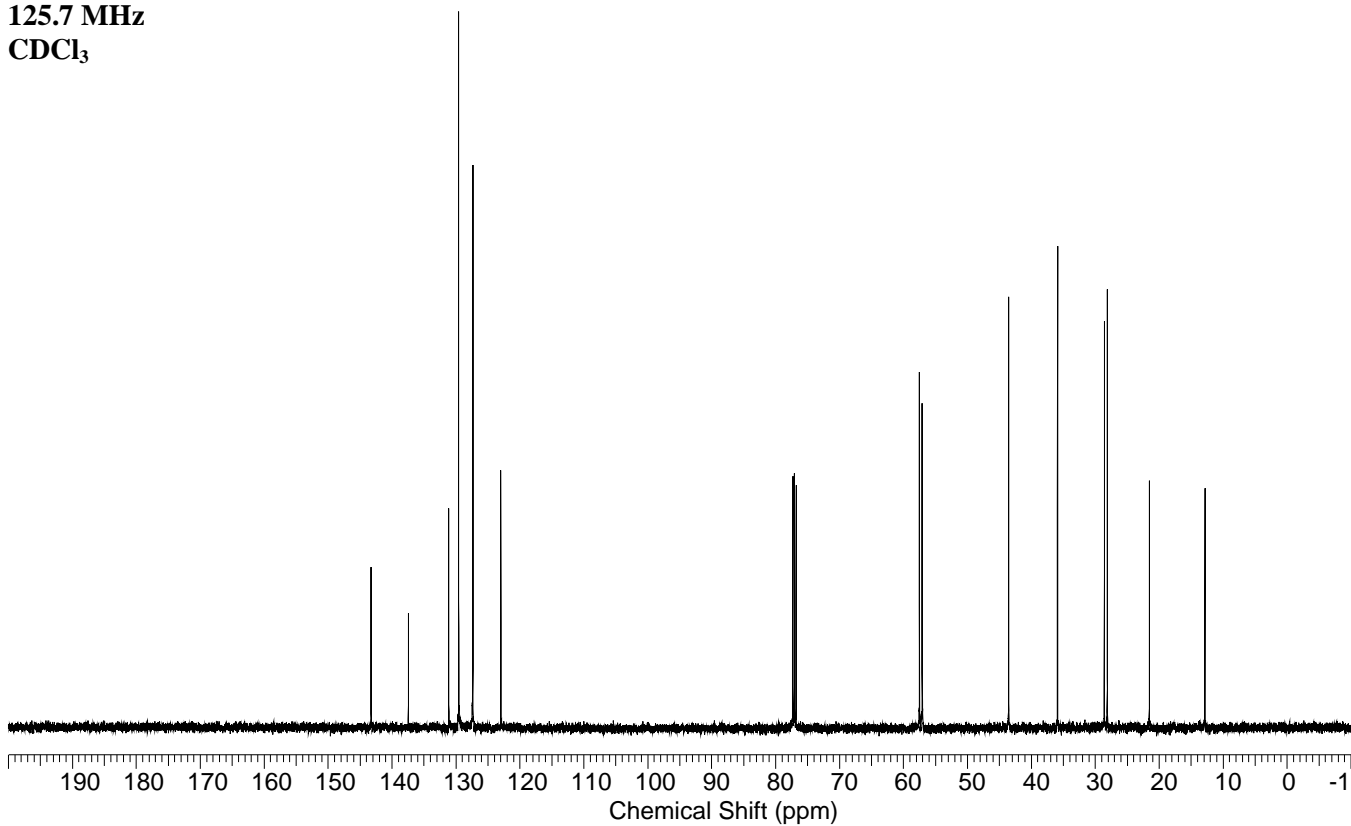



**<sup>1</sup>H NMR**  
**500 MHz**  
**DMSO-*d*<sub>6</sub>**

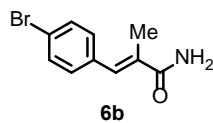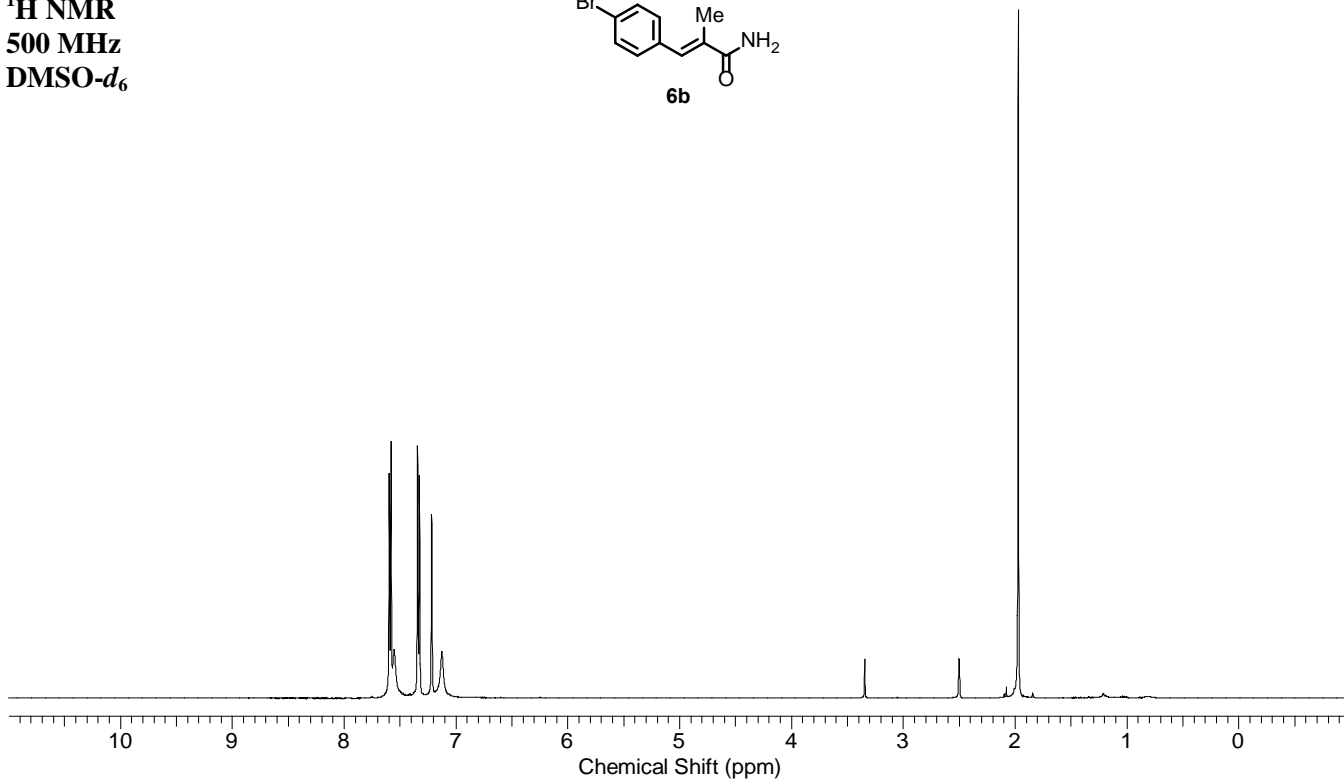

**<sup>13</sup>C NMR**  
**125.7 MHz**  
**DMSO-*d*<sub>6</sub>**

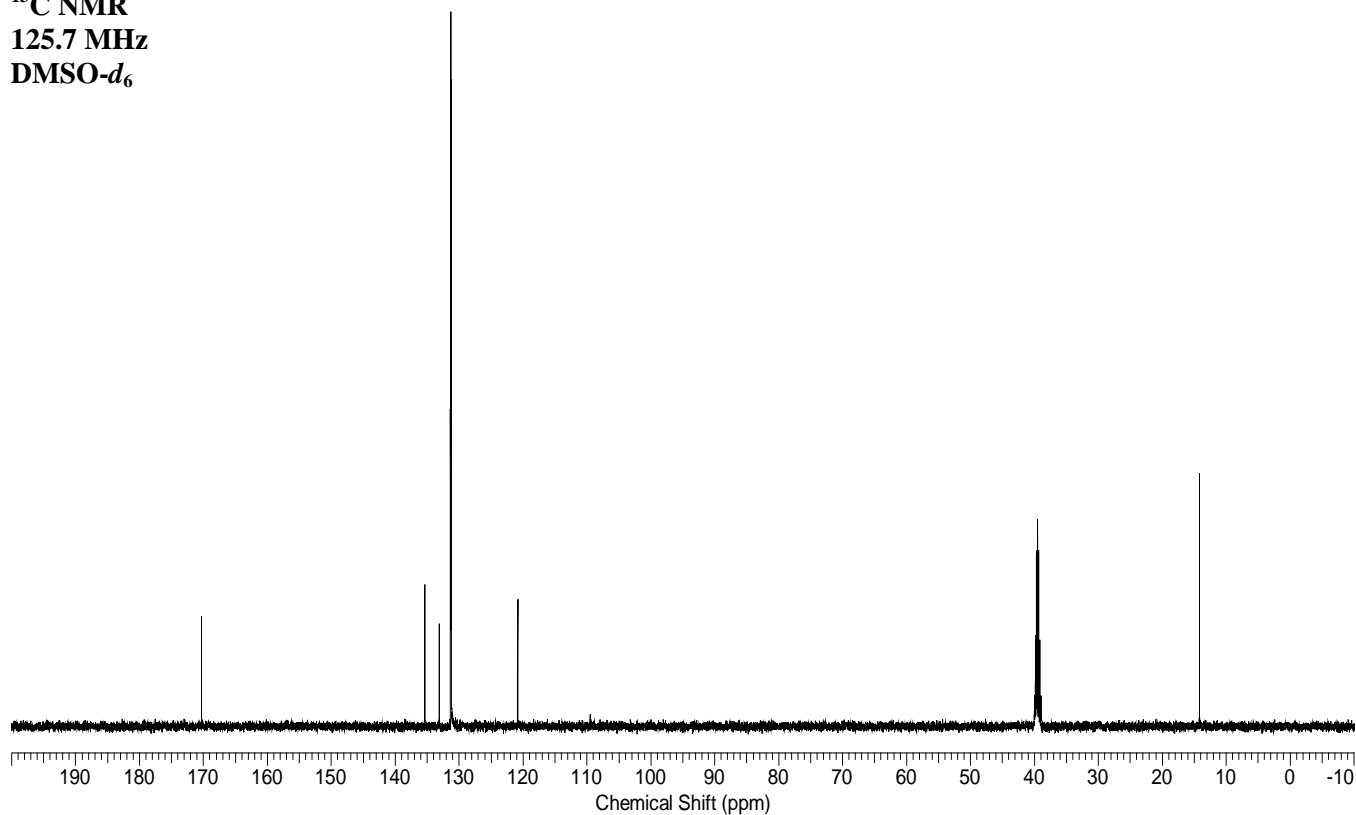

**<sup>1</sup>H NMR**  
**500 MHz**  
**CDCl<sub>3</sub>**

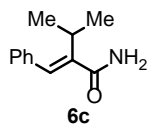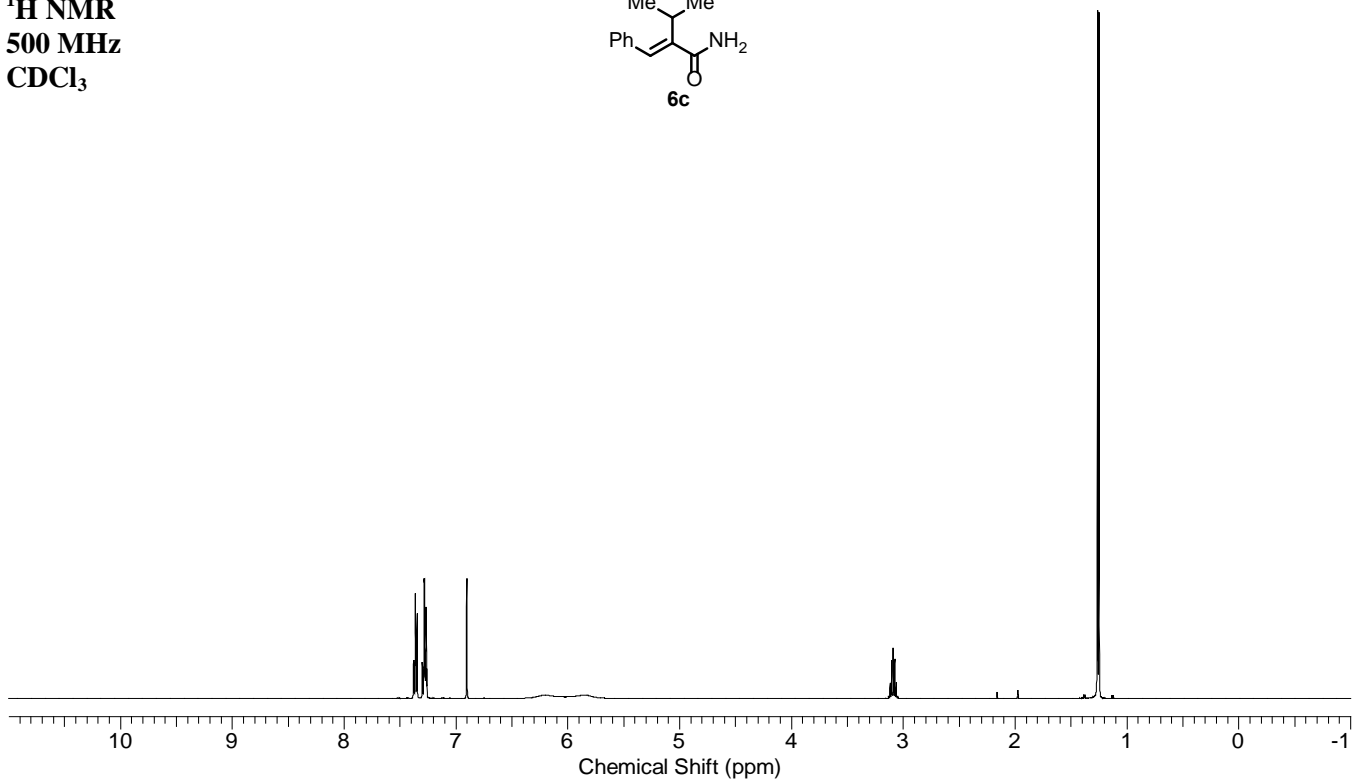

**<sup>13</sup>C NMR**  
**125.7 MHz**  
**CDCl<sub>3</sub>**

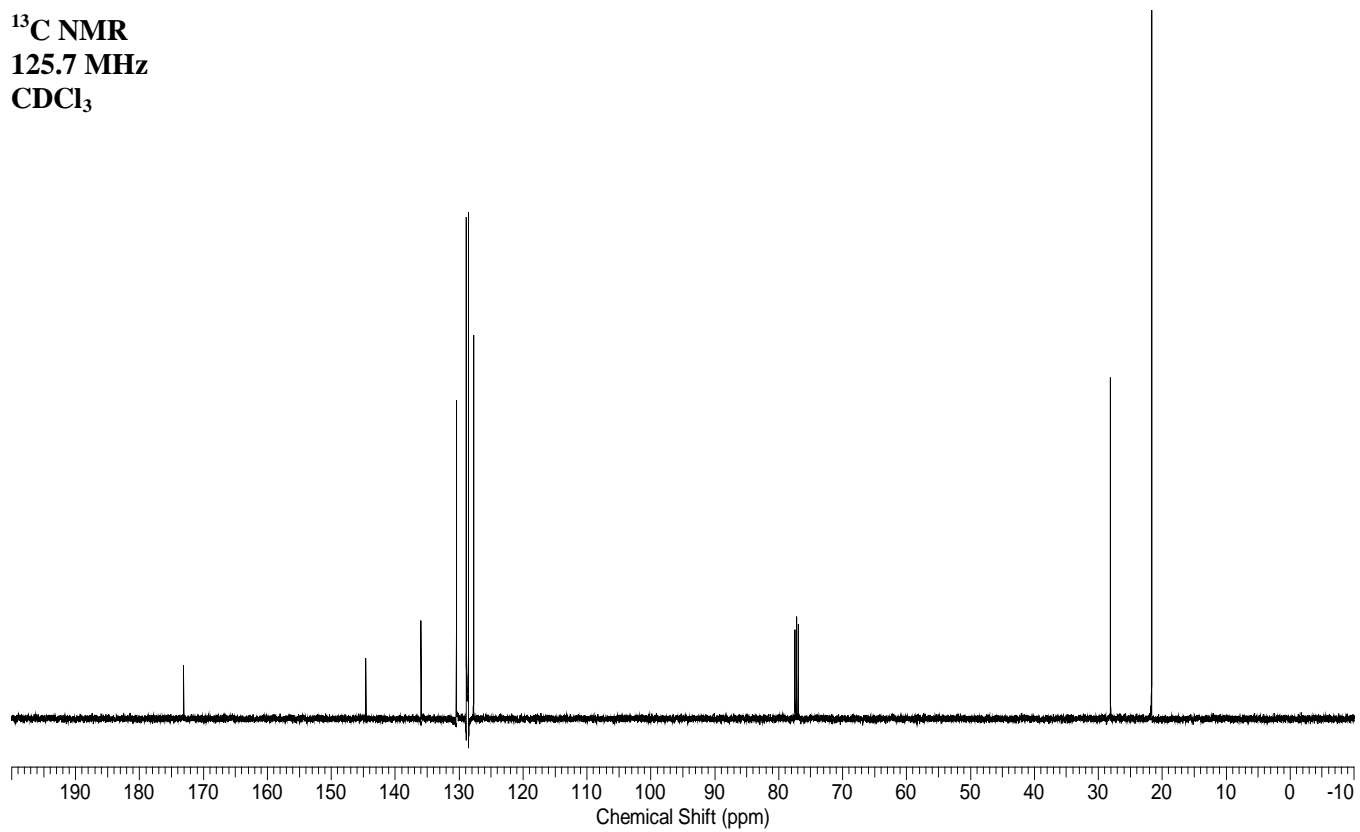

**<sup>1</sup>H NMR**  
**400 MHz**  
**CDCl<sub>3</sub>**

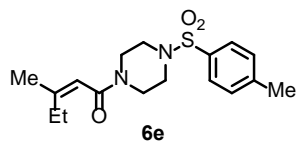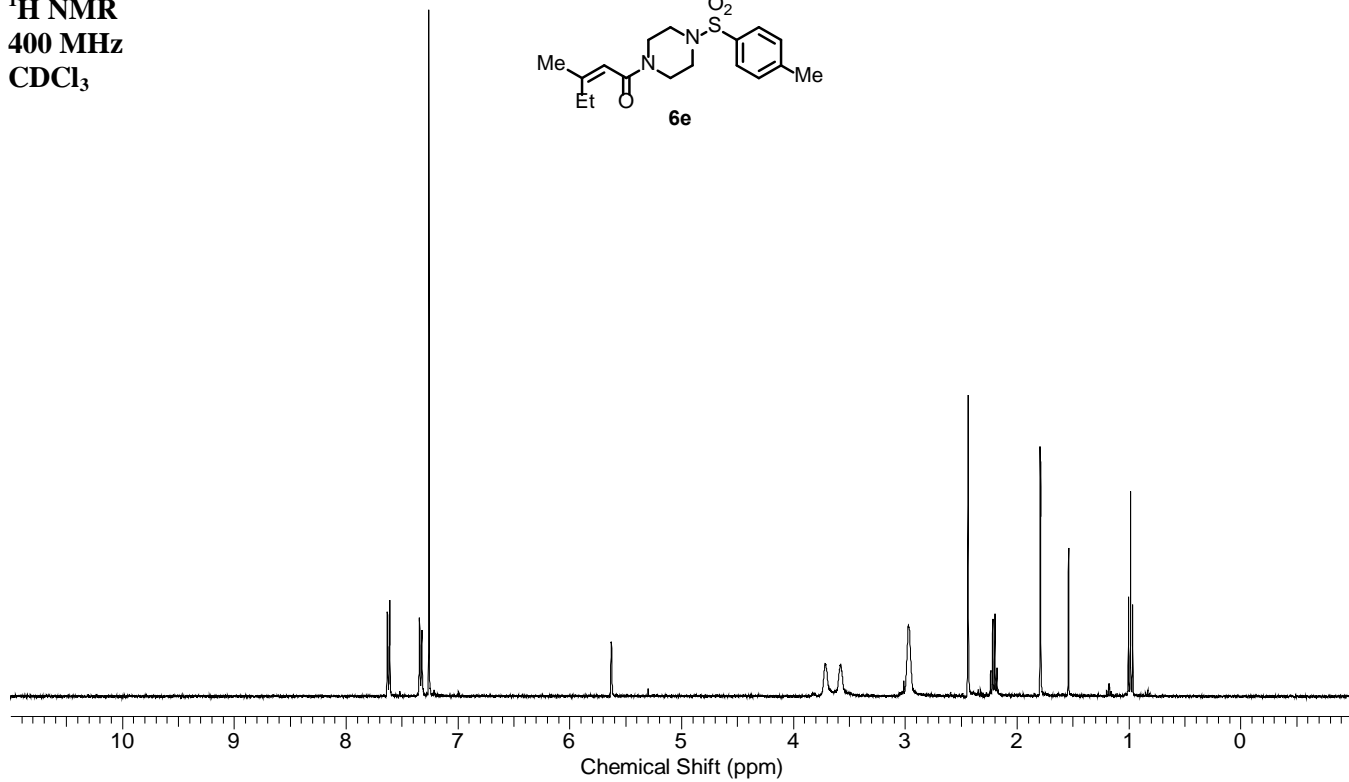

**<sup>13</sup>C NMR**  
**125.7 MHz**  
**CDCl<sub>3</sub>**

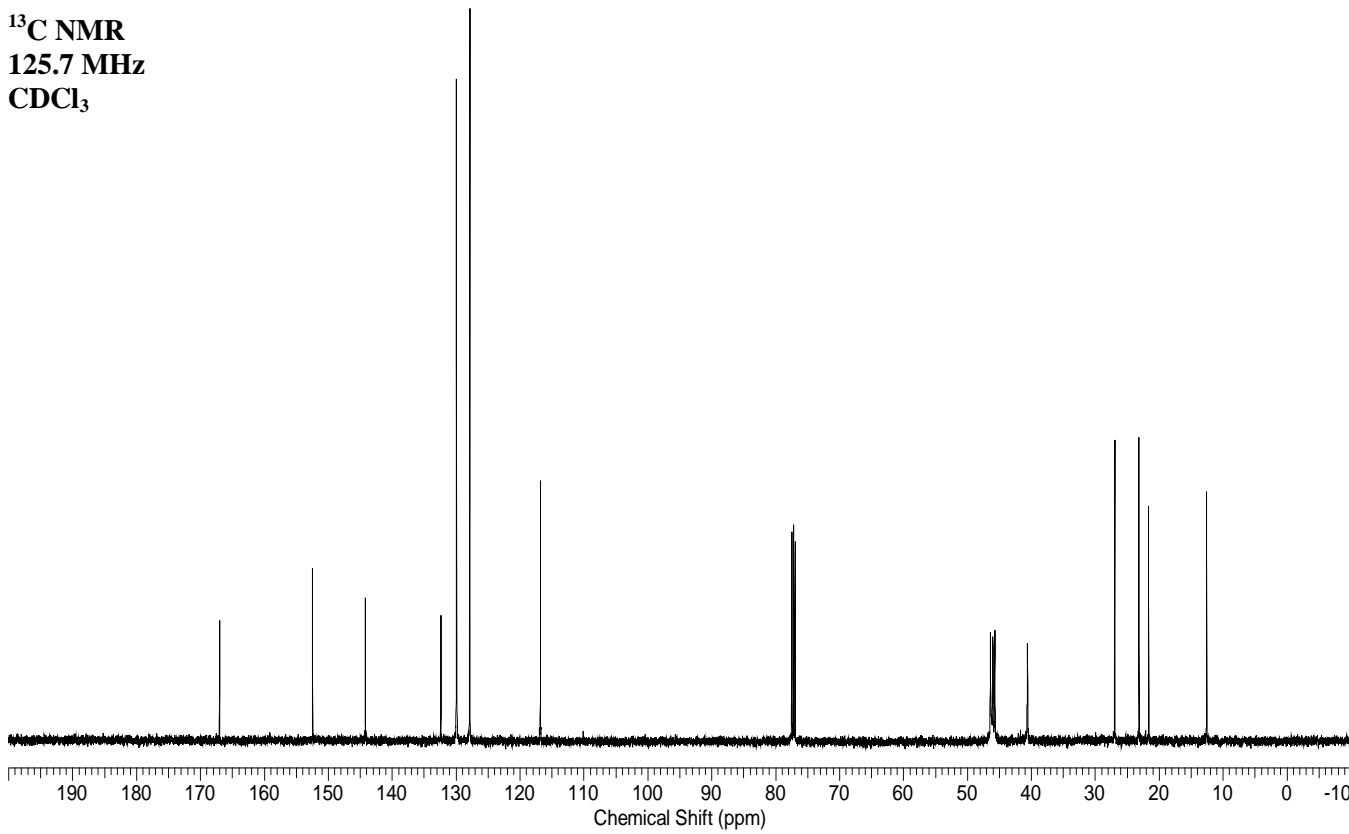

**<sup>1</sup>H NMR**  
**500 MHz**  
**CDCl<sub>3</sub>**

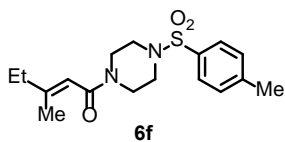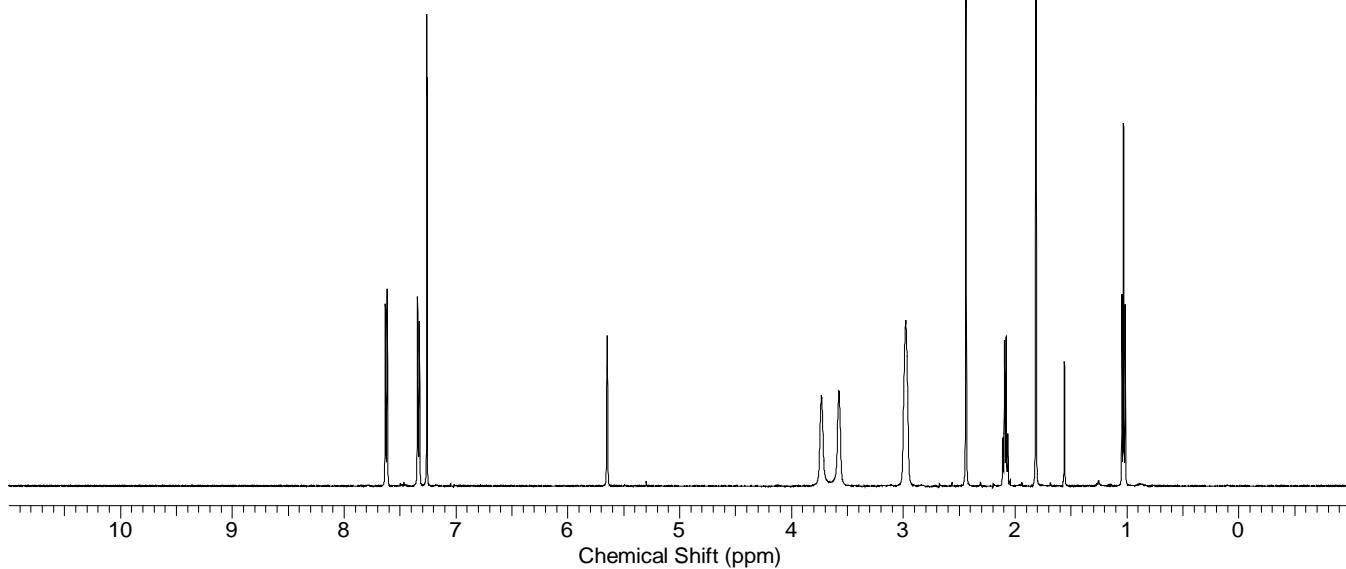

**<sup>13</sup>C NMR**  
**125.7 MHz**  
**CDCl<sub>3</sub>**

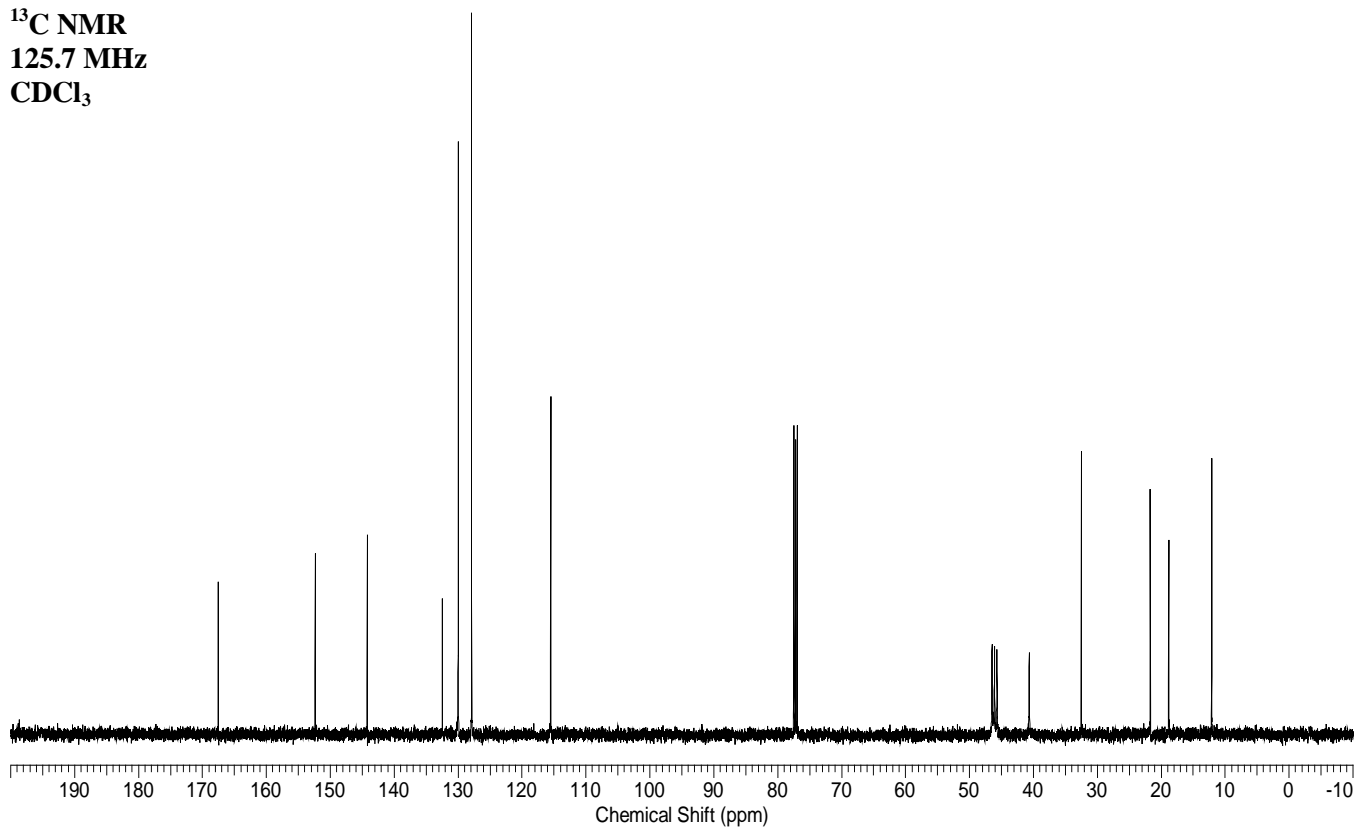

**<sup>1</sup>H NMR**  
**500 MHz**  
**CDCl<sub>3</sub>**

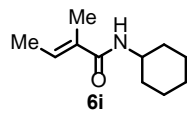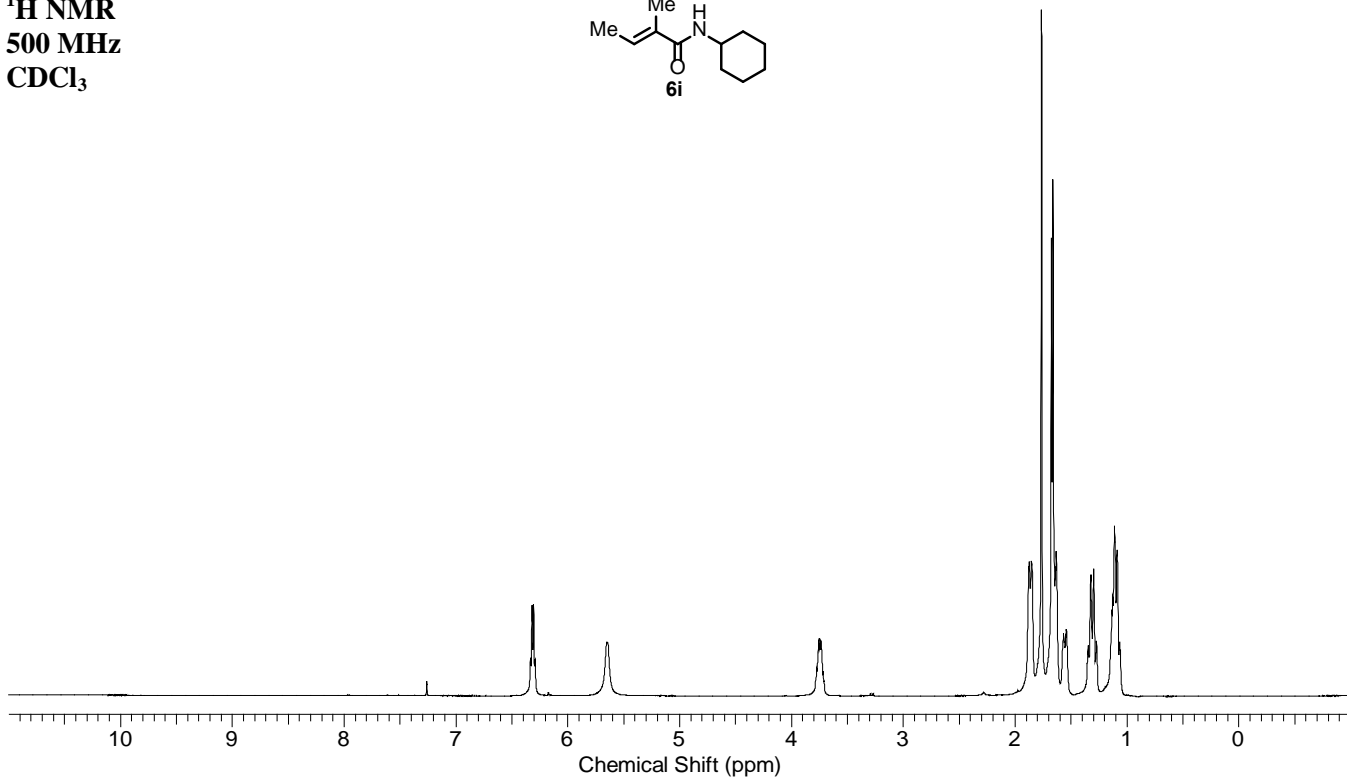

**<sup>13</sup>C NMR**  
**125.7 MHz**  
**CDCl<sub>3</sub>**

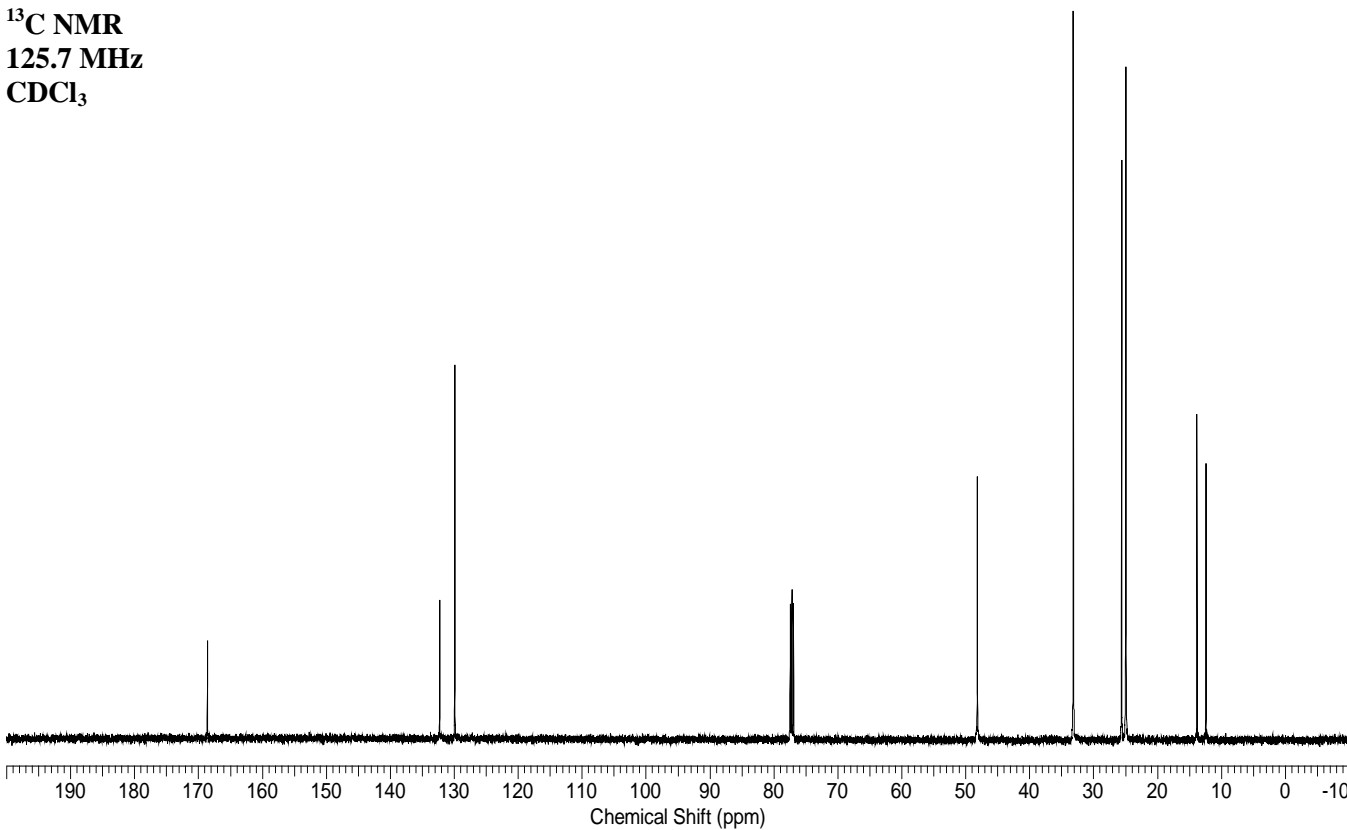

**<sup>1</sup>H NMR**  
**500 MHz**  
**CDCl<sub>3</sub>**

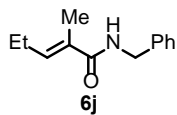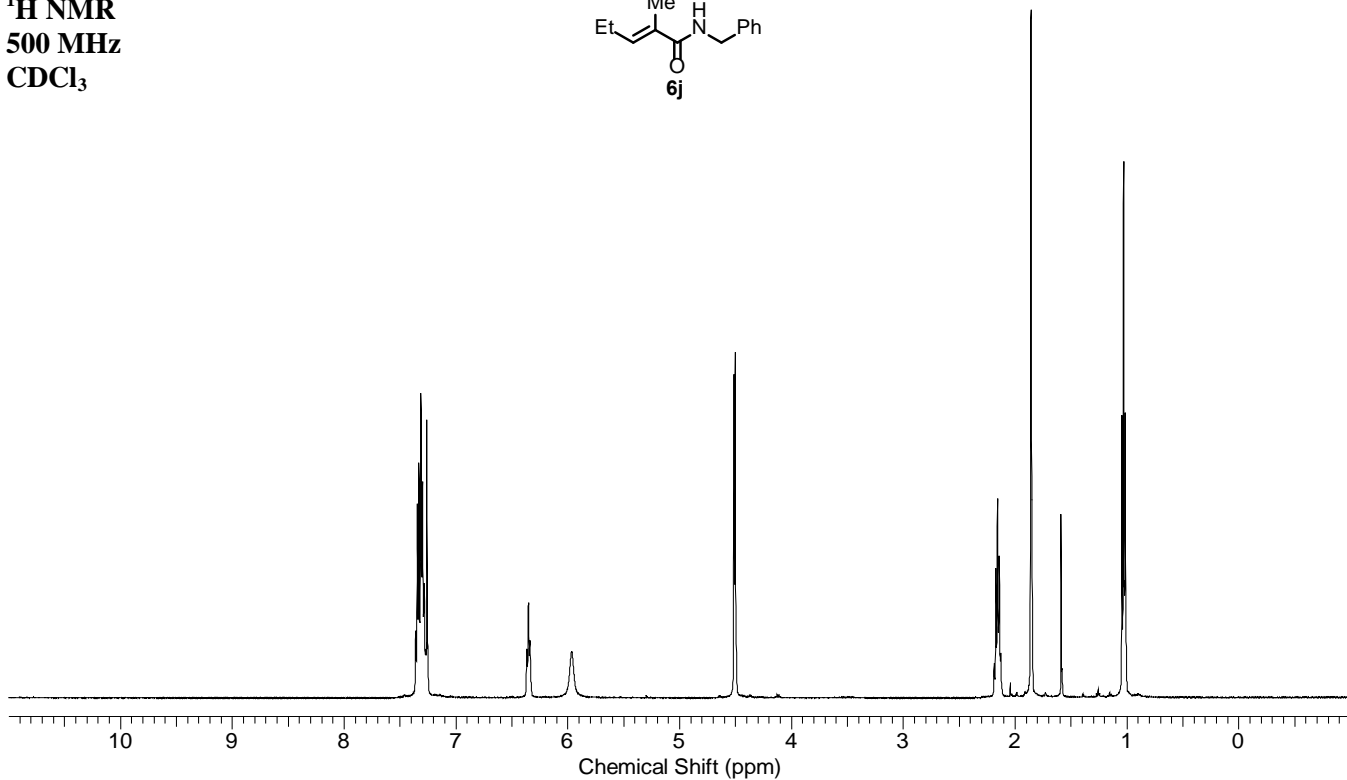

**<sup>13</sup>C NMR**  
**125.7 MHz**  
**CDCl<sub>3</sub>**

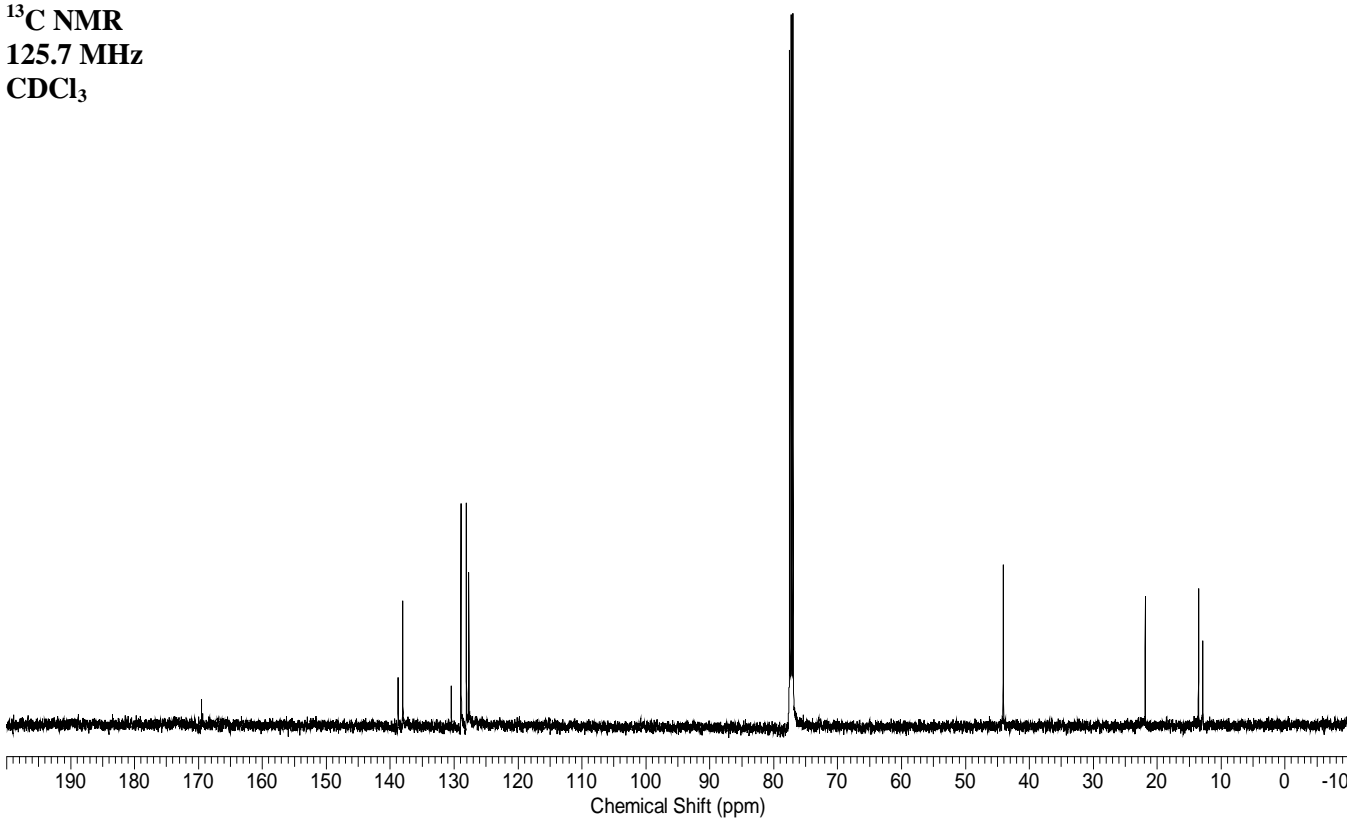

**<sup>1</sup>H NMR**  
**500 MHz**  
**CDCl<sub>3</sub>**

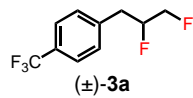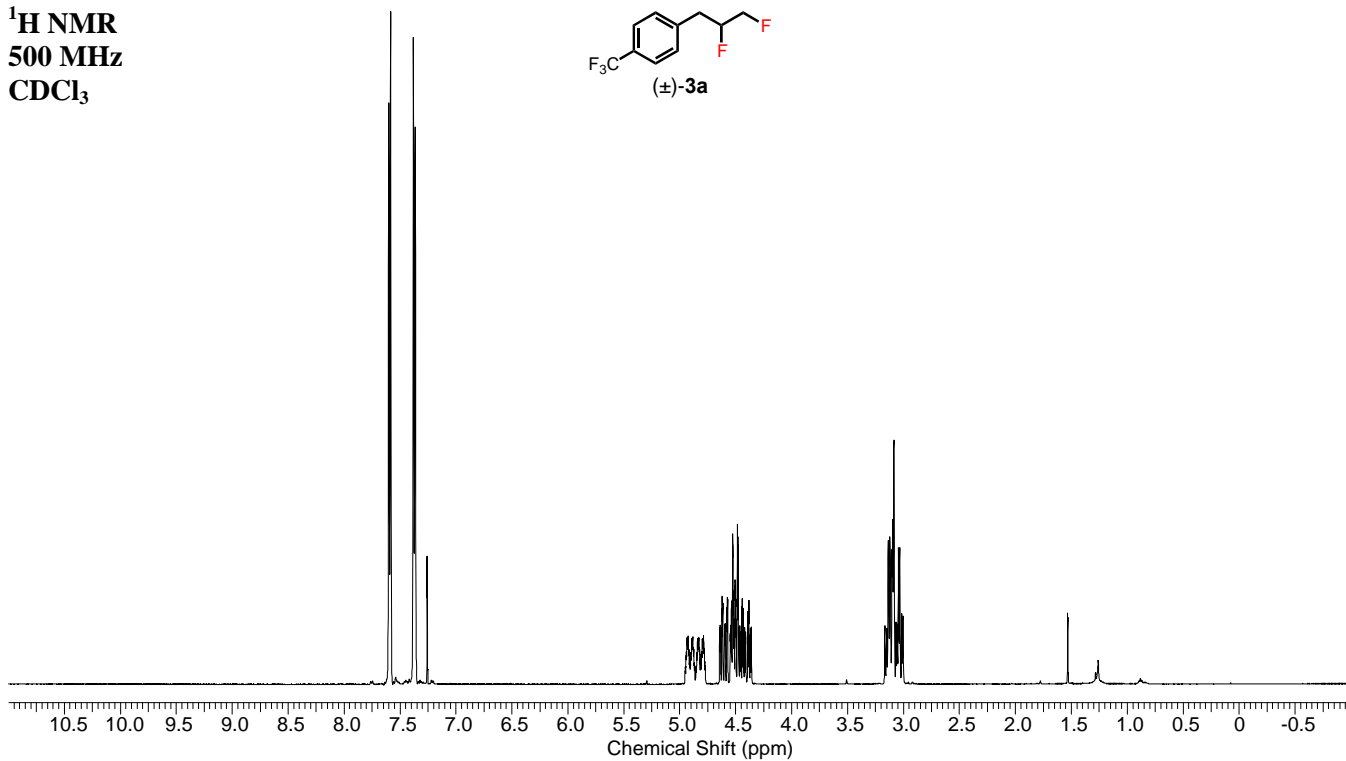

**<sup>13</sup>C NMR**  
**125.7 MHz**  
**CDCl<sub>3</sub>**

**<sup>19</sup>F NMR**  
**470.4 MHz**  
**CDCl<sub>3</sub>**

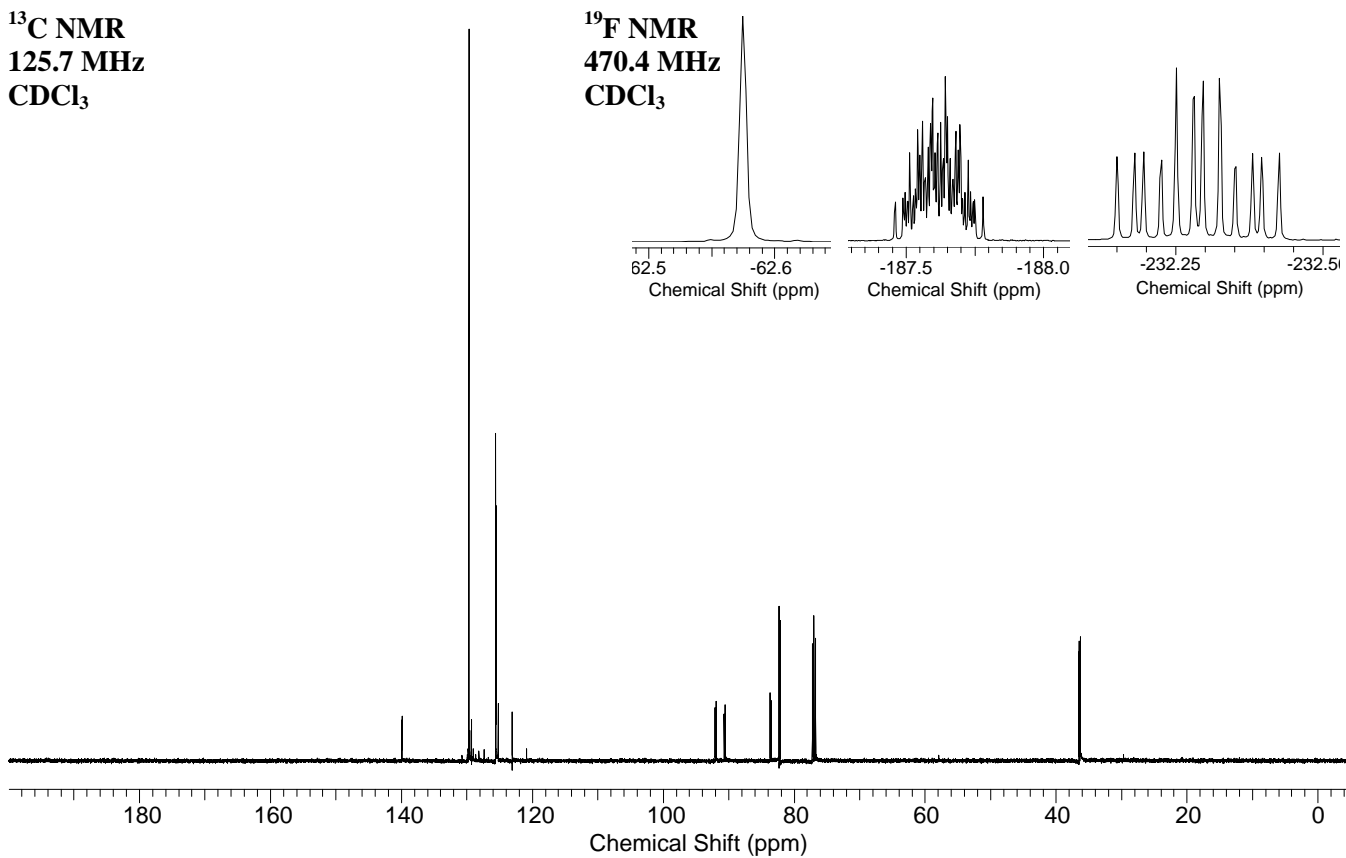

**<sup>1</sup>H NMR**  
**500 MHz**  
**CDCl<sub>3</sub>**

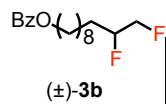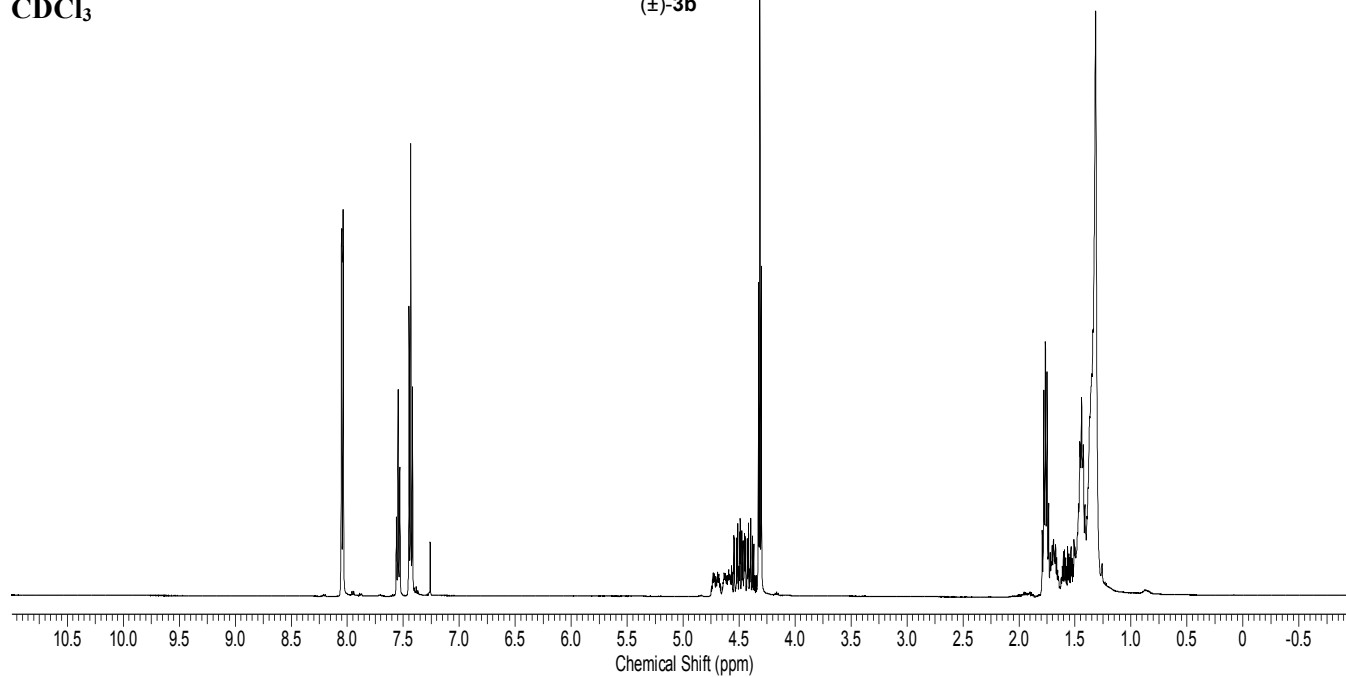

**<sup>13</sup>C NMR**  
**125.7 MHz**  
**CDCl<sub>3</sub>**

**<sup>19</sup>F NMR**  
**470.4 MHz**  
**CDCl<sub>3</sub>**

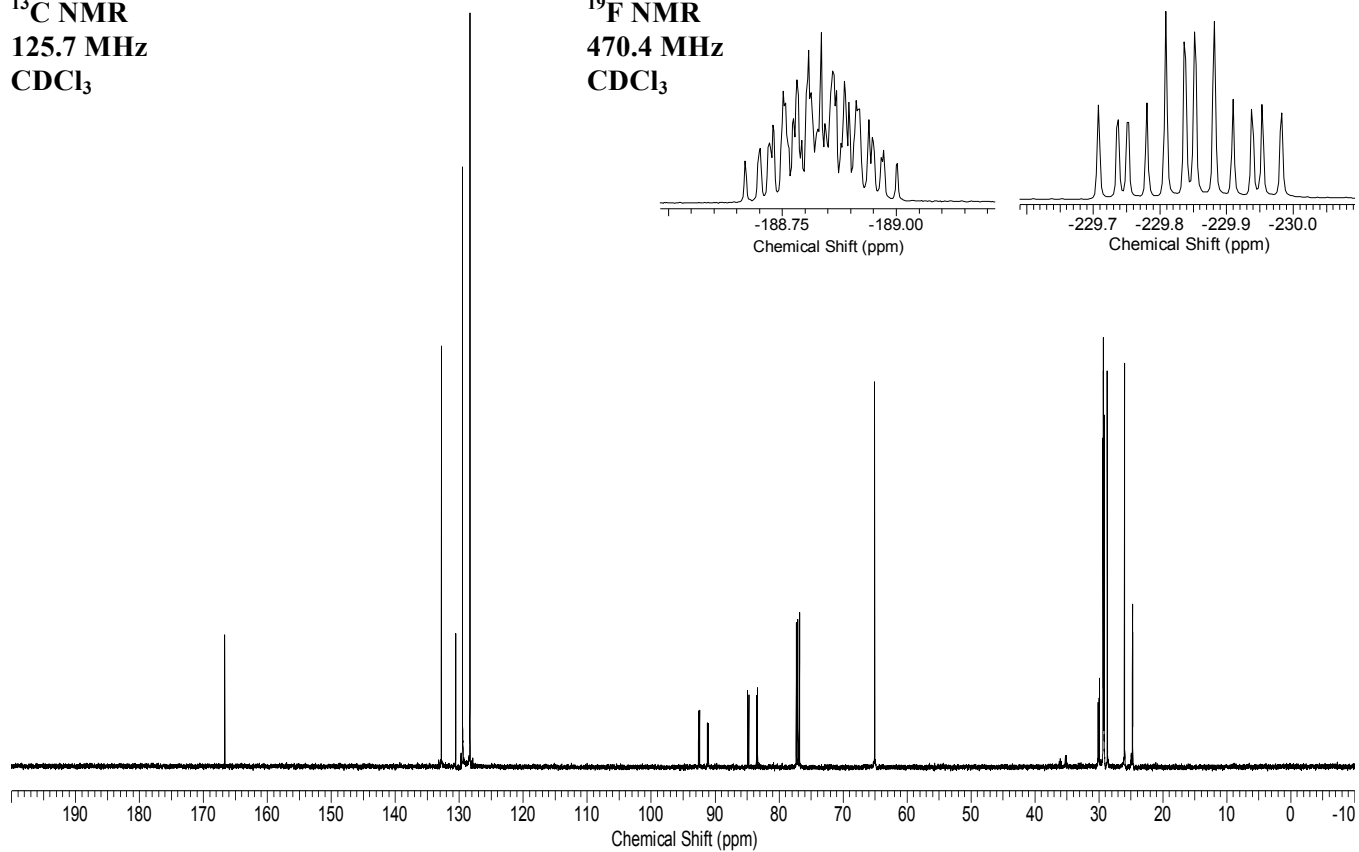



**<sup>1</sup>H NMR**  
**500 MHz**  
**CDCl<sub>3</sub>**

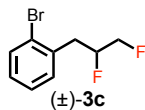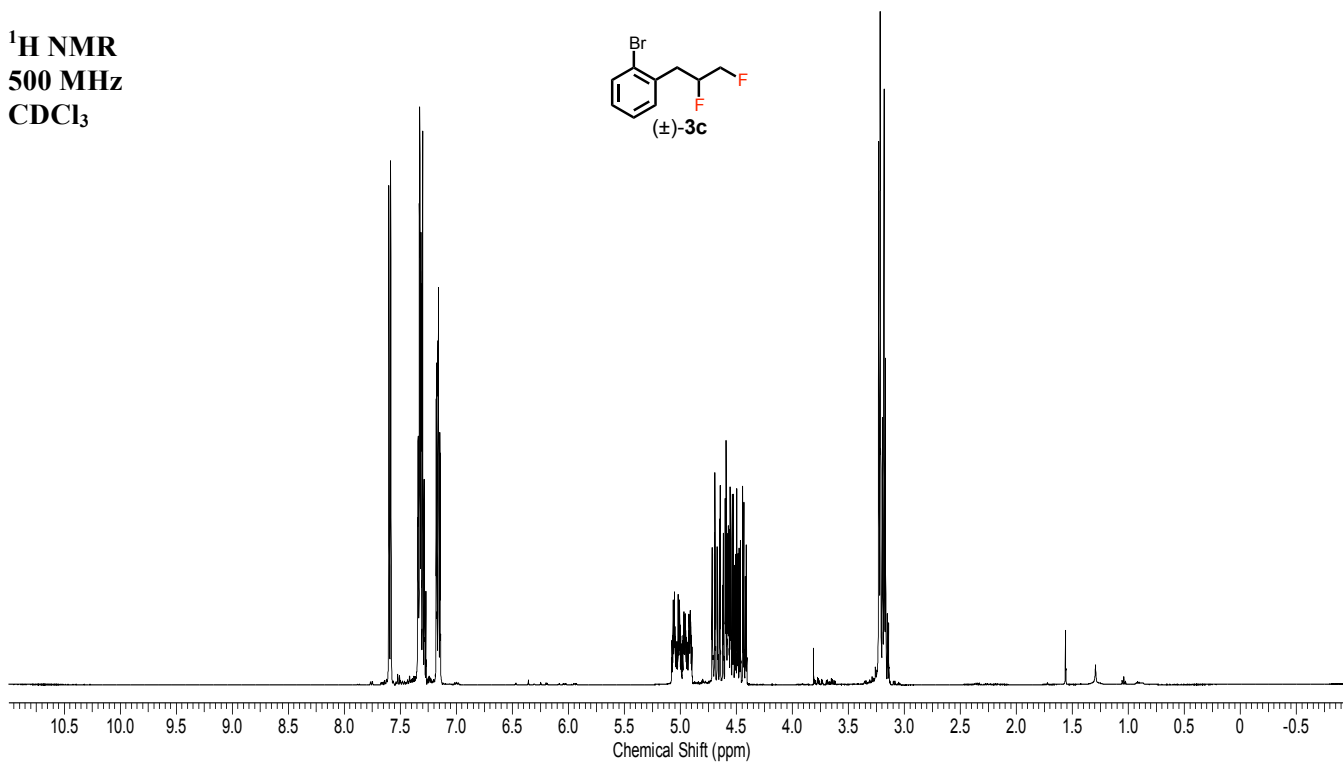

**<sup>13</sup>C NMR**  
**125.7 MHz**  
**CDCl<sub>3</sub>**

**<sup>19</sup>F NMR**  
**470.4 MHz**  
**CDCl<sub>3</sub>**

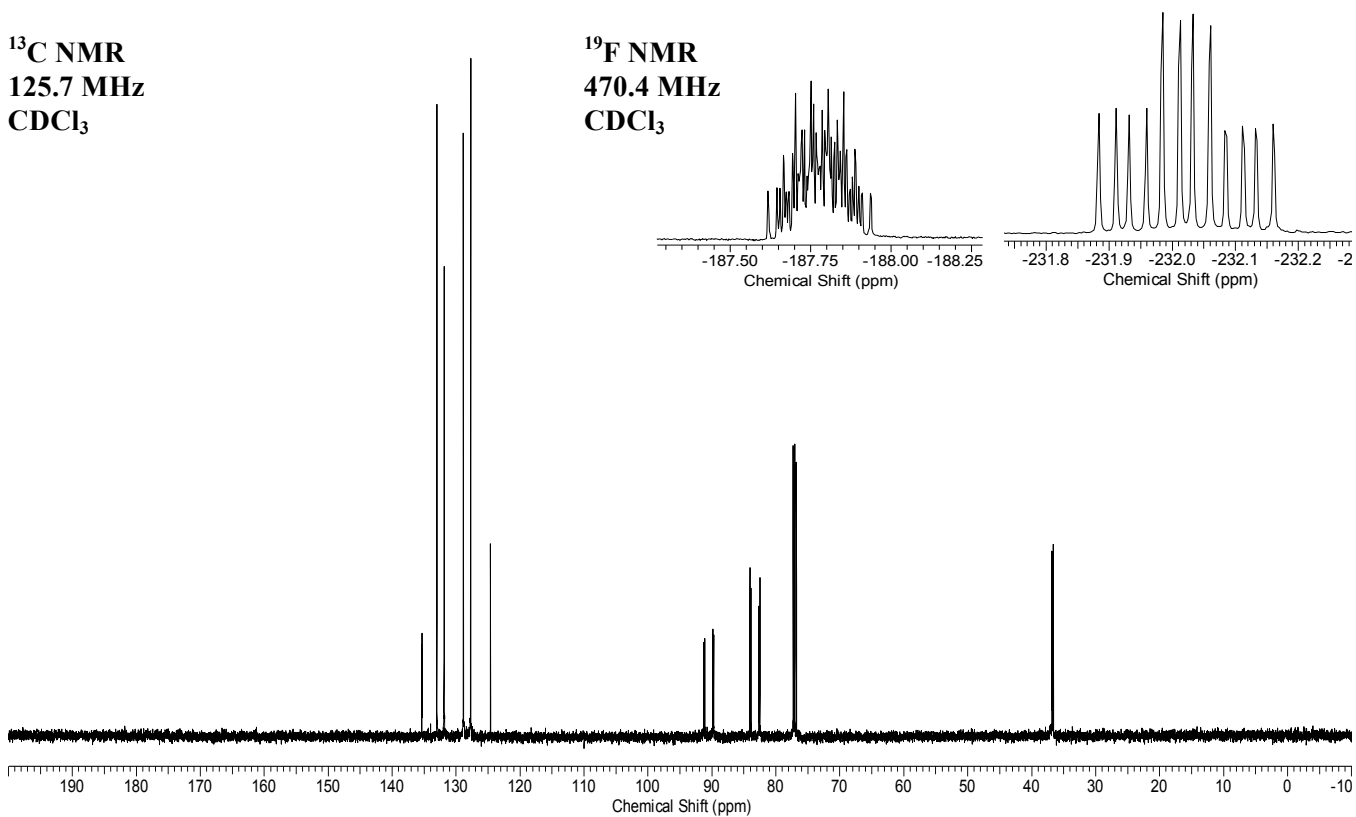

**<sup>1</sup>H NMR**  
**500 MHz**  
**CDCl<sub>3</sub>**

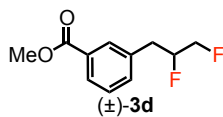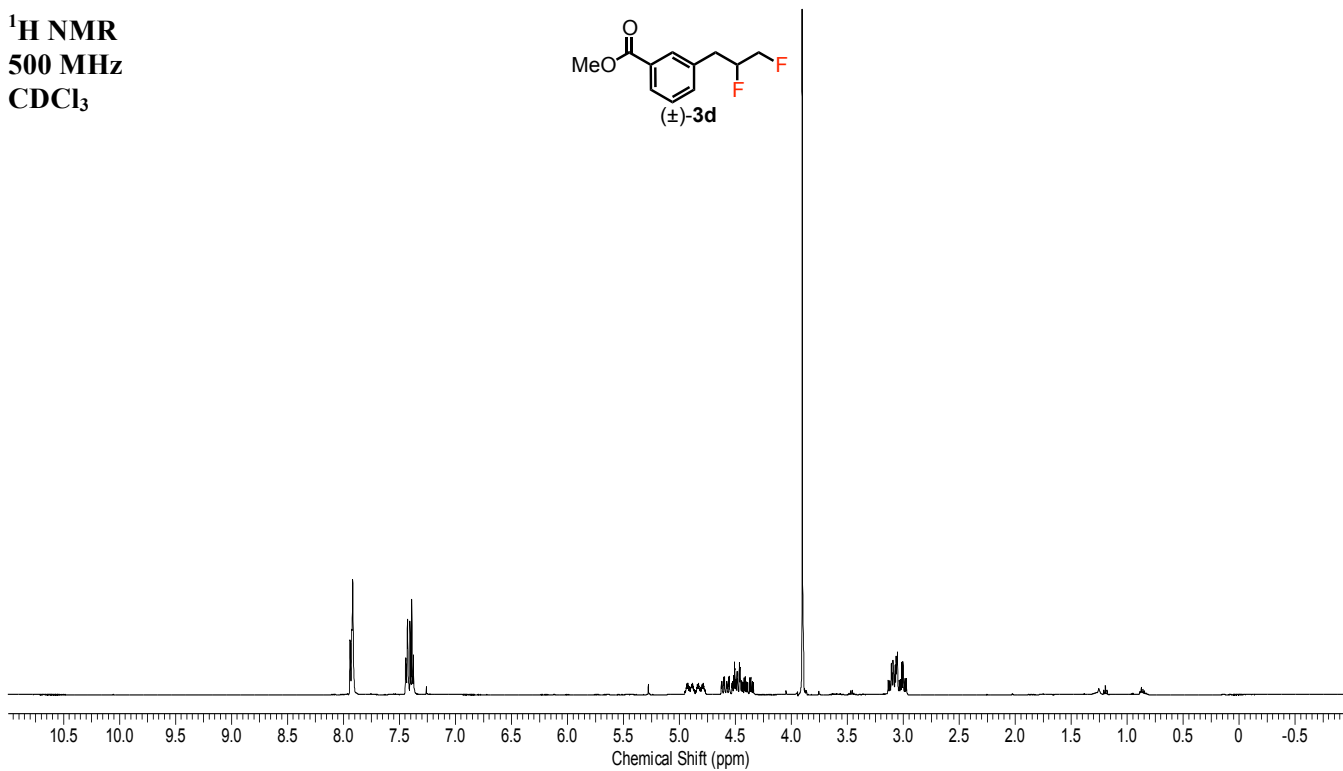

**<sup>13</sup>C NMR**  
**125.7 MHz**  
**CDCl<sub>3</sub>**

**<sup>19</sup>F NMR**  
**470.4 MHz**  
**CDCl<sub>3</sub>**

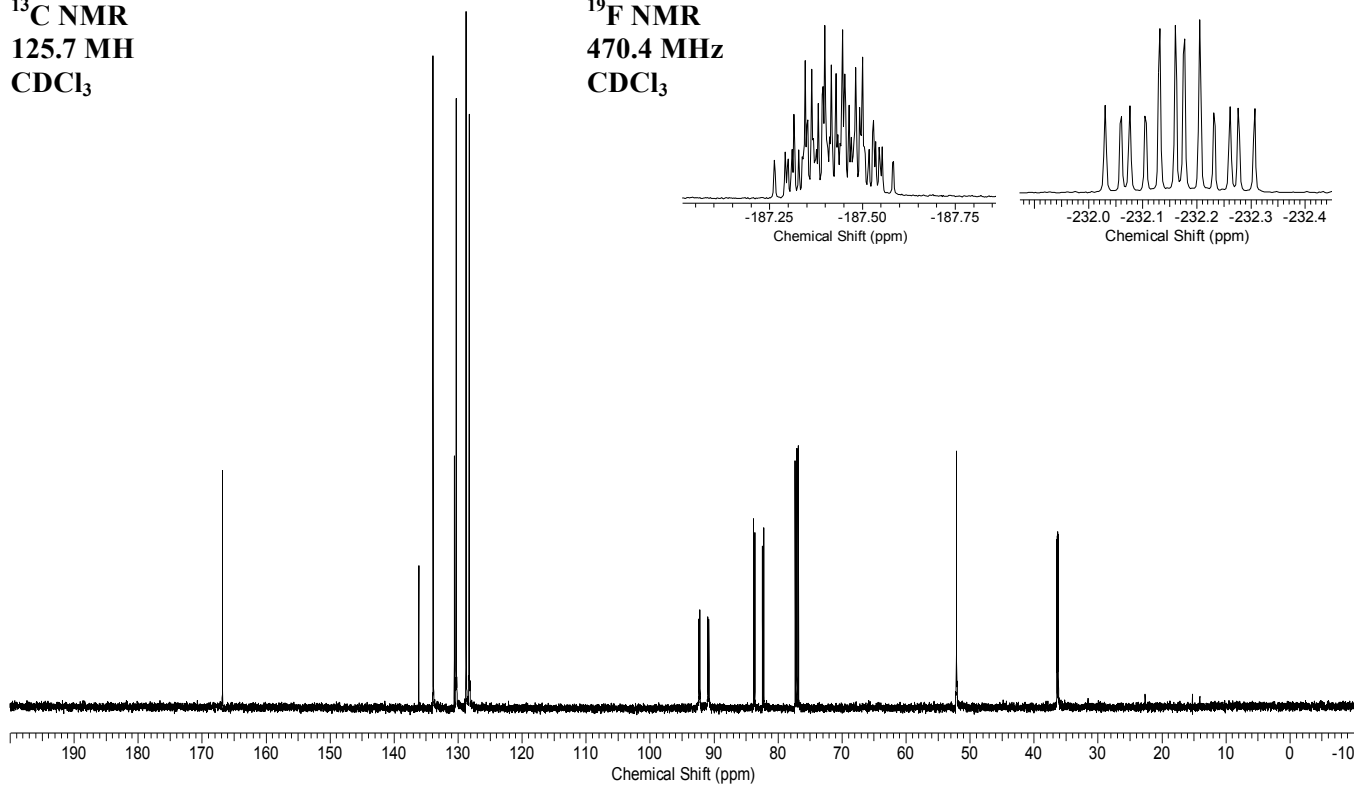

**<sup>1</sup>H NMR**  
**500 MHz**  
**CDCl<sub>3</sub>**

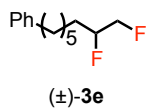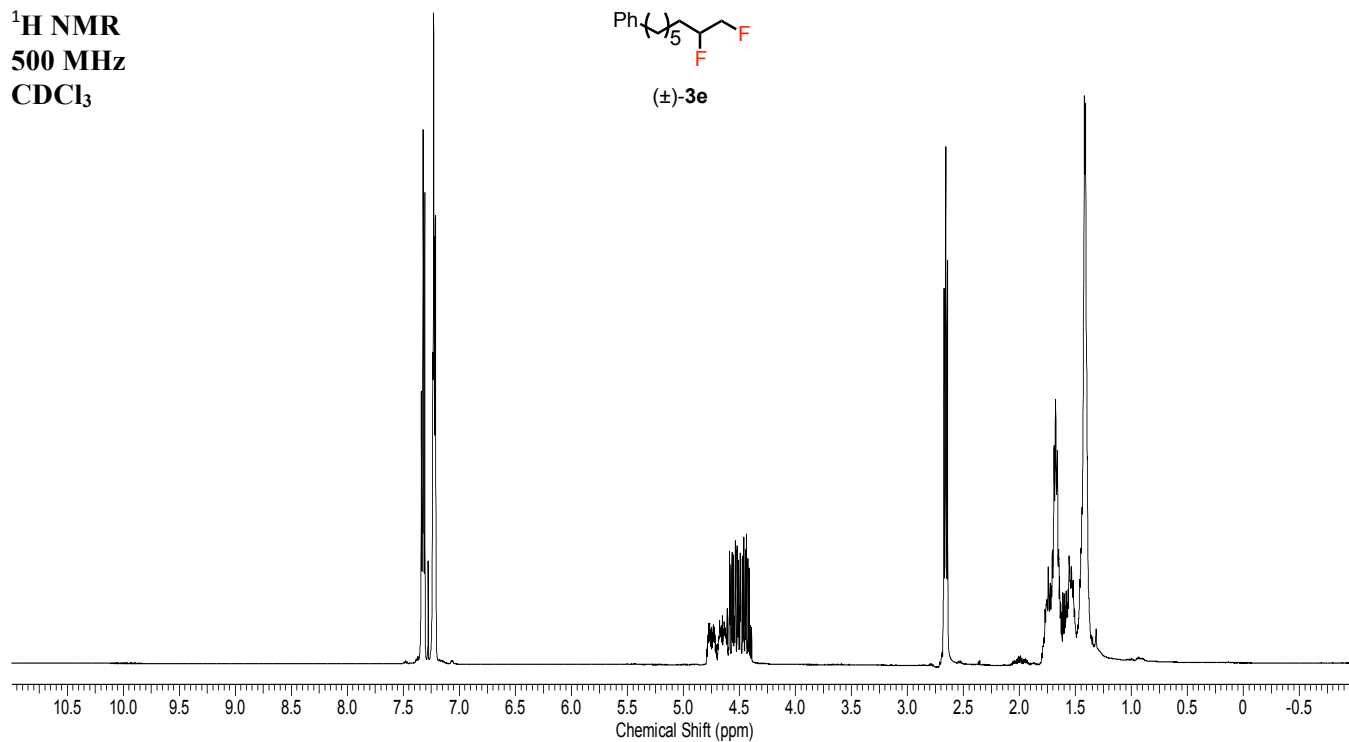

**<sup>13</sup>C NMR**  
**125.7 MHz**  
**CDCl<sub>3</sub>**

**<sup>19</sup>F NMR**  
**470.4 MHz**  
**CDCl<sub>3</sub>**

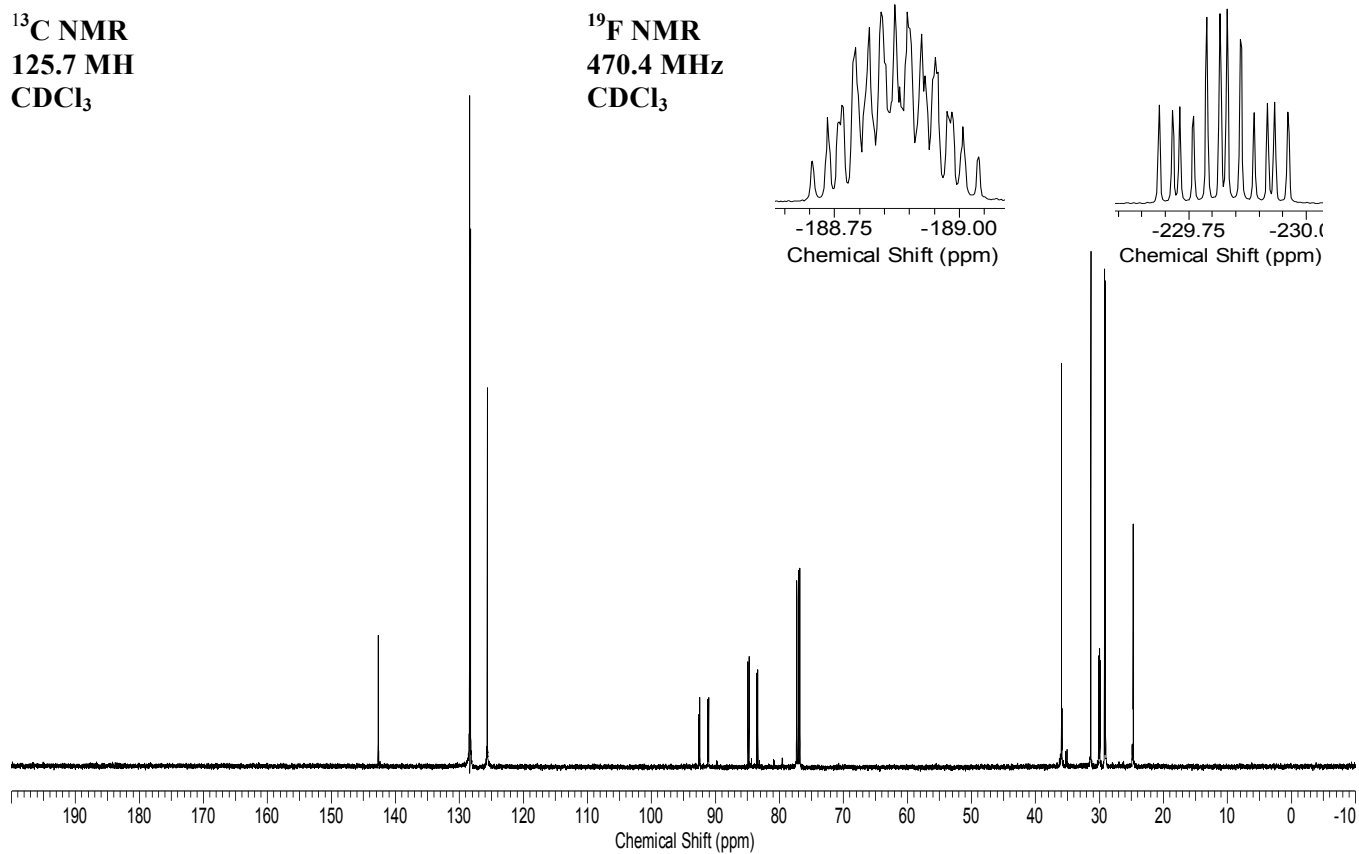

**<sup>1</sup>H NMR**  
**500 MHz**  
**CDCl<sub>3</sub>**

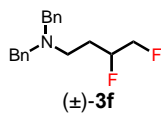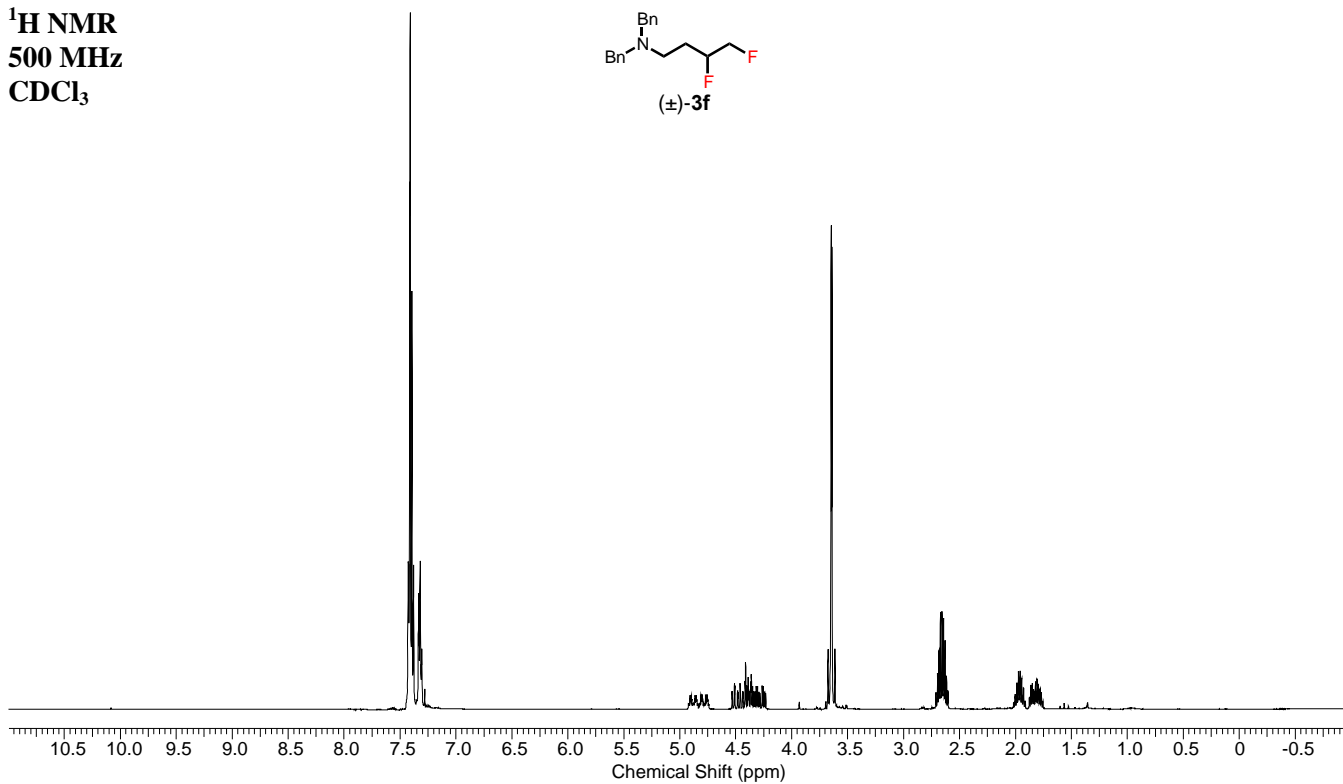

**<sup>13</sup>C NMR**  
**125.7 MHz**  
**CDCl<sub>3</sub>**

**<sup>19</sup>F NMR**  
**470.4 MHz**  
**CDCl<sub>3</sub>**

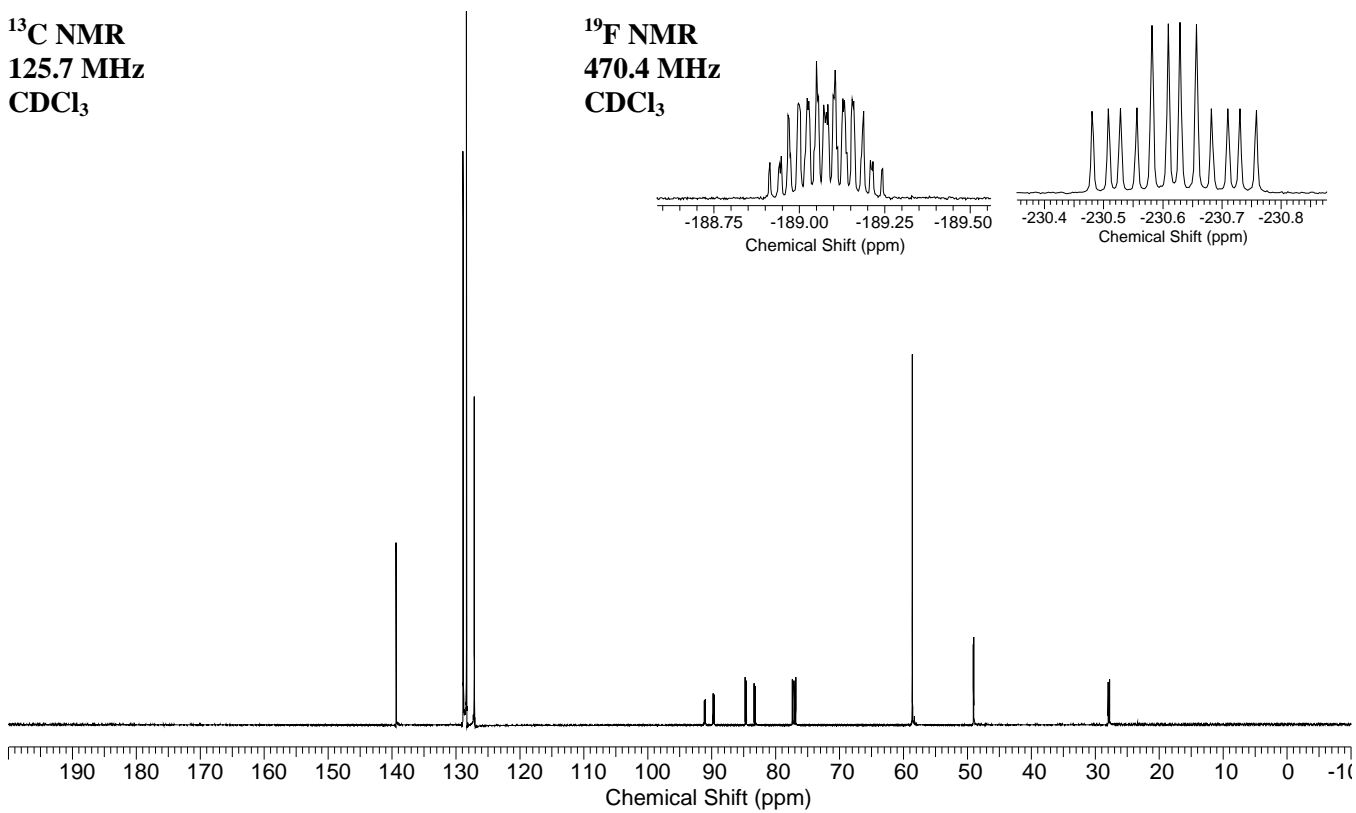

**<sup>1</sup>H NMR**  
**500 MHz**  
**CDCl<sub>3</sub>**

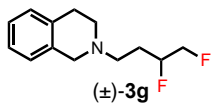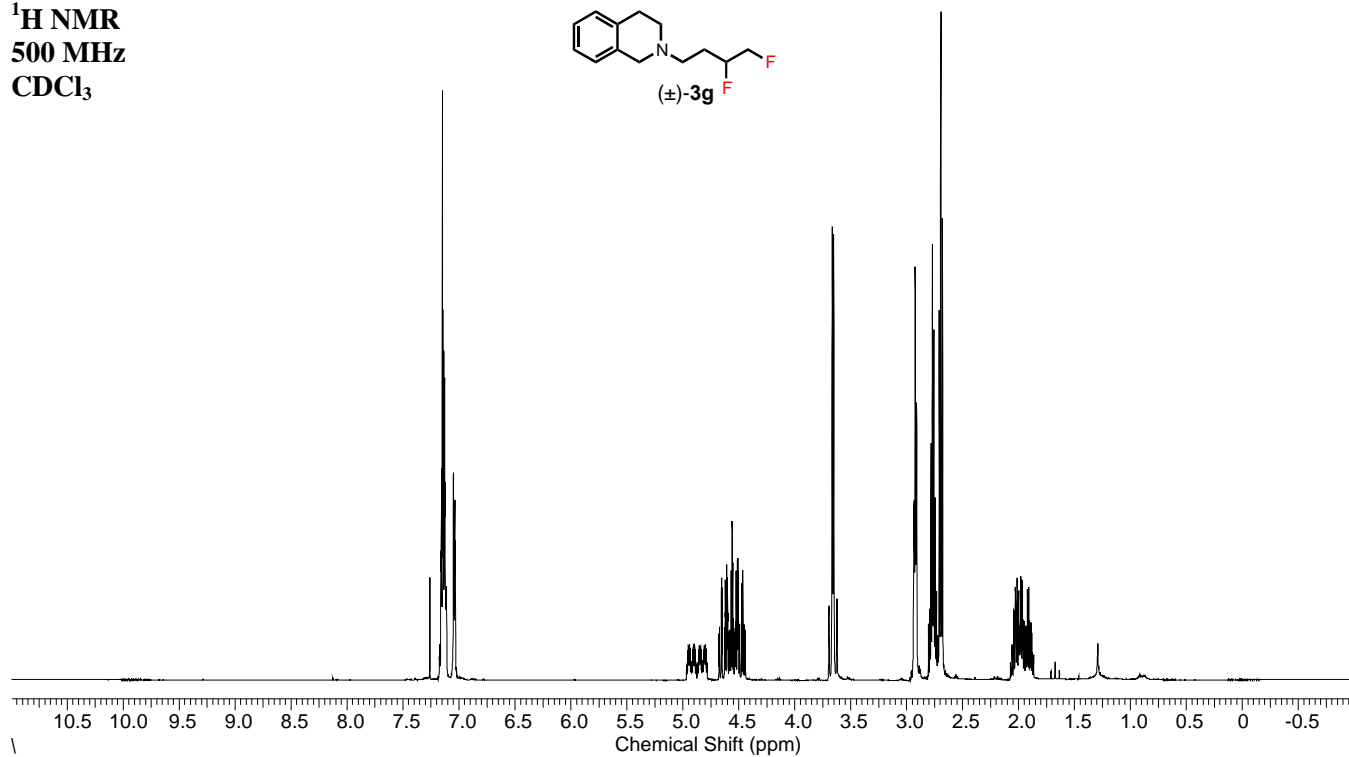

**<sup>13</sup>C NMR**  
**125.7 MHz**  
**CDCl<sub>3</sub>**

**<sup>19</sup>F NMR**  
**470.4 MHz**  
**CDCl<sub>3</sub>**

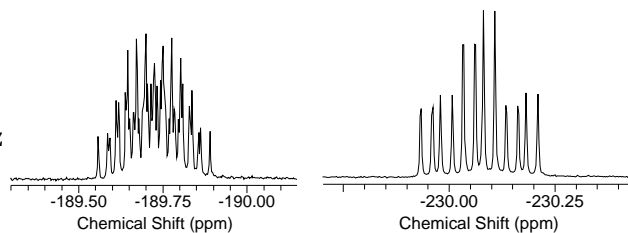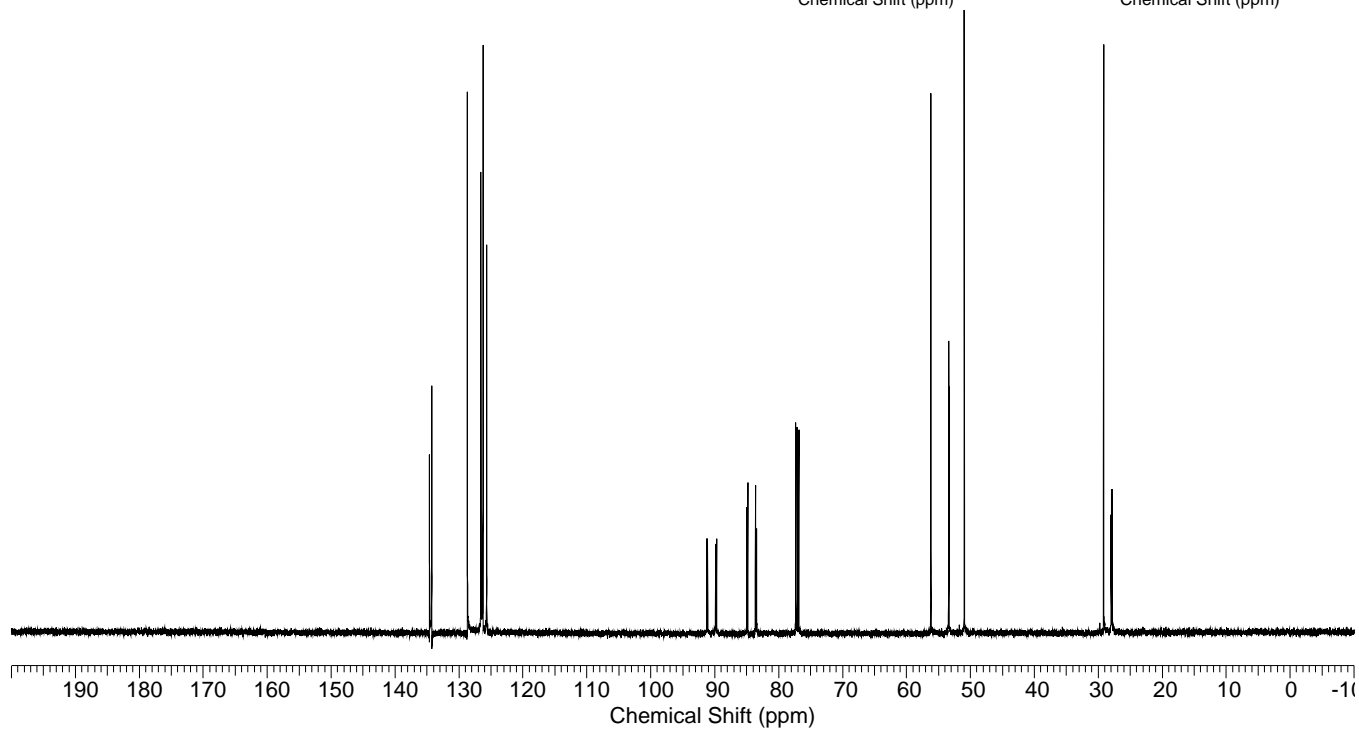

**<sup>1</sup>H NMR**  
**500 MHz**  
**CDCl<sub>3</sub>**

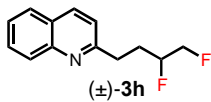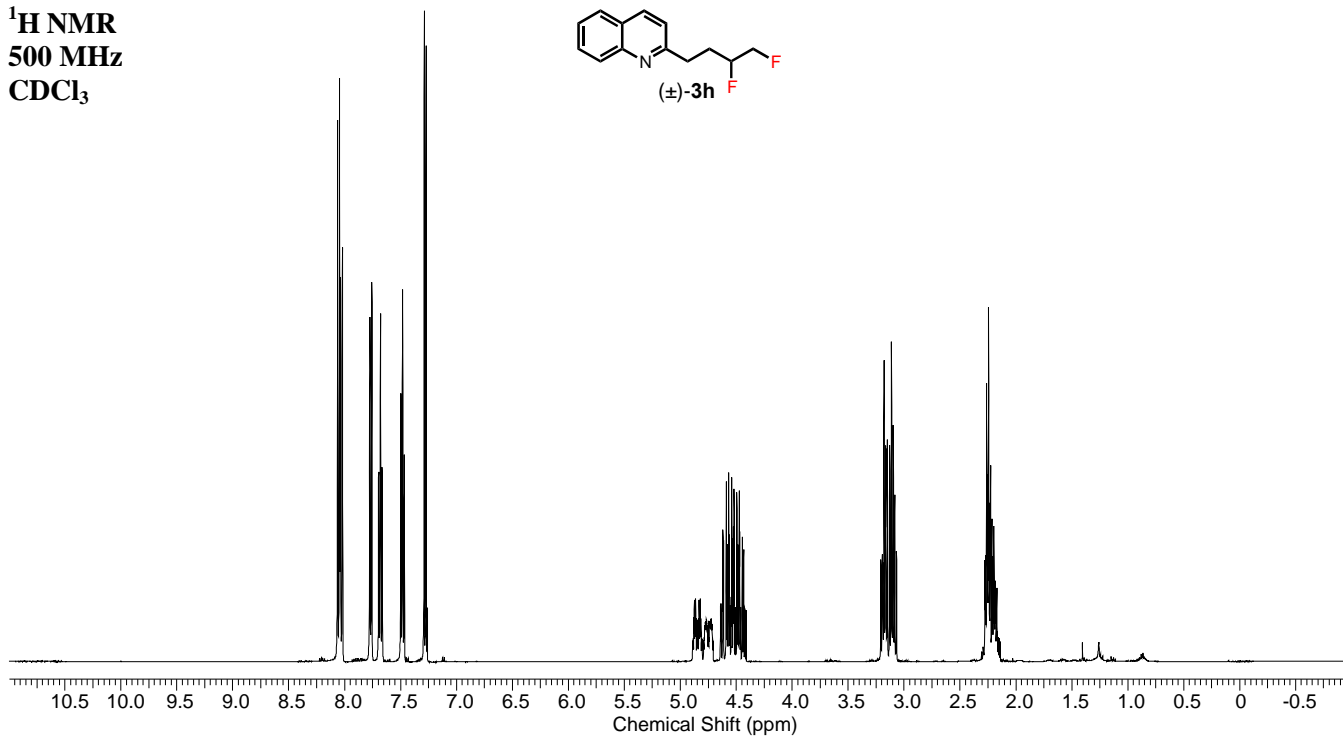

**<sup>13</sup>C NMR**  
**125.7 MHz**  
**CDCl<sub>3</sub>**

**<sup>19</sup>F NMR**  
**470.4 MHz**  
**CDCl<sub>3</sub>**

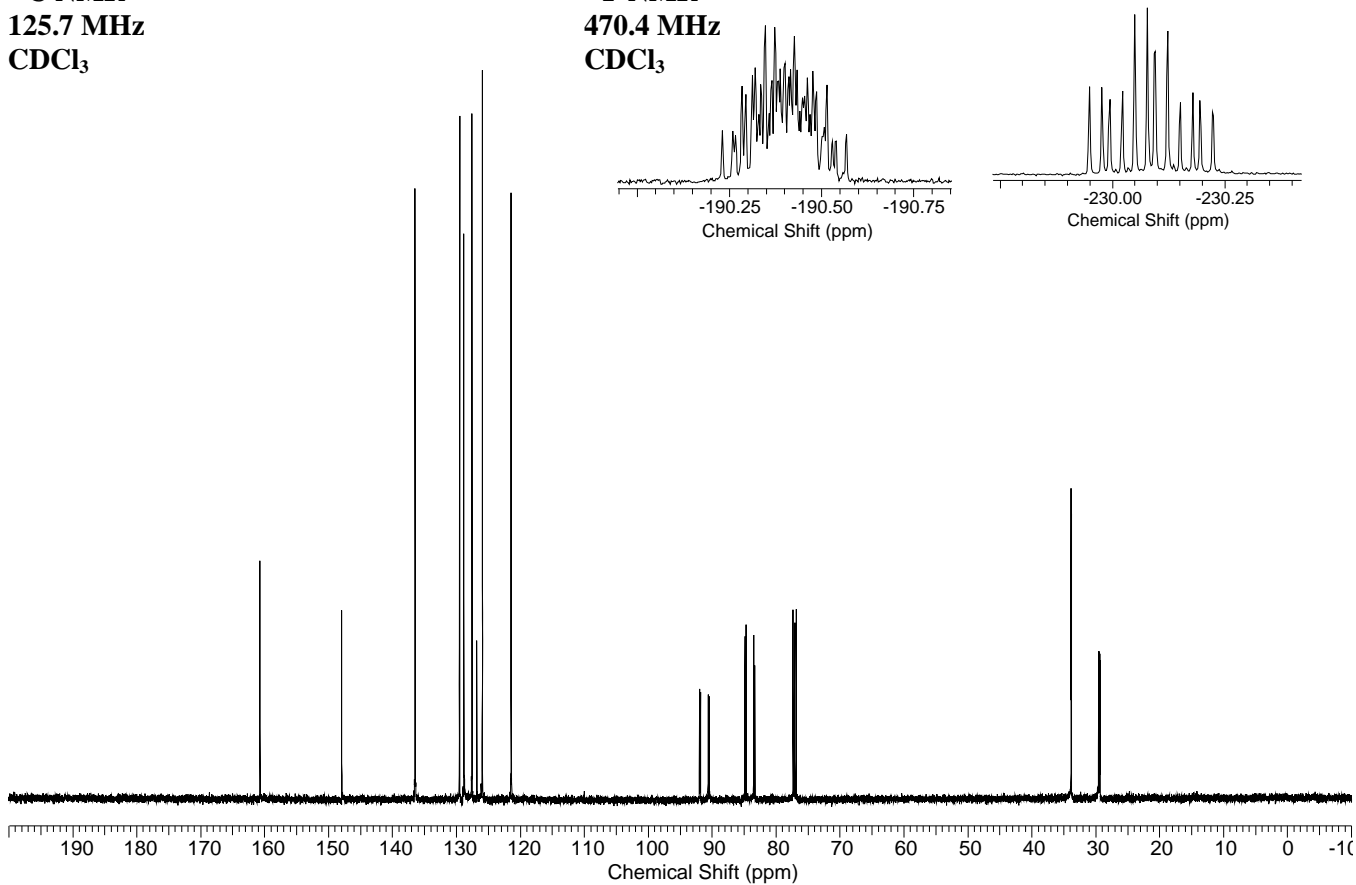

**<sup>1</sup>H NMR**  
**500 MHz**  
**CDCl<sub>3</sub>**

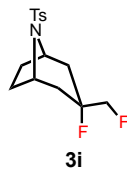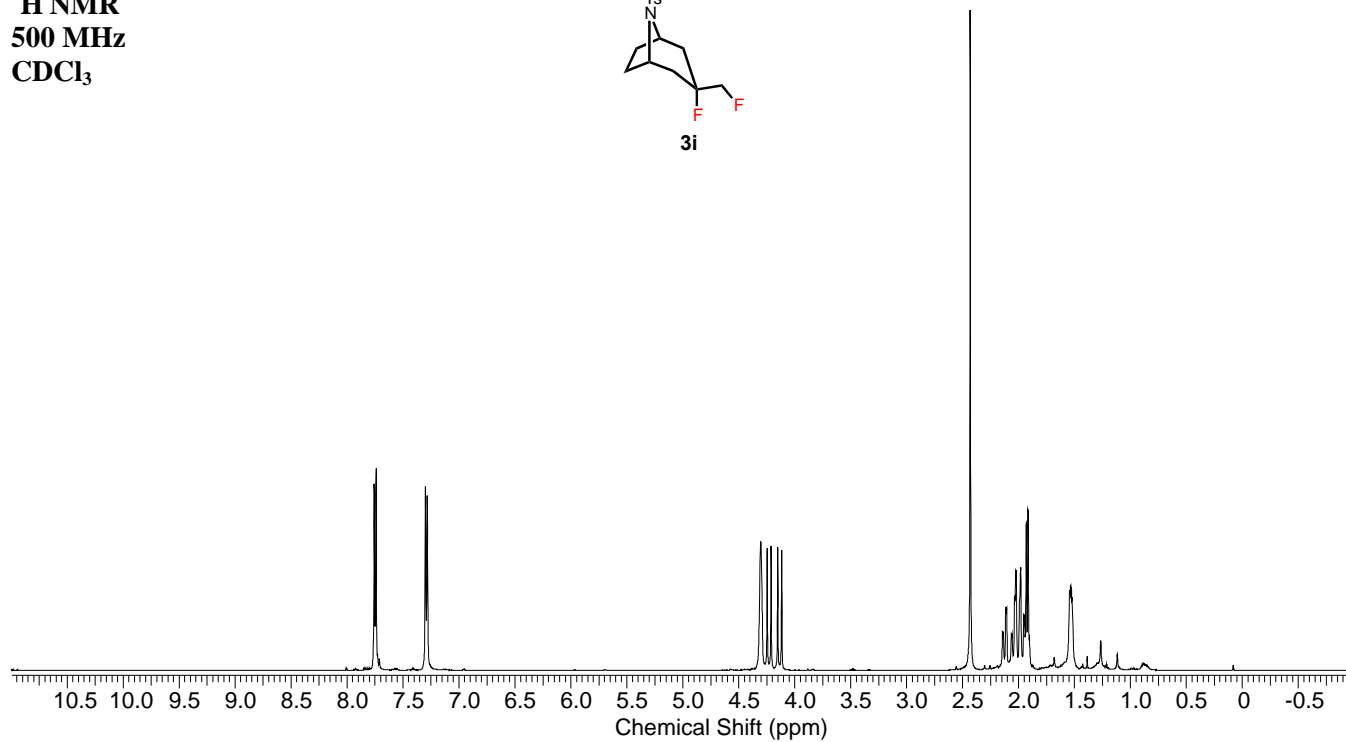

**<sup>13</sup>C NMR**  
**125.7 MHz**  
**CDCl<sub>3</sub>**

**<sup>19</sup>F NMR**  
**470.4 MHz**  
**CDCl<sub>3</sub>**

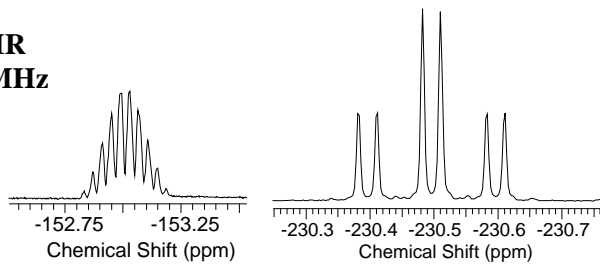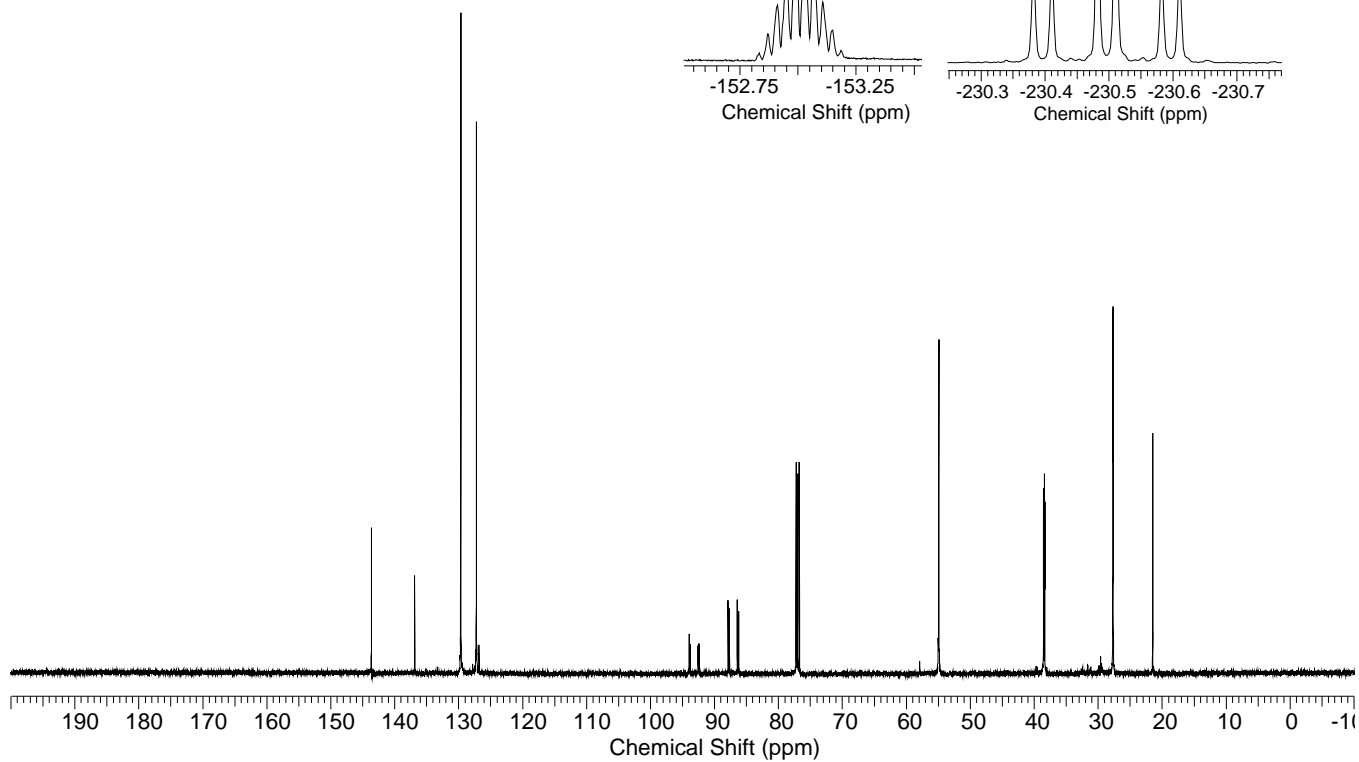

**<sup>1</sup>H NMR**  
500 MHz  
CDCl<sub>3</sub>

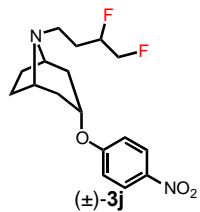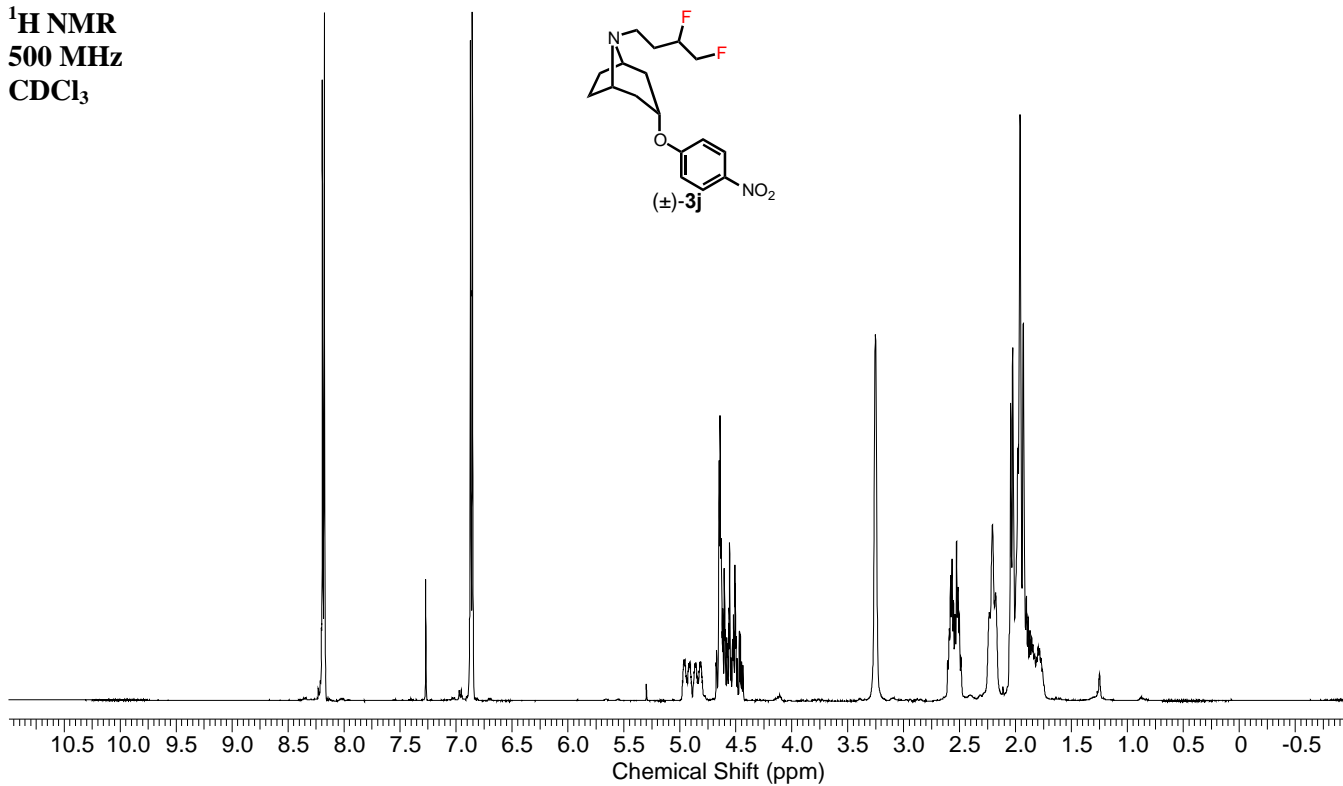

**<sup>13</sup>C NMR**  
125.7 MHz  
CDCl<sub>3</sub>

**<sup>19</sup>F NMR**  
470.4 MHz  
CDCl<sub>3</sub>

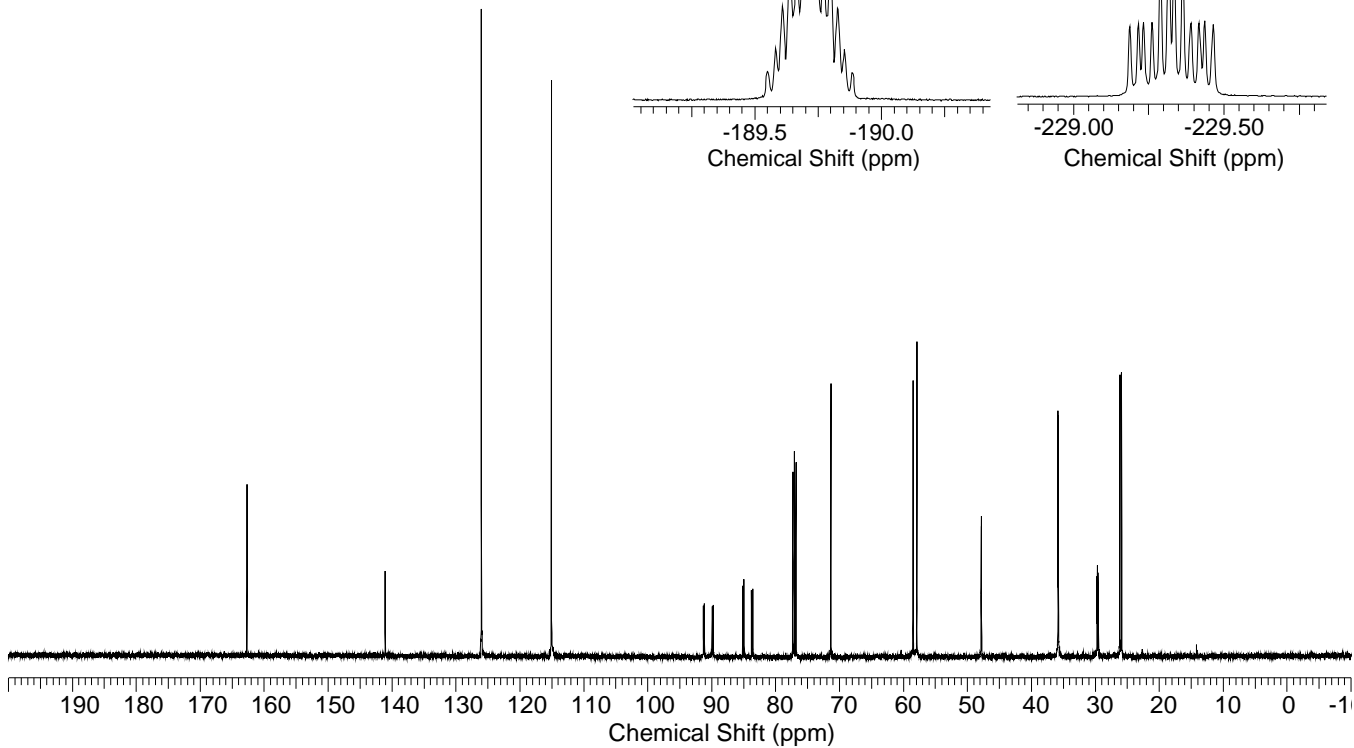



**<sup>1</sup>H NMR**  
**500 MHz**  
**CDCl<sub>3</sub>**

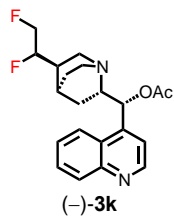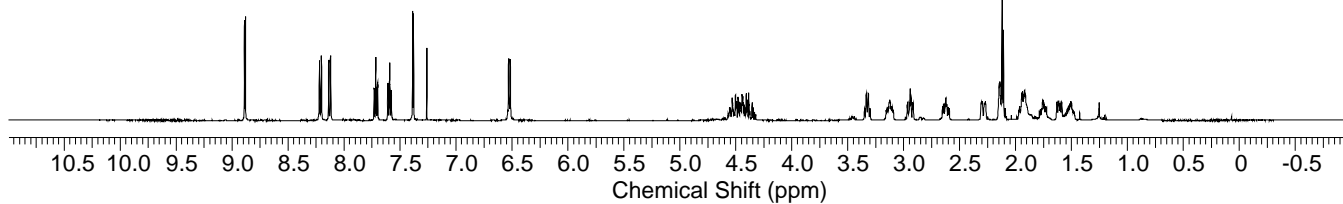

**<sup>13</sup>C NMR**  
**125.7 MHz**  
**CDCl<sub>3</sub>**

**<sup>19</sup>F NMR**  
**470.4 MHz**  
**CDCl<sub>3</sub>**

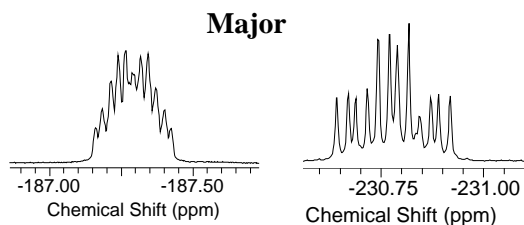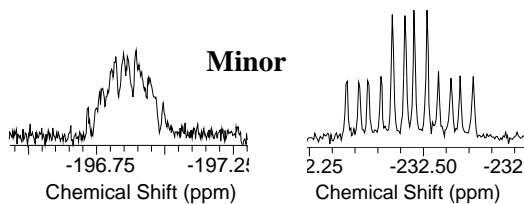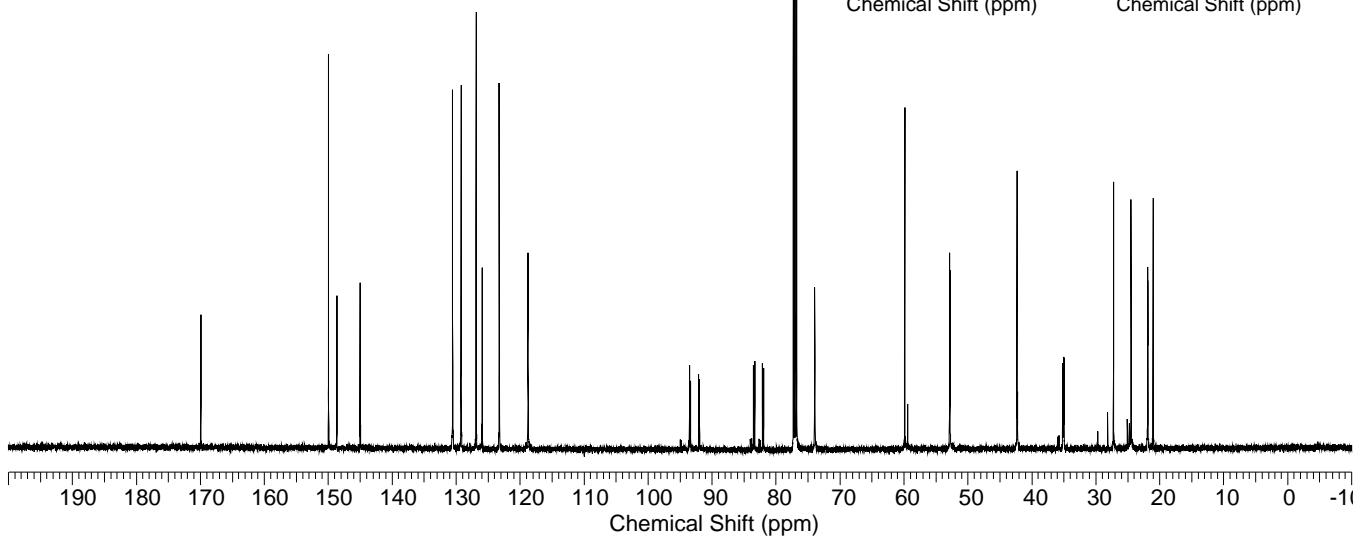

**<sup>1</sup>H NMR**  
**500 MHz**  
**CDCl<sub>3</sub>**

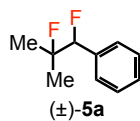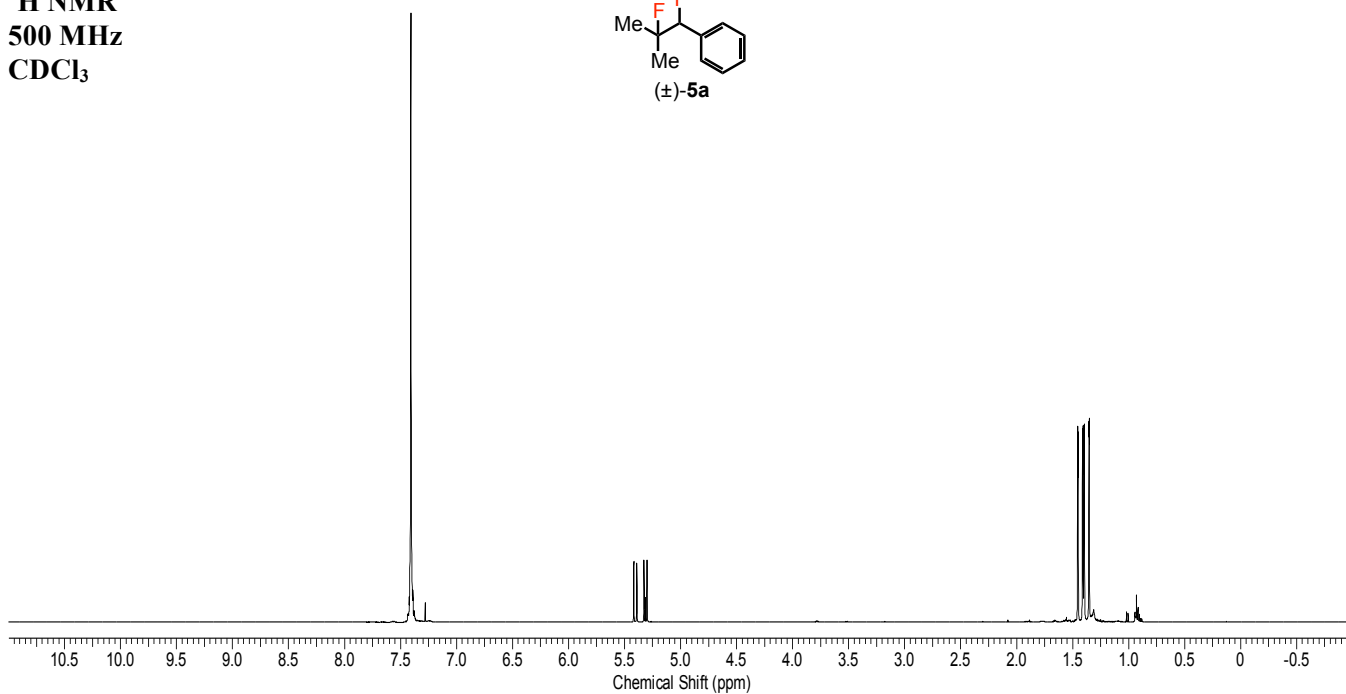

**<sup>13</sup>C NMR**  
**125.7 MHz**  
**CDCl<sub>3</sub>**

**<sup>19</sup>F NMR**  
**470.4 MHz**  
**CDCl<sub>3</sub>**

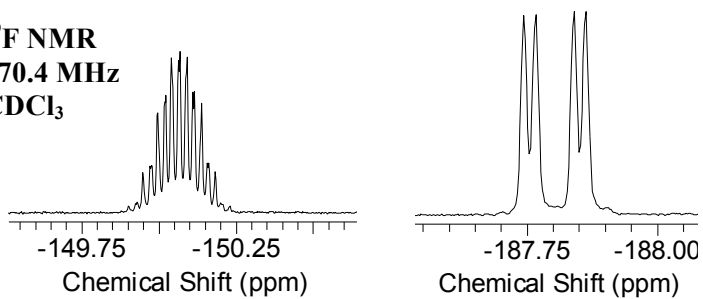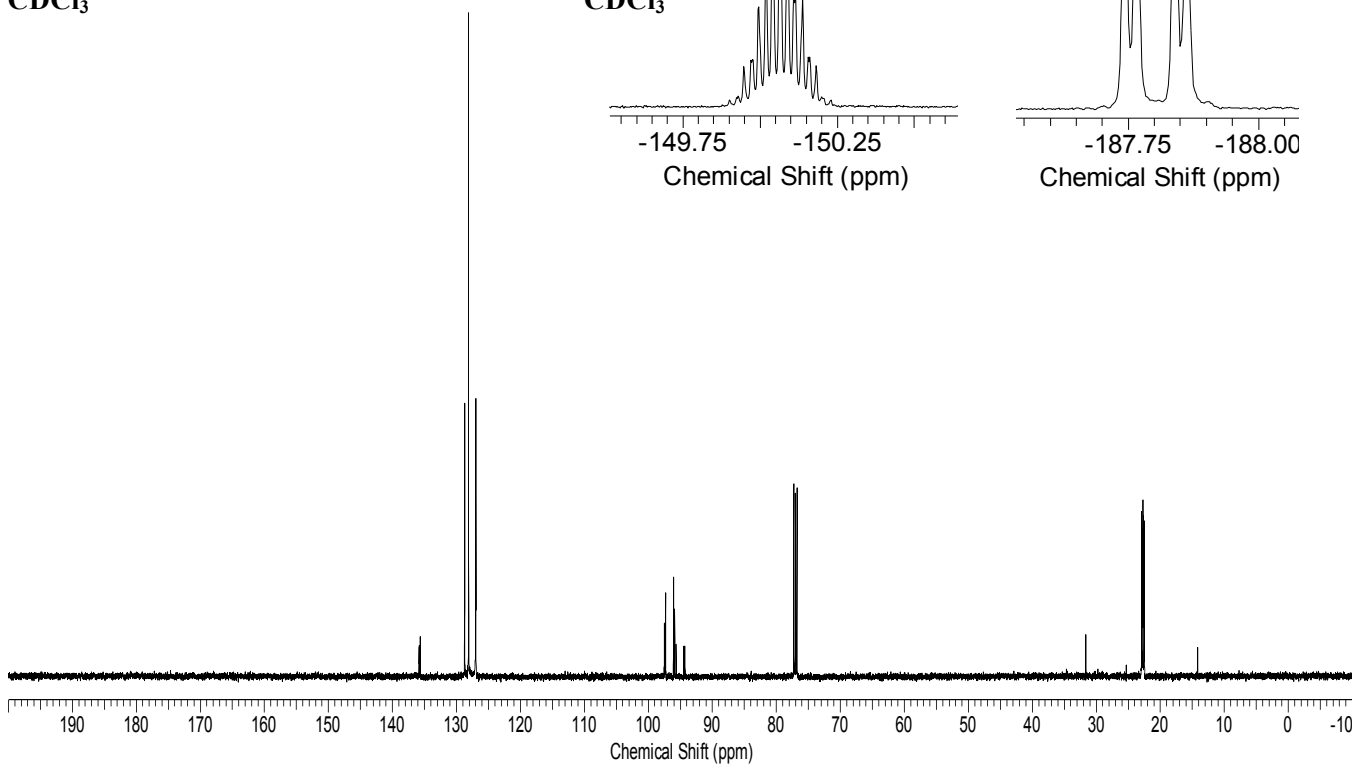

**<sup>1</sup>H NMR**  
**500 MHz**  
**CDCl<sub>3</sub>**

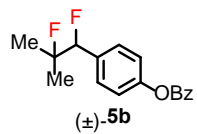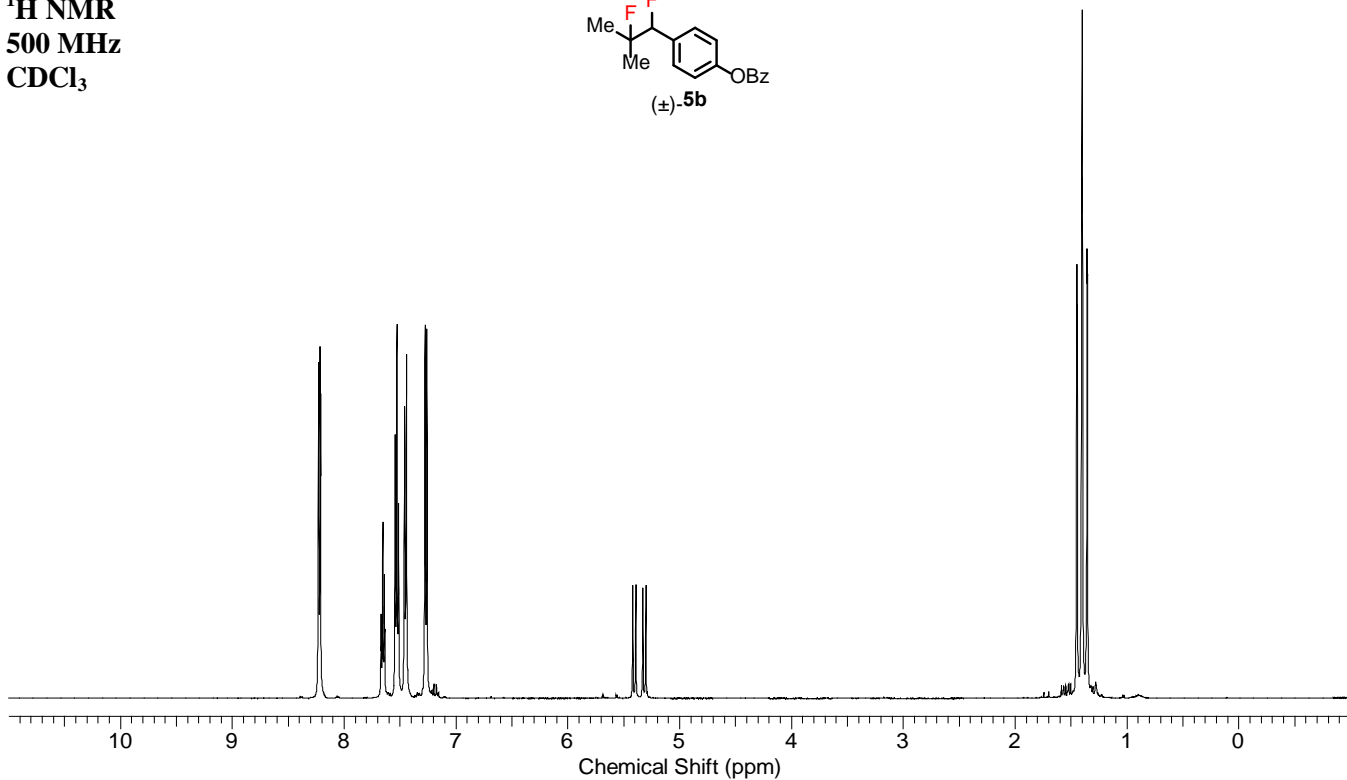

**<sup>13</sup>C NMR**  
**125.7 MHz**  
**CDCl<sub>3</sub>**

**<sup>19</sup>F NMR**  
**376.3 MHz**  
**CDCl<sub>3</sub>**

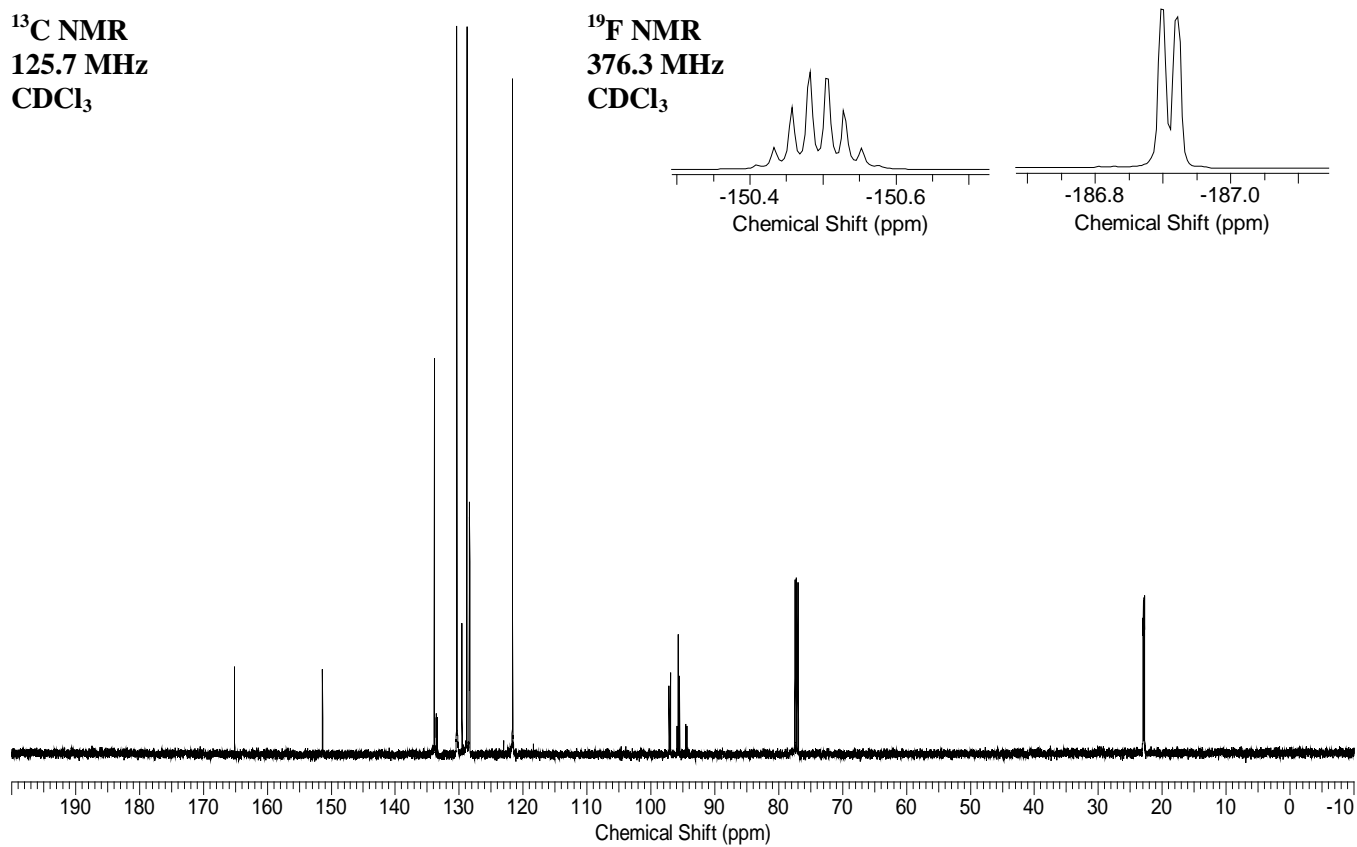

**<sup>1</sup>H NMR**  
**500 MHz**  
**CDCl<sub>3</sub>**

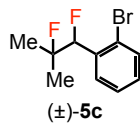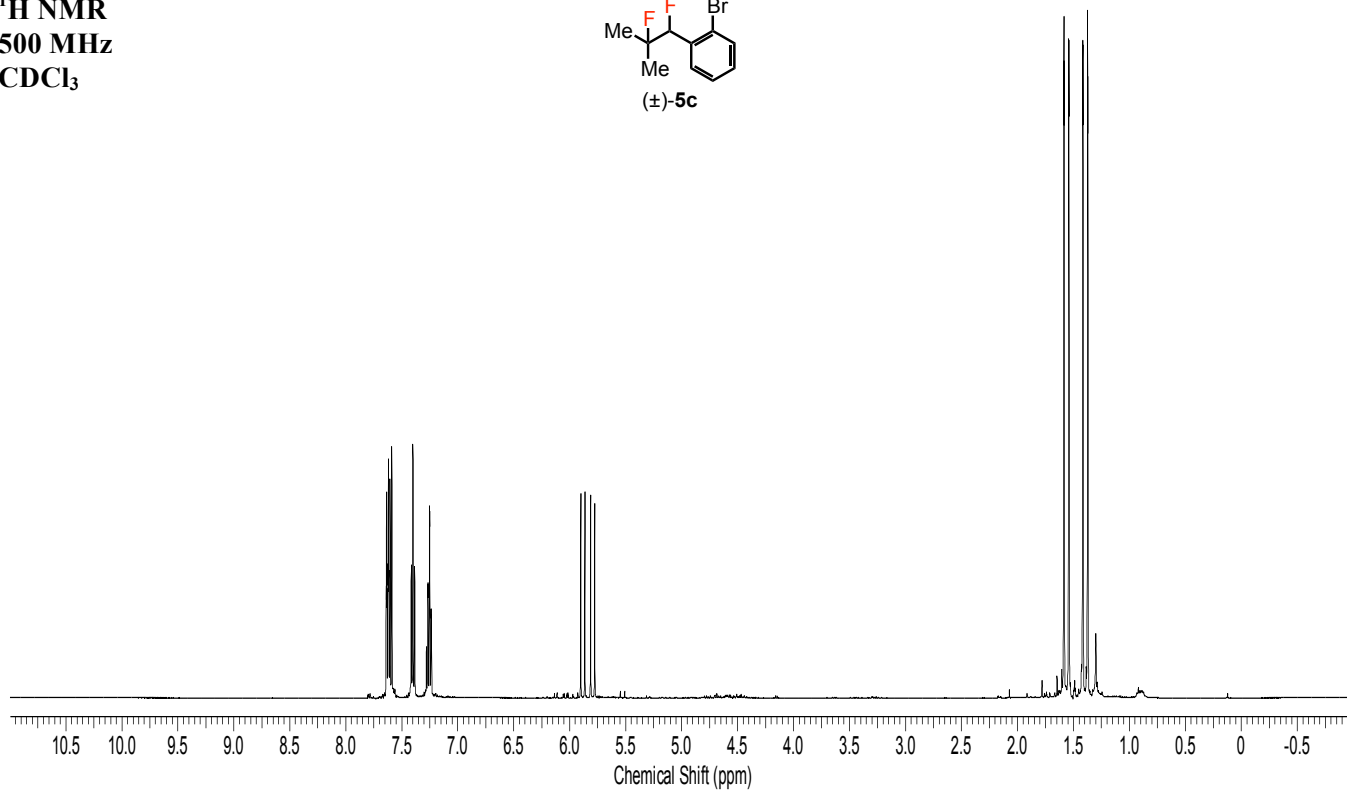

**<sup>13</sup>C NMR**  
**125.7 MHz**  
**CDCl<sub>3</sub>**

**<sup>19</sup>F NMR**  
**470.4 MHz**  
**CDCl<sub>3</sub>**

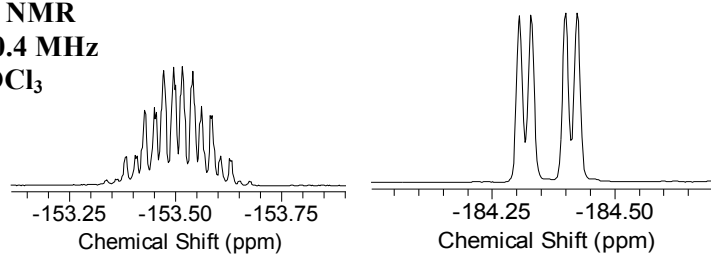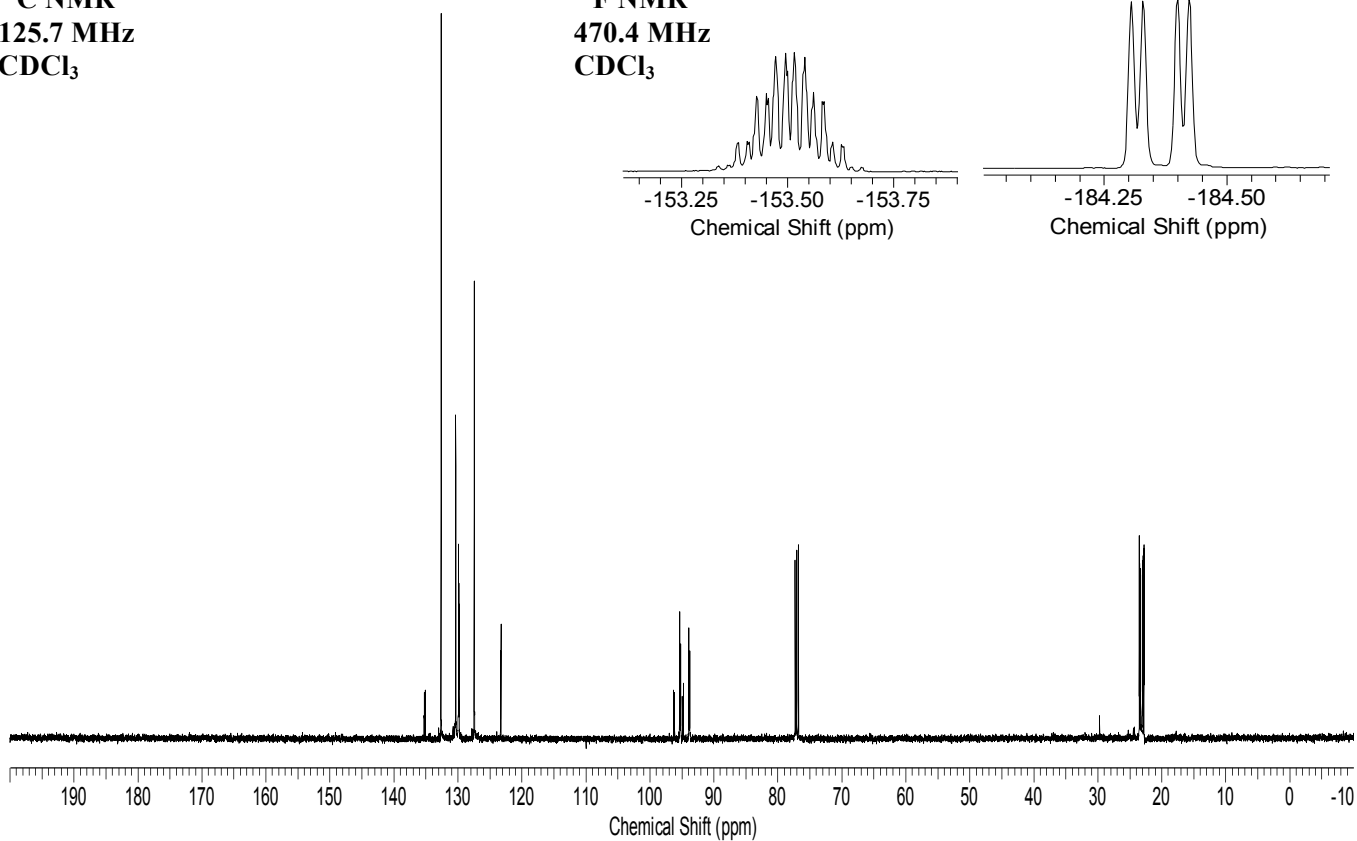

**<sup>1</sup>H NMR**  
**500 MHz**  
**CDCl<sub>3</sub>**

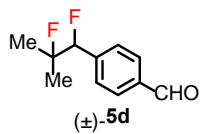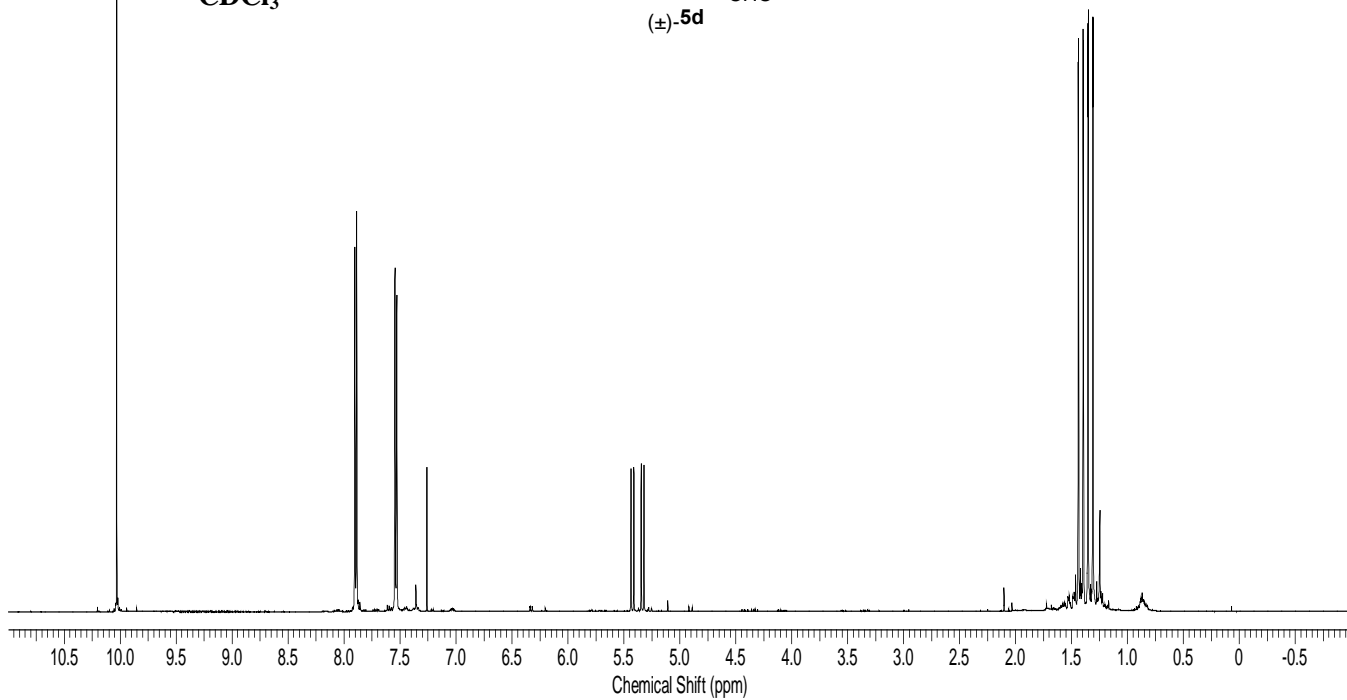

**<sup>13</sup>C NMR**  
**125.7 MHz**  
**CDCl<sub>3</sub>**

**<sup>19</sup>F NMR**  
**376.3 MHz**  
**CDCl<sub>3</sub>**

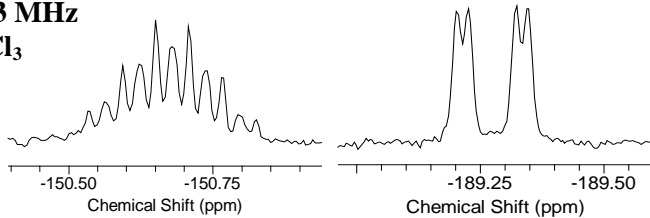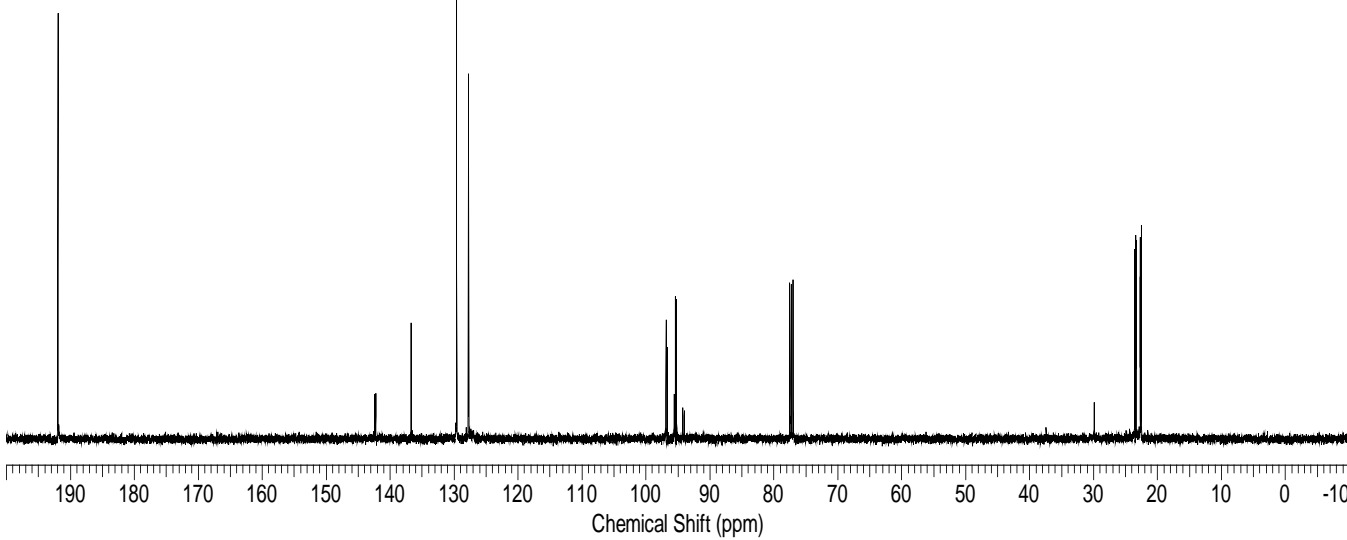

**<sup>1</sup>H NMR**  
**500 MHz**  
**CDCl<sub>3</sub>**

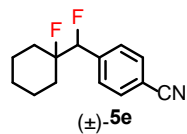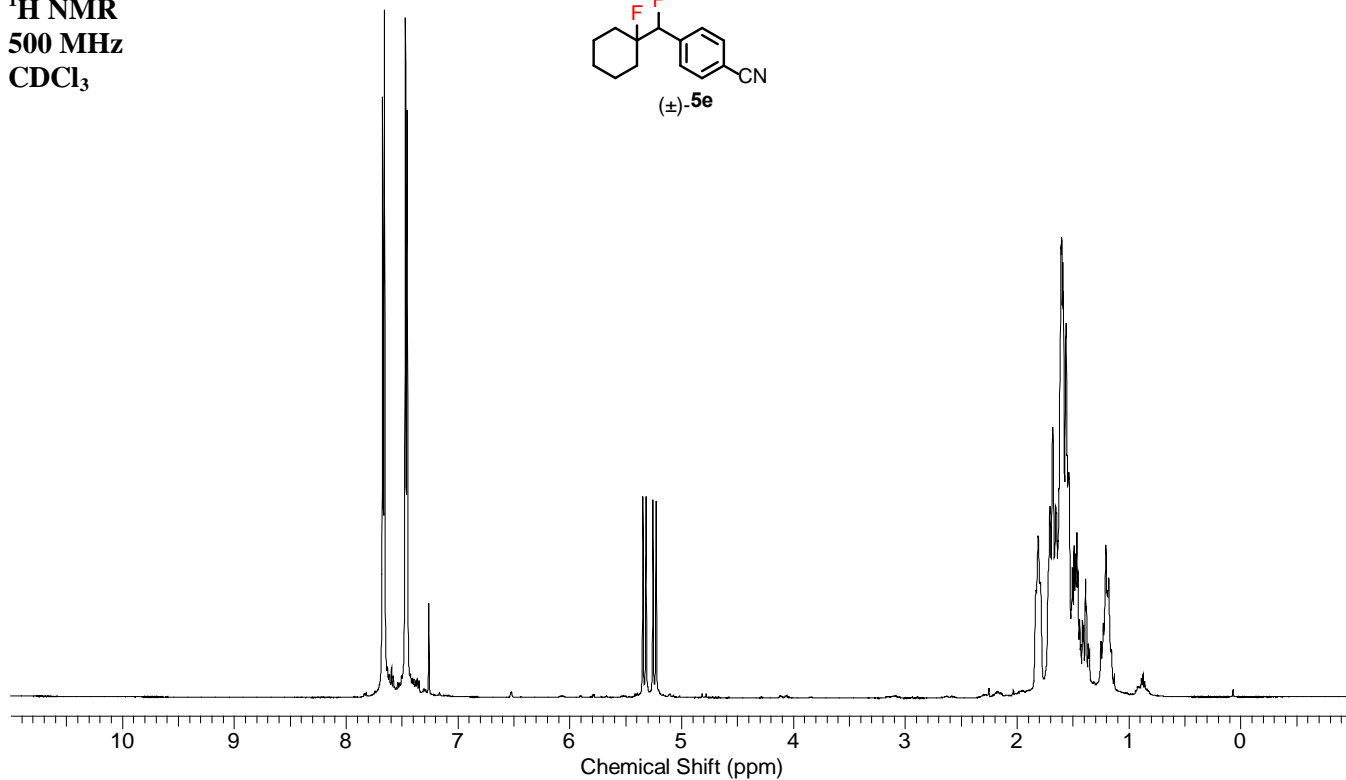

**<sup>13</sup>C NMR**  
**125.7 MHz**  
**CDCl<sub>3</sub>**

**<sup>19</sup>F NMR**  
**470.4 MHz**  
**CDCl<sub>3</sub>**

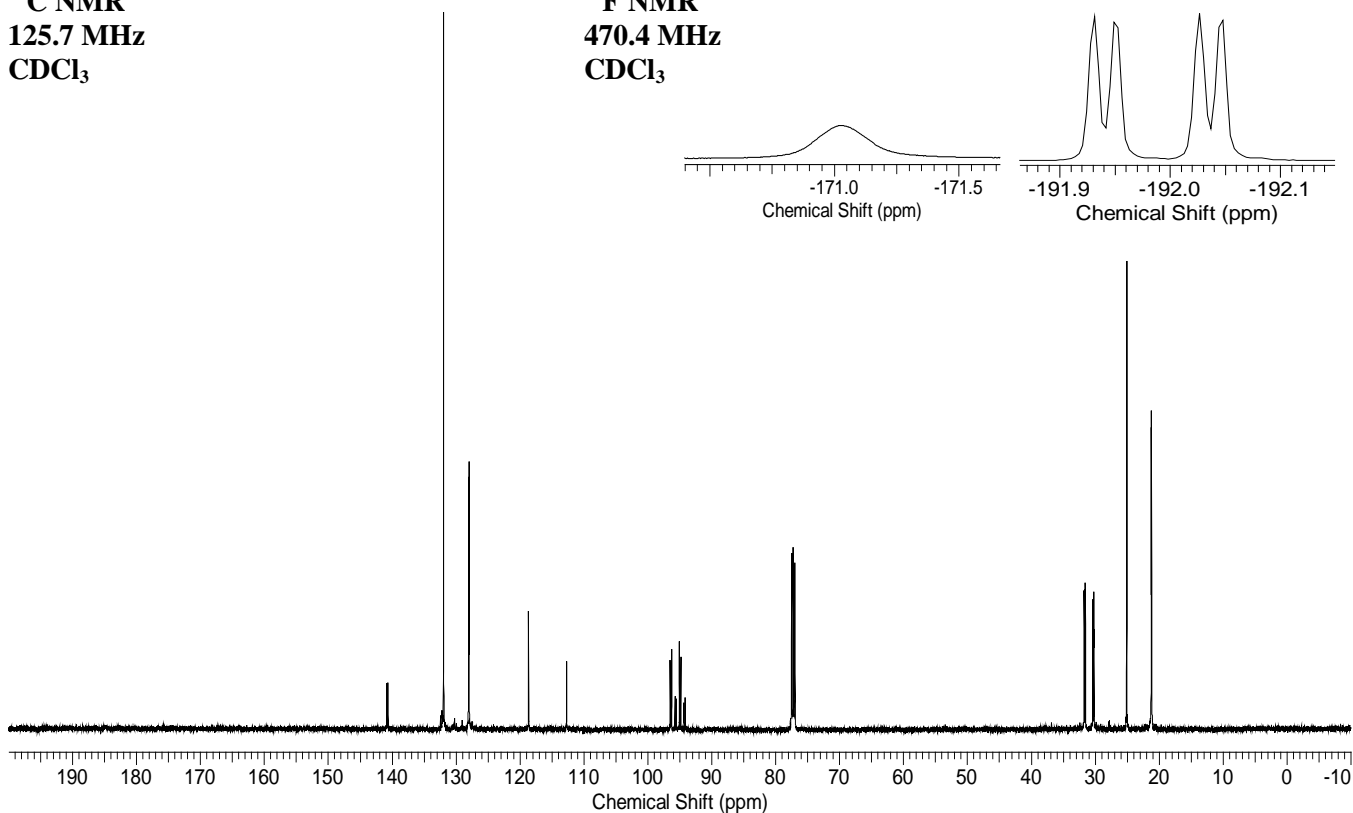

**<sup>1</sup>H NMR**  
**500 MHz**  
**CDCl<sub>3</sub>**

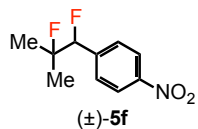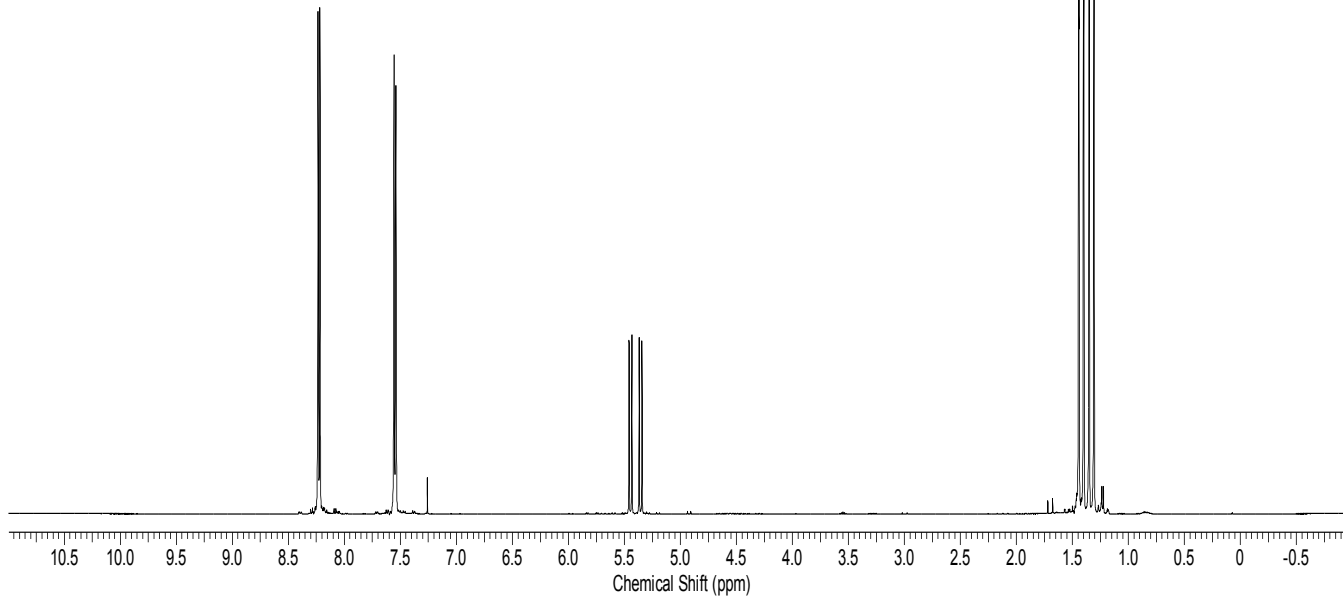

**<sup>13</sup>C NMR**  
**125.7 MHz**  
**CDCl<sub>3</sub>**

**<sup>19</sup>F NMR**  
**470.4 MHz**  
**CDCl<sub>3</sub>**

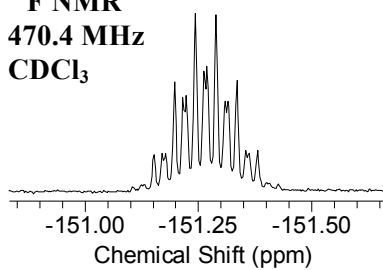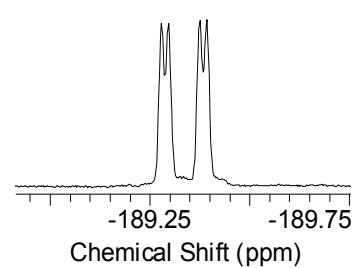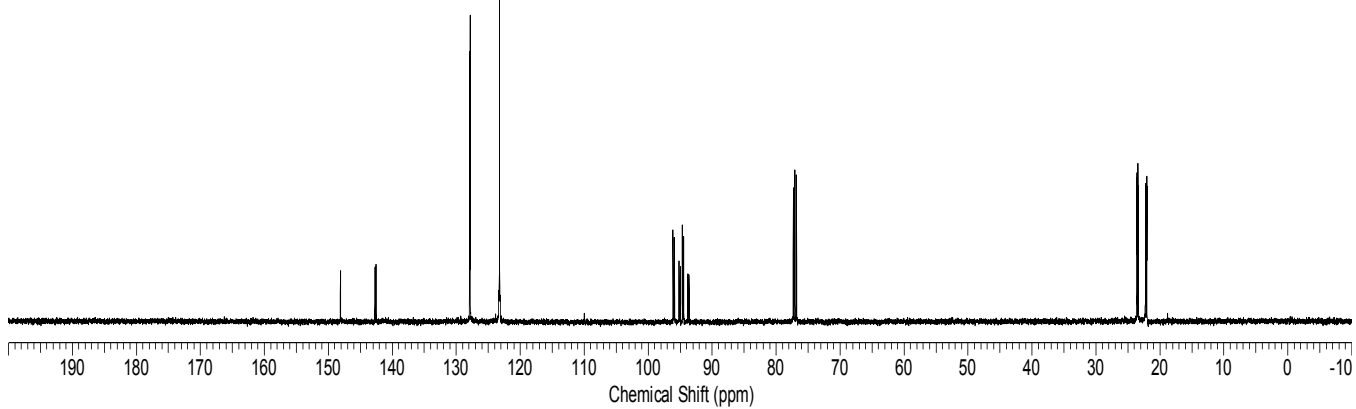

**<sup>1</sup>H NMR**  
500 MHz  
CDCl<sub>3</sub>

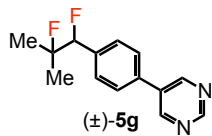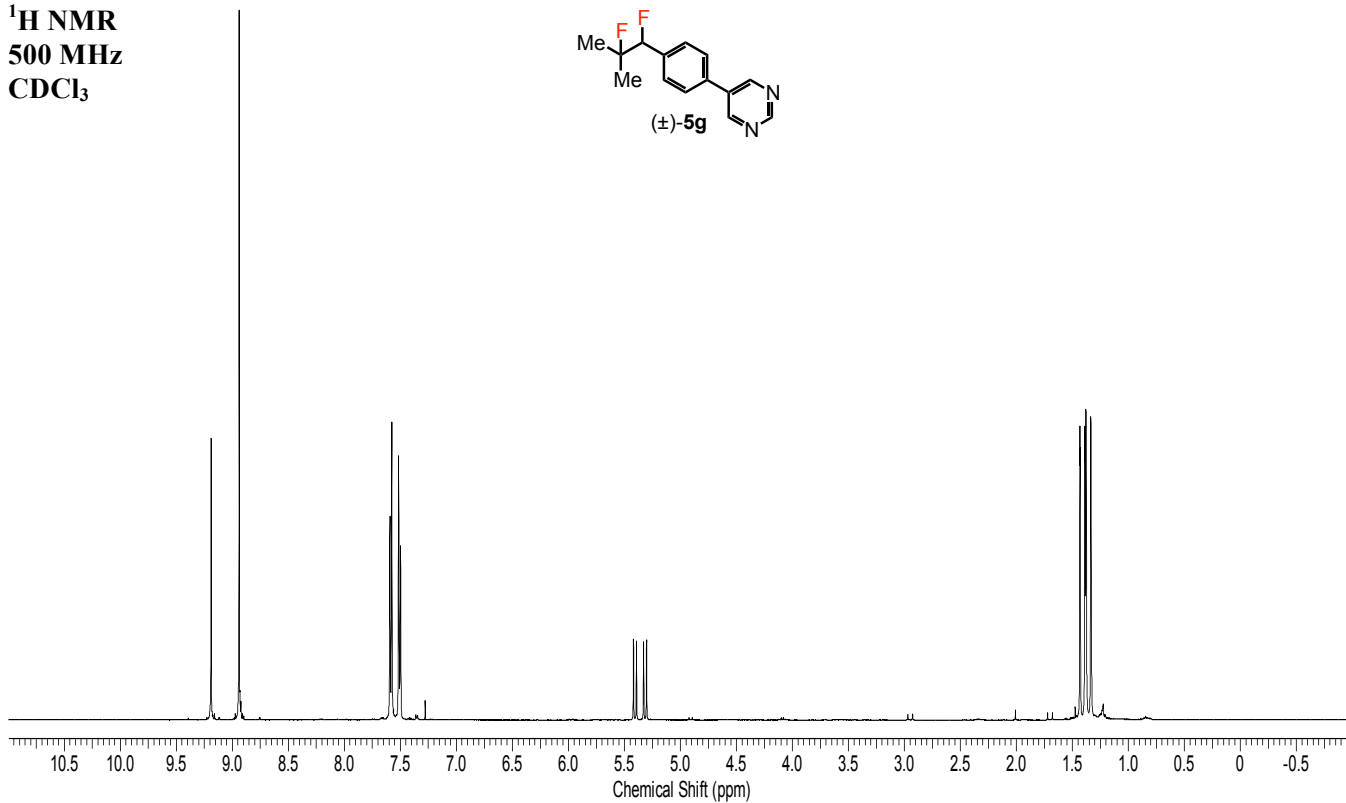

**<sup>13</sup>C NMR**  
125.7 MHz  
CDCl<sub>3</sub>

**<sup>19</sup>F NMR**  
470.4 MHz  
CDCl<sub>3</sub>

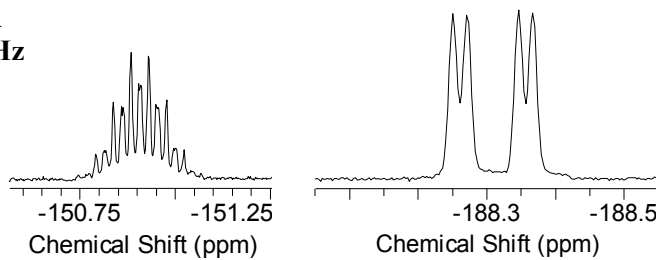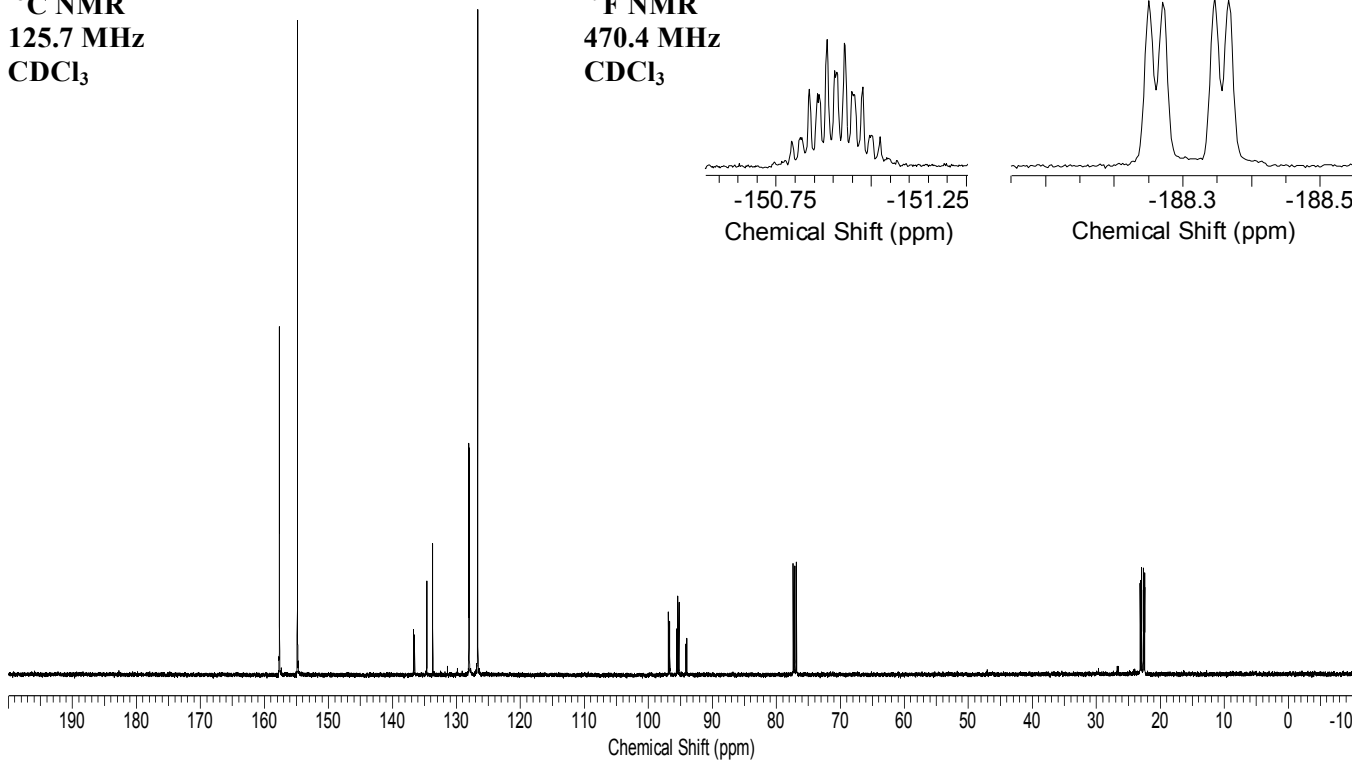



**<sup>1</sup>H NMR**  
**500 MHz**  
**CDCl<sub>3</sub>**

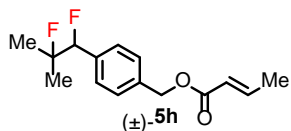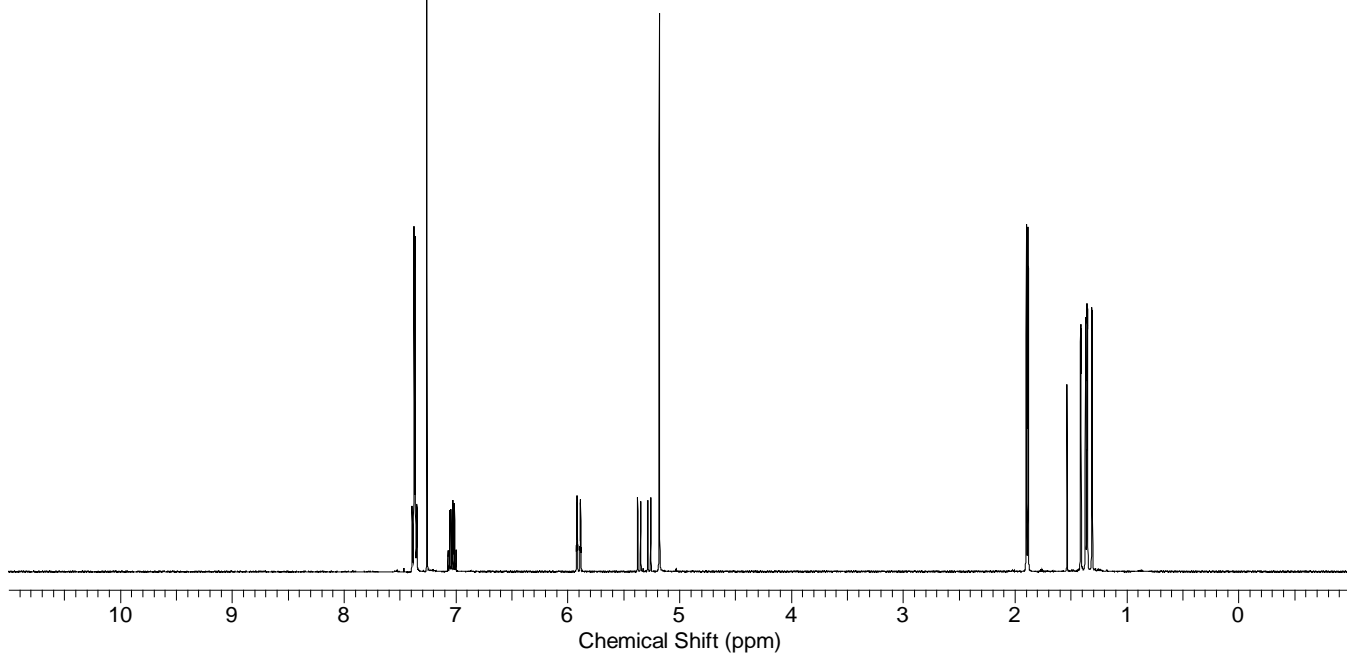

**<sup>13</sup>C NMR**  
**125.7 MHz**  
**CDCl<sub>3</sub>**

**<sup>19</sup>F NMR**  
**470.4 MHz**  
**CDCl<sub>3</sub>**

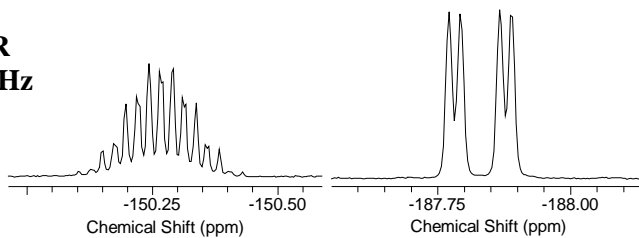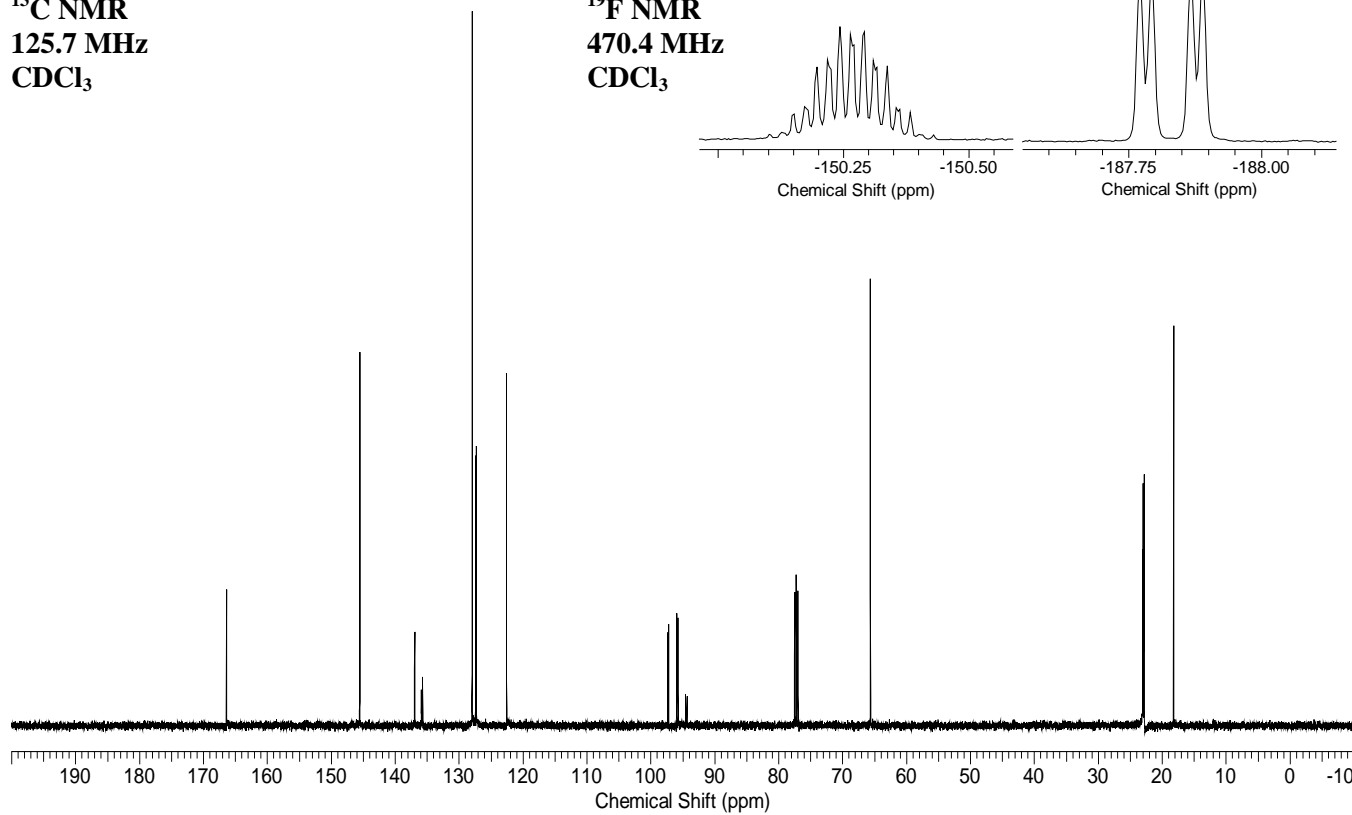

**<sup>1</sup>H NMR**  
**500 MHz**  
**CDCl<sub>3</sub>**

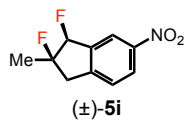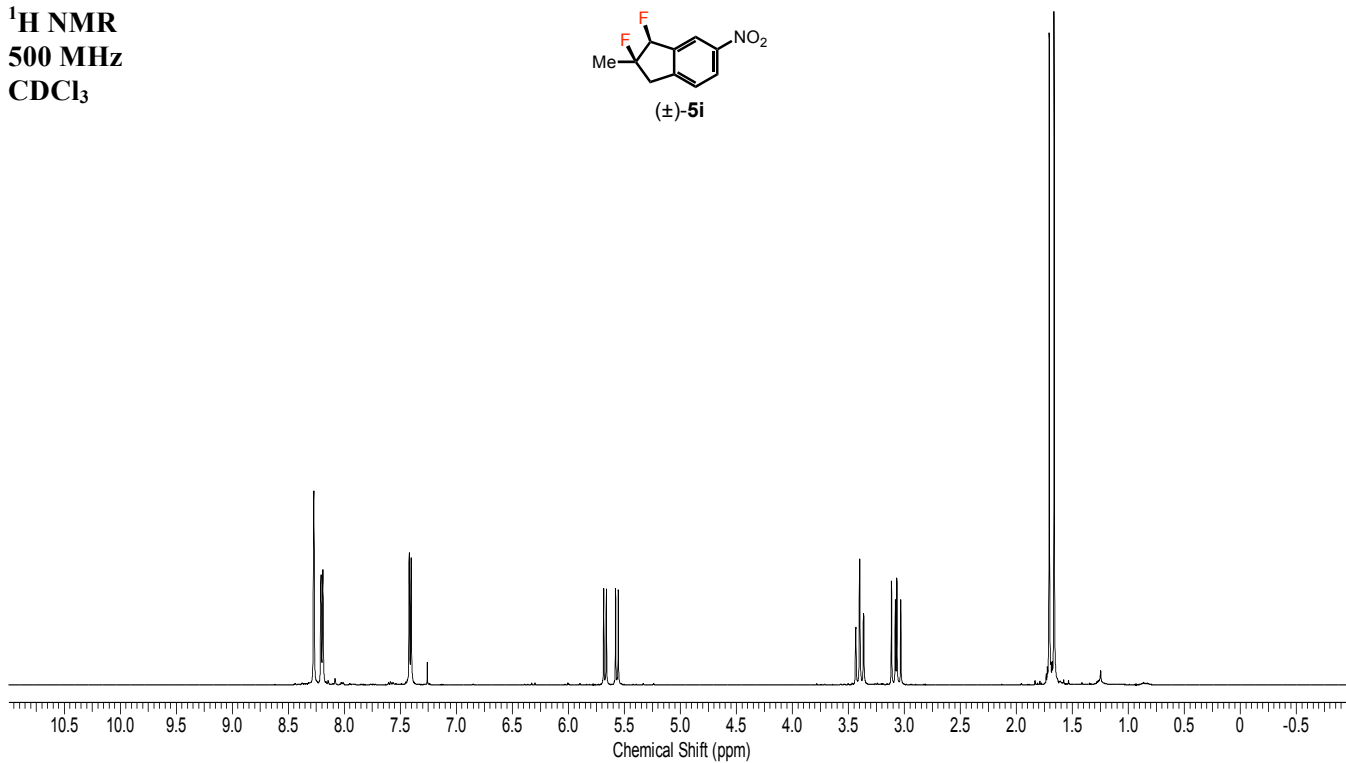

**<sup>13</sup>C NMR**  
**125.7 MHz**  
**CDCl<sub>3</sub>**

**<sup>19</sup>F NMR**  
**470.4 MHz**  
**CDCl<sub>3</sub>**

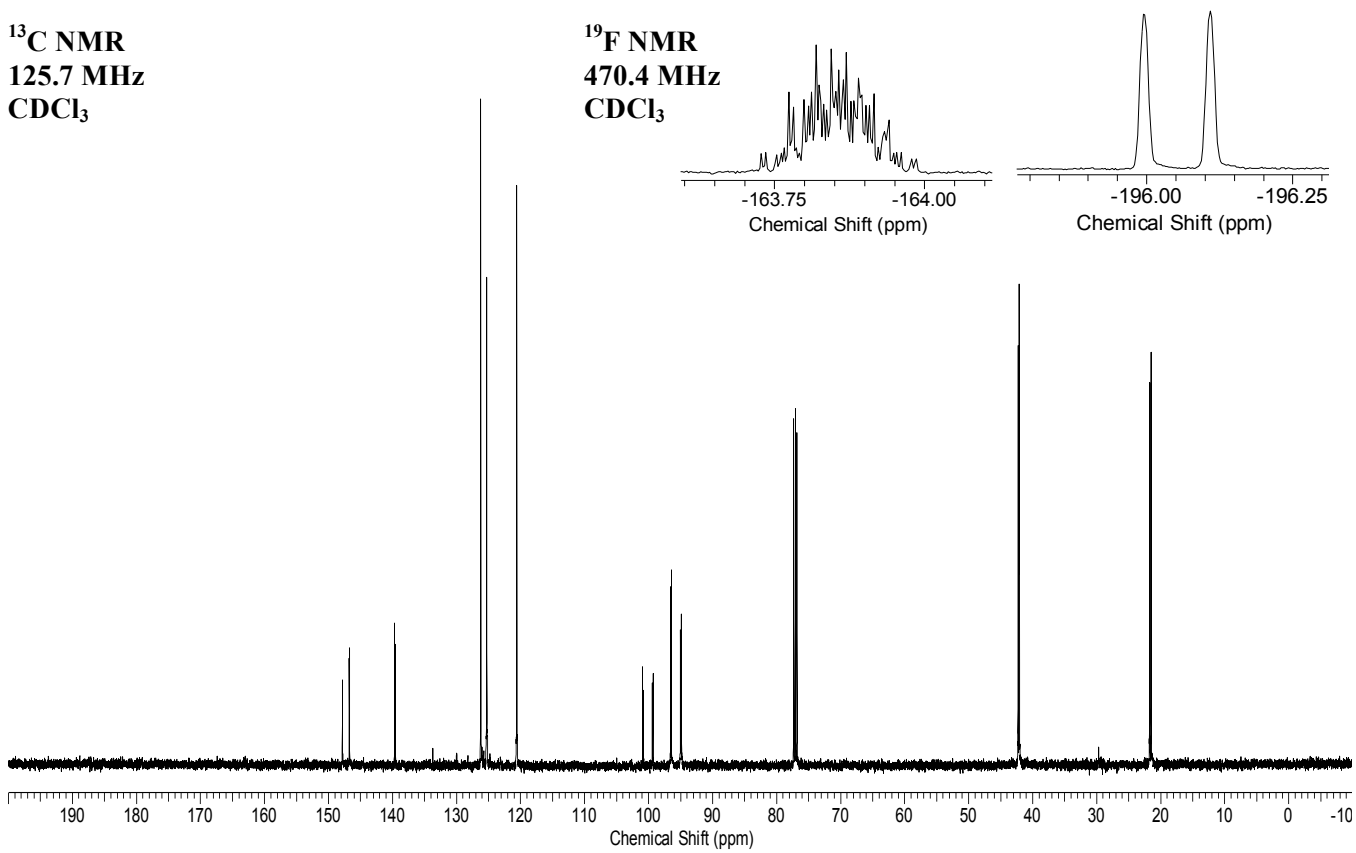

**<sup>1</sup>H NMR**  
**500 MHz**  
**CDCl<sub>3</sub>**

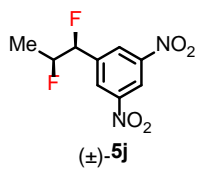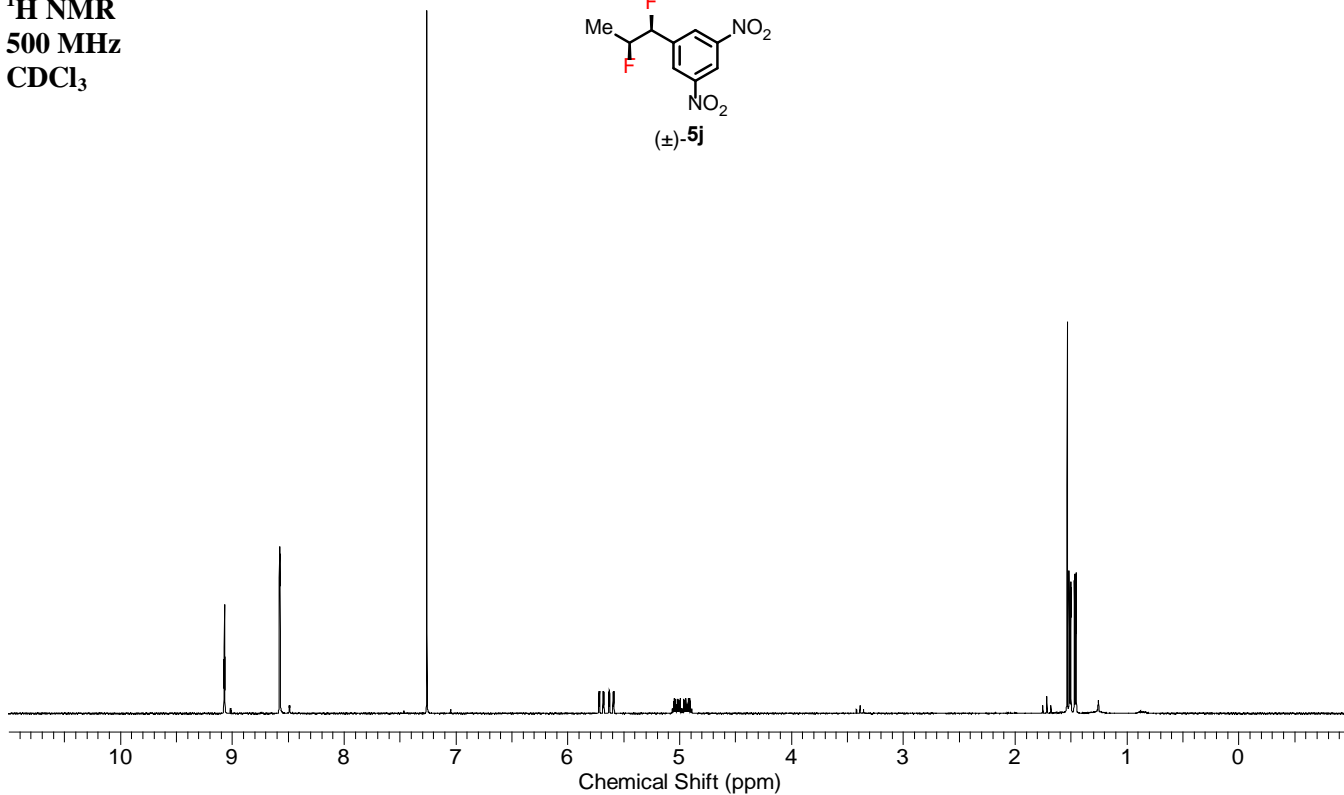

**<sup>13</sup>C NMR**  
**125.7 MHz**  
**CDCl<sub>3</sub>**

**<sup>19</sup>F NMR**  
**470.4 MHz**  
**CDCl<sub>3</sub>**

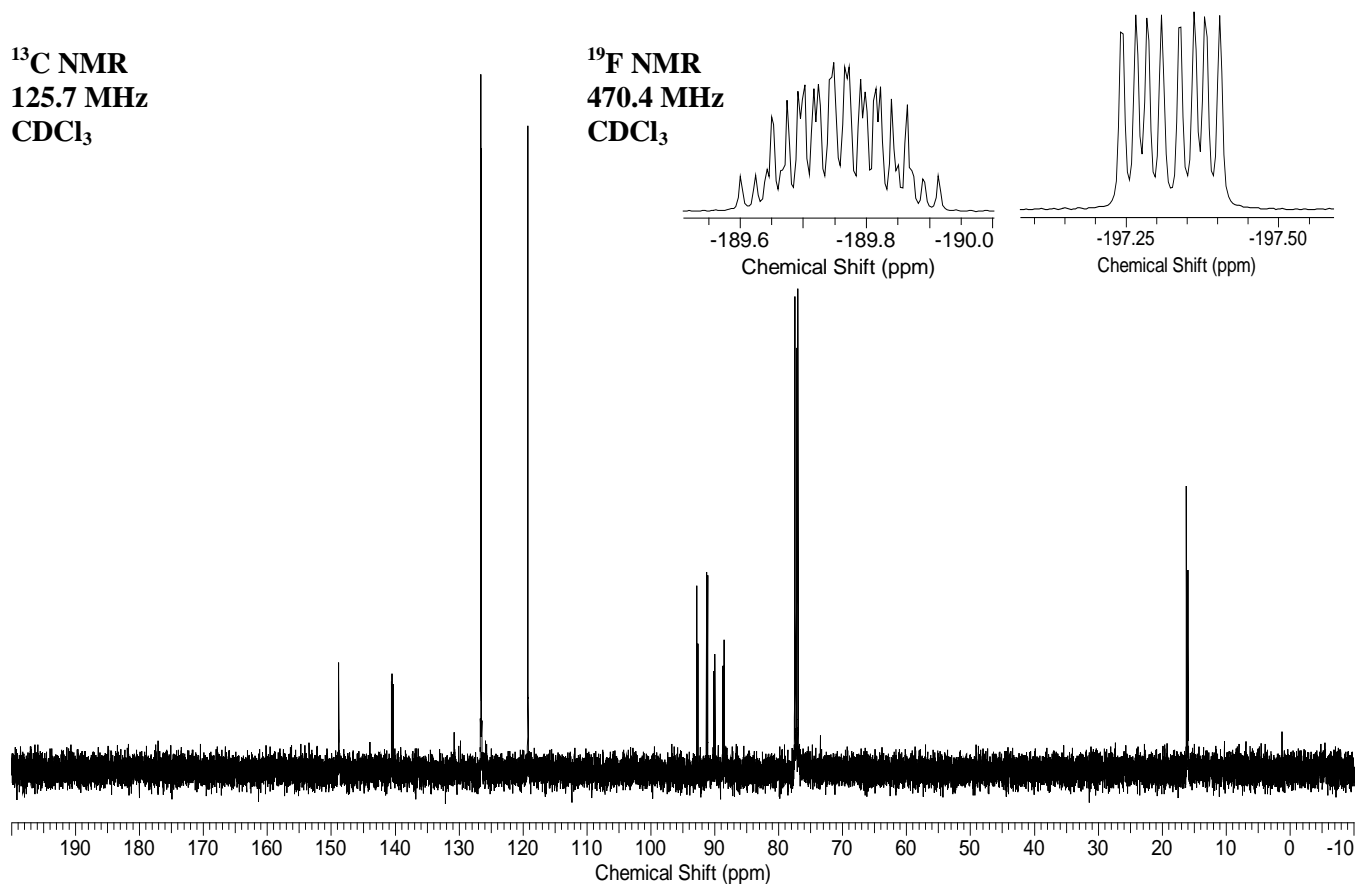

**<sup>1</sup>H NMR**  
500 MHz  
CDCl<sub>3</sub>

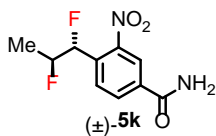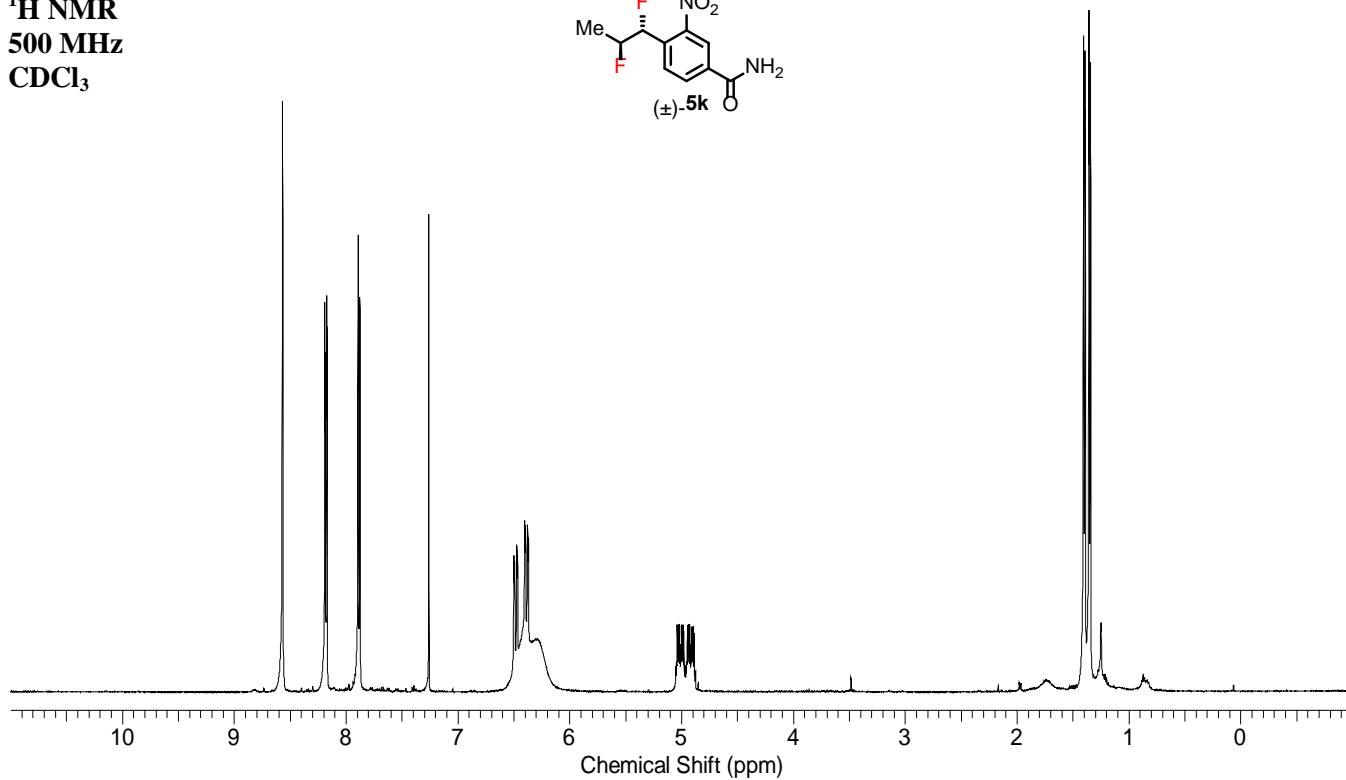

**<sup>13</sup>C NMR**  
125.7 MHz  
CDCl<sub>3</sub>

**<sup>19</sup>F NMR**  
470.4 MHz  
CDCl<sub>3</sub>

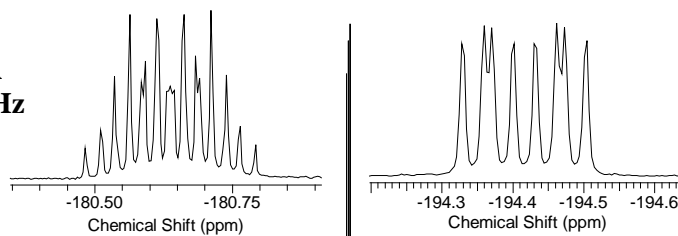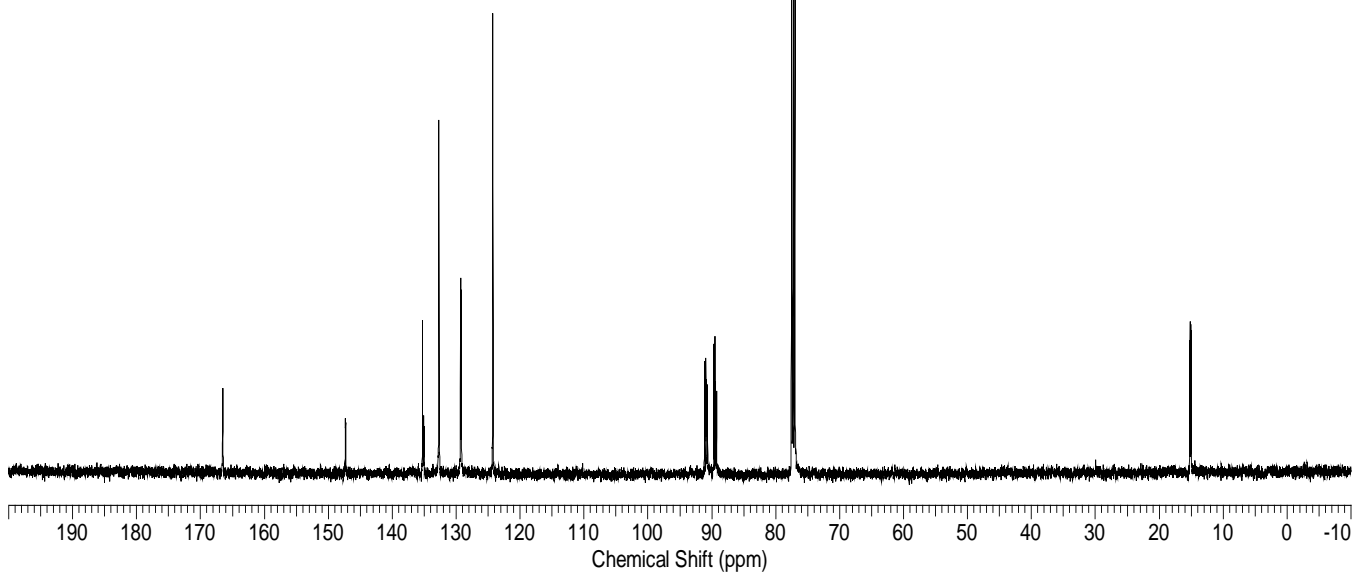

**<sup>1</sup>H NMR**  
**500 MHz**  
**CDCl<sub>3</sub>**

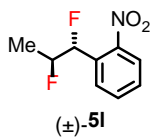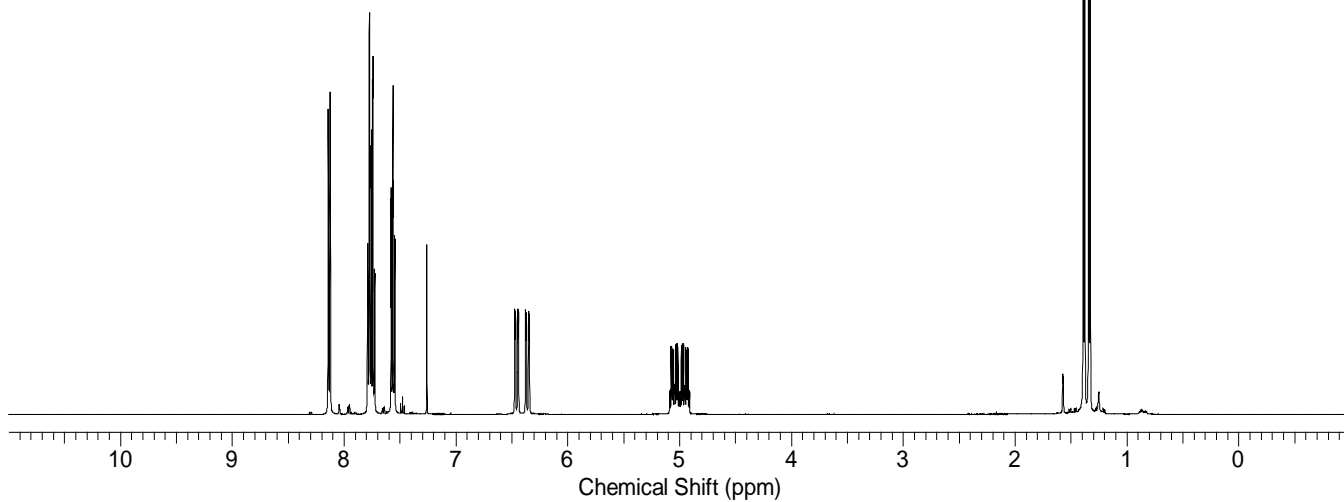

**<sup>13</sup>C NMR**  
**125.7 MHz**  
**CDCl<sub>3</sub>**

**<sup>19</sup>F NMR**  
**470.4 MHz**  
**CDCl<sub>3</sub>**

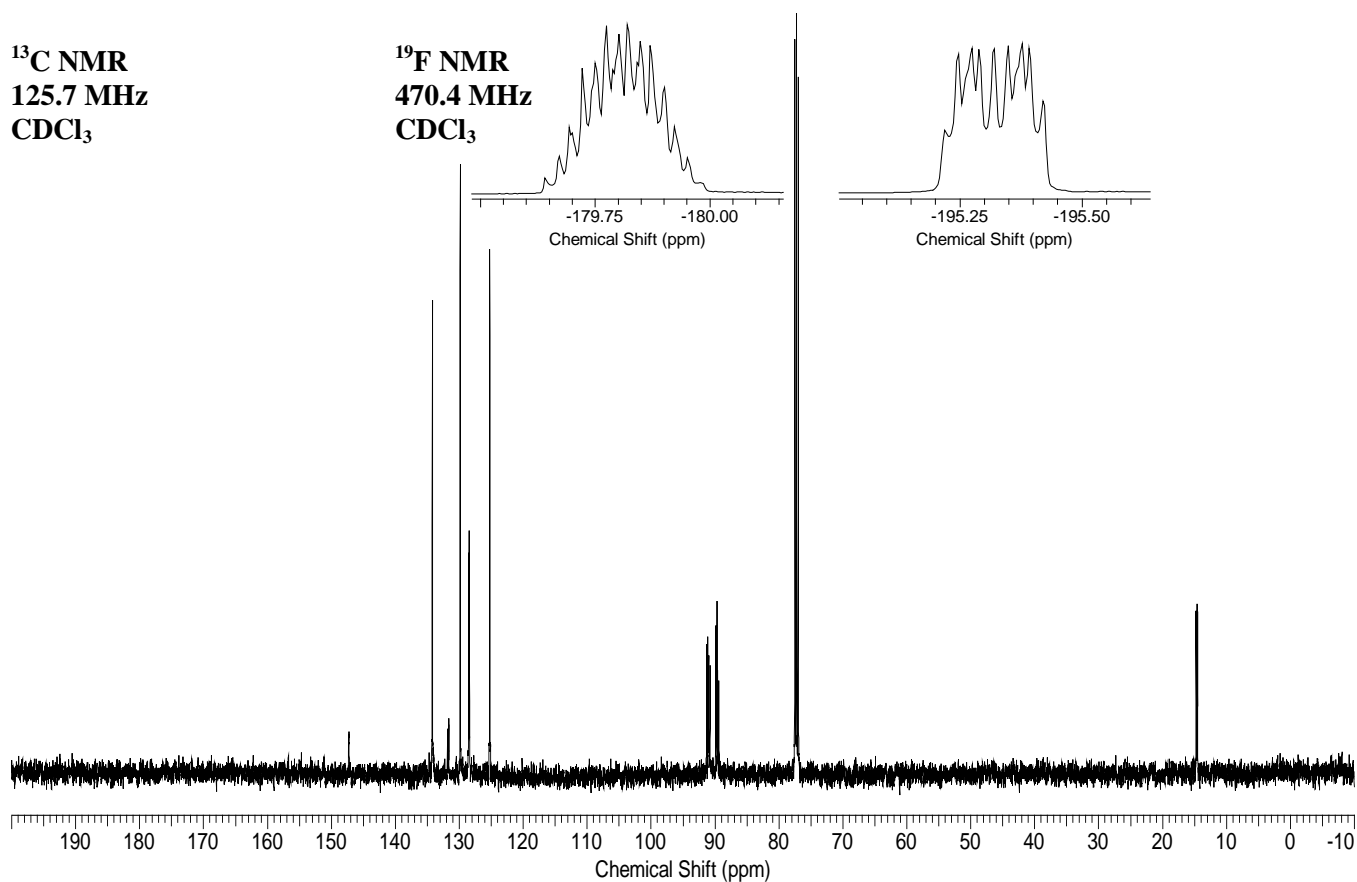

**<sup>1</sup>H NMR**  
**500 MHz**  
**CDCl<sub>3</sub>**

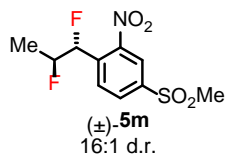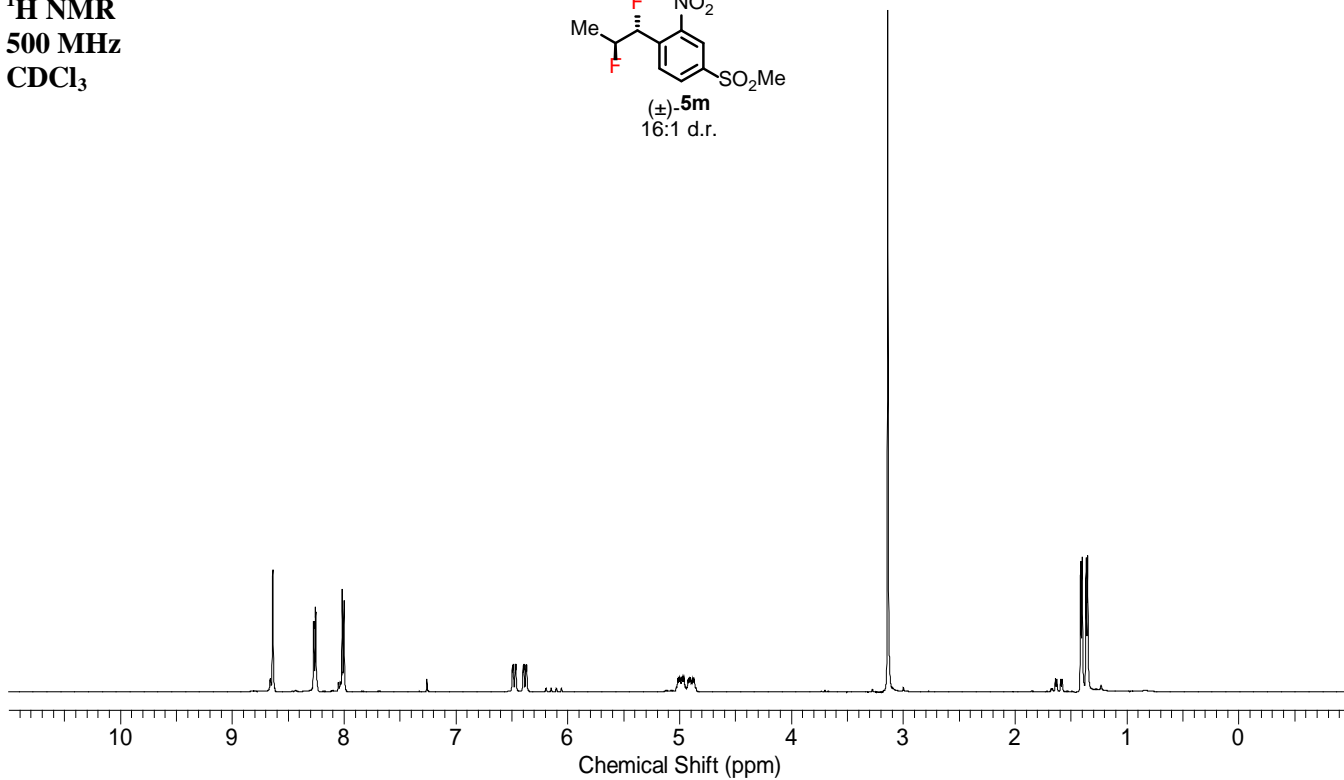

**<sup>13</sup>C NMR**  
**125.7 MHz**  
**CDCl<sub>3</sub>**

**<sup>19</sup>F NMR**  
**470.4 MHz**  
**CDCl<sub>3</sub>**

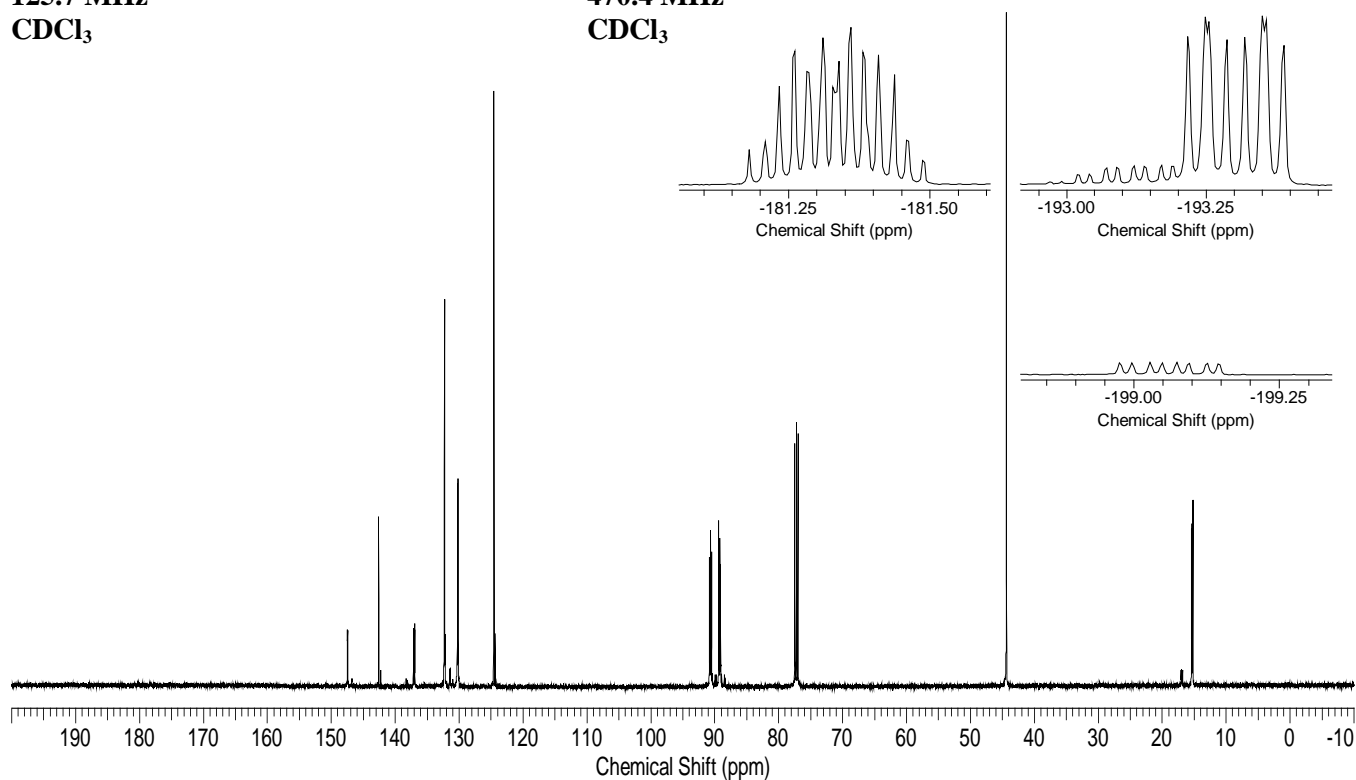

**<sup>1</sup>H NMR**  
**500 MHz**  
**CDCl<sub>3</sub>**

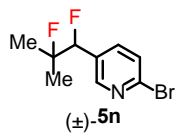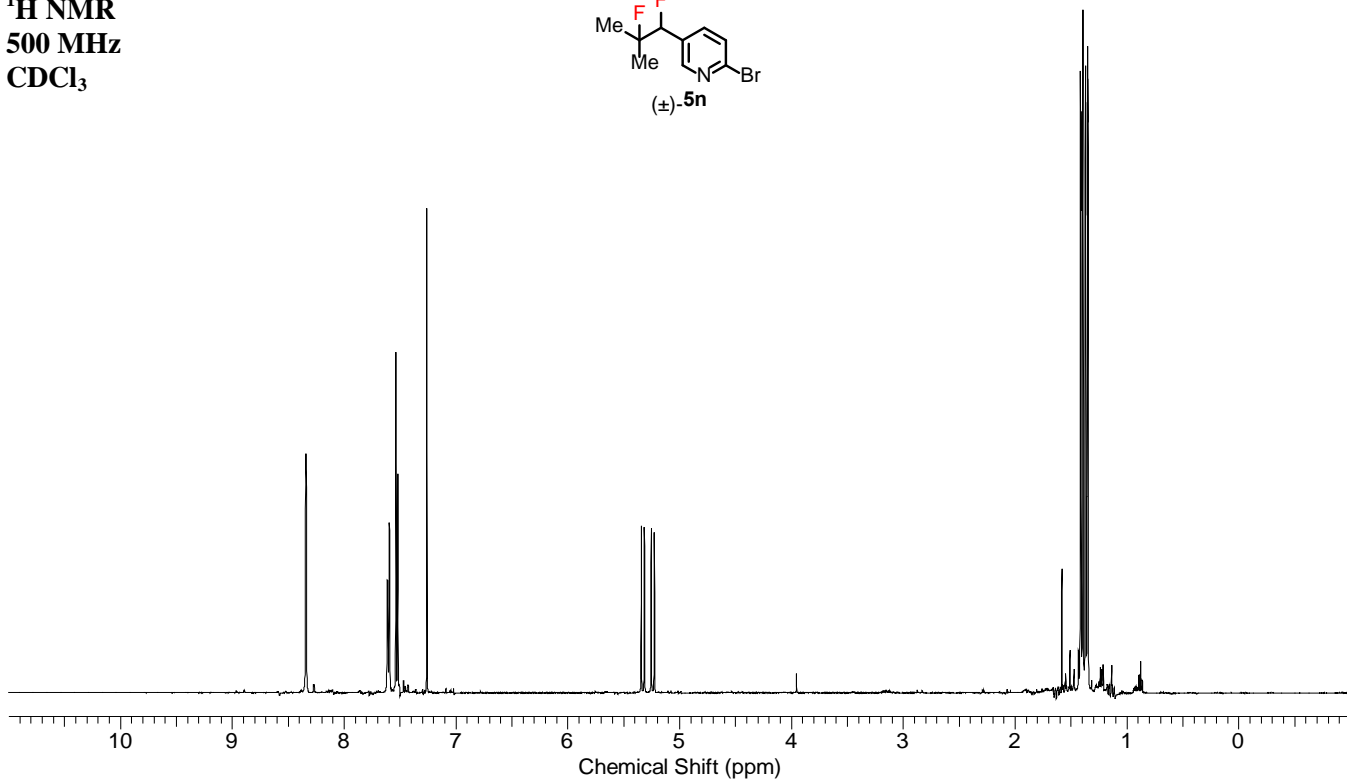

**<sup>13</sup>C NMR**  
**125.7 MHz**  
**CDCl<sub>3</sub>**

**<sup>19</sup>F NMR**  
**470.4 MHz**  
**CDCl<sub>3</sub>**

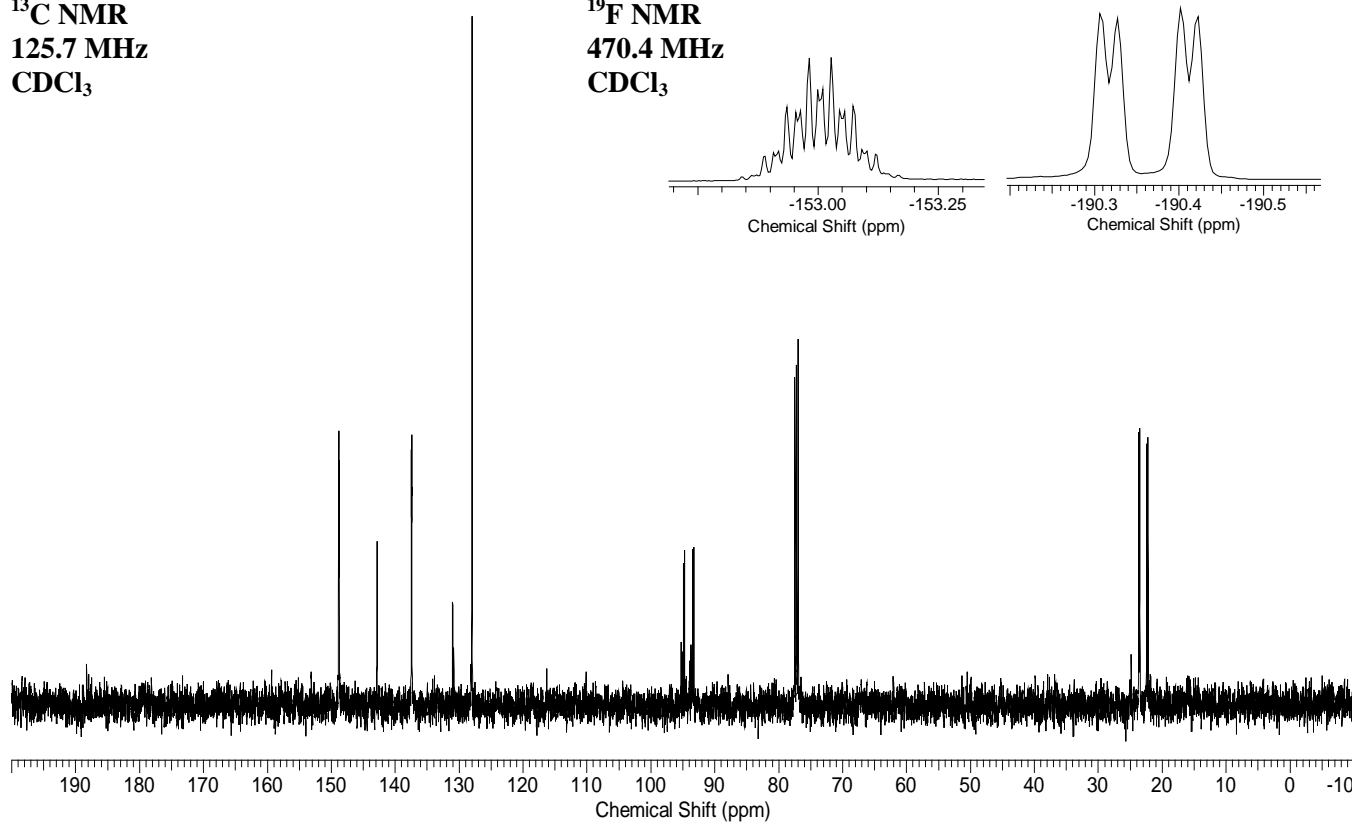

**<sup>1</sup>H NMR**  
**500 MHz**  
**CDCl<sub>3</sub>**

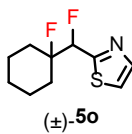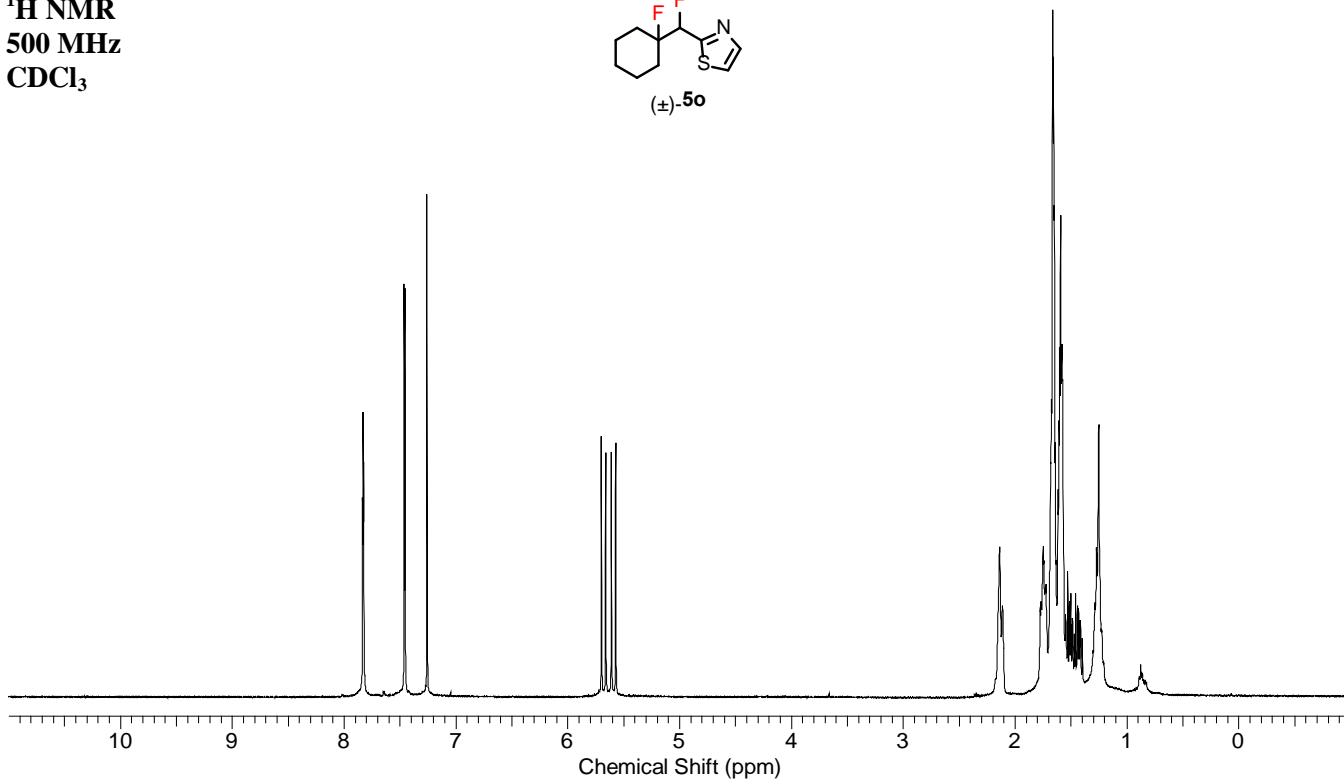

**<sup>13</sup>C NMR**  
**125.7 MHz**  
**CDCl<sub>3</sub>**

**<sup>19</sup>F NMR**  
**470.4 MHz**  
**CDCl<sub>3</sub>**

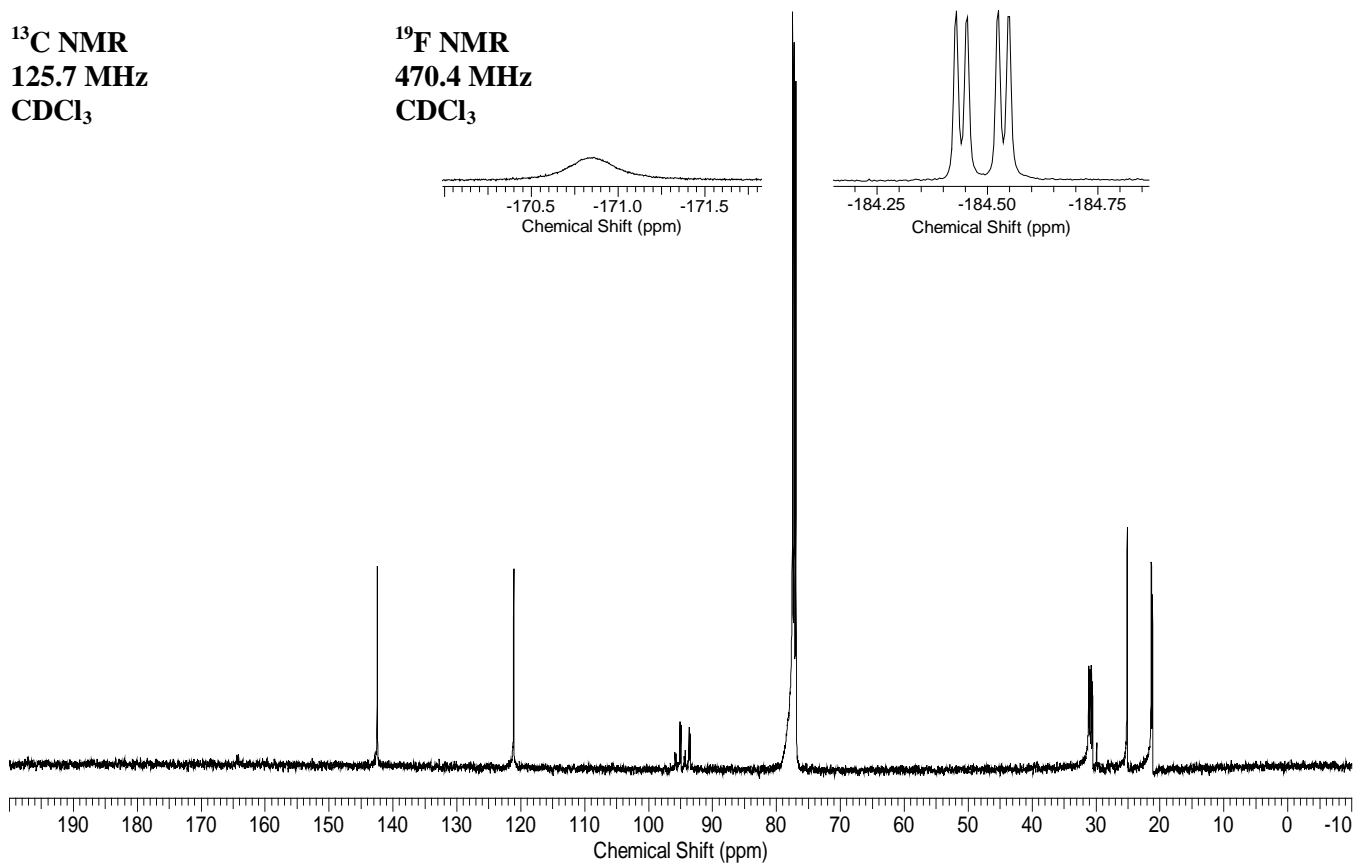



**<sup>1</sup>H NMR**  
**500 MHz**  
**CDCl<sub>3</sub>**

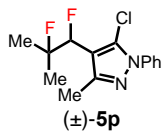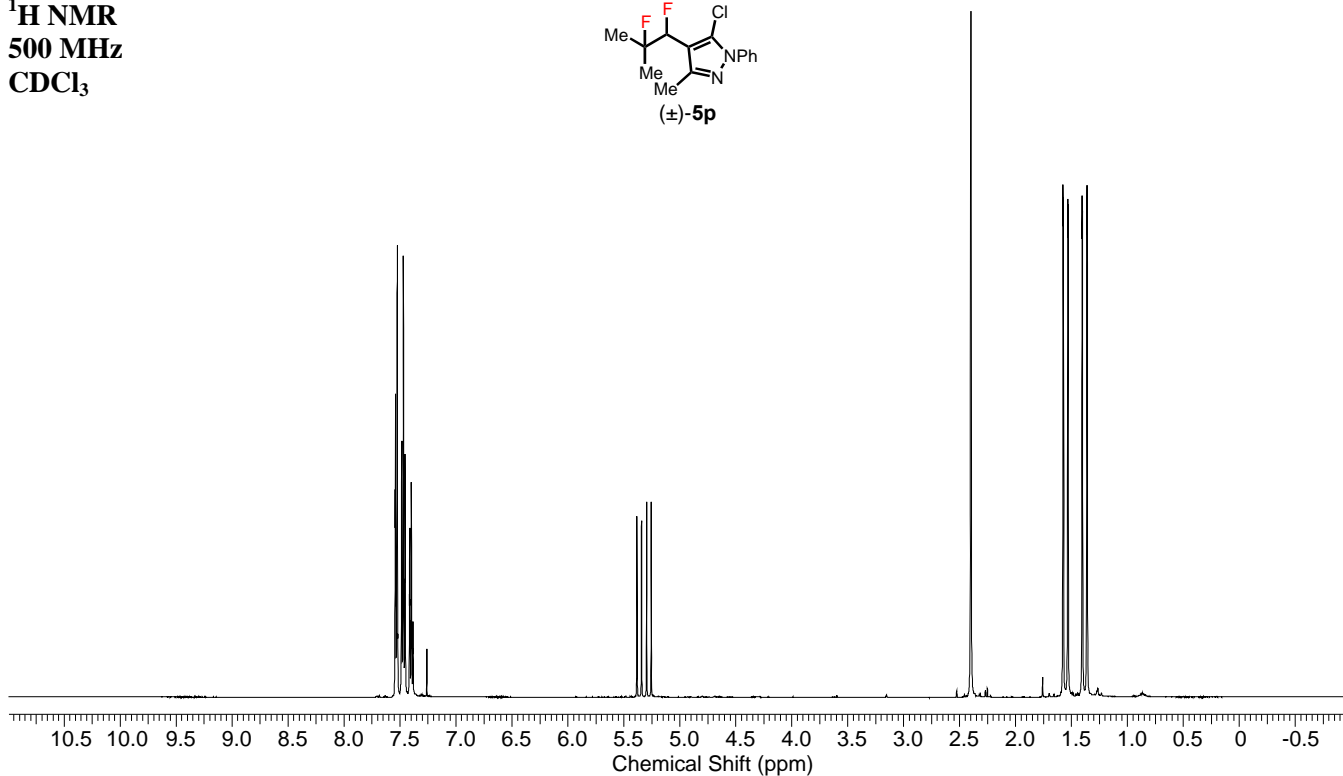

**<sup>13</sup>C NMR**  
**125.7 MHz**  
**CDCl<sub>3</sub>**

**<sup>19</sup>F NMR**  
**470.4 MHz**  
**CDCl<sub>3</sub>**

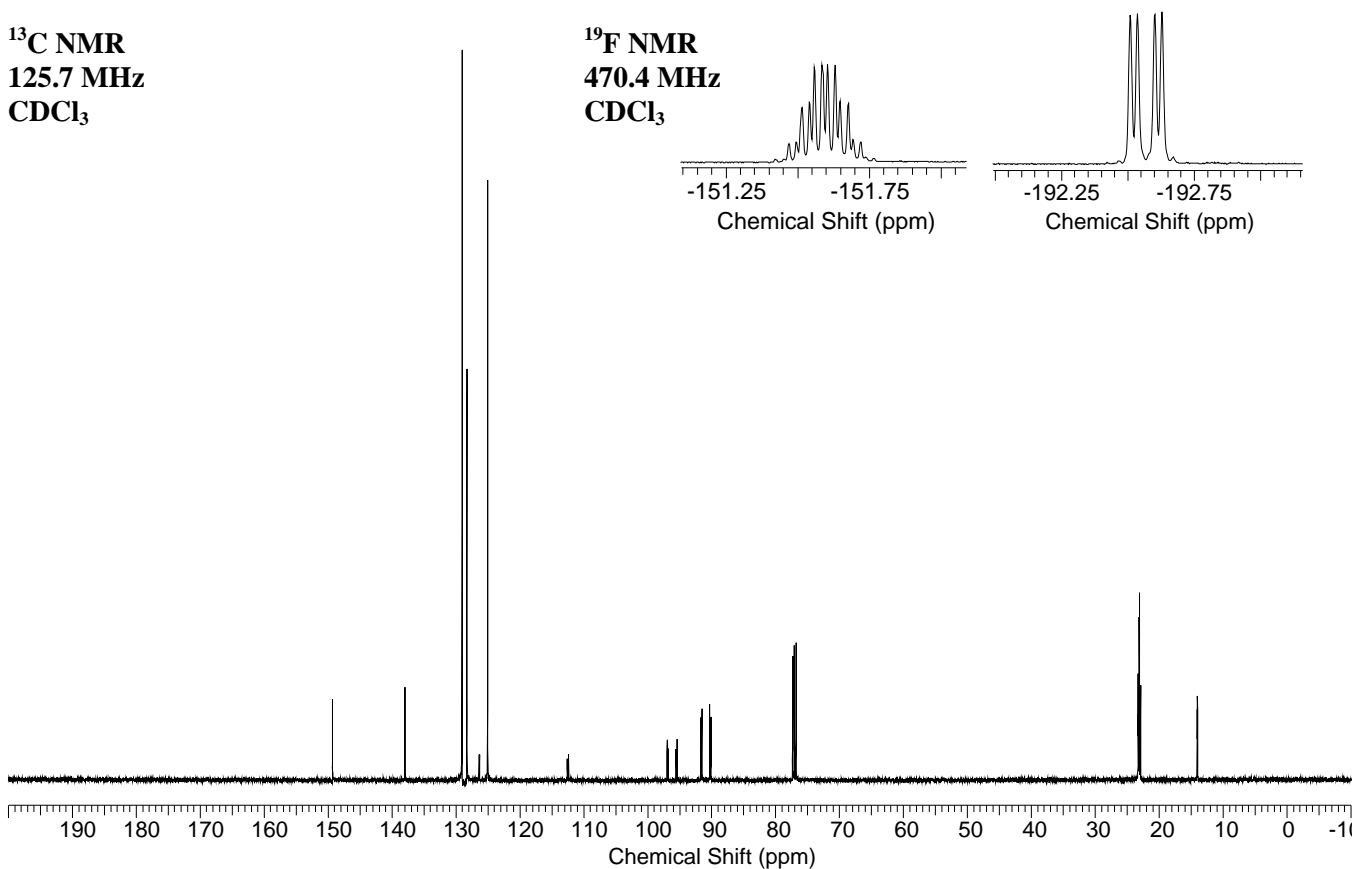

**<sup>1</sup>H NMR**  
**500 MHz**  
**CDCl<sub>3</sub>**

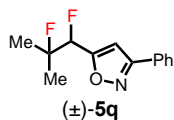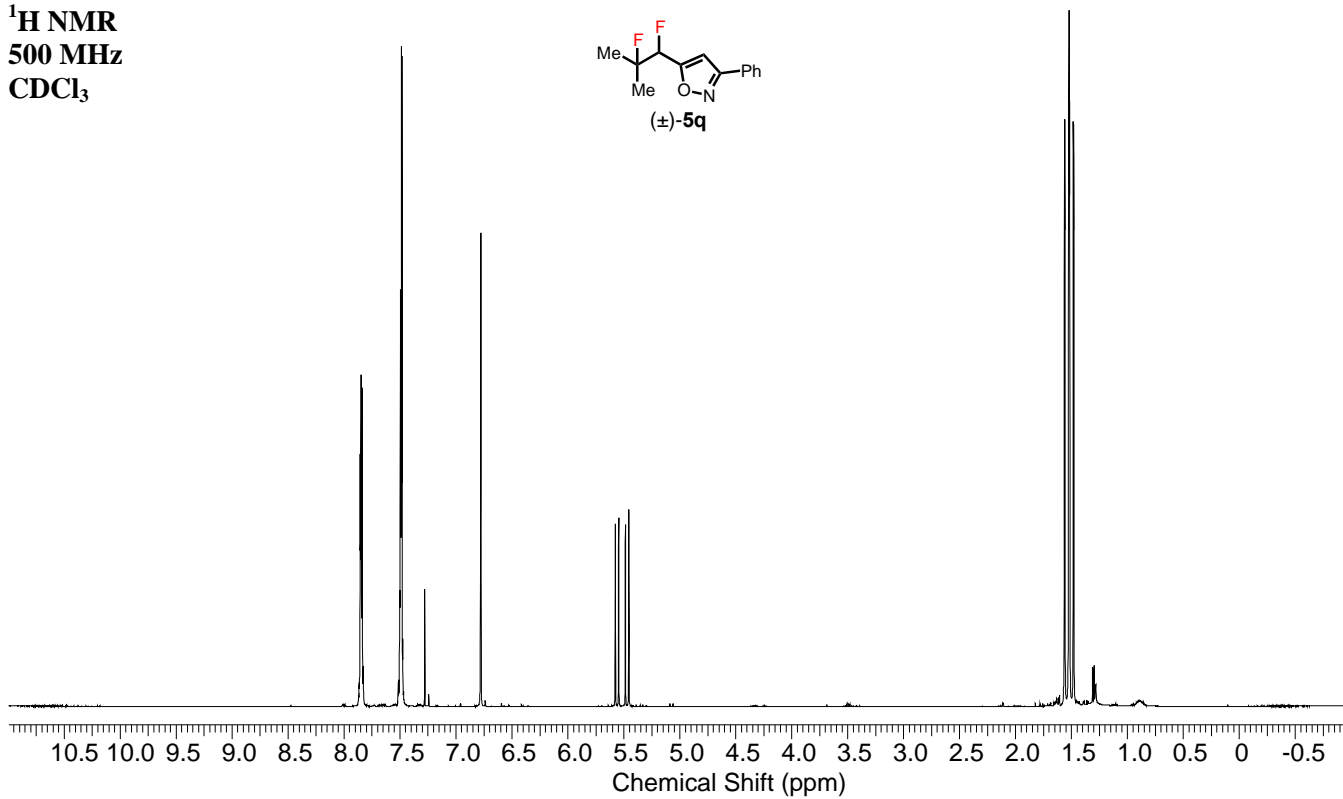

**<sup>13</sup>C NMR**  
**125.7 MHz**  
**CDCl<sub>3</sub>**

**<sup>19</sup>F NMR**  
**470.4 MHz**  
**CDCl<sub>3</sub>**

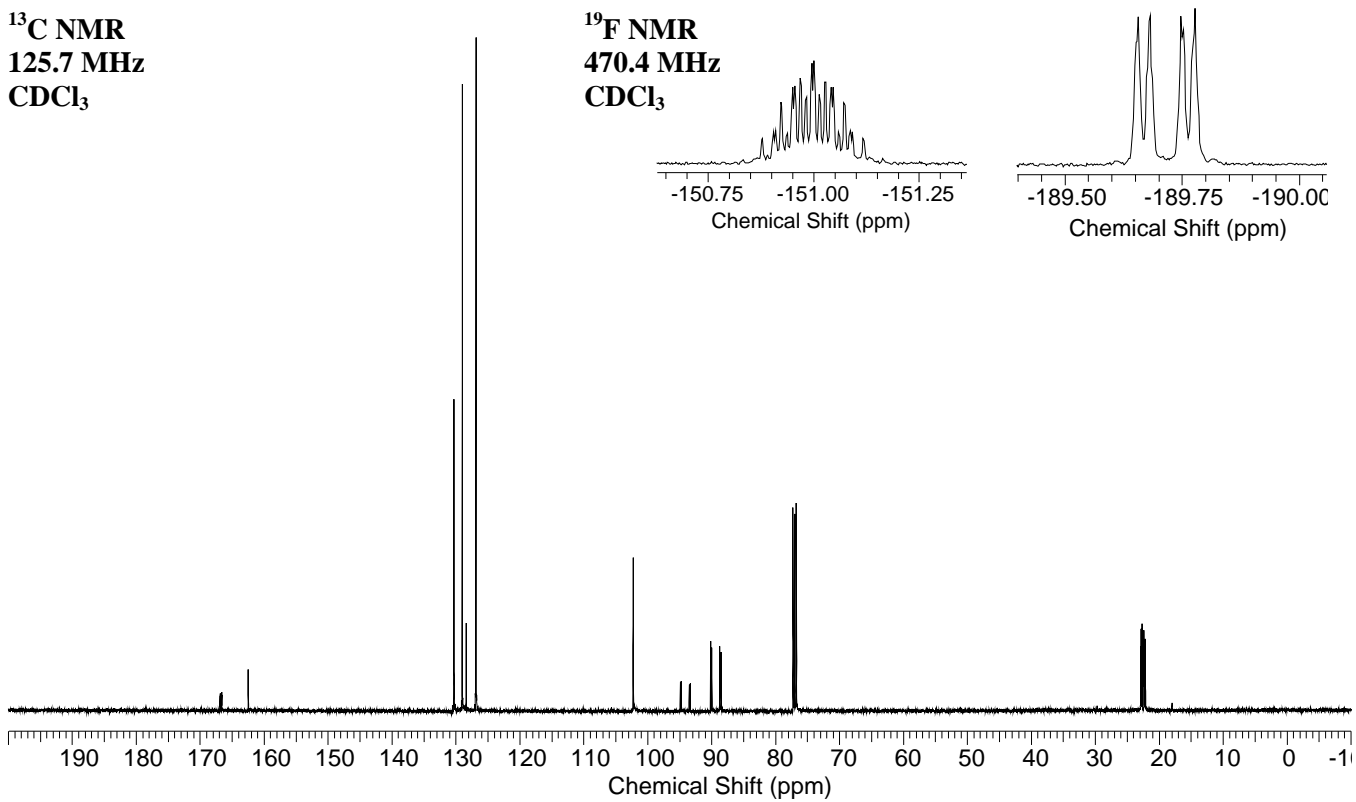

**<sup>1</sup>H NMR**  
**500 MHz**  
**CDCl<sub>3</sub>**

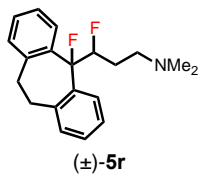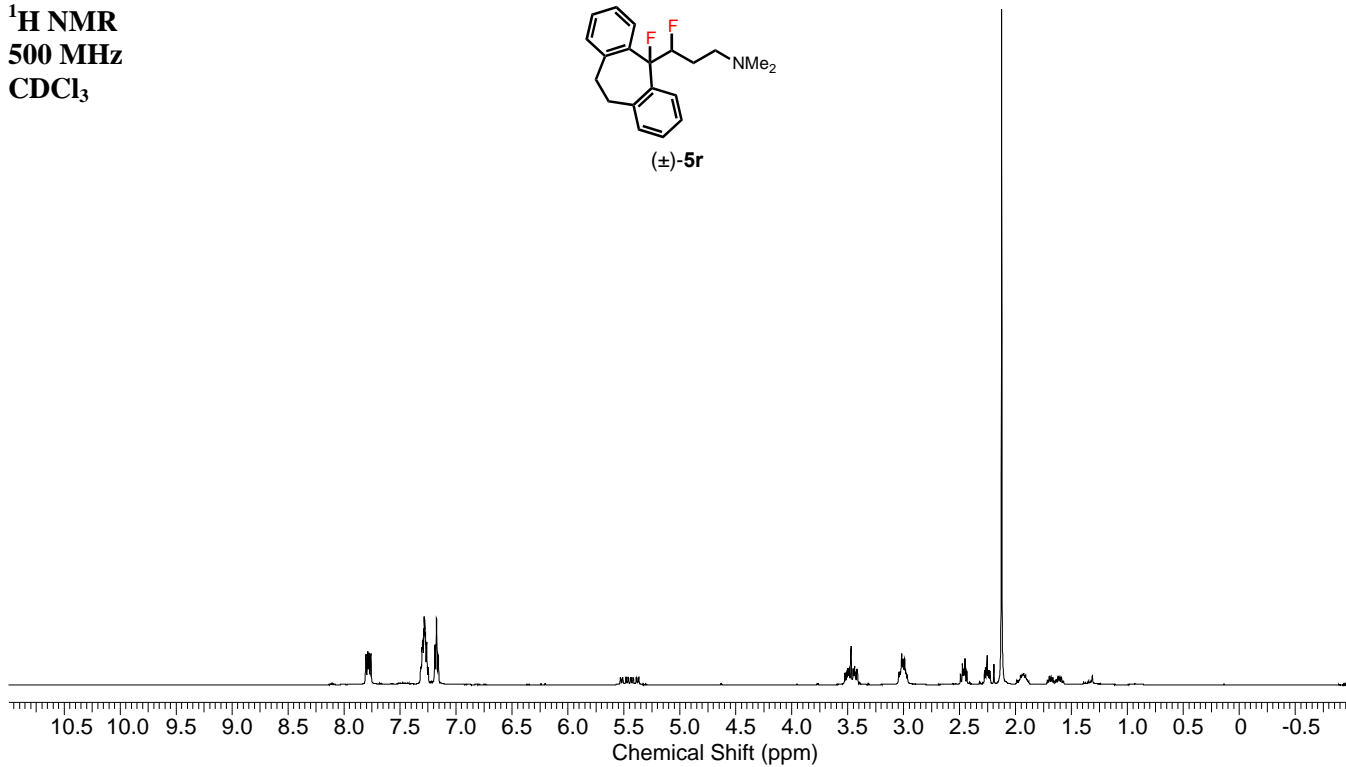

**<sup>13</sup>C NMR**  
**125.7 MHz**  
**CDCl<sub>3</sub>**

**<sup>19</sup>F NMR**  
**470.4 MHz**  
**CDCl<sub>3</sub>**

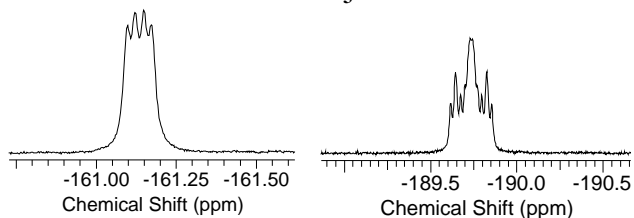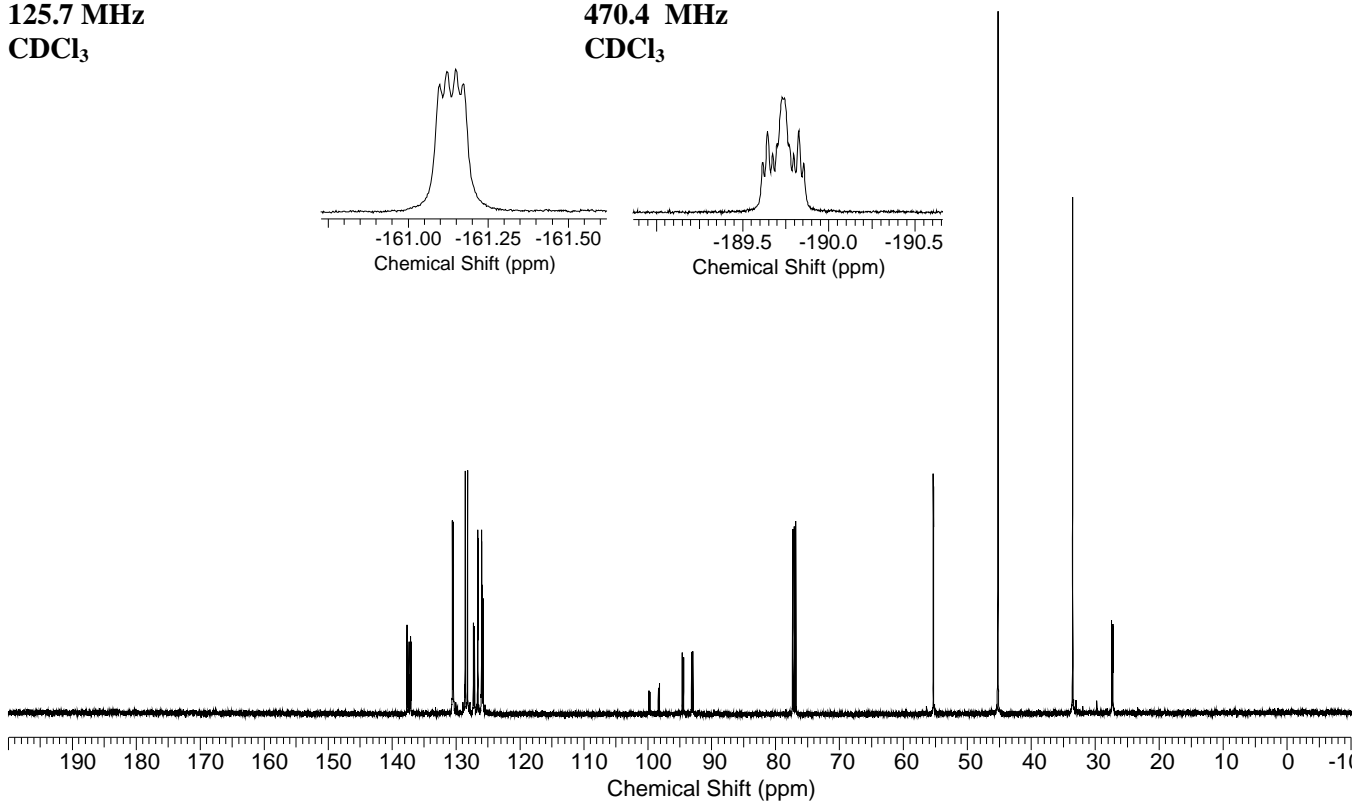

**<sup>1</sup>H NMR**  
**500 MHz**  
**CDCl<sub>3</sub>**

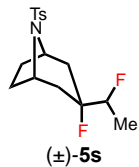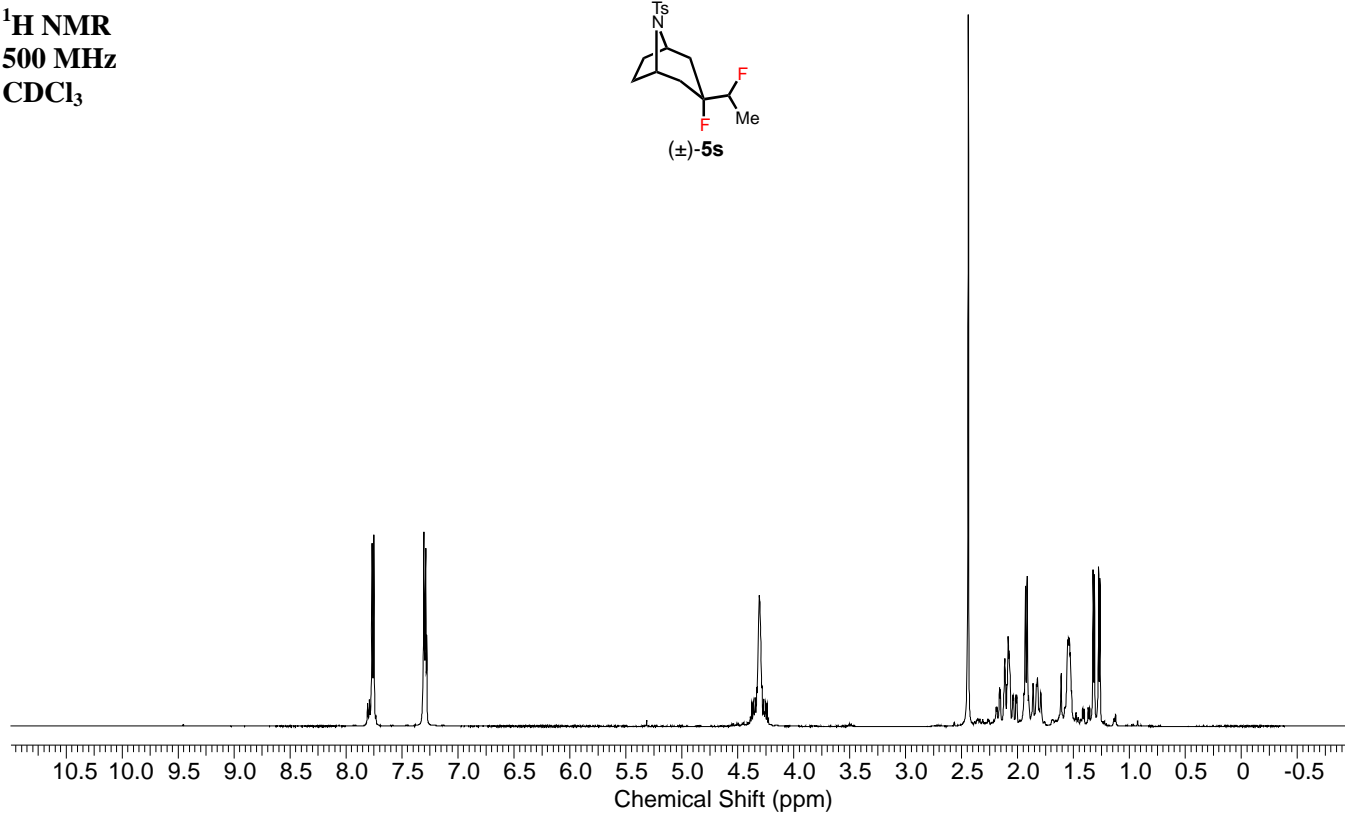

**<sup>13</sup>C NMR**  
**125.7 MHz**  
**CDCl<sub>3</sub>**

**<sup>19</sup>F NMR**  
**470.4 MHz**  
**CDCl<sub>3</sub>**

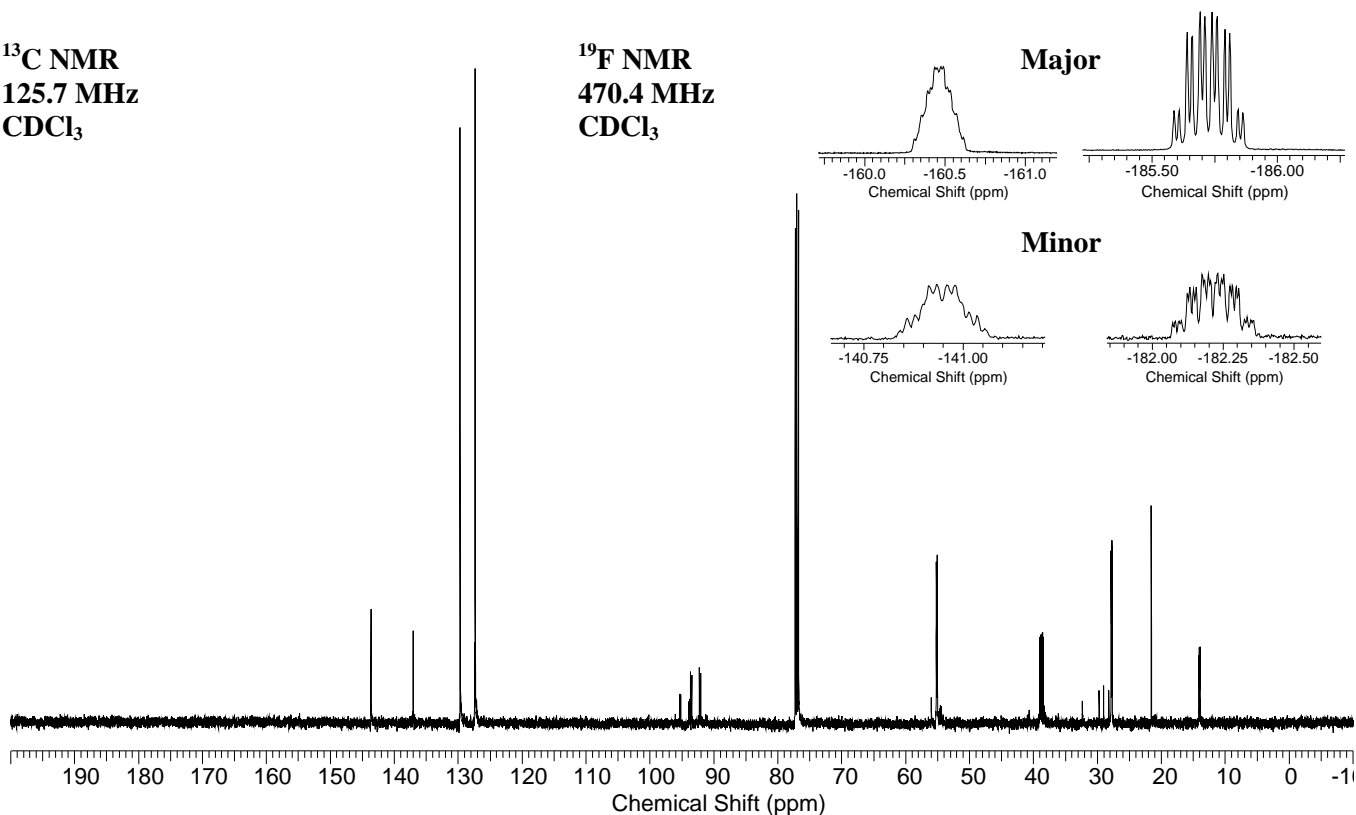

**<sup>1</sup>H NMR**  
500 MHz  
CDCl<sub>3</sub>

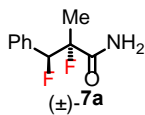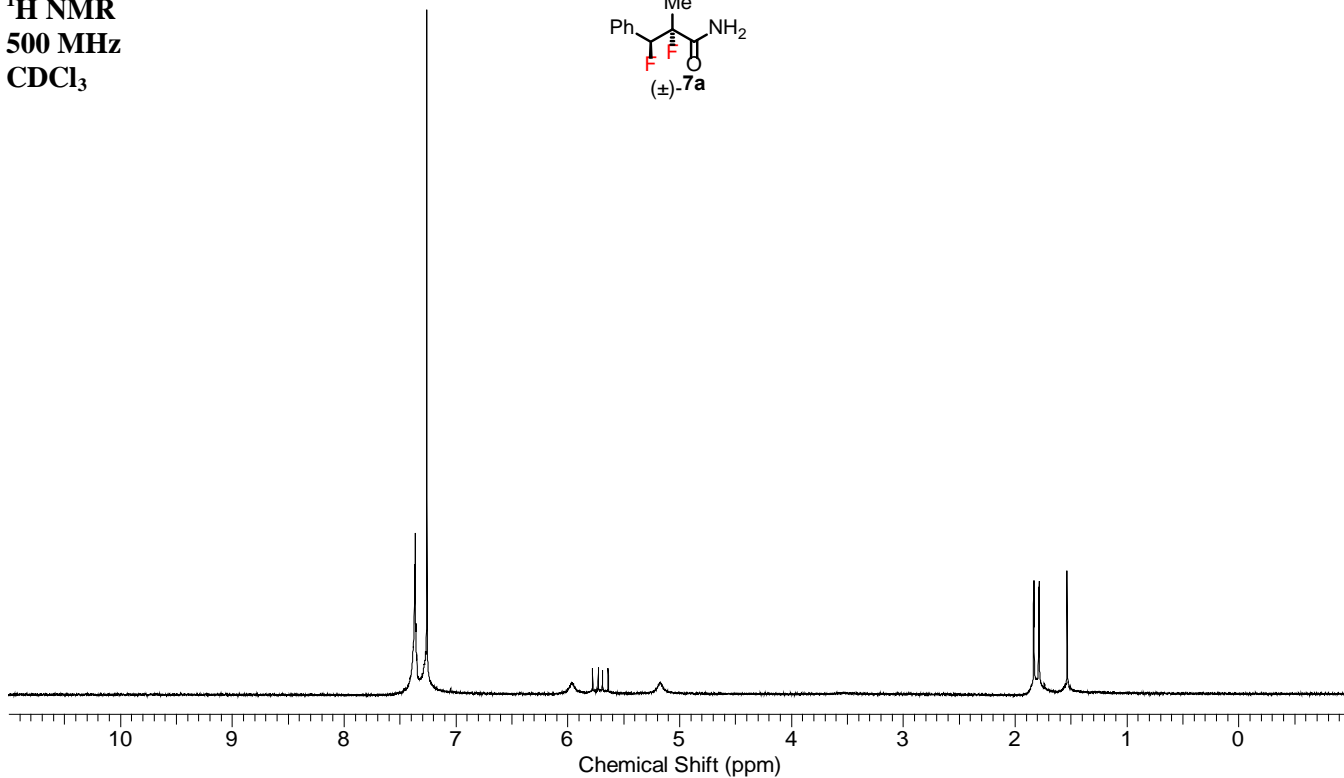

**<sup>13</sup>C NMR**  
125.7 MHz  
DMSO-*d*<sub>6</sub>

**<sup>19</sup>F NMR**  
470.4 MHz  
CDCl<sub>3</sub>

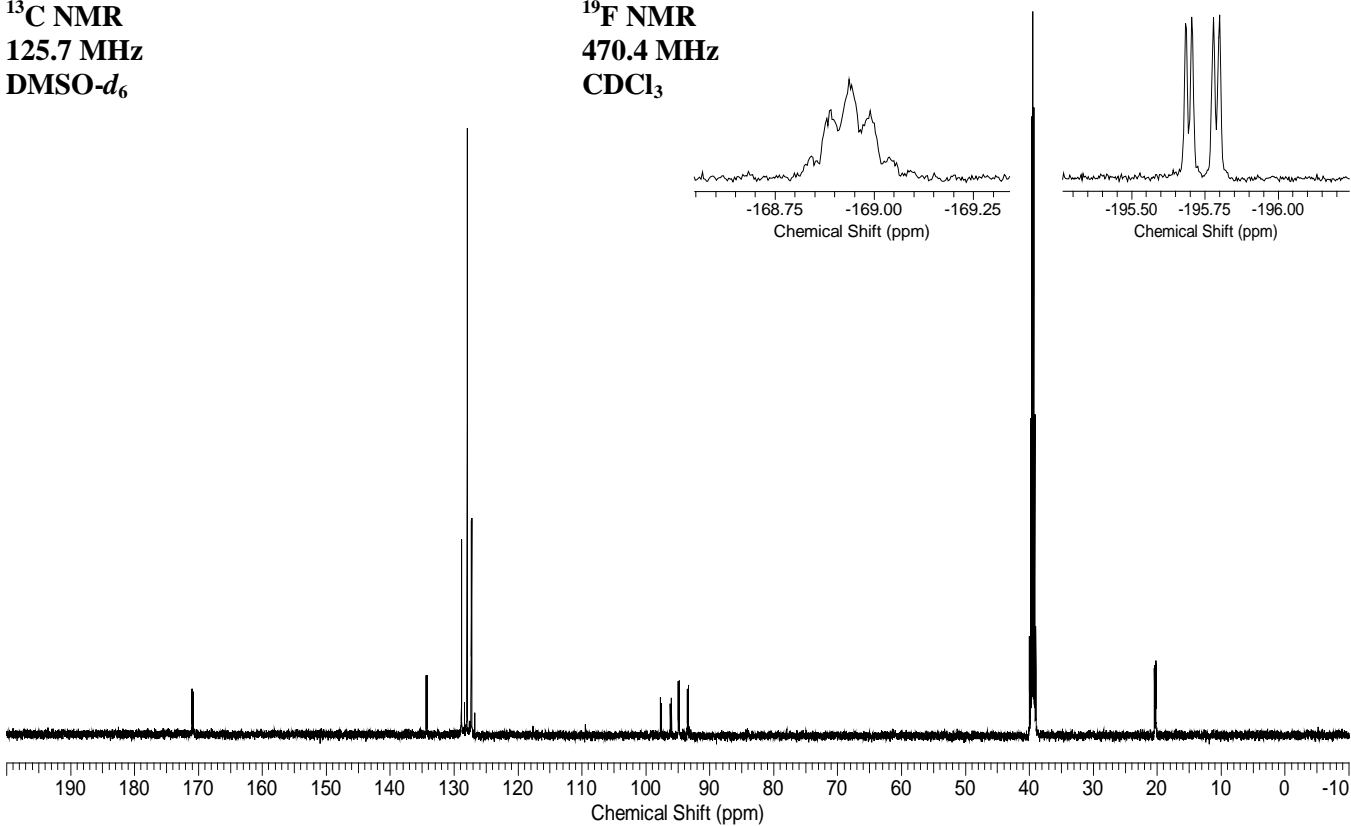

**<sup>1</sup>H NMR**  
**500 MHz**  
**CDCl<sub>3</sub>**

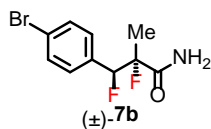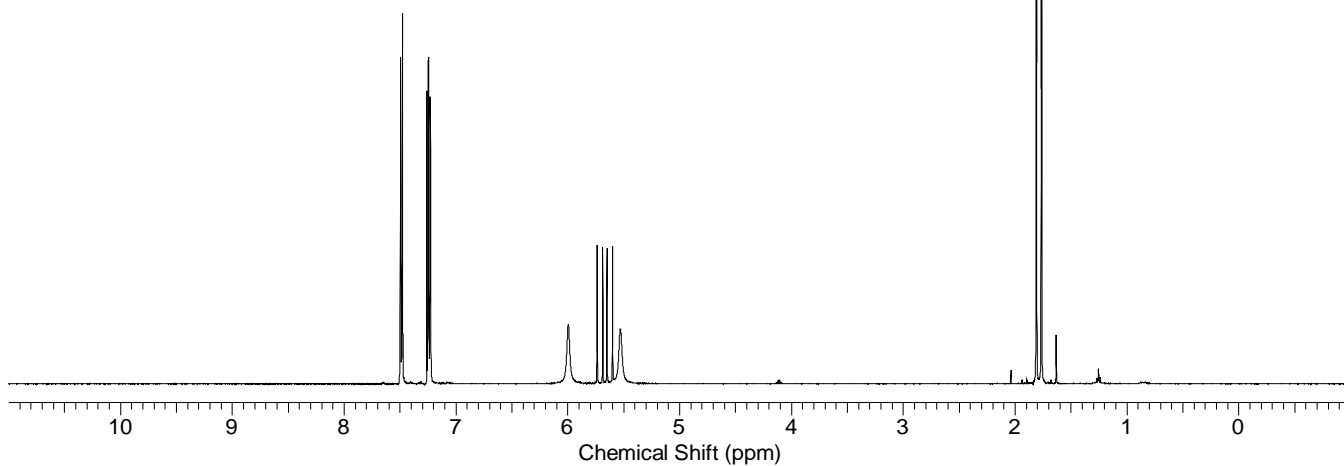

**<sup>13</sup>C NMR**  
**125.7 MHz**  
**CDCl<sub>3</sub>**

**<sup>19</sup>F NMR**  
**470.4 MHz**  
**CDCl<sub>3</sub>**

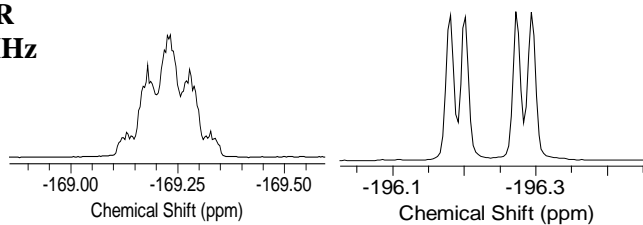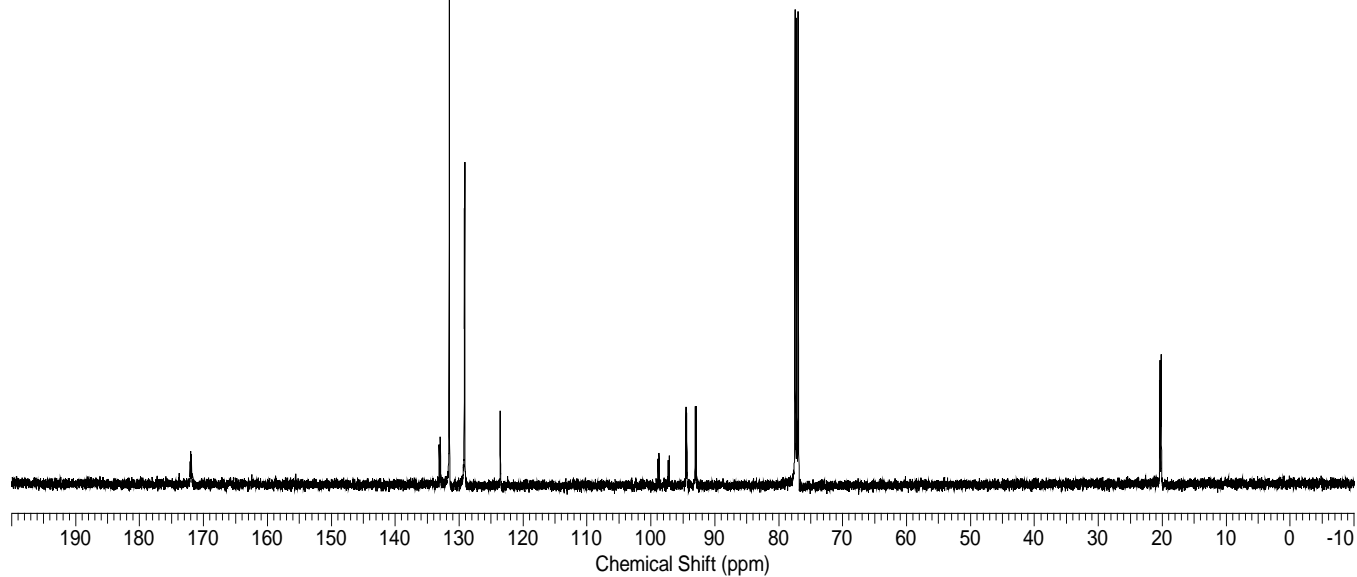

**<sup>1</sup>H NMR**  
**500 MHz**  
**CDCl<sub>3</sub>**

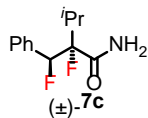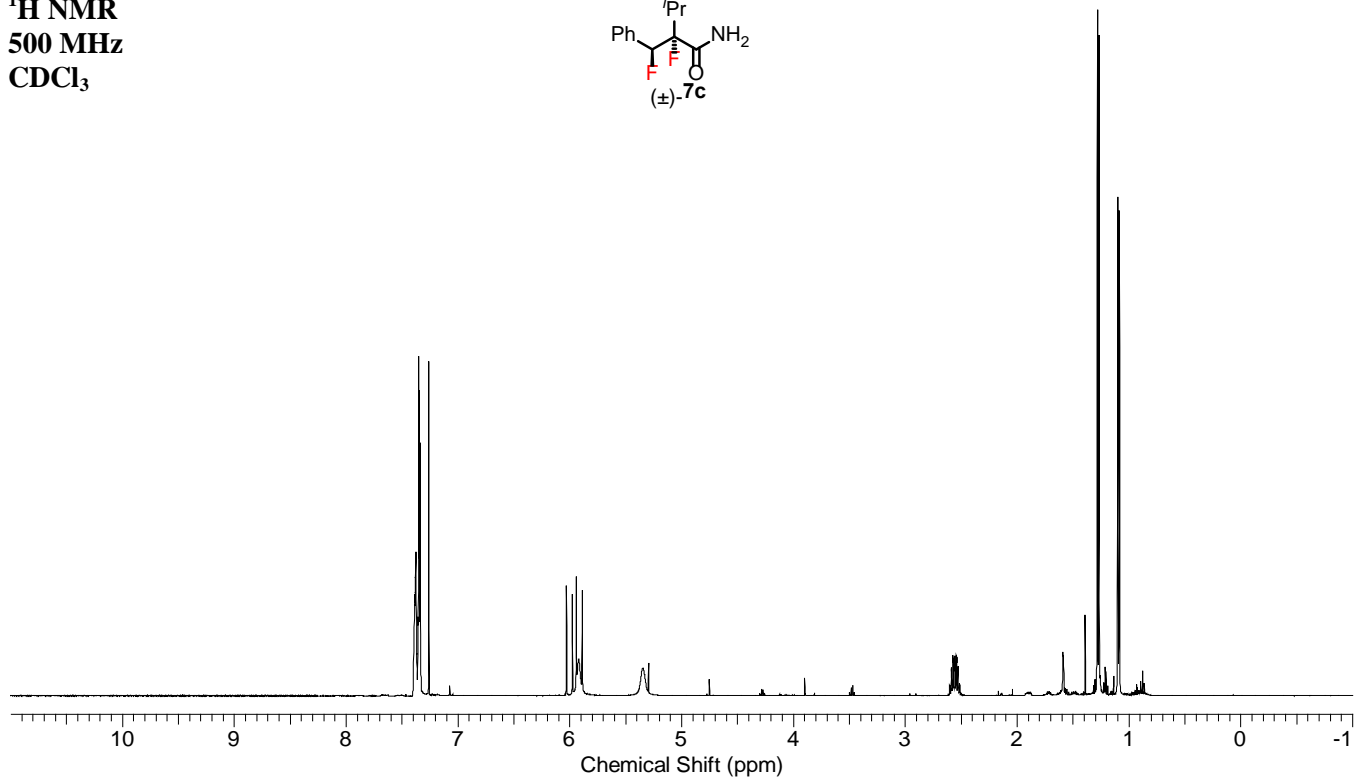

**<sup>13</sup>C NMR**  
**125.7 MHz**  
**CDCl<sub>3</sub>**

**<sup>19</sup>F NMR**  
**470.4 MHz**  
**CDCl<sub>3</sub>**

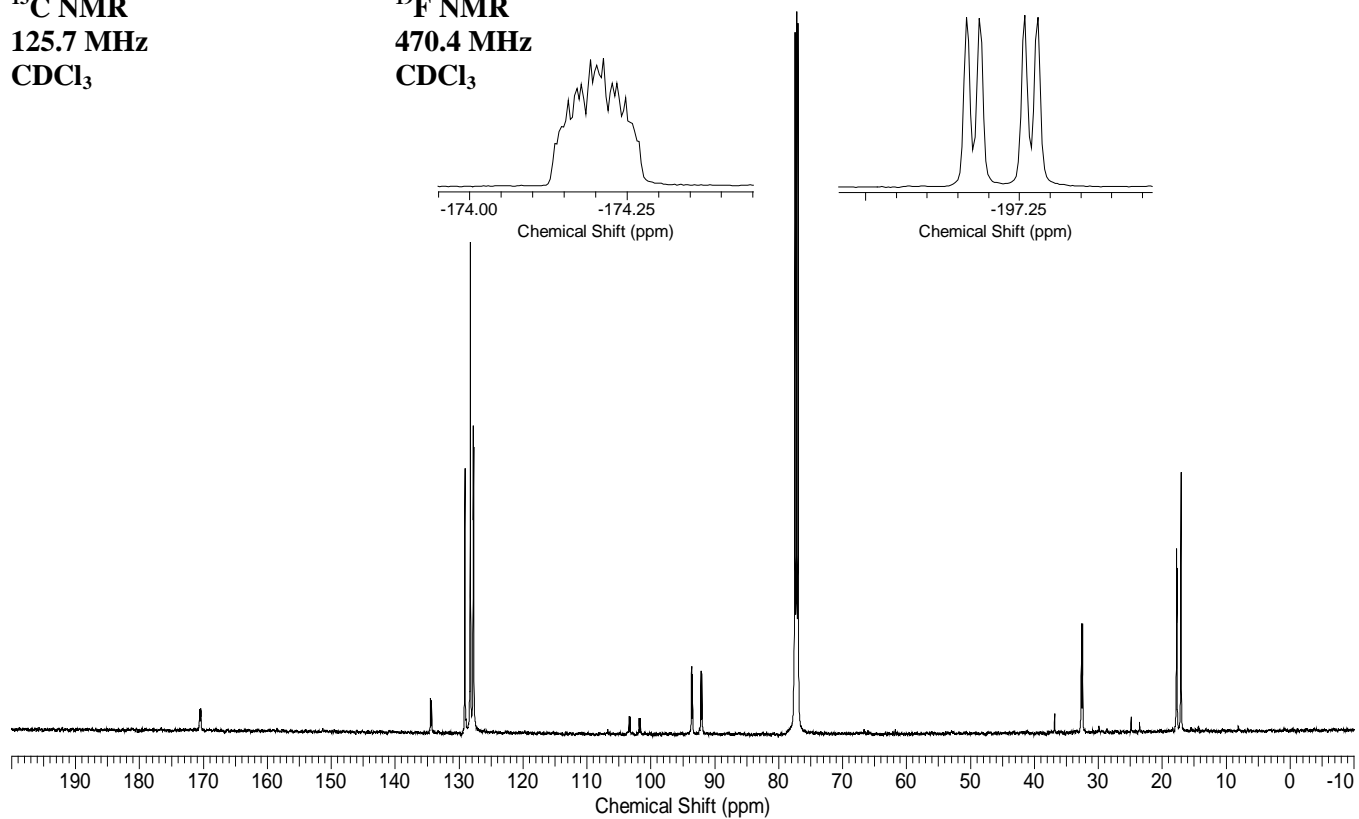

**<sup>1</sup>H NMR**  
**500 MHz**  
**CDCl<sub>3</sub>**

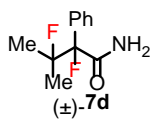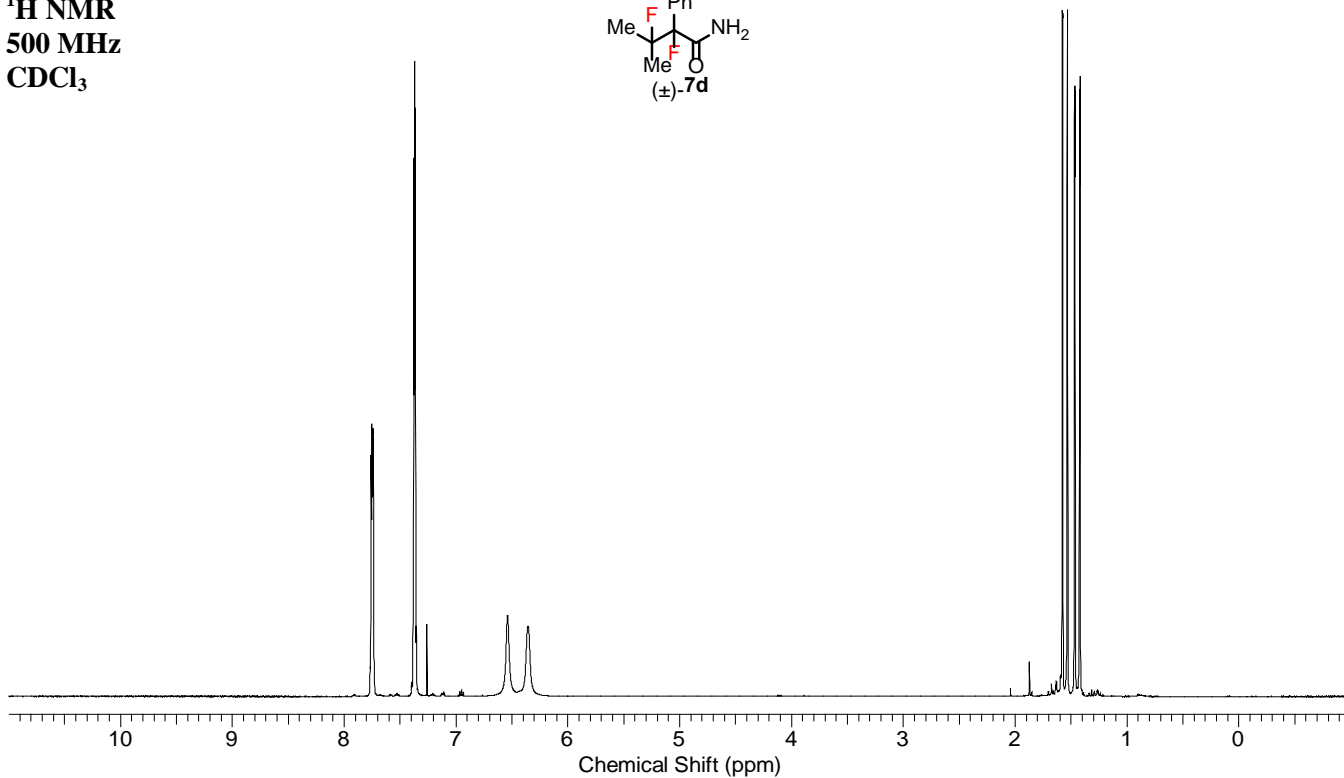

**<sup>13</sup>C NMR**  
**125.7 MHz**  
**CDCl<sub>3</sub>**

**<sup>19</sup>F NMR**  
**470.4 MHz**  
**CDCl<sub>3</sub>**

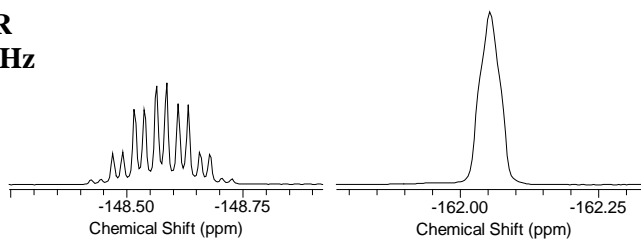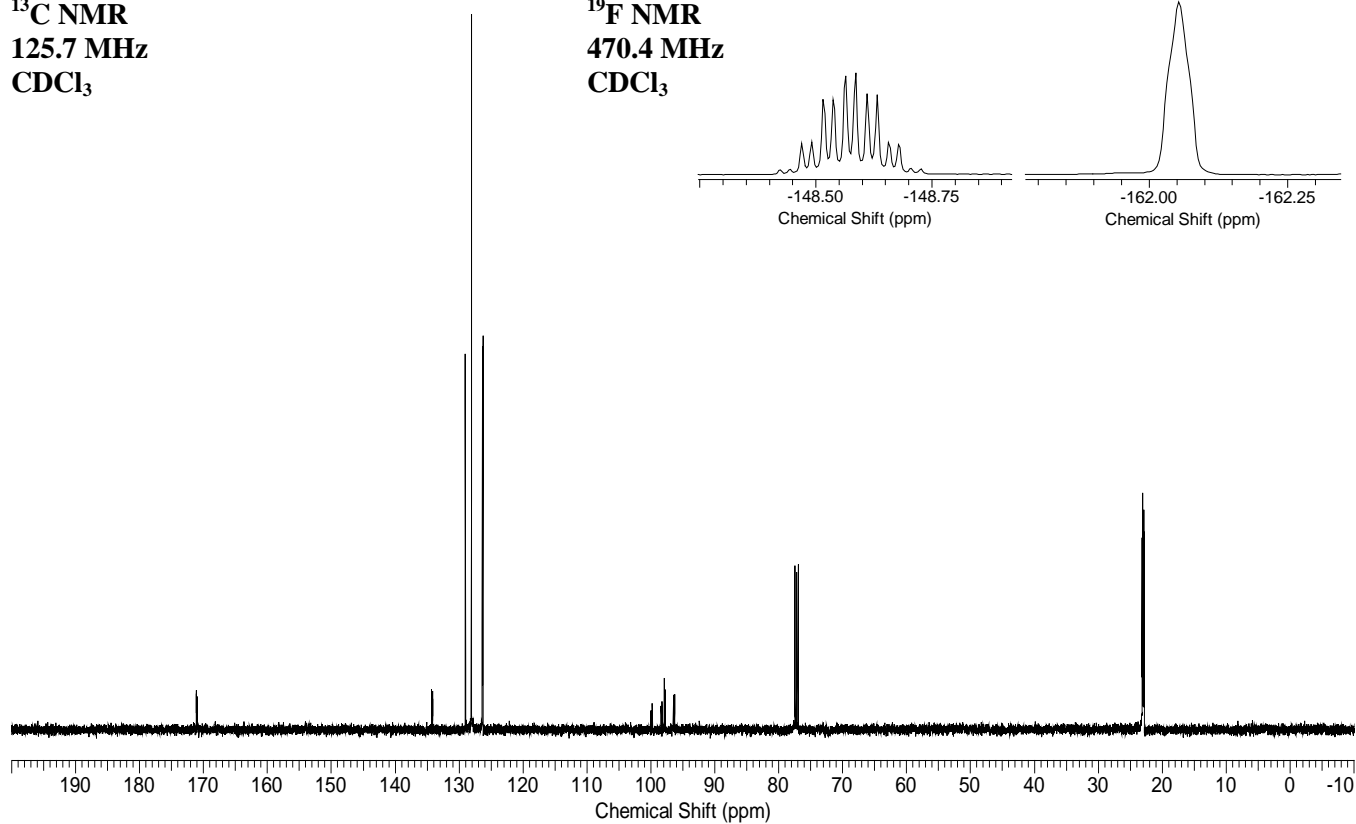



**<sup>1</sup>H NMR**  
**500 MHz**  
**CDCl<sub>3</sub>**

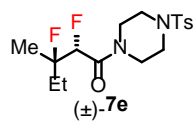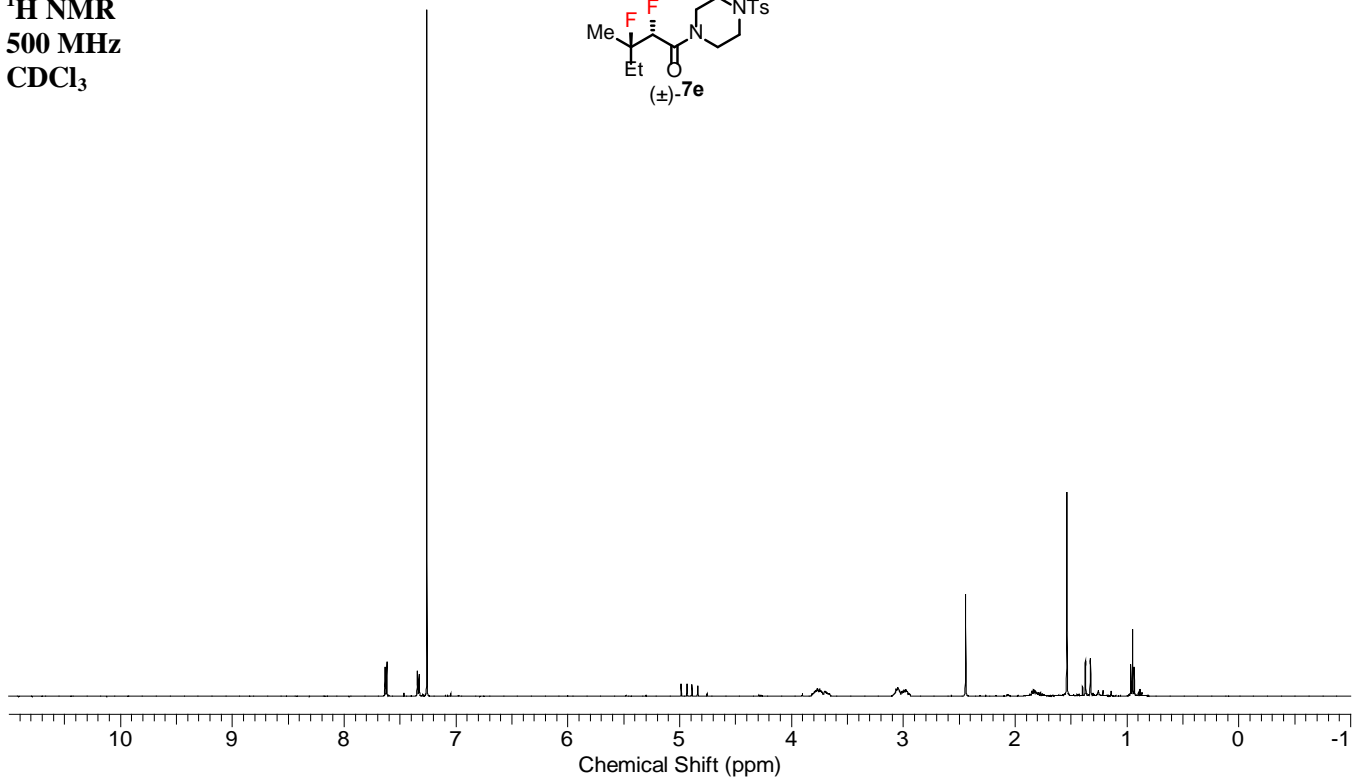

**<sup>13</sup>C NMR**  
**125.7 MHz**  
**CDCl<sub>3</sub>**

**<sup>19</sup>F NMR**  
**470.4 MHz**  
**CDCl<sub>3</sub>**

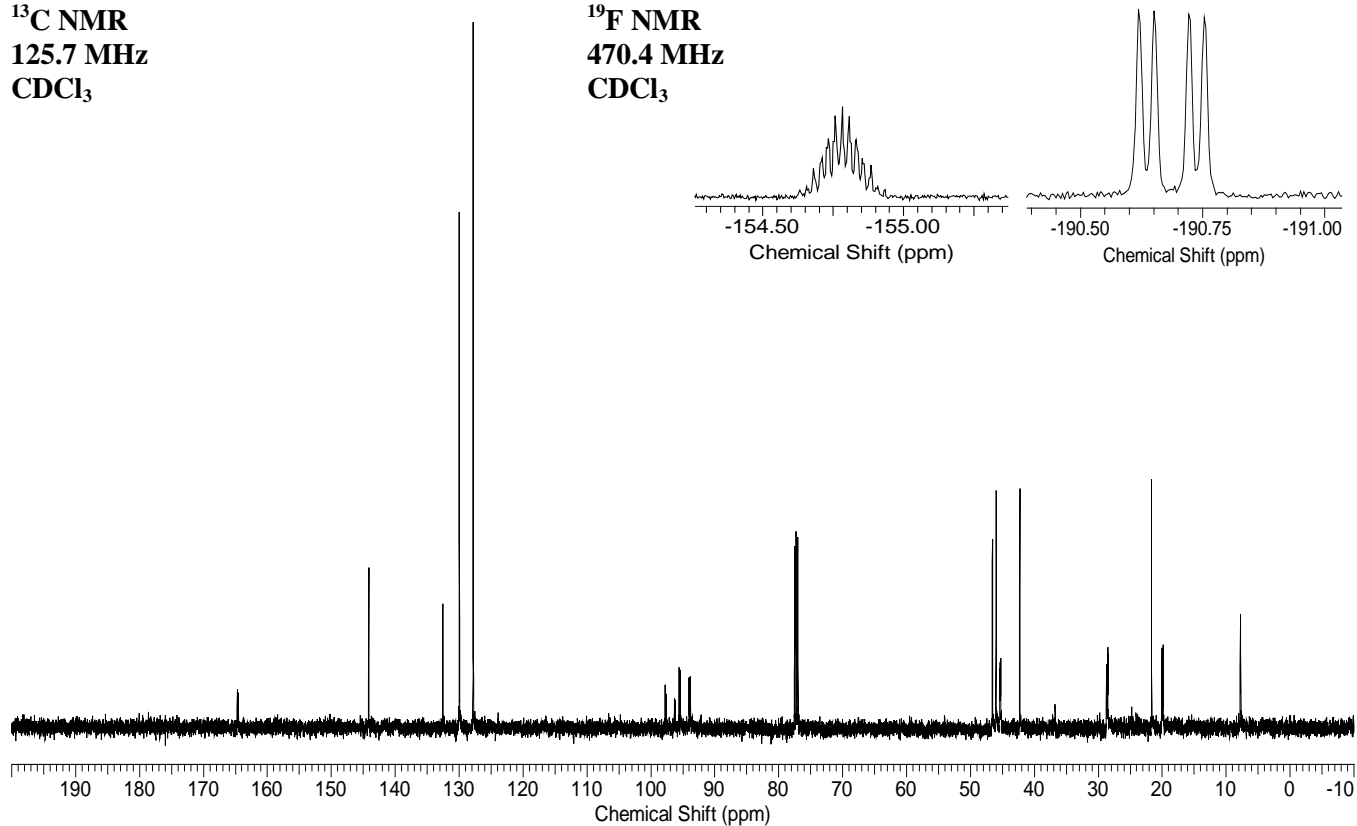

**<sup>1</sup>H NMR**  
**500 MHz**  
**CDCl<sub>3</sub>**

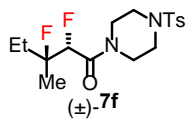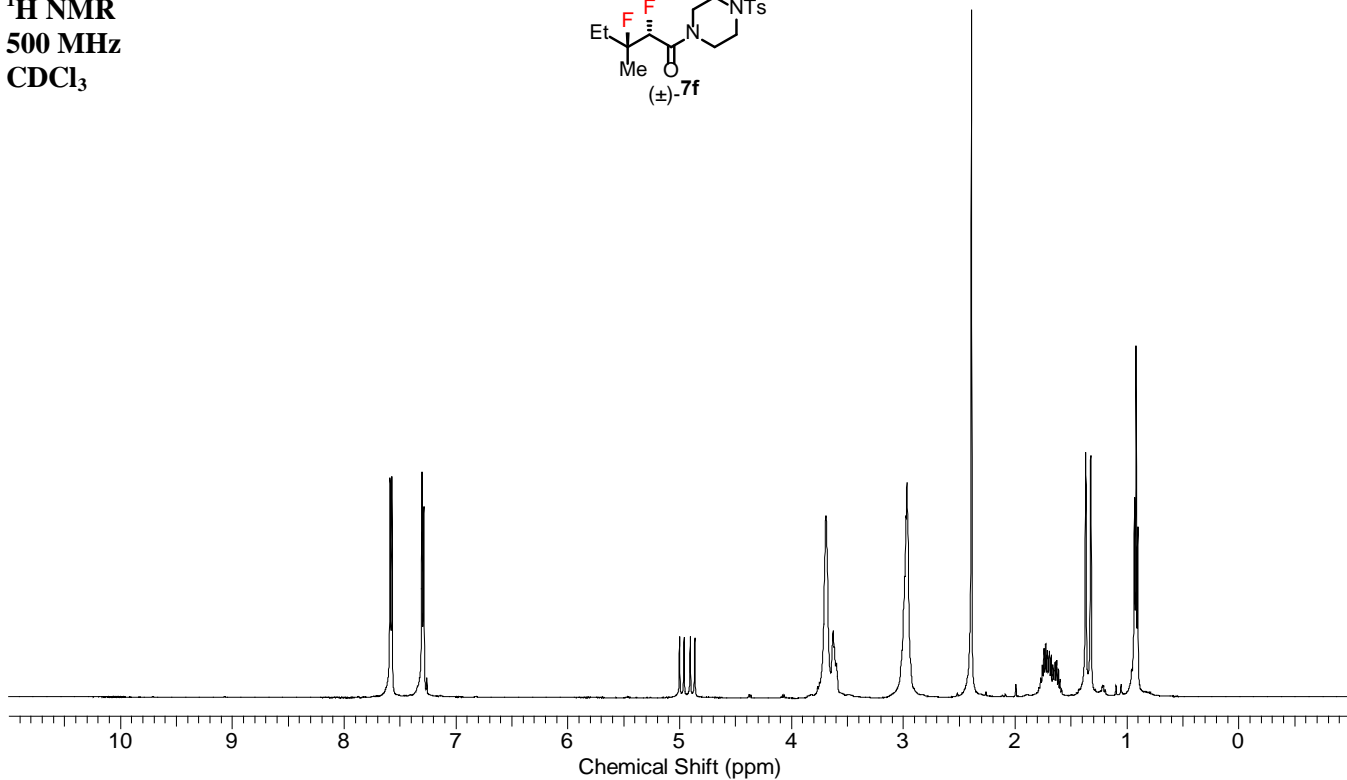

**<sup>13</sup>C NMR**  
**125.7 MHz**  
**CDCl<sub>3</sub>**

**<sup>19</sup>F NMR**  
**470.4 MHz**  
**CDCl<sub>3</sub>**

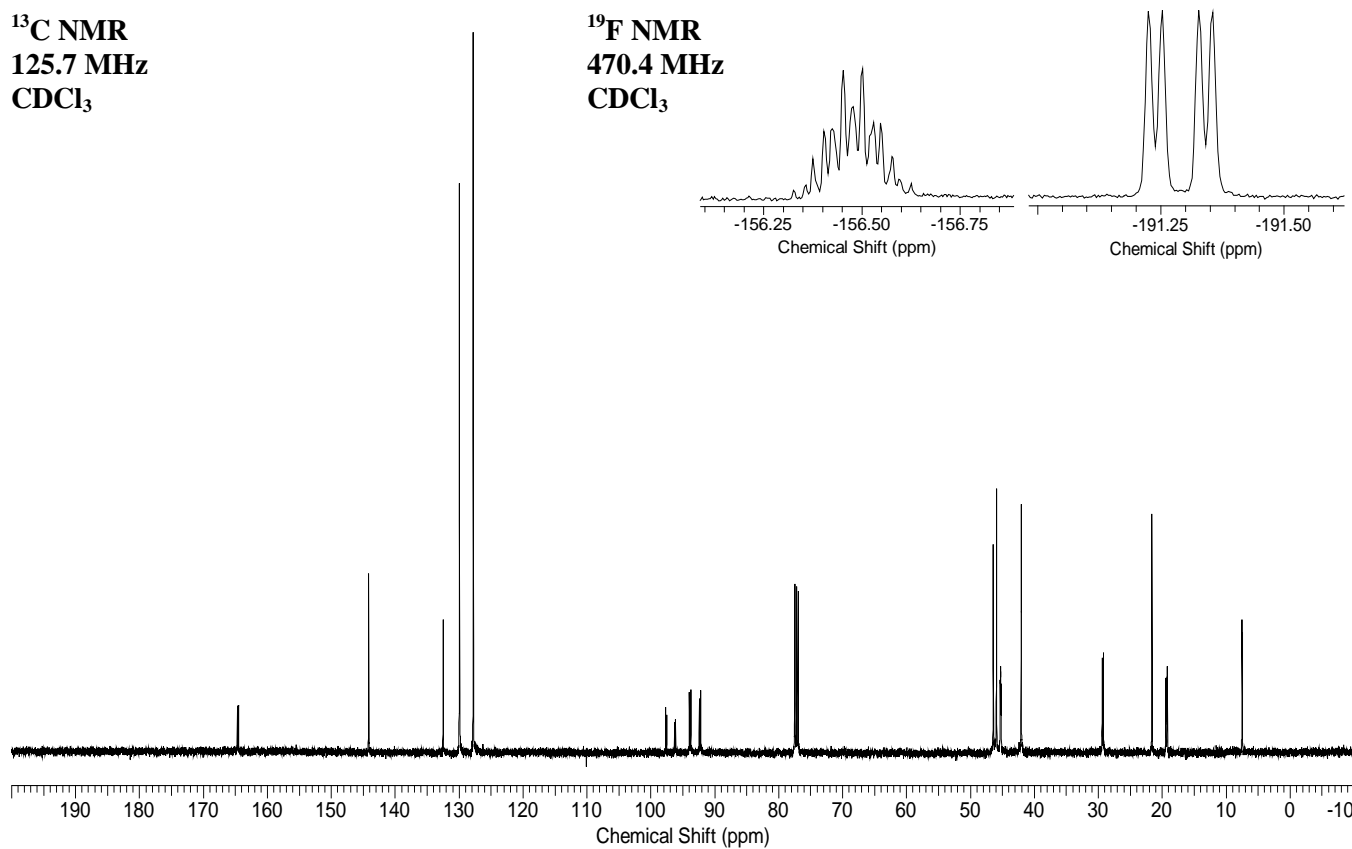

**<sup>1</sup>H NMR**  
**500 MHz**  
**CDCl<sub>3</sub>**

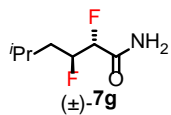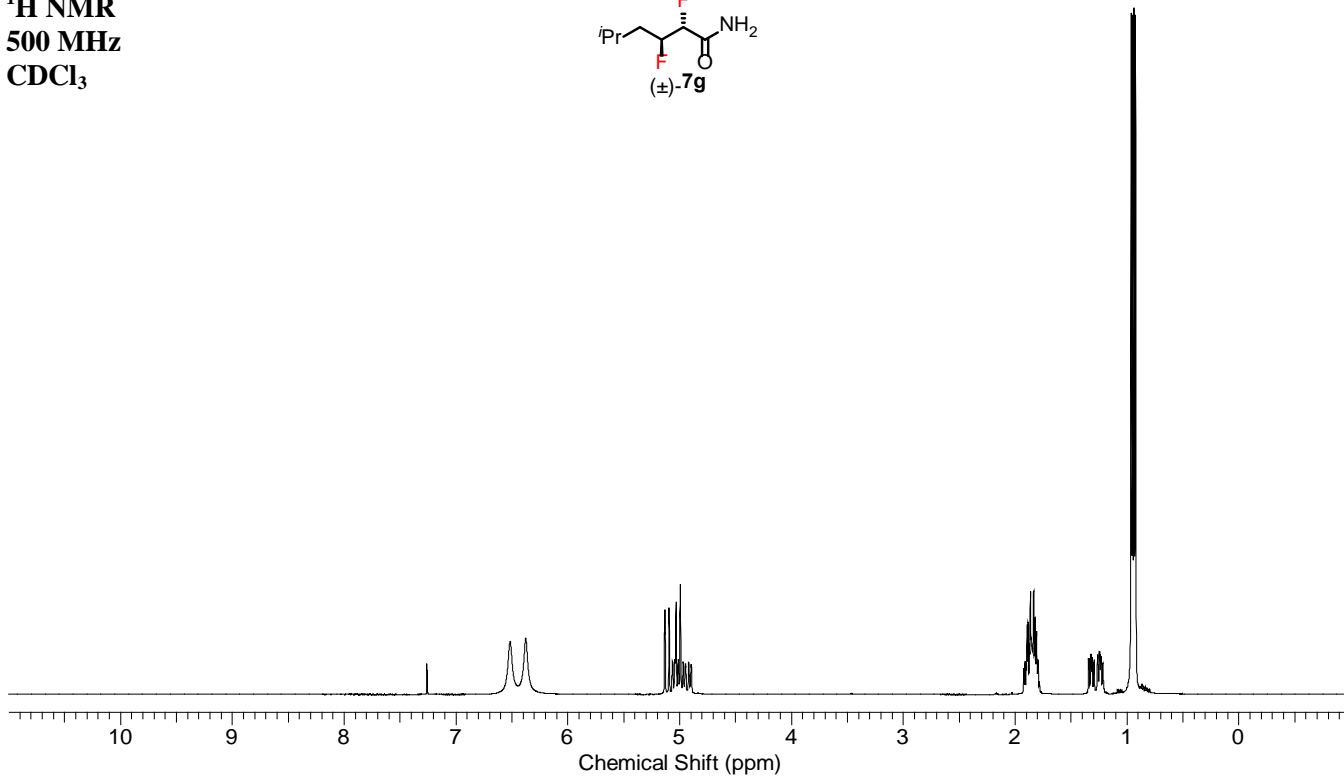

**<sup>13</sup>C NMR**  
**125.7 MHz**  
**CDCl<sub>3</sub>**

**<sup>19</sup>F NMR**  
**470.4 MHz**  
**CDCl<sub>3</sub>**

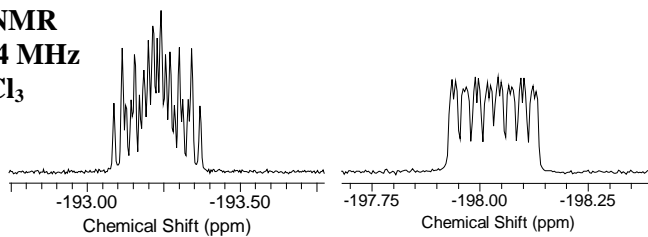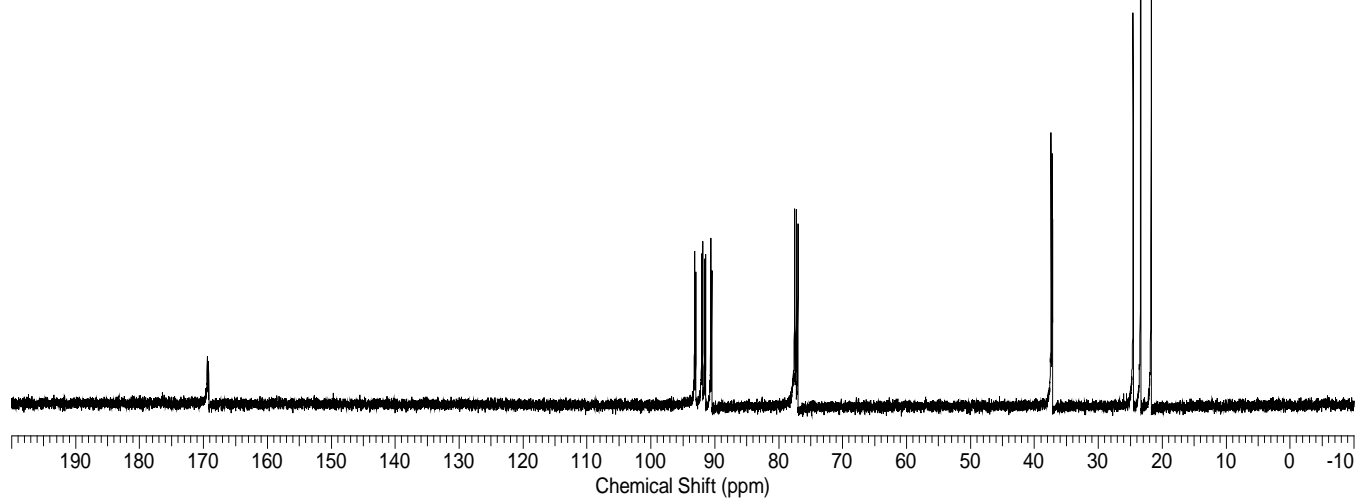

**<sup>1</sup>H NMR**  
**500 MHz**  
**CDCl<sub>3</sub>**

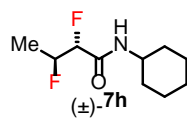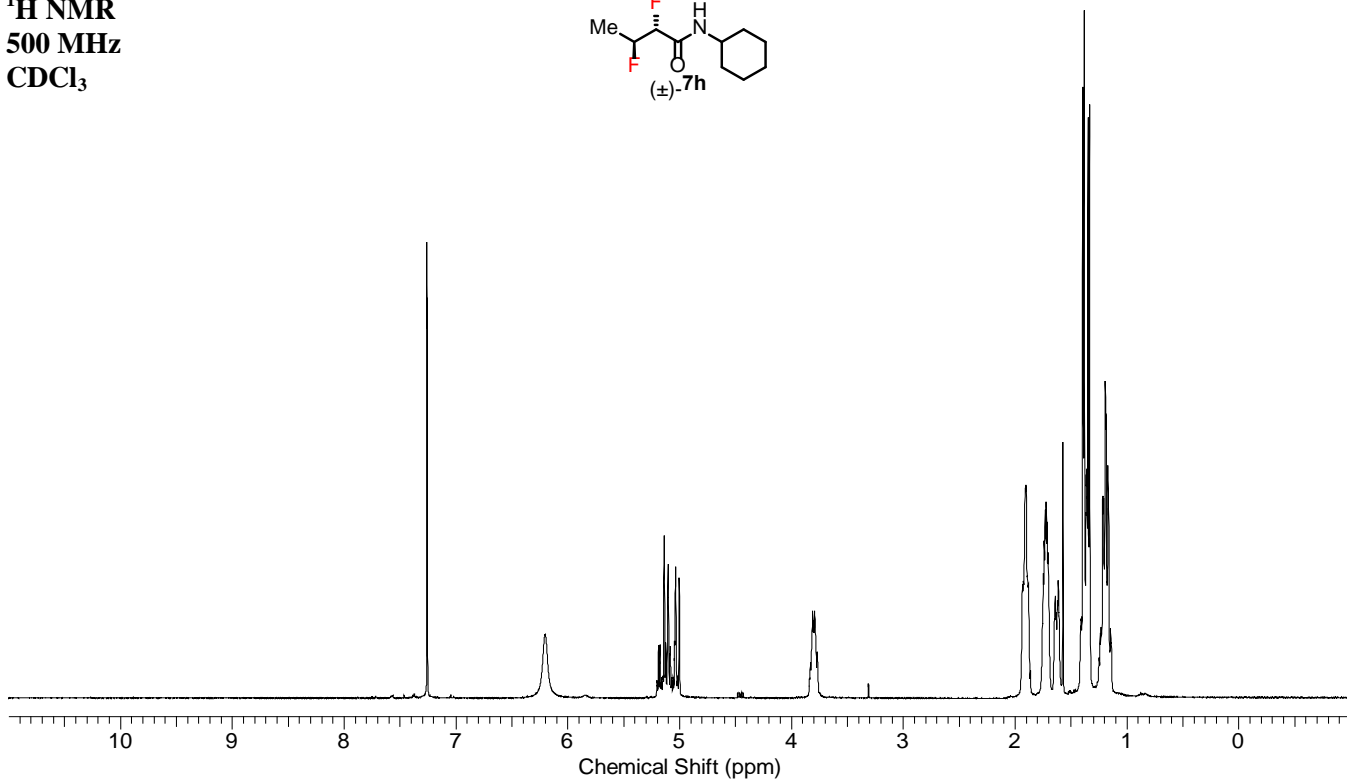

**<sup>13</sup>C NMR**  
**125.7 MHz**  
**CDCl<sub>3</sub>**

**<sup>19</sup>F NMR**  
**376.3 MHz**  
**CDCl<sub>3</sub>**

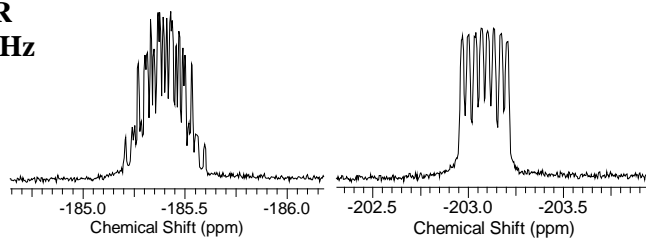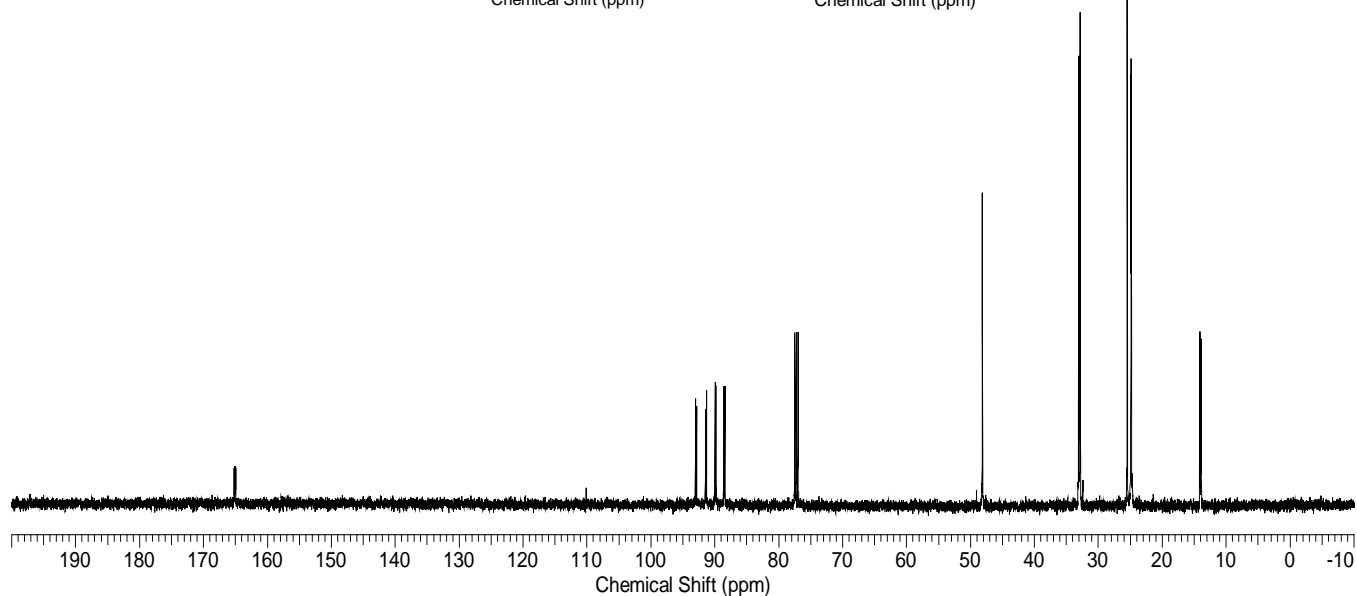

**<sup>1</sup>H NMR**  
**500 MHz**  
**CDCl<sub>3</sub>**

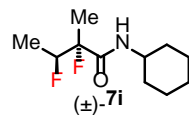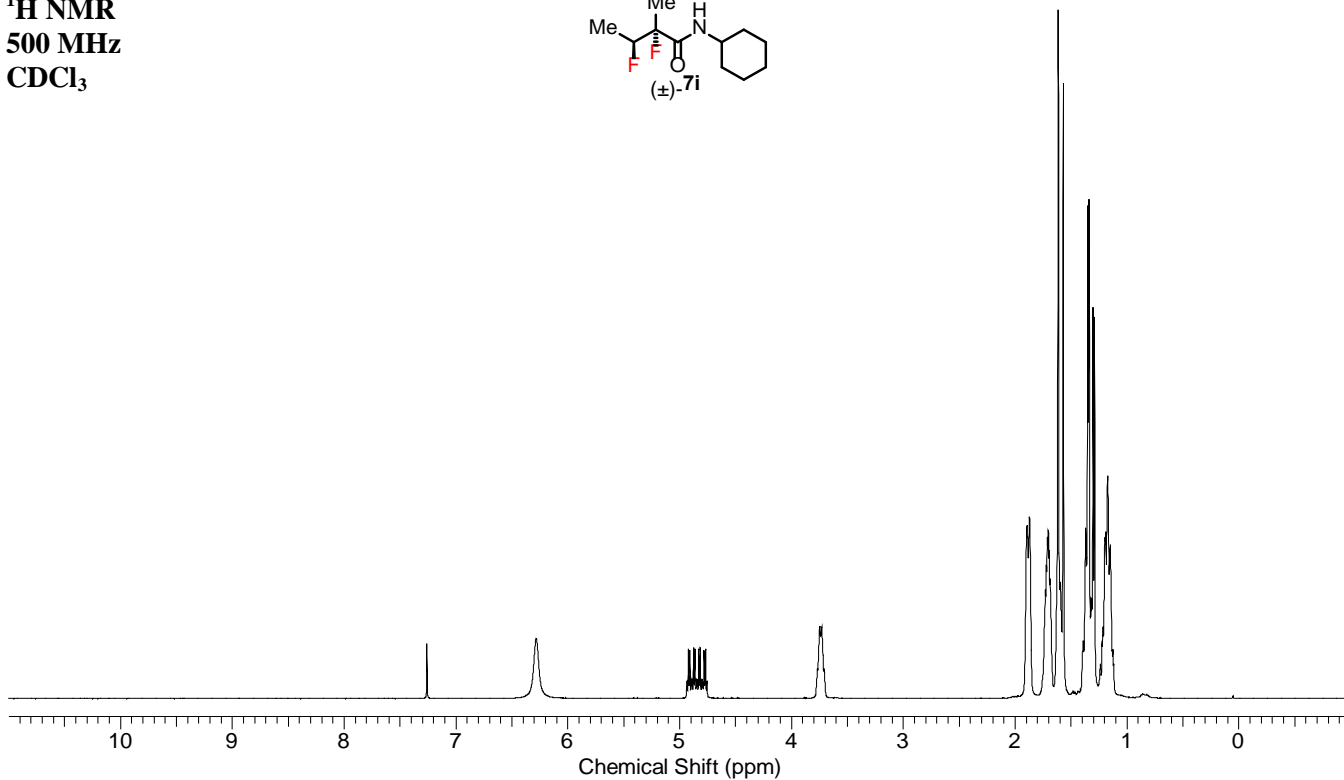

**<sup>13</sup>C NMR**  
**125.7 MHz**  
**CDCl<sub>3</sub>**

**<sup>19</sup>F NMR**  
**470.4 MHz**  
**CDCl<sub>3</sub>**

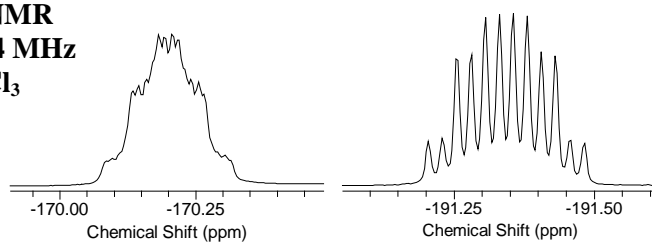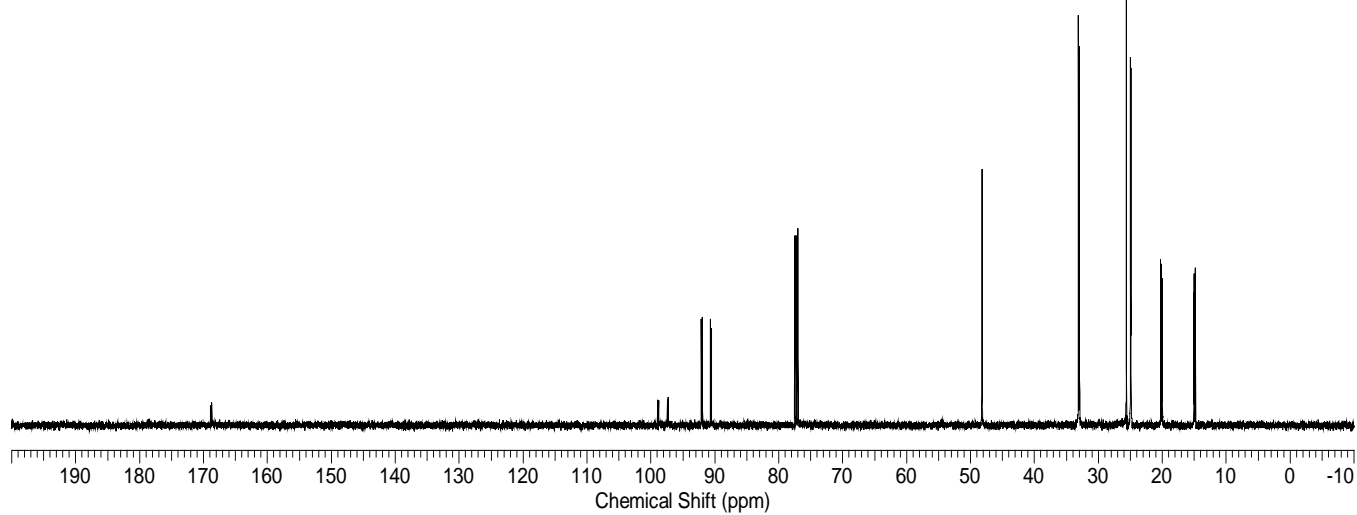

**<sup>1</sup>H NMR**  
**500 MHz**  
**CDCl<sub>3</sub>**

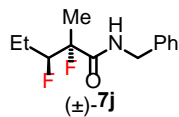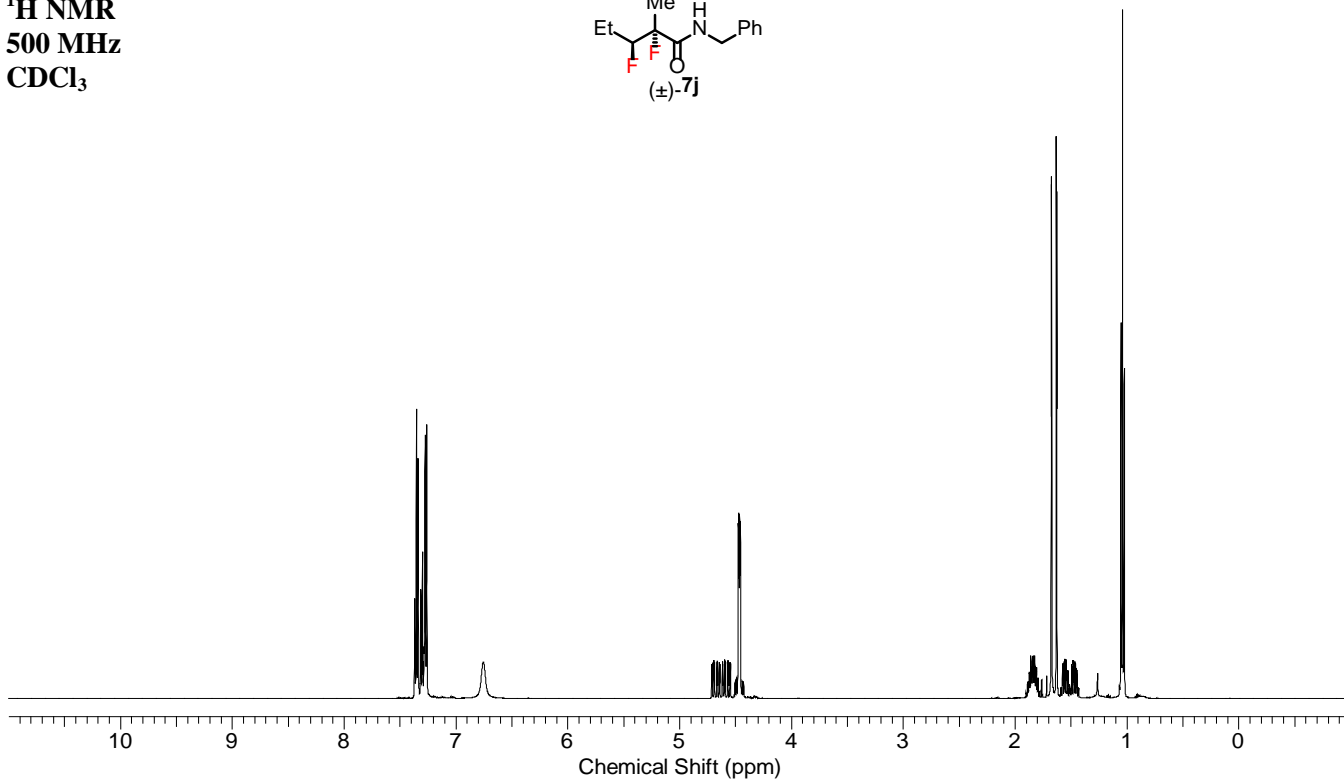

**<sup>13</sup>C NMR**  
**125.7 MHz**  
**CDCl<sub>3</sub>**

**<sup>19</sup>F NMR**  
**376.3 MHz**  
**CDCl<sub>3</sub>**

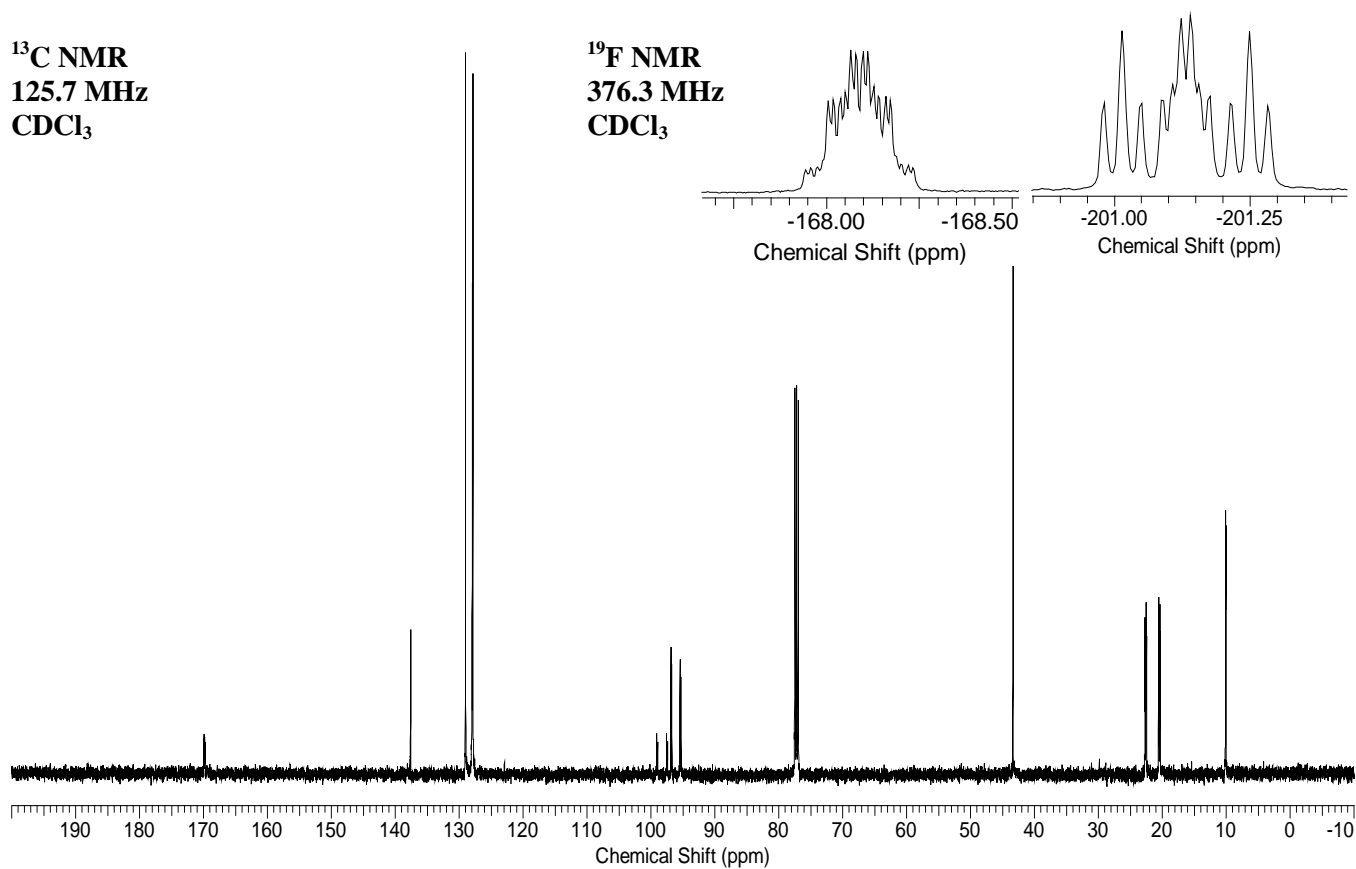

**<sup>1</sup>H NMR**  
500 MHz  
CDCl<sub>3</sub>

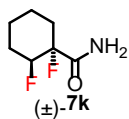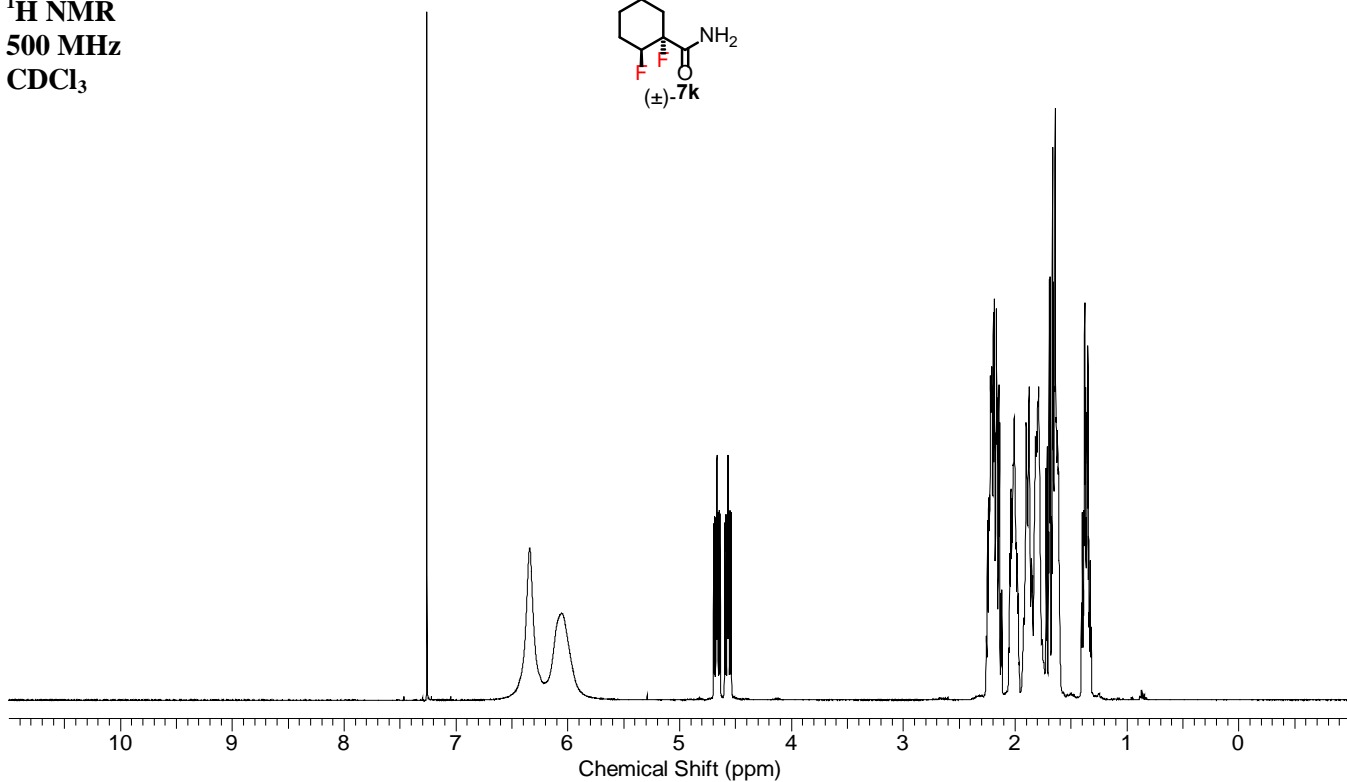

**<sup>13</sup>C NMR**  
125.7 MHz  
CDCl<sub>3</sub>

**<sup>19</sup>F NMR**  
470.4 MHz  
CDCl<sub>3</sub>

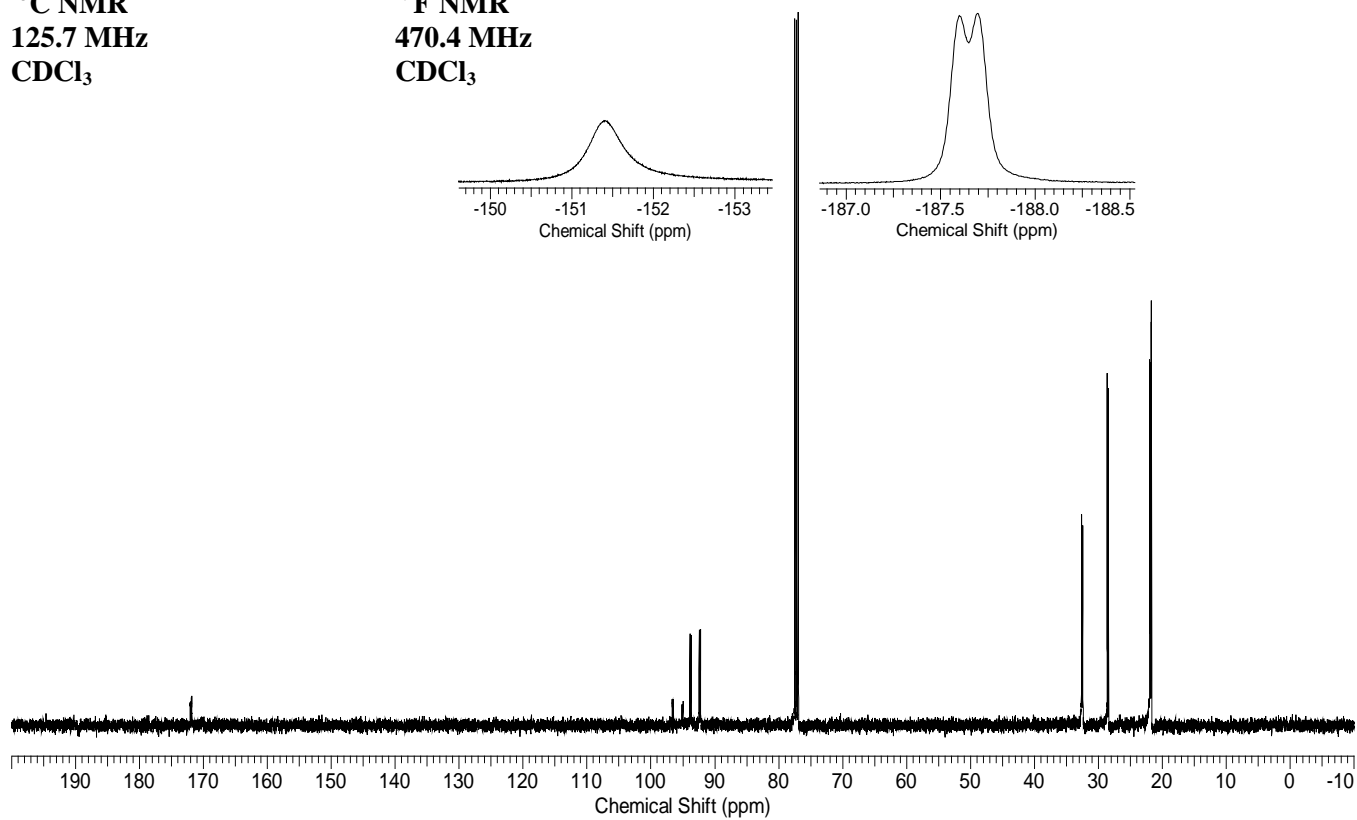

Supplement: NIHMS826600-supplement-Supporting_Information.pdf [file NIHMS826600-supplement-Supporting_Information.pdf]
